# Supplementary material for: Tropical potato breeding: population structure, genetic diversity and putative regions under selection in a Brazilian tetraploid potato germplasm
Source: Research Square preprint supplement (doi:10.21203/rs.3.rs-6734436/v1), 2025-06-17
Supplement: Supplementary file 1 [file 11b42bac698e59c92b7670cc.xlsx]

## Sheet: Planilha1
Tropical potato breeding: population structure, genetic diversity and putative regions under selection in a Brazilian tetraploid potato germplasm
Givanildo Rodrigues da Silva1, Gustavo Nandi1, Marcio F. R. Resende2, Tiago de Souza Marçal3, Thiago Leandro Factor4, Fernando Angelo Piotto1*
1 Genetics Department, Luiz de Queiroz College of Agriculture, University of São Paulo, Piracicaba, São Paulo, Brazil
2 Horticultural Sciences Department, University of Florida, Gainesville, Florida, USA
3 Department of Biology, University of Lavras, Lavras, Minas Gerais, Brazil
4 Horticulture Center, Agronomic Institute (IAC), Campinas, São Paulo, Brazil
*Corresponding author: fpiotto@usp.br

## Sheet: Supplementary Table S1
Supplementary Table S1. Clone number, name, type of clone, clustering considering STRUCTURE output, by Nei genetic distance and origin, breeding initiative and parentagen information avaliable.
Clone Number	Clone Name	Clone Number	Type of Clone	Cluster by STRUCTURE	Cluster by HC (Nei genetic distance)	Cluster by origin	Breeding Initiative	Origin	Female Parent	Male Parent	Parent1	Parent2	Pseudonym
1	USP01-05	1	Advanced	2	2	Brazilian	UFLA	Brazil
2	KRC08-08	2	Advanced	3	3	Brazilian	UFLA	Brazil
4	LCS10-15	4	Advanced	2	4	Brazilian	UFLA	Brazil
7	USP-R-01	7	Advanced	3	3	Brazilian	USP	Brazil
8	CBM19-39	8	Advanced	4	4	Brazilian	UFLA	Brazil	LT8	Baraka
9	CCF11-05	9	Advanced	4	4	Brazilian	UFLA	Brazil			GRO 1809	DGN 2103
15	LCS22-10	15	Advanced	2	2	Brazilian	UFLA	Brazil
16	RPC04-49	16	Advanced	4	4	Brazilian	UFLA	Brazil	MLG 20-12	OGC 06-45
17	USP01-16	17	Advanced	4	4	Brazilian	UFLA	Brazil
18	MOF01-11	18	Advanced	4	4	Brazilian	UFLA	Brazil	PRM 348	CBM 22-19
19	GSI06-03	19	Advanced	4	4	Brazilian	UFLA	Brazil
20	RPC01-18	20	Advanced	2	2	Brazilian	UFLA	Brazil	MLG 02-12	OGC 06-45
23	LCS03-37	23	Advanced	2	2	Brazilian	UFLA	Brazil
24	TSB11-04	24	Advanced	2	2	Brazilian	UFLA	Brazil
25	GRO14-17	25	Advanced	4	4	Brazilian	UFLA	Brazil
26	NES08-74	26	Advanced	3	3	Brazilian	UFLA	Brazil
27	CCF24-25	27	Advanced	4	4	Brazilian	UFLA	Brazil			DGN 2103	Harley Blackwell
28	KCR08-06	28	Advanced	3	3	Brazilian	UFLA	Brazil
32	TSB07-04	32	Advanced	2	2	Brazilian	UFLA	Brazil
33	LCS28-25	33	Advanced	2	2	Brazilian	UFLA	Brazil
34	GRO21-42	34	Advanced	3	3	Brazilian	UFLA	Brazil
35	LCS06-03	35	Advanced	2	2	Brazilian	UFLA	Brazil
37	Agata	37	Cultivar	3	3	Foreign	Foreign	Netherlands			BM 52 72	Sirco
38	IND02-37	38	Advanced	2	4	Brazilian	UFLA	Brazil
39	KCR01-12	39	Advanced	3	3	Brazilian	UFLA	Brazil
40	USP02-09	40	Advanced	4	4	Brazilian	UFLA	Brazil
41	KCR08-05	41	Advanced	3	3	Brazilian	UFLA	Brazil
44	NES07-150	44	Advanced	3	3	Brazilian	UFLA	Brazil
45	GSI05-10	45	Advanced	4	4	Brazilian	UFLA	Brazil
48	USP01-21	48	Advanced	4	4	Brazilian	UFLA	Brazil
51	KCR01-10	51	Advanced	3	3	Brazilian	UFLA	Brazil
53	USP01-43	53	Advanced	2	2	Brazilian	UFLA	Brazil
54	USP01-10	54	Advanced	2	2	Brazilian	UFLA	Brazil
55	CBM19-11	55	Advanced	4	4	Brazilian	UFLA	Brazil	LT8	Baraka
57	CMM01-33	57	Advanced	3	3	Brazilian	UFLA	Brazil
59	KCR03-04	59	Advanced	3	3	Brazilian	UFLA	Brazil
60	Atlantic	60	Cultivar	4	4	Foreign	Foreign	United States			Wauseon	Lenape (B 5141 6)
63	KCR01-20	63	Advanced	3	3	Brazilian	UFLA	Brazil
66	Asterix	66	Cultivar	1	2	Foreign	Foreign	Netherlands			Cardinal	SVP VE 70 9
67	USP02-15	67	Advanced	4	4	Brazilian	UFLA	Brazil
68	USP-R-02	68	Advanced	2	4	Brazilian	USP	Brazil
69	RPC01-43	69	Advanced	2	2	Brazilian	UFLA	Brazil	MLG 02-12	OGC 06-45
71	SR3-32-16	71	Advanced	3	3	Brazilian	UFLA	Brazil
74	SR2-24-03	74	Advanced	4	4	Brazilian	UFLA	Brazil
76	GMR08-22	76	Advanced	4	4	Brazilian	UFLA	Brazil
77	KCR09-05	77	Advanced	4	4	Brazilian	UFLA	Brazil
78	CTB39-13	78	Advanced	4	3	Brazilian	UFLA	Brazil	Vivaldi	CBM 2-21
79	USP01-35	79	Advanced	2	2	Brazilian	UFLA	Brazil
80	USP02-16	80	Advanced	4	4	Brazilian	UFLA	Brazil
81	CTB36-17	81	Advanced	4	4	Brazilian	UFLA	Brazil	CBM 08-17	Pukara
82	GMR16-57	82	Advanced	3	3	Brazilian	UFLA	Brazil
84	IND01-50	84	Advanced	4	4	Brazilian	UFLA	Brazil
86	RPC12-05	86	Advanced	2	2	Brazilian	UFLA	Brazil	MLG 23-24	OGC 06-69
87	TSB06-08	87	Advanced	2	2	Brazilian	UFLA	Brazil
88	USP-R-03	88	Advanced	1	4	Brazilian	USP	Brazil
89	MOF07-35	89	Advanced	4	4	Brazilian	UFLA	Brazil	PRM 348	RVS 06-37
91	KCR10-02	91	Advanced	3	3	Brazilian	UFLA	Brazil
92	CMA-346	92	Advanced	2	2	Brazilian	UFLA	Brazil	OAS 3-30	JUG 2-20
95	CMM02-46	95	Advanced	3	3	Brazilian	UFLA	Brazil
96	CTB37-12	96	Advanced	4	2	Brazilian	UFLA	Brazil
98	SR2-20-01	98	Advanced	2	2	Brazilian	UFLA	Brazil
100	LCS09-26	100	Advanced	2	2	Brazilian	UFLA	Brazil
102	LCS22-19	102	Advanced	2	2	Brazilian	UFLA	Brazil
103	CBM16-16	103	Advanced	3	3	Brazilian	UFLA	Brazil	LT-7	Epamig 76-0526
104	Cupido	104	Cultivar	3	3	Foreign	Foreign	Netherlands			W 72 22 496	Estima
106	USP-R-04	106	Advanced	4	2	Brazilian	USP	Brazil
108	IRF12-34	108	Advanced	4	4	Brazilian	UFLA	Brazil
109	IRF01-41	109	Advanced	3	3	Brazilian	UFLA	Brazil	SR1 07-04	CBM 07-78
110	CCF04-13	110	Advanced	4	4	Brazilian	UFLA	Brazil			SR 10740	DGN 4002
112	CMM01-60	112	Advanced	2	3	Brazilian	UFLA	Brazil
113	IRF07-61	113	Advanced	4	4	Brazilian	UFLA	Brazil	SR1 07-04	CBM 22-19
116	KCR01-23	116	Advanced	3	3	Brazilian	UFLA	Brazil
117	CTB37-16	117	Advanced	4	2	Brazilian	UFLA	Brazil
118	CBM09-10	118	Advanced	4	1	Brazilian	UFLA	Brazil	LT9	Baraka			397
119	USP01-31	119	Advanced	2	2	Brazilian	UFLA	Brazil
121	CCF04-01	121	Advanced	4	4	Brazilian	UFLA	Brazil			SR 10740	DGN 4002
122	LCS28-03	122	Advanced	2	2	Brazilian	UFLA	Brazil
124	RPC11-01	124	Advanced	2	2	Brazilian	UFLA	Brazil	MLG 23-24	OGC 06-52
125	RPC12-47	125	Advanced	2	2	Brazilian	UFLA	Brazil	MLG 23-24	OGC 06-69
128	CCF27-15	128	Advanced	4	4	Brazilian	UFLA	Brazil			DGN 4002	FL 1867
129	LCS26-22	129	Advanced	2	2	Brazilian	UFLA	Brazil
130	RPC09-01	130	Advanced	2	2	Brazilian	UFLA	Brazil	MLG 22-23	OGC 06-69
131	USP01-12	131	Advanced	3	3	Brazilian	UFLA	Brazil
132	RSV21-03	132	Advanced	4	4	Brazilian	UFLA	Brazil
133	CCF16-03	133	Advanced	4	4	Brazilian	UFLA	Brazil			DGN 2103	Snowden
134	LCS03-17	134	Advanced	2	2	Brazilian	UFLA	Brazil
135	KCR06-05	135	Advanced	3	3	Brazilian	UFLA	Brazil
136	CTB17-26	136	Advanced	4	2	Brazilian	UFLA	Brazil	CBM 5-08	CBM 7-30
137	GMR13-48	137	Advanced	4	4	Brazilian	UFLA	Brazil
138	KCR02-04	138	Advanced	3	3	Brazilian	UFLA	Brazil
139	USP-R-05	139	Advanced	3	3	Brazilian	USP	Brazil
141	IRF10-55	141	Advanced	4	4	Brazilian	UFLA	Brazil	SR2 50-02	CBM 22-19
142	USP-R-06	142	Advanced	3	4	Brazilian	USP	Brazil
143	MOF07-26	143	Advanced	4	4	Brazilian	UFLA	Brazil	PRM 348	RVS 06-37
147	USP01-37	147	Advanced	2	2	Brazilian	UFLA	Brazil
148	RSV24-09	148	Advanced	4	4	Brazilian	UFLA	Brazil
150	GRO04-68	150	Advanced	4	2	Brazilian	UFLA	Brazil
151	CBM08-20	151	Advanced	4	4	Brazilian	UFLA	Brazil	Baronesa	DTO 28
152	CCF23-21	152	Advanced	4	4	Brazilian	UFLA	Brazil			DGN 4002	Harley Blackwell
153	SR2-30-03	153	Advanced	4	4	Brazilian	UFLA	Brazil
156	USP01-03	156	Advanced	3	3	Brazilian	UFLA	Brazil
157	KCR02-06	157	Advanced	3	3	Brazilian	UFLA	Brazil
158	MOF14-06	158	Advanced	4	4	Brazilian	UFLA	Brazil	PRM 348	CBM 09-10
159	IRF01-96	159	Advanced	3	3	Brazilian	UFLA	Brazil	SR1 07-04	CBM 07-78
161	KCR07-01	161	Advanced	3	3	Brazilian	UFLA	Brazil
162	TSB03-11	162	Advanced	3	3	Brazilian	UFLA	Brazil
163	GRO02-06	163	Advanced	3	3	Brazilian	UFLA	Brazil
164	RPC06-18	164	Advanced	2	2	Brazilian	UFLA	Brazil	MLG 02-13	OGC 06-69
165	IRF09-18	165	Advanced	4	4	Brazilian	UFLA	Brazil
166	SR1-04-02	166	Advanced	4	4	Brazilian	UFLA	Brazil
167	USP-R-07	167	Advanced	2	4	Brazilian	USP	Brazil
168	SRI-05-04	168	Advanced	4	4	Brazilian	UFLA	Brazil
170	RPC01-29	170	Advanced	2	2	Brazilian	UFLA	Brazil	MLG 02-12	OGC 06-45
171	MOF03-18	171	Advanced	4	4	Brazilian	UFLA	Brazil	ESL 58	CBM 09-10
175	LCS28-40	175	Advanced	4	4	Brazilian	UFLA	Brazil
176	RPC12-31	176	Advanced	2	2	Brazilian	UFLA	Brazil	MLG 23-24	OGC 06-69
180	RPC01-48	180	Advanced	2	2	Brazilian	UFLA	Brazil	MLG 02-12	OGC 06-45
181	CTB36-32	181	Advanced	3	4	Brazilian	UFLA	Brazil	CBM 08-17	Pukara
184	GRO14-14	184	Advanced	4	4	Brazilian	UFLA	Brazil
185	RPC01-23	185	Advanced	2	2	Brazilian	UFLA	Brazil	MLG 02-12	OGC 06-45
186	LCS31-28	186	Advanced	1	2	Brazilian	UFLA	Brazil
187	USP-R-08	187	Advanced	4	4	Brazilian	USP	Brazil
189	SR4-05-08	189	Advanced	4	4	Brazilian	UFLA	Brazil
190	LCS16-27	190	Advanced	4	4	Brazilian	UFLA	Brazil
191	IRF10-44	191	Advanced	4	4	Brazilian	UFLA	Brazil	SR2 50-02	CBM 22-19
192	NES01-08	192	Advanced	3	3	Brazilian	UFLA	Brazil
196	KCR06-04	196	Advanced	3	3	Brazilian	UFLA	Brazil
197	USP01-18	197	Advanced	4	4	Brazilian	UFLA	Brazil
198	KCR02-11	198	Advanced	3	3	Brazilian	UFLA	Brazil
200	RSV09-07	200	Advanced	4	4	Brazilian	UFLA	Brazil
201	CCF01-20	201	Advanced	4	4	Brazilian	UFLA	Brazil			GRO 1809	DGN 4002
202	GSI11-01	202	Advanced	4	4	Brazilian	UFLA	Brazil
203	CTB03-17	203	Advanced	4	4	Brazilian	UFLA	Brazil	Naturela	SR1 11-03
204	KCR02-03	204	Advanced	3	3	Brazilian	UFLA	Brazil
205	USP01-19	205	Advanced	2	3	Brazilian	UFLA	Brazil
207	USP01-24	207	Advanced	2	2	Brazilian	UFLA	Brazil
210	USP01-42	210	Advanced	4	4	Brazilian	UFLA	Brazil
211	USP01-06	211	Advanced	3	3	Brazilian	UFLA	Brazil
212	JUG02-20	212	Advanced	4	4	Brazilian	UFLA	Brazil	XY9	XY13
213	GSI12-31	213	Advanced	4	4	Brazilian	UFLA	Brazil
215	KCR03-02	215	Advanced	3	3	Brazilian	UFLA	Brazil
216	CCF32-07	216	Advanced	4	4	Brazilian	UFLA	Brazil			DGN 4002	Bacon Chipier
217	RPC04-20	217	Advanced	2	2	Brazilian	UFLA	Brazil	MLG 20-12	OGC 06-45
220	IND05-07	220	Advanced	4	4	Brazilian	UFLA	Brazil
221	RPC01-22	221	Advanced	2	2	Brazilian	UFLA	Brazil	MLG 02-12	OGC 06-45
222	USP-R-09	222	Advanced	4	4	Brazilian	USP	Brazil
223	CCF25-08	223	Advanced	4	4	Brazilian	UFLA	Brazil			DGN 4002	FL 2027
225	TSB03-14	225	Advanced	2	2	Brazilian	UFLA	Brazil
226	KCR02-12	226	Advanced	3	3	Brazilian	UFLA	Brazil
227	USP01-38	227	Advanced	3	3	Brazilian	UFLA	Brazil
228	RSV06-37	228	Advanced	4	4	Brazilian	UFLA	Brazil
229	GSI11-04	229	Advanced	4	4	Brazilian	UFLA	Brazil
230	CBM04-42	230	Advanced	3	4	Brazilian	UFLA	Brazil	Baronesa	LT 7
235	LCS09-31	235	Advanced	2	2	Brazilian	UFLA	Brazil
236	LCS14-37	236	Advanced	2	2	Brazilian	UFLA	Brazil
237	RSV20-04	237	Advanced	4	4	Brazilian	UFLA	Brazil
239	USP01-15	239	Advanced	2	2	Brazilian	UFLA	Brazil
240	LCS14-33	240	Advanced	3	3	Brazilian	UFLA	Brazil
242	IRF09-44	242	Advanced	2	2	Brazilian	UFLA	Brazil
243	KCR09-03	243	Advanced	3	3	Brazilian	UFLA	Brazil
244	RPC01-26	244	Advanced	2	2	Brazilian	UFLA	Brazil	MLG 02-12	OGC 06-45
245	KCR06-02	245	Advanced	3	3	Brazilian	UFLA	Brazil
247	SR2-29-01	247	Advanced	4	4	Brazilian	UFLA	Brazil
248	KCR01-01	248	Advanced	3	3	Brazilian	UFLA	Brazil
250	USP-R-10	250	Advanced	4	2	Brazilian	USP	Brazil
253	CMA-101	253	Advanced	3	3	Brazilian	UFLA	Brazil	OAS 3-30	JUG 2-20
254	KCR01-26	254	Advanced	3	3	Brazilian	UFLA	Brazil
255	GMR05-04	255	Advanced	2	2	Brazilian	UFLA	Brazil	SR2 35-05	Voyager
257	TSB12-16	257	Advanced	2	2	Brazilian	UFLA	Brazil
258	USP02-08	258	Advanced	4	4	Brazilian	UFLA	Brazil
260	USP01-09	260	Advanced	2	2	Brazilian	UFLA	Brazil
261	USP02-12	261	Advanced	4	4	Brazilian	UFLA	Brazil
262	USP01-23	262	Advanced	4	4	Brazilian	UFLA	Brazil
264	USP01-33	264	Advanced	2	2	Brazilian	UFLA	Brazil
267	USP02-07	267	Advanced	4	4	Brazilian	UFLA	Brazil
269	RPC01-49	269	Advanced	2	2	Brazilian	UFLA	Brazil	MLG 02-12	OGC 06-45
270	KCR02-08	270	Advanced	3	3	Brazilian	UFLA	Brazil
274	USP01-32	274	Advanced	3	3	Brazilian	UFLA	Brazil
275	LCS08-38	275	Advanced	2	2	Brazilian	UFLA	Brazil
277	ESL12-36	277	Advanced	4	4	Brazilian	UFLA	Brazil
278	SR3-33-14	278	Advanced	4	4	Brazilian	UFLA	Brazil
279	LCS28-35	279	Advanced	2	2	Brazilian	UFLA	Brazil
280	USP02-05	280	Advanced	4	4	Brazilian	UFLA	Brazil
281	USP02-01	281	Advanced	4	4	Brazilian	UFLA	Brazil
283	LCS15-22	283	Advanced	2	2	Brazilian	UFLA	Brazil
284	GMR22-18	284	Advanced	3	3	Brazilian	UFLA	Brazil
286	RPC01-14	286	Advanced	2	2	Brazilian	UFLA	Brazil	MLG 02-12	OGC 06-45
289	CMM01-12	289	Advanced	3	3	Brazilian	UFLA	Brazil
291	USP01-08	291	Advanced	2	2	Brazilian	UFLA	Brazil
292	LCS28-23	292	Advanced	2	2	Brazilian	UFLA	Brazil
295	LCS20-03	295	Advanced	2	2	Brazilian	UFLA	Brazil
296	LCS09-04	296	Advanced	2	2	Brazilian	UFLA	Brazil
298	USP01-07	298	Advanced	2	3	Brazilian	UFLA	Brazil
299	KCR02-07	299	Advanced	3	3	Brazilian	UFLA	Brazil
300	LCS31-17	300	Advanced	3	2	Brazilian	UFLA	Brazil
303	PRM03-48	303	Advanced	4	4	Brazilian	UFLA	Brazil
304	CCF05-09	304	Advanced	4	4	Brazilian	UFLA	Brazil			SR 10406	DGN 4002
308	SRI-04-06	308	Advanced	4	4	Brazilian	UFLA	Brazil
309	KCR01-22	309	Advanced	3	3	Brazilian	UFLA	Brazil
312	CTB32-26	312	Advanced	3	1	Brazilian	UFLA	Brazil	Monalisa	SR1 11-03
313	CMA-201	313	Advanced	2	2	Brazilian	UFLA	Brazil	OAS 3-30	JUG 2-20
314	CTB32-21	314	Advanced	3	3	Brazilian	UFLA	Brazil	Monalisa	SR1 11-03
316	USP01-41	316	Advanced	2	2	Brazilian	UFLA	Brazil
317	DSM04-01	317	Advanced	3	3	Brazilian	UFLA	Brazil
318	LCS21-14	318	Advanced	2	2	Brazilian	UFLA	Brazil
319	CMM01-61	319	Advanced	3	3	Brazilian	UFLA	Brazil
320	LCS08-20	320	Advanced	4	4	Brazilian	UFLA	Brazil
322	KCR08-07	322	Advanced	3	3	Brazilian	UFLA	Brazil
324	USP-R-11	324	Advanced	4	4	Brazilian	USP	Brazil
327	RPC04-02	327	Advanced	4	4	Brazilian	UFLA	Brazil	MLG 20-12	OGC 06-45
329	IND02-58	329	Advanced	4	4	Brazilian	UFLA	Brazil
330	IND07-59	330	Advanced	4	4	Brazilian	UFLA	Brazil
331	LCS07-21	331	Advanced	2	4	Brazilian	UFLA	Brazil
335	USP02-13	335	Advanced	4	4	Brazilian	UFLA	Brazil
337	KCR09-13	337	Advanced	3	3	Brazilian	UFLA	Brazil
338	USP02-11	338	Advanced	4	4	Brazilian	UFLA	Brazil
339	CBM24-06	339	Advanced	2	2	Brazilian	UFLA	Brazil	LT 9	DTO 28
340	KCR01-15	340	Advanced	3	3	Brazilian	UFLA	Brazil
342	USP01-20	342	Advanced	2	2	Brazilian	UFLA	Brazil
343	USP01-27	343	Advanced	4	4	Brazilian	UFLA	Brazil
344	LCS13-23	344	Advanced	3	3	Brazilian	UFLA	Brazil
345	CBM18-11	345	Advanced	4	4	Brazilian	UFLA	Brazil	DTO28	Aracy
346	RPC12-24	346	Advanced	2	2	Brazilian	UFLA	Brazil	MLG 23-24	OGC 06-69
347	CCF21-19	347	Advanced	4	4	Brazilian	UFLA	Brazil			DGN 4002	Atlantic
348	KCR01-02	348	Advanced	3	3	Brazilian	UFLA	Brazil
349	MOF05-04	349	Advanced	4	4	Brazilian	UFLA	Brazil	ESL 58	RVS 06-37
350	KCR11-01	350	Advanced	2	2	Brazilian	UFLA	Brazil
354	GMR03-54	354	Advanced	4	4	Brazilian	UFLA	Brazil	SR2 21-02	Voyager
355	RSV18-01	355	Advanced	4	4	Brazilian	UFLA	Brazil
356	KCR04-02	356	Advanced	4	4	Brazilian	UFLA	Brazil
357	GRO14-11	357	Advanced	4	4	Brazilian	UFLA	Brazil
359	CCF14-12	359	Advanced	4	4	Brazilian	UFLA	Brazil			FL2027	DGN2103
360	SR2-31-03	360	Advanced	4	4	Brazilian	UFLA	Brazil
361	CCF21-03	361	Advanced	4	4	Brazilian	UFLA	Brazil			DGN 4002	Atlantic
367	USP01-34	367	Advanced	4	4	Brazilian	UFLA	Brazil
369	CCF02-18	369	Advanced	4	4	Brazilian	UFLA	Brazil			DGN 2103	DGN 4002
371	RPC01-03	371	Advanced	2	2	Brazilian	UFLA	Brazil	MLG 02-12	OGC 06-45
372	CCF05-12	372	Advanced	2	2	Brazilian	UFLA	Brazil			SR 10406	DGN 4002
373	RPC01-25	373	Advanced	2	2	Brazilian	UFLA	Brazil	MLG 02-12	OGC 06-45
376	MOF05-22	376	Advanced	4	4	Brazilian	UFLA	Brazil	ESL 58	RVS 06-37
377	IRF09-35	377	Advanced	4	4	Brazilian	UFLA	Brazil
378	RPC01-09	378	Advanced	2	2	Brazilian	UFLA	Brazil	MLG 02-12	OGC 06-45
379	IND08-18	379	Advanced	2	2	Brazilian	UFLA	Brazil
380	USP02-40	380	Advanced	4	4	Brazilian	UFLA	Brazil
381	CMM01-41	381	Advanced	3	3	Brazilian	UFLA	Brazil
383	OAS03-30	383	Advanced	2	2	Brazilian	UFLA	Brazil	XY9	XY10
384	CMA-339	384	Advanced	2	2	Brazilian	UFLA	Brazil	OAS 3-30	JUG 2-20
386	KCR03-03	386	Advanced	3	3	Brazilian	UFLA	Brazil
387	KCR04-03	387	Advanced	3	3	Brazilian	UFLA	Brazil
390	LCS11-19	390	Advanced	2	2	Brazilian	UFLA	Brazil
392	GMR09-02	392	Advanced	4	4	Brazilian	UFLA	Brazil
394	KCR01-24	394	Advanced	2	2	Brazilian	UFLA	Brazil
398	GSI05-33	398	Advanced	4	4	Brazilian	UFLA	Brazil
403	GMR22-35	403	Advanced	3	3	Brazilian	UFLA	Brazil
405	KCR01-11	405	Advanced	3	3	Brazilian	UFLA	Brazil
407	RPC01-46	407	Advanced	2	2	Brazilian	UFLA	Brazil	MLG 02-12	OGC 06-45
409	Camila	409	Cultivar	4	4	Brazilian	EMBRAPA	Brazil			C1750-15-95	C1883-22-97	BRS F63
410	Sifra	410	Cultivar	3	3	Foreign	Foreign	Netherlands			Mondial	Robinta
411	Esmeralda	411	Cultivar	4	4	Foreign	Foreign	NA					Probably "Esmee" variety
416	USP02-04	416	Advanced	4	4	Brazilian	UFLA	Brazil
417	USP2020	417	Advanced	3	3	Brazilian	UFLA	Brazil
419	Russet_Burbank	419	Cultivar	1	1	Foreign	Foreign	United States				Mutant of Burbank	Russet Burbank
420	MOF02-03	420	Advanced	4	4	Brazilian	UFLA	Brazil	RVS 06-37	CBM 09-10
425	Ana	425	Cultivar	2	2	Brazilian	EMBRAPA	Brazil			C-1750-15-95	Asterix	BRS Ana
426	LCS23-17	426	Advanced	2	2	Brazilian	UFLA	Brazil
432	USP-R-12	432	Advanced	4	4	Brazilian	USP	Brazil
433	USP-R-13	433	Advanced	4	4	Brazilian	USP	Brazil
439	USP-R-14	439	Advanced	3	4	Brazilian	USP	Brazil
443	USP-R-15	443	Advanced	4	4	Brazilian	USP	Brazil					441
445	USP-R-16	445	Advanced	3	3	Brazilian	USP	Brazil
448	USP-R-17	448	Advanced	3	4	Brazilian	USP	Brazil
453	Palace	453	Cultivar	3	3	Foreign	Foreign	Netherlands			AR 01-3350	ADD 93-20902
454	Prince	454	Cultivar	3	3	Foreign	Foreign	Netherlands			ARG 96-0738	SW 98-2723
455	Edison	455	Cultivar	3	3	Foreign	Foreign	Germany			Diana	SA 03-363-1
457	Beyonce	457	Cultivar	3	3	Foreign	Foreign	Netherlands			AR 94-2061	Lady Jo
458	Bellanita	458	Cultivar	3	3	Foreign	Foreign	Netherlands			AR 97-1032	AR 97-0942
459	Antarctica	459	Cultivar	4	4	Foreign	Foreign	Ireland			Navan	Pentland Ivory
460	Alibaba	460	Cultivar	3	4	Foreign	Foreign	Ireland			Barna	T2277/50
461	Danique	461	Cultivar	3	3	Foreign	Foreign	Netherlands			AR 99-1184	AR 98-1009
462	Markies	462	Cultivar	3	3	Foreign	Foreign	Netherlands			Fianna	Agria
466	Polpa_Roxa	466	Advanced	4	4	Foreign	Foreign	NA
467	Polpa_Rosa	467	Advanced	4	4	Foreign	Foreign	NA
468	Michune_Negra	468	Cultivar?	3	4	Foreign	Foreign	Chile					Michuñe Negra
469	Laranja_2	469	Advanced	4	4	Foreign	Foreign	NA
470	Laranja_1	470	Advanced	4	4	Foreign	Foreign	NA
471	Turmalina	471	Cultivar	4	4	Brazilian	IAC	Brazil			Maria Bonita	Cruza 27	IAC Turmalina
472	Aracy	472	Cultivar	4	4	Brazilian	IAC	Brazil			Katahdim	Profijt	IAC-2
473	Aracy_Ruiva	473	Cultivar	3	3	Brazilian	IAC	Brazil			Aracy mutation	Aracy mutation	IAC 6364
474	Abaete	474	Cultivar	4	4	Brazilian	IAC	Brazil			622	Lory
475	Ibituacu	475	Cultivar	3	4	Brazilian	IAC	Brazil			IAC Jacy	G.52.64(1)
476	Itaiquara	476	Cultivar	3	4	Brazilian	IAC	Brazil			IAC 3052	Konsul	IAC 3551
477	Itarare	477	Cultivar	3	4	Brazilian	IAC	Brazil			Leo	IAC 5566	IAC 5986
478	Vitoria	478	Cultivar	3	4	Brazilian	IAC	Brazil			Ibituacu	Itarare
479	Axel	479	Cultivar	3	4	Brazilian	IAC	Brazil			Aracy Ruiva	Itarare
480	Frida	480	Cultivar	4	4	Brazilian	IAC	Brazil			Maria Bonita	Asterix
481	Granada	481	Cultivar	4	4	Brazilian	IAC	Brazil			CL 6-106	Quaresma
482	Rurik	482	Cultivar	4	4	Brazilian	IAC	Brazil			CL 6-17	Quaresma
483	CL.IAC_3.33	483	Advanced	4	4	Brazilian	IAC	Brazil			Aracy Ruiva	Itararé
485	CL.IAC_59.61	485	Advanced	4	4	Brazilian	IAC	Brazil			IAC 5603	S. grandarilasii (921)
486	CL.IAC_1.26	486	Advanced	3	4	Brazilian	IAC	Brazil			Caesar	Itarare
487	CL.IAC_2.135	487	Advanced	3	4	Brazilian	IAC	Brazil			Ibituaçu	Itarare
488	CL.IAC_3.11	488	Advanced	3	4	Brazilian	IAC	Brazil			Aracy Ruiva	Itarare
489	CL.IAC_21.54	489	Advanced	3	3	Brazilian	IAC	Brazil			CL 86	Ibituacu
490	CL.IAC_22.64	490	Advanced	4	4	Brazilian	IAC	Brazil			Aracy	Monte Bonito
491	CL.IAC_32.3	491	Advanced	3	4	Brazilian	IAC	Brazil			Ibituacu	Aracy
492	CL.IAC_297.1	492	Advanced	4	4	Brazilian	IAC	Brazil			Embrapa 2392	Cl 6-106
493	Inta_Serrana	493	Cultivar	4	4	Foreign	Foreign	Argentina			MPI 59703/21	B2.63	Serrana
494	Liseta	494	Cultivar	3	3	Foreign	Foreign	Netherlands			Spunta	VE 66-295
495	Monalisa	495	Cultivar	3	3	Foreign	Foreign	Netherlands			Bierma A 1 287	Colmo
496	Slaney	496	Cultivar	4	4	Foreign	Foreign	Ireland			Maris Page	Cara
497	Vivaldi	497	Cultivar	3	3	Foreign	Foreign	Netherlands			TZ 77 148	Monalisa
498	Panda_1	498	Cultivar	3	4	Foreign	Foreign	Germany			UP 0.351/17	W 6858/8
499	Omega	499	Cultivar	3	3	Foreign	Foreign	Germany			H 277/58	TONDRA	Ômega
500	Maria_Bonita	500	Cultivar	4	4	Foreign	Foreign	Peru			378015	PVY-pollenmixture
501	Fianna	501	Cultivar	3	3	Foreign	Foreign	Netherlands			KONST 62-660	AM 64-2
502	Felsina	502	Cultivar	3	3	Foreign	Foreign	Netherlands			Morene	Gloria
503	Baraka	503	Cultivar	3	4	Foreign	Foreign	Netherlands			SVP 50-358	Avenir
504	Unzen	504	Cultivar	3	3	Foreign	Foreign	Japan			Norin No.1	Katahdin
505	Barna	505	Cultivar	3	4	Foreign	Foreign	Ireland			Desiree	Cara
506	Mondial	506	Cultivar	3	3	Foreign	Foreign	Netherlands			Spunta	VE 66-295
507	Marijke	507	Cultivar	3	3	Foreign	Foreign	Netherlands			SVP M 194-10	MPI 19268
508	Turbo	508	Cultivar	3	3	Foreign	Foreign	Netherlands			SM 69-17	VE 74-45
509	Caesar	509	Cultivar	3	3	Foreign	Foreign	Netherlands			Monalisa	Rop B 1178
510	Bintje	510	Cultivar	3	3	Foreign	Foreign	Netherlands			Munstersen	Jaune D'Or
511	Carola	511	Cultivar	3	3	Foreign	Foreign	Germany			Weima	hybrid
512	Baronesa	512	Cultivar	4	4	Brazilian	EMBRAPA	Brazil				Loman selfing
513	Aziza	513	Cultivar	3	3	Foreign	Foreign	Netherlands			SM 69-17	VE 74-45
514	Darwina	514	Cultivar	3	3	Foreign	Foreign	Netherlands			Marijke	VTN 62-33-3
515	Kennebec	515	Cultivar	4	4	Foreign	Foreign	United States			USDA B 127	USDA 96-56
516	Lady_Roseta	516	Cultivar	3	2	Foreign	Foreign	Netherlands			Cardinal	VTN 62-33-3
517	Saudade_de_Minas	517	Historical	4	4	Foreign	Foreign	NA					Saudade de Minas
518	Lady_da_Vargem	518	Cultivar	3	2	Brazilian	IAC	Brazil
519	Grao_Mogol	519	Historical	3	4	Foreign	Foreign	NA					Grão Mogol
520	CL.IAC_367.3	520	Advanced	4	4	Brazilian	IAC	Brazil			Grao Mogol	CL 16-16
521	CL.IAC_19.44	521	Advanced	3	3	Brazilian	IAC	Brazil			Morene	Ibituacu
522	CL.IAC_37.6	522	Advanced	4	4	Brazilian	IAC	Brazil			Cl 6-106	Embrapa 2376
523	CL.IAC_113.31	523	Advanced	4	4	Brazilian	IAC	Brazil			Cl 6-106	Maria Bonita
524	CL.IAC_113.34	524	Advanced	4	4	Brazilian	IAC	Brazil			Cl 6-106	Maria Bonita
525	CL.IAC_116.65	525	Advanced	4	4	Brazilian	IAC	Brazil			Cl 6-106	Embrapa 2392
526	CL.IAC_90.65	526	Advanced	4	4	Brazilian	IAC	Brazil			Aracy Ruiva	Reiche
527	CL.IAC_139.36	527	Advanced	4	4	Brazilian	IAC	Brazil			Maria Bonita	Aracy Ruiva
528	CL.IAC_162.26	528	Advanced	4	4	Brazilian	IAC	Brazil			Embrapa 2392	Cl 6-106
529	CL.IAC_303.1	529	Advanced	4	4	Brazilian	IAC	Brazil			CIP I	Curumin
530	CL.IAC_26.31	530	Advanced	3	4	Brazilian	IAC	Brazil			Cl 6-17	Embrapa 2376
531	2_14	531	Advanced	1	1	Brazilian	USP	Brazil	LCS30-16	Russet Burbank
532	2_2	532	Advanced	1	1	Brazilian	USP	Brazil	LCS30-16	Russet Burbank
533	2_28	533	Advanced	1	1	Brazilian	USP	Brazil	LCS30-16	Russet Burbank
534	2_35	534	Advanced	1	1	Brazilian	USP	Brazil	LCS30-16	Russet Burbank
536	2_41	536	Advanced	1	1	Brazilian	USP	Brazil	LCS30-16	Russet Burbank
537	2_42	537	Advanced	1	1	Brazilian	USP	Brazil	LCS30-16	Russet Burbank
538	2_44	538	Advanced	1	1	Brazilian	USP	Brazil	LCS30-16	Russet Burbank
539	2_46	539	Advanced	1	1	Brazilian	USP	Brazil	LCS30-16	Russet Burbank
540	2_48	540	Advanced	1	1	Brazilian	USP	Brazil	LCS30-16	Russet Burbank
541	2_5	541	Advanced	1	1	Brazilian	USP	Brazil	LCS30-16	Russet Burbank
542	2_6	542	Advanced	1	1	Brazilian	USP	Brazil	LCS30-16	Russet Burbank
543	2_7	543	Advanced	1	1	Brazilian	USP	Brazil	LCS30-16	Russet Burbank
544	10_2	544	Advanced	2	2	Brazilian	USP	Brazil	LCS30-16	Ana
545	10_8	545	Advanced	2	2	Brazilian	USP	Brazil	LCS30-16	Ana
546	10_9	546	Advanced	2	2	Brazilian	USP	Brazil	LCS30-16	Ana
547	11_2	547	Advanced	4	4	Brazilian	USP	Brazil	Atlantic	USP02-07
548	11_8	548	Advanced	4	4	Brazilian	USP	Brazil	Atlantic	USP02-07
549	13_1	549	Advanced	1	1	Brazilian	USP	Brazil	Russet Burbank	Ana
551	14_7	551	Advanced	4	4	Brazilian	USP	Brazil	Atlantic	USP-R-11
552	18_1	552	Advanced	1	1	Brazilian	USP	Brazil	Russet Burbank	LCS07-21
553	18_3	553	Advanced	1	1	Brazilian	USP	Brazil	Russet Burbank	LCS07-21
554	22_3	554	Advanced	1	1	Brazilian	USP	Brazil	Russet Burbank	LCS14-33
555	23_10	555	Advanced	1	1	Brazilian	USP	Brazil	USP-R-18	Russet Burbank
556	23_12	556	Advanced	1	1	Brazilian	USP	Brazil	USP-R-18	Russet Burbank
557	23_15	557	Advanced	1	1	Brazilian	USP	Brazil	USP-R-18	Russet Burbank
558	23_18	558	Advanced	1	1	Brazilian	USP	Brazil	USP-R-18	Russet Burbank
559	23_2	559	Advanced	1	1	Brazilian	USP	Brazil	USP-R-18	Russet Burbank
561	23_24	561	Advanced	1	1	Brazilian	USP	Brazil	USP-R-18	Russet Burbank
562	23_27	562	Advanced	1	1	Brazilian	USP	Brazil	USP-R-18	Russet Burbank
563	23_3	563	Advanced	1	1	Brazilian	USP	Brazil	USP-R-18	Russet Burbank
564	23_34	564	Advanced	1	1	Brazilian	USP	Brazil	USP-R-18	Russet Burbank
565	23_35	565	Advanced	1	1	Brazilian	USP	Brazil	USP-R-18	Russet Burbank
566	23_36	566	Advanced	1	1	Brazilian	USP	Brazil	USP-R-18	Russet Burbank
567	23_4	567	Advanced	1	1	Brazilian	USP	Brazil	USP-R-18	Russet Burbank
568	23_5	568	Advanced	1	1	Brazilian	USP	Brazil	USP-R-18	Russet Burbank
569	23_6	569	Advanced	1	1	Brazilian	USP	Brazil	USP-R-18	Russet Burbank
570	23_7	570	Advanced	1	1	Brazilian	USP	Brazil	USP-R-18	Russet Burbank
571	23_8	571	Advanced	1	1	Brazilian	USP	Brazil	USP-R-18	Russet Burbank
572	24_1	572	Advanced	1	1	Brazilian	USP	Brazil	Russet Burbank	CTB32-26
573	24_2	573	Advanced	1	1	Brazilian	USP	Brazil	Russet Burbank	CTB32-26
574	24_3	574	Advanced	1	1	Brazilian	USP	Brazil	Russet Burbank	CTB32-26
575	24_4	575	Advanced	1	1	Brazilian	USP	Brazil	Russet Burbank	CTB32-26
576	24_5	576	Advanced	1	1	Brazilian	USP	Brazil	Russet Burbank	CTB32-26
577	30_1	577	Advanced	1	1	Brazilian	USP	Brazil	LCS08-20	Russet Burbank
578	30_3	578	Advanced	1	1	Brazilian	USP	Brazil	LCS08-20	Russet Burbank
579	30_4	579	Advanced	1	1	Brazilian	USP	Brazil	LCS08-20	Russet Burbank
580	30_7	580	Advanced	1	1	Brazilian	USP	Brazil	LCS08-20	Russet Burbank
581	30_8	581	Advanced	1	1	Brazilian	USP	Brazil	LCS08-20	Russet Burbank
585	32_23	585	Advanced	4	4	Brazilian	USP	Brazil	USP01-27	LCS07-21
586	32_28	586	Advanced	4	4	Brazilian	USP	Brazil	USP01-27	LCS07-21
587	32_30	587	Advanced	4	4	Brazilian	USP	Brazil	USP01-27	LCS07-21
588	32_32	588	Advanced	4	4	Brazilian	USP	Brazil	USP01-27	LCS07-21
589	32_34	589	Advanced	4	4	Brazilian	USP	Brazil	USP01-27	LCS07-21
590	32_36	590	Advanced	4	4	Brazilian	USP	Brazil	USP01-27	LCS07-21
591	32_39	591	Advanced	4	4	Brazilian	USP	Brazil	USP01-27	LCS07-21
592	32_42	592	Advanced	4	4	Brazilian	USP	Brazil	USP01-27	LCS07-21
594	4_2	594	Advanced	2	2	Brazilian	USP	Brazil	LCS08-20	Ana
595	4_33	595	Advanced	2	2	Brazilian	USP	Brazil	LCS08-20	Ana
597	43_2	597	Advanced	1	1	Brazilian	USP	Brazil	CMA-91	Russet Burbank
598	43_3	598	Advanced	4	4	Brazilian	USP	Brazil	CMA-91	Russet Burbank
599	43_4	599	Advanced	1	1	Brazilian	USP	Brazil	CMA-91	Russet Burbank
600	43_5	600	Advanced	1	1	Brazilian	USP	Brazil	CMA-91	Russet Burbank
601	44_1	601	Advanced	1	1	Brazilian	USP	Brazil	DMS01-20	Russet Burbank
602	44_10	602	Advanced	1	1	Brazilian	USP	Brazil	DMS01-20	Russet Burbank
603	44_12	603	Advanced	1	1	Brazilian	USP	Brazil	DMS01-20	Russet Burbank
604	44_4	604	Advanced	1	1	Brazilian	USP	Brazil	DMS01-20	Russet Burbank
606	44_6	606	Advanced	1	1	Brazilian	USP	Brazil	DMS01-20	Russet Burbank
607	44_7	607	Advanced	1	1	Brazilian	USP	Brazil	DMS01-20	Russet Burbank
608	47_35	608	Advanced	4	4	Brazilian	USP	Brazil	USP-R-11	CCF27-15
612	47_55	612	Advanced	1	1	Brazilian	USP	Brazil	USP-R-11	CCF27-15
613	48_13	613	Advanced	1	1	Brazilian	USP	Brazil	CMB09-10	Russet Burbank
614	48_14	614	Advanced	1	1	Brazilian	USP	Brazil	CMB09-10	Russet Burbank
615	48_15	615	Advanced	1	1	Brazilian	USP	Brazil	CMB09-10	Russet Burbank
616	48_2_1	616	Advanced	1	1	Brazilian	USP	Brazil	CMB09-10	Russet Burbank
618	Panda_2	618	Advanced	3	4	Foreign	Foreign	NA
620	48_21	620	Advanced	1	1	Brazilian	USP	Brazil	CMB09-10	Russet Burbank
621	48_22	621	Advanced	1	1	Brazilian	USP	Brazil	CMB09-10	Russet Burbank
622	48_26	622	Advanced	1	1	Brazilian	USP	Brazil	CMB09-10	Russet Burbank
623	48_31	623	Advanced	1	1	Brazilian	USP	Brazil	CMB09-10	Russet Burbank
624	48_32	624	Advanced	1	1	Brazilian	USP	Brazil	CMB09-10	Russet Burbank
625	48_33	625	Advanced	1	1	Brazilian	USP	Brazil	CMB09-10	Russet Burbank
626	48_36	626	Advanced	1	1	Brazilian	USP	Brazil	CMB09-10	Russet Burbank
627	48_37	627	Advanced	1	1	Brazilian	USP	Brazil	CMB09-10	Russet Burbank
628	48_6	628	Advanced	1	1	Brazilian	USP	Brazil	CMB09-10	Russet Burbank
629	48_9	629	Advanced	1	1	Brazilian	USP	Brazil	CMB09-10	Russet Burbank
630	50_101	630	Advanced	2	2	Brazilian	USP	Brazil	USP01-39	USP-R-11
631	50_104	631	Advanced	2	2	Brazilian	USP	Brazil	USP01-39	USP-R-11
632	50_106	632	Advanced	2	2	Brazilian	USP	Brazil	USP01-39	USP-R-11
633	50_107	633	Advanced	2	2	Brazilian	USP	Brazil	USP01-39	USP-R-11
634	50_110	634	Advanced	2	2	Brazilian	USP	Brazil	USP01-39	USP-R-11
635	50_13	635	Advanced	2	2	Brazilian	USP	Brazil	USP01-39	USP-R-11
636	50_139	636	Advanced	2	2	Brazilian	USP	Brazil	USP01-39	USP-R-11
637	50_33	637	Advanced	2	2	Brazilian	USP	Brazil	USP01-39	USP-R-11
638	50_39	638	Advanced	2	2	Brazilian	USP	Brazil	USP01-39	USP-R-11
639	50_5	639	Advanced	2	2	Brazilian	USP	Brazil	USP01-39	USP-R-11
640	50_73	640	Advanced	2	2	Brazilian	USP	Brazil	USP01-39	USP-R-11
641	50_75	641	Advanced	2	2	Brazilian	USP	Brazil	USP01-39	USP-R-11
642	50_76	642	Advanced	2	2	Brazilian	USP	Brazil	USP01-39	USP-R-11
643	50_81	643	Advanced	2	2	Brazilian	USP	Brazil	USP01-39	USP-R-11
644	50_82	644	Advanced	2	2	Brazilian	USP	Brazil	USP01-39	USP-R-11
645	50_85	645	Advanced	2	2	Brazilian	USP	Brazil	USP01-39	USP-R-11
646	50_90	646	Advanced	2	2	Brazilian	USP	Brazil	USP01-39	USP-R-11
647	50_95	647	Advanced	2	2	Brazilian	USP	Brazil	USP01-39	USP-R-11
648	50_98	648	Advanced	2	2	Brazilian	USP	Brazil	USP01-39	USP-R-11
651	71_5	651	Advanced	4	4	Brazilian	USP	Brazil	LCS08-20	USP-R-18
652	71_9	652	Advanced	4	4	Brazilian	USP	Brazil	LCS08-20	USP-R-18

## Sheet: Supplementary Table S2
Supplementary Table S2. Four hundred fifteen clones genotyped using 22K Flex-Seq (after filtering), chromosome, positions and their correspondencies.
snp_ID	CHROM	POS	Correspondency	USP01-05	KRC08-08	LCS10-15	USP-R-01	CBM19-39	CCF11-05	LCS22-10	RPC04-49	USP01-16	MOF01-11	GSI06-03	RPC01-18	LCS03-37	TSB11-04	GRO14-17	NES08-74	CCF24-25	KCR08-06	TSB07-04	LCS28-25	GRO21-42	LCS06-03	Agata	KCR01-12	USP02-09	KCR08-05	NES07-150	USP01-21	KCR01-10	USP01-43	USP01-10	CBM19-11	CMM01-33	KCR03-04	Atlantic	KCR01-20	Asterix	USP02-15	USP-R-02	RPC01-43	SR3-32-16	SR2-24-03	GMR08-22	KCR09-05	CTB39-13	USP01-35
chr01_432462	chr01	432462	candidate_SNP:432461-432462	3	4	4	4	2	4	3	4	4	3	4	4	4	4	4	4	4	4	4	4	4	4	4	4	4	4	NA	4	4	4	4	4	2	4	4	4	3	3	3	4	4	4	4	4	4	3
chr01_449027	chr01	449027	solcap_snp_c2_51460	3	1	4	1	3	1	2	2	2	1	2	3	4	0	2	1	4	0	2	4	3	3	2	2	3	1	4	2	4	4	4	0	3	2	3	2	2	3	1	1	2	4	4	3	2	3
chr01_485600	chr01	485600	candidate_SNP:485599-485600	4	3	4	4	4	4	4	4	4	4	4	4	4	4	4	4	4	4	4	4	4	4	4	4	4	4	4	4	3	4	4	4	4	4	4	3	4	4	4	4	4	4	4	4	4	4
chr01_508800	chr01	508800	solcap_snp_c2_36608	4	4	3	3	2	3	4	3	3	1	3	3	4	2	3	3	1	1	3	2	2	4	4	2	4	2	1	2	2	2	3	1	3	4	3	2	4	4	3	3	4	2	2	3	2	4
chr01_510745	chr01	510745	solcap_snp_c2_36615	4	4	2	3	2	2	4	4	3	2	2	4	4	2	3	4	1	2	1	1	2	3	4	3	4	3	0	1	3	3	4	3	3	4	2	2	4	4	1	4	4	3	2	3	3	4
chr01_518398	chr01	518398	candidate_SNP:518397-518398	2	0	2	1	1	1	2	1	1	1	1	2	2	0	0	2	1	0	1	1	1	2	1	0	2	2	1	1	2	2	2	1	1	3	1	0	2	2	0	1	2	2	2	3	1	2
chr01_527068	chr01	527068	solcap_snp_c2_36658	3	1	4	2	3	3	3	3	2	3	3	3	4	1	2	2	4	3	3	4	3	3	2	3	2	3	4	3	4	4	4	3	3	3	3	3	3	3	2	2	2	4	4	2	3	3
chr01_535192	chr01	535192	candidate_SNP:535191-535192	4	3	4	4	4	4	4	4	4	4	4	4	4	4	4	4	4	4	4	4	4	3	4	3	4	4	4	4	3	4	4	4	4	4	4	2	3	4	4	4	4	4	4	4	4	4
chr01_543731	chr01	543731	ST4.03ch01_286063	1	4	2	4	3	3	3	3	3	3	3	2	1	4	3	4	3	4	3	3	3	1	3	4	2	4	4	3	4	2	2	4	2	4	2	4	3	1	3	4	4	2	3	2	2	1
chr01_549584	chr01	549584	candidate_SNP:549583-549584	4	4	4	4	4	4	4	4	4	4	4	4	4	4	4	4	4	4	4	4	4	4	3	4	4	4	4	4	4	4	4	4	4	4	4	4	4	4	4	4	4	4	4	4	4	4
chr01_557591	chr01	557591	candidate_SNP:557590-557591	0	0	0	0	0	0	0	0	0	0	1	0	1	0	0	0	0	0	0	0	0	2	0	0	1	0	0	0	0	0	0	0	0	0	0	0	0	0	0	0	0	1	0	1	1	0
chr01_559038	chr01	559038	ST4.03ch01_301408	2	1	3	2	3	2	2	3	2	3	3	3	3	1	2	2	2	3	2	3	3	2	2	3	2	3	4	2	4	4	4	3	3	2	3	3	2	3	2	2	2	4	4	3	3	2
chr01_566972	chr01	566972	solcap_snp_c1_10930	2	2	3	2	3	2	3	2	2	2	3	3	3	1	2	3	2	3	2	3	2	2	2	1	2	2	2	2	3	4	4	2	2	3	2	3	3	3	2	2	2	4	4	4	3	2
chr01_583727	chr01	583727	candidate_SNP:583726-583727	1	2	1	1	0	1	2	0	1	0	0	1	1	0	1	1	2	0	0	0	0	1	1	2	1	1	0	0	2	2	1	0	1	0	1	2	1	2	1	1	1	2	0	1	2	1
chr01_592751	chr01	592751	candidate_SNP:592750-592751	4	4	4	3	4	4	3	4	4	4	4	4	4	4	4	3	4	4	4	4	4	4	4	4	4	3	3	4	3	4	4	4	4	3	4	4	3	4	4	4	3	4	4	4	4	4
chr01_602954	chr01	602954	PotVar0120130	4	3	2	2	3	4	2	4	3	3	3	4	3	3	4	3	3	3	2	1	3	4	4	2	4	2	1	3	0	2	3	4	4	1	4	2	2	4	3	4	3	3	1	4	3	3
chr01_603270	chr01	603270	PotVar0120099	4	4	3	2	2	2	4	3	3	2	3	3	4	3	3	2	3	1	4	1	3	4	4	3	4	1	3	2	3	4	4	1	4	4	4	2	4	4	3	3	4	1	2	3	2	4
chr01_641866	chr01	641866	solcap_snp_c2_36617	2	4	4	3	2	3	4	3	4	3	4	3	3	4	4	3	3	4	4	4	4	3	4	4	2	3	3	4	3	2	2	4	2	1	3	4	2	1	2	4	3	2	3	3	3	2
chr01_663157	chr01	663157	candidate_SNP:663156-663157	3	1	3	2	3	3	1	2	1	3	2	4	1	0	1	2	1	2	1	3	1	1	3	2	1	3	2	4	3	4	4	2	2	3	3	2	2	3	2	2	3	4	4	3	3	3
chr01_681775	chr01	681775	PotVar0120067	4	4	4	4	4	4	4	4	4	3	4	4	4	4	4	2	4	3	3	3	3	4	4	1	4	4	3	3	4	3	3	3	4	4	3	2	4	4	3	4	4	3	3	3	4	4
chr01_717629	chr01	717629	solcap_snp_c2_36639	4	4	3	3	2	3	4	3	3	2	2	2	4	3	2	2	3	1	2	1	3	4	3	2	4	1	2	1	3	3	4	2	3	4	3	2	3	4	3	3	4	3	1	2	3	4
chr01_718236	chr01	718236	PotVar0120022	4	3	4	4	4	4	4	4	4	4	4	4	4	4	4	4	4	4	4	4	4	4	4	4	4	4	4	4	4	4	4	4	4	4	4	4	3	4	4	4	4	4	4	4	4	4
chr01_719233	chr01	719233	PotVar0119989	4	4	3	4	4	4	3	4	4	4	4	4	4	4	4	4	4	4	3	4	4	4	3	4	4	4	4	4	4	3	3	4	4	4	4	4	3	4	4	4	4	4	4	4	4	4
chr01_723752	chr01	723752	solcap_snp_c2_36640	4	4	3	3	2	3	4	3	3	3	3	3	3	3	2	3	3	3	2	1	3	4	4	1	4	2	3	1	3	3	2	3	4	4	4	3	3	4	3	2	4	2	2	4	3	4
chr01_732790	chr01	732790	candidate_SNP:732789-732790	2	0	1	0	1	1	0	1	1	1	1	2	2	0	1	0	1	0	0	0	1	2	2	0	2	0	0	0	0	2	2	0	2	0	2	0	1	3	1	1	0	2	0	2	2	2
chr01_743630	chr01	743630	solcap_snp_c1_10918	4	4	3	3	2	3	4	3	3	2	3	3	4	2	3	2	3	1	3	2	3	4	4	2	4	2	3	3	3	3	3	2	3	4	3	2	4	4	3	3	4	2	3	3	2	3
chr01_746386	chr01	746386	candidate_SNP:746385-746386	2	4	3	2	1	3	2	3	4	3	3	4	2	4	4	3	3	2	2	2	2	3	4	2	4	2	1	2	1	1	1	1	2	4	3	2	3	2	3	2	4	2	1	3	4	2
chr01_747188	chr01	747188	candidate_SNP:747187-747188	3	4	4	4	3	4	4	4	4	3	4	4	4	4	4	4	4	4	4	4	4	NA	4	4	4	4	4	4	4	3	3	4	3	4	4	4	4	3	3	3	4	4	4	4	4	3
chr01_763010	chr01	763010	solcap_snp_c2_36647	2	1	2	2	1	2	2	2	2	1	1	2	2	1	2	2	2	1	1	1	2	2	2	1	3	2	2	1	1	2	2	1	1	2	2	1	3	3	1	2	3	3	1	2	3	3
chr01_795199	chr01	795199	candidate_SNP:795198-795199	1	0	1	0	0	0	0	0	1	0	1	2	1	0	1	0	0	0	0	0	1	0	1	0	2	0	0	0	0	1	1	0	0	0	2	0	2	0	0	1	1	2	0	2	1	1
chr01_808487	chr01	808487	solcap_snp_c2_36661	2	2	2	2	2	2	2	2	2	2	2	2	2	2	2	2	2	2	2	2	2	2	2	2	2	2	2	2	2	2	2	2	2	2	2	2	2	2	2	2	2	2	2	2	3	2
chr01_809732	chr01	809732	solcap_snp_c2_36665	1	2	2	1	0	0	1	0	1	0	1	3	3	0	1	1	0	0	1	0	2	2	0	0	2	0	0	0	0	1	1	0	0	0	2	0	2	0	0	1	2	2	1	2	2	1
chr01_823995	chr01	823995	candidate_SNP:823994-823995	1	1	3	2	2	2	2	2	2	1	3	3	3	1	2	2	2	2	1	3	2	2	1	2	2	3	3	2	3	3	3	3	0	2	3	2	2	2	1	2	2	4	4	3	3	1
chr01_824850	chr01	824850	solcap_snp_c1_10922	4	4	2	3	2	3	3	3	3	3	2	3	3	3	3	3	3	1	2	1	3	4	4	2	4	2	2	2	2	3	2	1	4	4	3	2	4	4	3	3	4	2	1	3	3	4
chr01_834292	chr01	834292	solcap_snp_c2_36672	4	4	4	4	3	4	4	4	4	4	4	4	4	4	4	4	4	4	4	4	4	4	4	4	4	4	4	4	4	4	4	4	4	4	3	4	4	4	4	4	4	4	3	4	4	4
chr01_835137	chr01	835137	candidate_SNP:835136-835137	1	0	1	1	0	1	0	1	1	0	0	1	1	0	1	1	1	0	0	0	2	1	1	0	2	1	1	0	1	1	1	0	0	2	1	0	1	2	0	1	2	2	0	1	1	1
chr01_836956	chr01	836956	solcap_snp_c2_36675	1	0	1	1	0	1	0	1	1	0	0	1	1	0	1	1	1	0	0	0	1	1	1	0	1	1	1	0	1	1	1	0	0	2	1	0	1	1	0	1	1	1	0	1	2	1
chr01_839144	chr01	839144	candidate_SNP:839143-839144	4	4	4	3	4	4	3	4	4	4	4	4	4	4	4	3	4	4	4	4	4	4	4	4	4	4	4	4	4	3	4	4	4	4	4	4	3	4	4	4	4	4	4	4	4	4
chr01_851175	chr01	851175	candidate_SNP:851174-851175	3	2	2	0	3	1	0	1	3	4	0	4	2	1	1	0	4	2	0	1	2	2	1	0	3	2	4	0	0	3	1	4	0	3	4	0	2	2	1	3	1	3	2	3	1	3
chr01_898058	chr01	898058	candidate_SNP:898057-898058	1	0	1	0	0	0	1	0	1	0	0	1	1	0	1	0	0	0	0	0	1	1	1	0	1	0	0	0	0	1	1	0	0	0	2	0	1	0	0	1	1	2	1	2	1	1
chr01_935978	chr01	935978	candidate_SNP:935977-935978	1	0	0	1	0	0	0	0	2	0	0	1	1	0	1	1	0	0	0	0	2	0	1	0	1	1	0	1	0	3	3	0	0	2	1	0	1	1	0	2	2	2	0	1	2	0
chr01_986977	chr01	986977	solcap_snp_c2_54804	4	4	4	4	4	4	4	4	3	4	4	3	4	4	3	4	4	4	4	4	4	4	3	4	4	4	4	4	4	4	4	4	4	4	3	4	3	4	4	2	4	4	3	4	4	4
chr01_986987	chr01	986987	solcap_snp_c2_54803	4	4	3	3	4	3	4	4	2	4	2	1	4	4	3	3	3	4	3	4	4	3	3	4	3	3	3	4	3	4	4	4	4	2	1	4	2	1	4	2	3	4	3	3	1	4
chr01_992483	chr01	992483	solcap_snp_c2_54797	2	1	2	2	3	2	1	2	1	2	2	1	2	1	1	2	2	3	2	3	1	1	0	2	2	3	3	2	3	4	4	3	2	2	1	2	1	3	2	3	1	2	2	2	2	2
chr01_1122653	chr01	1122653	solcap_snp_c2_6755	4	4	3	3	2	3	4	2	3	3	2	3	4	3	3	3	2	1	3	2	3	4	4	2	4	2	3	2	2	3	3	2	4	4	2	2	4	4	3	3	4	2	2	3	3	4
chr01_1133401	chr01	1133401	solcap_snp_c1_2425	2	2	3	2	3	2	2	2	2	2	3	3	3	2	2	3	3	3	2	3	2	2	2	3	2	2	3	2	3	4	4	3	2	2	3	1	2	3	1	2	2	4	4	3	3	2
chr01_1146213	chr01	1146213	solcap_snp_c2_6759	0	1	2	1	2	2	2	2	1	2	2	4	3	0	2	1	1	2	0	1	2	2	2	0	1	2	3	0	4	4	4	0	3	2	2	0	2	3	2	2	2	4	4	3	3	2
chr01_1156799	chr01	1156799	candidate_SNP:1156798-1156799	4	4	4	3	2	3	4	3	2	3	3	4	4	3	3	3	3	1	4	0	3	4	3	1	4	2	2	1	2	3	3	1	4	4	2	1	4	4	3	3	4	3	1	4	3	4
chr01_1171602	chr01	1171602	solcap_snp_c2_6767	2	4	4	3	3	3	2	2	3	3	4	3	3	4	3	3	3	4	4	4	3	3	2	4	2	3	3	4	3	3	3	4	2	2	2	4	3	2	3	3	2	2	3	3	3	2
chr01_1173327	chr01	1173327	solcap_snp_c2_6768	3	3	3	3	2	3	2	3	3	3	2	2	1	4	3	3	3	4	4	4	3	2	3	4	2	3	3	4	2	1	3	4	2	2	3	4	1	1	4	2	2	1	3	2	2	2
chr01_1173926	chr01	1173926	solcap_snp_c2_6769	2	2	2	2	3	3	2	1	2	2	3	3	3	2	2	3	2	3	2	3	2	2	2	2	2	3	3	2	3	4	4	2	2	2	3	2	3	2	2	3	2	4	4	3	3	2
chr01_1177430	chr01	1177430	solcap_snp_c1_2426	4	4	3	3	2	3	4	3	3	3	2	3	4	3	3	3	3	1	3	1	3	4	3	2	4	2	2	2	2	3	3	2	4	4	3	2	4	4	3	3	4	2	1	3	3	4
chr01_1181722	chr01	1181722	solcap_snp_c2_6779	1	0	1	0	1	2	0	0	1	0	0	2	3	0	2	0	1	1	1	0	1	2	1	0	2	0	0	0	0	0	0	0	0	0	2	0	1	2	1	2	1	2	2	1	1	1
chr01_1183943	chr01	1183943	candidate_SNP:1183942-1183943	0	0	0	0	0	2	0	2	1	0	0	1	0	0	1	0	3	0	1	0	1	0	1	0	2	0	0	0	0	1	0	1	0	0	0	0	0	3	0	0	0	0	0	1	3	0
chr01_1191971	chr01	1191971	candidate_SNP:1191970-1191971	4	4	3	4	2	4	3	3	3	3	2	3	3	3	3	2	4	1	2	0	3	4	3	2	4	3	2	2	2	2	1	3	4	4	3	3	4	4	2	2	4	2	2	3	3	4
chr01_1219194	chr01	1219194	candidate_SNP:1219193-1219194	4	3	4	3	3	4	4	4	3	4	4	4	4	4	4	4	4	2	2	4	4	4	3	2	4	3	4	3	2	2	3	4	4	4	4	3	3	4	4	4	4	3	2	4	3	4
chr01_1228799	chr01	1228799	candidate_SNP:1228798-1228799	4	3	4	4	4	4	4	4	4	4	4	4	4	4	4	4	4	4	4	4	4	4	4	4	4	4	4	4	4	4	4	4	4	4	4	4	4	4	4	4	4	4	4	4	4	4
chr01_1244279	chr01	1244279	solcap_snp_c2_54816	4	4	4	4	4	4	4	4	4	4	3	4	4	4	4	4	4	4	4	4	4	3	4	4	4	4	4	4	4	4	4	4	4	4	4	4	4	4	4	4	4	4	4	4	4	4
chr01_1255975	chr01	1255975	PotVar0071846	2	1	1	0	0	1	0	1	2	0	1	3	1	0	2	0	1	0	0	0	0	2	0	0	2	0	0	0	0	2	1	0	0	0	3	0	1	1	0	1	1	2	1	2	1	0
chr01_1256142	chr01	1256142	PotVar0071852	2	4	3	4	4	4	4	4	3	4	3	2	3	4	2	4	4	4	4	4	3	2	4	4	3	4	4	4	4	4	4	4	4	4	2	4	3	4	4	3	3	1	4	2	3	4
chr01_1258756	chr01	1258756	PotVar0071937	4	4	4	4	4	4	4	4	4	4	2	4	3	4	4	4	4	4	4	4	4	3	4	4	4	4	4	4	4	4	4	4	4	4	4	4	4	4	4	4	4	4	4	4	4	4
chr01_1259087	chr01	1259087	PotVar0071966	2	1	3	1	2	2	2	2	1	2	3	3	3	1	2	1	2	2	1	3	2	2	1	1	2	2	3	1	2	3	3	2	2	2	3	1	3	3	2	3	2	2	3	3	2	2
chr01_1326388	chr01	1326388	candidate_SNP:1326387-1326388	4	4	4	4	4	4	4	4	4	3	4	4	4	4	4	4	4	4	4	4	4	4	4	4	4	4	4	4	4	3	4	4	3	4	4	4	2	4	4	3	4	4	4	4	4	3
chr01_1348741	chr01	1348741	candidate_SNP:1348740-1348741	0	0	0	2	1	0	0	0	1	0	0	1	0	0	0	1	0	2	1	0	0	0	1	1	0	0	0	1	0	1	1	0	0	0	0	2	0	0	0	0	0	2	1	0	0	0
chr01_1367988	chr01	1367988	candidate_SNP:1367987-1367988	2	2	4	1	1	4	4	4	2	3	3	3	2	2	2	2	4	3	1	4	2	1	1	2	2	1	2	1	2	3	3	3	0	3	3	2	2	4	2	3	2	2	3	2	2	1
chr01_1377573	chr01	1377573	candidate_SNP:1377572-1377573	1	3	2	1	3	2	1	1	2	2	3	3	1	3	3	2	1	3	4	3	3	2	3	3	2	2	4	3	2	2	3	4	1	1	2	3	1	0	3	2	2	4	3	3	2	2
chr01_1409715	chr01	1409715	solcap_snp_c2_6793	4	3	3	4	4	2	4	2	3	4	4	3	4	4	3	4	3	4	4	4	3	4	3	4	3	4	4	4	4	4	4	4	4	4	3	4	4	1	4	3	4	4	4	3	2	4
chr01_1497589	chr01	1497589	candidate_SNP:1497588-1497589	4	4	4	4	4	4	4	4	4	4	4	4	3	4	4	4	4	4	4	4	4	3	4	4	4	4	4	4	4	4	4	4	4	4	4	4	4	4	4	4	4	4	4	4	4	4
chr01_1503163	chr01	1503163	candidate_SNP:1503162-1503163	4	3	3	4	4	4	4	4	3	4	4	3	4	4	3	4	4	4	4	4	3	4	3	4	4	4	4	4	4	4	4	4	4	4	3	4	4	4	4	3	4	4	4	3	2	4
chr01_1512070	chr01	1512070	ST4.03ch01_1417105	4	4	3	4	4	4	4	4	4	4	4	3	4	4	3	4	4	4	4	4	3	4	3	4	4	4	4	4	4	4	4	4	4	4	3	4	4	4	4	3	4	4	4	3	3	4
chr01_1579114	chr01	1579114	ST4.03ch01_1487393	4	4	4	3	3	4	3	4	4	3	4	2	3	4	4	3	4	4	4	4	3	3	4	4	4	3	4	4	4	3	3	4	3	2	4	4	3	3	3	3	3	4	4	4	4	3
chr01_1616798	chr01	1616798	candidate_SNP:1616797-1616798	4	4	2	4	2	4	3	3	3	3	3	3	3	3	3	4	3	2	4	2	2	4	3	2	4	3	3	2	2	2	2	2	4	3	3	3	4	4	4	3	3	3	1	3	3	4
chr01_1630160	chr01	1630160	ST4.03ch01_1541134	4	4	2	4	3	3	3	3	4	3	2	3	3	3	3	4	3	2	3	1	3	4	4	3	4	2	2	4	3	3	3	2	4	4	3	2	4	4	3	3	3	3	1	3	4	4
chr01_1644793	chr01	1644793	candidate_SNP:1644792-1644793	4	4	4	4	4	4	4	4	3	4	4	3	4	4	4	4	4	4	4	4	3	4	3	4	4	4	4	4	4	4	4	4	4	4	3	4	4	4	4	3	4	4	4	4	4	4
chr01_1692123	chr01	1692123	solcap_snp_c2_6906	4	4	4	4	4	4	4	4	4	4	4	3	4	4	4	4	4	4	4	4	3	4	3	4	4	4	4	4	4	4	4	4	4	4	3	4	4	4	4	3	4	4	4	4	4	4
chr01_1692794	chr01	1692794	candidate_SNP:1692793-1692794	3	2	4	3	3	4	4	4	2	3	3	3	3	3	1	4	4	4	2	4	3	2	3	3	2	3	1	3	3	4	4	4	2	4	4	2	3	4	1	1	4	3	4	1	1	2
chr01_1703192	chr01	1703192	candidate_SNP:1703191-1703192	2	2	2	2	1	3	2	3	1	2	1	2	2	1	0	2	2	1	1	1	2	2	2	1	2	2	0	1	0	2	3	1	2	3	2	1	3	4	1	2	2	0	0	2	2	2
chr01_1762455	chr01	1762455	ST4.03ch01_1678013	4	4	2	3	2	3	3	3	3	3	2	3	3	3	3	3	3	1	3	1	3	4	3	2	4	2	2	2	1	3	3	2	4	3	3	2	3	4	3	3	2	2	0	2	3	4
chr01_1766395	chr01	1766395	candidate_SNP:1766394-1766395	4	4	4	4	4	4	4	4	4	4	4	4	4	4	4	4	4	4	4	4	4	4	4	4	4	4	4	4	4	4	3	4	4	4	3	4	4	4	4	4	4	4	4	4	4	4
chr01_1804792	chr01	1804792	candidate_SNP:1804791-1804792	4	4	3	4	3	3	3	3	3	3	4	2	3	4	4	4	4	4	4	4	3	4	2	4	4	4	4	4	4	3	3	4	3	4	3	4	3	3	3	2	4	4	4	3	3	3
chr01_1819974	chr01	1819974	candidate_SNP:1819973-1819974	0	0	3	1	1	2	2	3	1	1	0	2	0	0	0	1	0	0	0	0	2	0	1	0	0	2	0	0	0	2	4	0	2	2	3	0	2	2	1	3	1	0	NA	1	1	1
chr01_1821599	chr01	1821599	candidate_SNP:1821598-1821599	4	3	1	3	3	3	3	3	4	3	0	3	3	2	2	2	2	1	3	1	3	4	4	3	4	3	2	4	3	2	3	1	2	4	3	2	4	4	1	2	1	2	0	3	4	4
chr01_1844266	chr01	1844266	solcap_snp_c2_6965	2	2	1	1	2	1	1	2	3	1	0	3	2	2	2	1	0	0	2	0	3	2	3	1	2	2	2	0	1	2	1	1	2	2	2	1	3	2	3	3	1	1	0	3	2	3
chr01_1863918	chr01	1863918	candidate_SNP:1863917-1863918	3	2	0	1	0	2	2	1	2	2	0	0	0	2	0	3	1	1	0	0	0	0	0	1	1	0	0	0	0	2	3	0	1	2	0	1	2	1	0	0	1	0	0	0	0	0
chr01_1882181	chr01	1882181	ST4.03ch01_1804031	3	2	1	1	0	3	2	3	1	1	0	0	0	1	0	3	2	1	1	2	1	1	1	2	3	0	0	1	0	2	1	1	1	2	2	2	3	4	0	0	1	0	0	0	3	1
chr01_1905861	chr01	1905861	solcap_snp_c2_6683	4	3	3	3	4	3	3	3	4	3	1	2	3	3	3	3	3	2	3	2	4	4	3	3	4	3	3	4	2	3	3	2	3	4	3	3	4	4	3	3	3	2	0	3	3	4
chr01_1908791	chr01	1908791	candidate_SNP:1908790-1908791	1	1	0	1	3	0	0	0	3	1	0	2	1	1	3	1	0	1	0	1	3	1	2	2	1	2	2	3	3	0	0	2	1	1	1	2	1	0	1	1	1	2	0	2	1	1
chr01_1916269	chr01	1916269	solcap_snp_c1_2417	4	3	3	3	4	3	3	3	4	3	1	3	3	3	3	3	3	2	3	2	4	4	3	3	4	3	2	4	3	3	3	3	3	4	3	3	4	4	3	3	3	2	0	3	3	4
chr01_1916800	chr01	1916800	candidate_SNP:1916799-1916800	3	3	4	4	2	4	4	4	3	3	4	3	2	3	2	4	4	4	4	3	3	2	3	3	3	3	2	3	3	4	4	2	3	4	4	3	3	4	3	4	4	2	4	2	2	3
chr01_1975000	chr01	1975000	ST4.03ch01_1897584	1	1	0	1	2	0	0	0	2	1	0	2	1	3	2	1	0	1	0	1	2	2	1	2	1	2	2	2	3	0	0	1	1	1	2	1	1	0	1	1	1	3	0	1	2	1
chr01_1979185	chr01	1979185	candidate_SNP:1979184-1979185	4	4	4	3	3	4	4	4	3	4	4	4	4	4	4	3	4	3	4	4	4	4	4	3	4	3	4	2	2	4	4	4	4	3	4	3	4	4	4	4	3	4	4	4	4	4
chr01_1986620	chr01	1986620	ST4.03ch01_1909204	4	3	2	3	4	3	3	3	4	3	1	3	3	3	3	3	3	2	3	2	4	4	3	3	4	3	1	4	3	3	3	3	3	4	3	3	3	4	3	3	3	2	0	2	3	4
chr01_1986674	chr01	1986674	ST4.03ch01_1909258	4	3	2	3	4	3	3	3	4	3	1	3	3	3	3	3	3	2	3	2	4	4	3	3	4	3	2	4	3	3	3	3	3	4	3	3	3	4	3	3	3	2	0	2	3	4
chr01_1994147	chr01	1994147	ST4.03ch01_1916731	1	2	2	2	3	1	1	1	3	2	3	3	2	3	4	2	1	3	1	3	3	2	3	3	1	3	4	3	4	1	1	3	2	1	2	3	2	0	2	2	2	4	4	3	2	1
chr01_2004600	chr01	2004600	ST4.03ch01_1927569	4	4	4	4	4	4	4	4	4	4	4	4	4	3	4	4	4	4	3	4	4	4	3	4	4	4	4	4	4	4	4	4	4	4	3	3	4	4	4	4	4	4	4	4	4	4
chr01_2004903	chr01	2004903	ST4.03ch01_1927872	4	4	2	4	4	4	3	3	4	3	2	3	3	3	3	4	3	2	3	2	4	4	3	3	4	3	2	4	4	3	2	3	4	4	3	3	4	4	2	3	3	3	0	3	3	4
chr01_2083910	chr01	2083910	ST4.03ch01_2008412	4	3	4	2	4	4	4	4	4	4	3	4	3	4	4	3	4	4	4	4	3	2	4	4	4	3	4	4	4	4	4	4	3	2	4	4	4	4	4	4	3	4	4	4	4	4
chr01_2125573	chr01	2125573	candidate_SNP:2125572-2125573	4	4	4	4	4	4	4	4	4	4	4	4	4	4	4	4	4	4	4	4	4	4	4	4	4	4	4	4	4	4	4	4	4	4	3	4	4	4	4	4	4	4	4	4	4	4
chr01_2142641	chr01	2142641	solcap_snp_c2_6713	4	4	3	4	4	3	3	3	4	3	3	3	3	3	3	4	3	3	3	3	4	4	2	3	4	3	2	3	4	3	3	3	4	4	3	3	4	4	3	3	3	2	0	3	3	4
chr01_2152954	chr01	2152954	ST4.03ch01_2078884	3	3	4	4	4	3	4	4	4	3	3	2	3	3	0	4	4	3	1	3	4	3	1	3	3	3	0	4	1	3	4	4	4	4	2	4	3	4	2	3	4	0	0	3	3	2
chr01_2153560	chr01	2153560	candidate_SNP:2153559-2153560	4	3	4	4	4	4	4	4	4	4	4	3	4	4	4	4	4	4	3	4	4	4	3	4	3	4	4	4	4	4	4	4	4	4	3	4	4	4	3	3	4	4	4	4	4	3
chr01_2159181	chr01	2159181	candidate_SNP:2159180-2159181	4	4	4	4	4	4	4	4	4	4	4	4	4	4	4	4	4	4	4	4	4	4	4	4	4	4	4	4	4	4	4	4	4	4	4	4	4	4	4	4	4	4	4	4	4	4
chr01_2160795	chr01	2160795	candidate_SNP:2160794-2160795	4	3	4	3	1	4	4	4	3	3	4	2	2	3	4	3	4	3	2	2	3	3	3	2	3	3	4	2	2	4	4	2	4	3	2	3	4	4	3	3	3	4	4	4	3	3
chr01_2163659	chr01	2163659	ST4.03ch01_2090684	4	4	4	4	4	4	4	4	4	4	4	3	4	4	4	4	4	4	4	4	4	4	3	4	4	4	4	4	4	4	4	4	4	4	4	4	4	4	4	4	4	4	4	4	4	4
chr01_2195994	chr01	2195994	candidate_SNP:2195993-2195994	4	4	4	4	4	4	4	4	4	4	4	4	4	4	4	4	4	4	3	4	4	4	4	4	4	4	4	4	4	3	4	4	4	4	4	4	4	4	2	4	4	4	4	4	4	4
chr01_2223999	chr01	2223999	candidate_SNP:2223998-2223999	4	3	3	4	4	3	3	3	4	3	3	3	3	3	3	4	3	3	3	3	4	3	3	3	3	3	3	3	3	4	4	3	3	4	3	3	3	4	3	3	3	3	3	3	3	3
chr01_2487224	chr01	2487224	ST4.03ch01_2453458	4	3	4	3	0	3	4	2	2	2	3	2	2	2	3	3	4	3	2	4	2	3	1	2	2	2	2	2	1	3	3	2	2	3	2	2	4	3	1	3	2	3	4	3	3	3
chr01_2495981	chr01	2495981	ST4.03ch01_2462215	0	1	0	2	0	0	0	0	0	0	1	0	0	0	0	2	0	0	0	0	1	0	0	0	0	0	0	0	0	0	0	0	1	1	0	0	0	0	0	0	1	0	0	0	0	0
chr01_2497119	chr01	2497119	ST4.03ch01_2463353	4	2	2	4	4	3	2	3	2	3	2	2	3	3	3	4	3	2	1	2	2	3	3	2	3	2	0	3	3	4	4	2	3	4	0	2	3	4	2	2	3	2	0	3	3	3
chr01_2530170	chr01	2530170	solcap_snp_c2_21078	0	2	1	2	0	1	0	1	0	1	1	1	0	0	0	2	0	0	2	0	1	1	1	1	1	0	2	0	1	0	0	1	2	2	1	2	0	1	3	0	1	0	0	1	1	1
chr01_2536793	chr01	2536793	candidate_SNP:2536792-2536793	4	4	3	4	4	4	4	4	3	4	4	4	4	4	4	4	4	4	3	4	4	2	4	4	4	4	3	4	3	4	4	4	4	4	3	2	2	4	3	3	4	4	4	4	4	4
chr01_2537345	chr01	2537345	PotVar0044815	3	2	1	3	0	1	2	1	2	1	1	0	0	1	0	3	2	1	1	2	2	1	1	1	2	1	0	2	0	2	1	1	2	3	1	1	2	3	0	0	2	0	0	0	2	1
chr01_2537726	chr01	2537726	PotVar0044829	4	3	4	4	4	4	4	4	4	4	4	3	4	4	4	4	4	4	2	4	4	4	4	3	3	4	2	4	3	4	4	4	3	4	3	2	4	4	3	2	4	4	4	4	4	3
chr01_2577573	chr01	2577573	candidate_SNP:2577572-2577573	4	4	3	4	4	3	4	3	4	3	2	3	4	4	4	4	4	4	4	3	4	4	3	4	4	3	3	3	4	4	4	3	4	4	3	4	4	4	4	3	3	3	1	4	3	4
chr01_2584832	chr01	2584832	ST4.03ch01_2556267	3	4	4	4	4	4	4	3	3	4	3	3	3	4	3	4	4	4	4	3	1	4	3	4	3	4	3	4	4	3	3	4	4	4	3	4	3	4	4	2	4	3	1	3	4	3
chr01_2586304	chr01	2586304	ST4.03ch01_2557739	4	4	4	4	4	3	4	3	4	3	3	3	4	4	4	4	4	4	4	3	4	4	3	4	4	4	3	3	4	4	4	3	4	4	3	4	4	4	4	3	3	3	1	4	3	4
chr01_2607128	chr01	2607128	candidate_SNP:2607127-2607128	3	4	4	4	4	4	4	4	3	4	4	4	4	3	4	4	4	4	4	4	3	4	4	4	3	4	4	4	4	3	3	4	4	4	3	4	4	4	4	4	4	3	4	3	4	3
chr01_2617236	chr01	2617236	solcap_snp_c2_21098	3	2	4	3	2	2	2	2	2	1	4	1	2	2	3	3	1	3	1	3	2	2	2	2	2	3	3	3	2	2	2	2	1	3	3	2	2	2	1	1	3	3	4	3	2	2
chr01_2619991	chr01	2619991	candidate_SNP:2619990-2619991	4	4	1	4	4	4	4	4	4	4	4	4	4	4	4	4	4	4	4	4	4	4	4	4	4	4	4	4	4	3	3	4	4	4	3	4	4	4	4	4	4	4	4	3	3	4
chr01_2644394	chr01	2644394	solcap_snp_c2_21109	2	2	2	1	1	2	2	2	1	2	1	2	1	1	0	1	3	1	2	2	0	2	2	2	2	1	2	2	2	2	1	1	2	1	1	2	1	3	3	3	1	0	0	1	2	2
chr01_2690797	chr01	2690797	solcap_snp_c2_21122	3	3	3	2	0	2	3	3	3	3	3	1	2	3	3	3	2	3	2	3	3	1	2	1	1	3	3	1	0	3	3	2	1	3	2	1	4	1	1	1	3	3	4	3	2	0
chr01_2701581	chr01	2701581	candidate_SNP:2701580-2701581	4	4	4	4	4	4	4	4	4	4	4	4	4	3	4	4	4	3	4	2	4	4	4	4	4	4	4	4	4	4	4	4	4	4	4	4	2	4	3	4	4	4	4	4	4	4
chr01_2703864	chr01	2703864	candidate_SNP:2703863-2703864	3	4	3	4	4	3	4	3	3	3	3	3	3	2	3	4	4	3	4	2	2	3	3	4	3	4	2	3	4	3	3	3	4	3	2	4	2	4	3	3	3	3	1	3	3	3
chr01_2710391	chr01	2710391	candidate_SNP:2710390-2710391	4	3	3	2	4	2	2	4	3	4	4	4	4	4	4	0	4	4	4	4	3	4	4	3	4	4	4	4	0	4	4	4	2	2	4	3	4	1	4	4	3	4	3	4	3	3
chr01_2715199	chr01	2715199	candidate_SNP:2715198-2715199	3	4	4	4	4	4	4	4	4	4	4	4	3	3	3	4	4	4	4	4	4	3	4	4	3	4	3	4	4	3	3	4	4	4	4	4	3	4	4	4	4	3	4	3	4	3
chr01_2749596	chr01	2749596	candidate_SNP:2749595-2749596	3	3	3	3	2	4	4	4	2	2	3	2	2	3	1	3	3	3	4	4	3	2	2	2	2	2	3	2	2	3	3	2	3	4	4	3	3	4	3	3	2	2	3	2	3	3
chr01_2783995	chr01	2783995	candidate_SNP:2783994-2783995	4	4	4	3	3	4	4	4	3	4	4	4	4	4	4	3	4	3	4	4	4	4	4	2	4	3	4	3	1	4	4	4	4	4	4	3	4	4	4	4	3	4	4	4	4	4
chr01_2793314	chr01	2793314	ST4.03ch01_2772280	4	3	3	4	4	3	4	3	3	3	3	3	4	4	3	4	4	3	4	4	3	4	3	4	4	2	2	3	4	4	4	3	4	3	2	4	4	4	4	3	3	3	1	2	3	4
chr01_2799992	chr01	2799992	candidate_SNP:2799991-2799992	4	4	4	4	4	4	4	4	4	4	4	4	4	4	4	4	4	4	4	4	4	4	4	4	4	4	4	4	4	4	4	4	4	4	4	4	4	4	4	4	4	4	4	4	4	4
chr01_2823711	chr01	2823711	solcap_snp_c2_21174	3	4	1	3	4	3	3	2	4	3	3	3	1	3	2	2	4	2	2	2	0	3	3	4	3	2	2	1	4	3	4	2	4	1	4	4	3	4	4	3	2	3	1	1	3	2
chr01_2825566	chr01	2825566	candidate_SNP:2825565-2825566	2	4	4	2	4	3	3	4	3	3	4	4	4	3	4	1	2	3	3	3	4	4	4	3	4	3	4	4	4	4	2	4	4	3	4	3	3	2	4	4	3	4	4	4	4	4
chr01_2826395	chr01	2826395	candidate_SNP:2826394-2826395	3	3	1	2	4	2	3	3	3	3	3	4	3	2	3	2	4	2	1	2	2	4	3	4	3	2	3	3	4	3	4	3	4	4	2	4	4	4	4	2	3	3	0	1	4	3
chr01_2827522	chr01	2827522	solcap_snp_c2_21176	4	4	4	4	3	4	4	4	3	2	4	3	3	3	2	4	4	4	4	4	2	3	3	4	4	4	4	3	4	4	4	2	4	4	4	4	4	4	3	4	4	2	4	3	4	4
chr01_2829162	chr01	2829162	solcap_snp_c2_21178	4	2	4	1	0	3	4	3	2	2	3	2	2	3	3	2	2	3	2	4	2	2	2	1	3	3	2	2	0	3	3	2	0	2	3	1	4	3	1	2	2	2	4	3	3	2
chr01_2837586	chr01	2837586	candidate_SNP:2837585-2837586	4	4	4	4	4	4	4	4	4	4	4	4	4	4	4	4	4	4	4	4	4	4	4	4	4	4	4	4	4	4	4	4	4	4	4	4	3	4	4	4	4	4	3	4	4	4
chr01_2868145	chr01	2868145	PotVar0044963	2	3	2	2	4	2	3	2	2	2	3	3	3	3	3	2	2	2	2	2	3	4	3	3	3	2	3	3	4	3	3	3	4	1	3	3	2	3	3	3	2	3	1	2	2	4
chr01_2879038	chr01	2879038	solcap_snp_c2_21216	4	3	1	3	4	3	3	3	4	3	2	3	3	3	4	3	4	3	3	2	2	4	3	4	4	3	3	3	4	4	4	3	4	2	3	4	4	4	3	3	2	4	2	3	2	4
chr01_2934649	chr01	2934649	candidate_SNP:2934648-2934649	4	4	3	4	4	4	4	4	3	4	4	4	4	4	4	4	4	4	4	4	4	4	4	4	4	4	4	4	4	4	4	4	4	4	3	4	4	4	4	4	4	4	4	4	4	4
chr01_2961802	chr01	2961802	ST4.03ch01_2951351	3	3	1	3	4	3	3	3	2	3	2	3	2	2	2	3	4	2	3	2	2	3	3	4	3	2	2	3	4	3	3	3	4	2	2	4	3	4	3	3	2	3	1	2	2	3
chr01_2966057	chr01	2966057	solcap_snp_c2_21234	0	0	0	0	0	0	0	0	0	0	0	0	0	0	0	0	0	0	0	0	1	0	1	0	0	0	0	0	0	0	0	0	0	0	0	0	0	0	0	0	0	0	0	0	0	0
chr01_2967161	chr01	2967161	solcap_snp_c1_6704	2	3	2	3	4	3	3	3	3	3	2	3	2	2	2	3	4	2	3	2	2	3	2	4	3	2	2	3	4	3	2	3	4	2	2	4	2	4	3	3	2	3	0	3	3	3
chr01_2968173	chr01	2968173	solcap_snp_c2_21236	2	2	0	3	4	3	3	3	2	2	4	4	3	3	3	3	1	1	3	2	3	4	4	4	4	1	3	3	4	3	4	2	4	2	3	4	2	3	4	3	1	4	0	3	3	4
chr01_3063018	chr01	3063018	ST4.03ch01_3062213	4	4	4	4	3	3	3	3	4	3	4	4	4	4	4	4	2	4	4	3	4	3	4	4	3	4	4	4	4	4	4	3	4	4	4	4	4	2	3	4	4	4	3	4	4	4
chr01_3063998	chr01	3063998	candidate_SNP:3063997-3063998	4	4	3	4	2	4	3	4	3	3	4	3	3	3	2	4	4	4	4	4	3	3	3	4	4	4	4	3	4	4	4	2	4	4	4	4	3	4	3	4	4	2	4	2	2	4
chr01_3071194	chr01	3071194	candidate_SNP:3071193-3071194	0	1	0	0	0	0	0	0	0	0	0	0	0	0	0	0	0	0	0	0	0	0	1	0	0	0	0	0	0	0	0	0	0	0	0	0	0	0	0	0	0	0	0	0	0	0
chr01_3072782	chr01	3072782	candidate_SNP:3072781-3072782	4	4	3	4	4	4	4	4	4	4	4	4	4	4	4	4	4	4	4	4	4	4	4	4	4	4	3	4	4	4	4	4	4	4	4	4	4	4	4	4	4	4	4	3	3	4
chr01_3087983	chr01	3087983	candidate_SNP:3087982-3087983	4	4	4	4	4	4	4	4	3	4	4	4	4	4	2	4	4	3	4	4	4	4	4	4	4	3	4	4	4	4	4	4	4	4	3	4	4	4	4	4	4	3	3	3	4	4
chr01_3107146	chr01	3107146	candidate_SNP:3107145-3107146	4	4	2	4	4	4	4	4	4	4	4	4	3	3	4	3	4	3	3	3	3	4	4	4	4	4	4	4	4	4	4	4	4	3	4	4	4	4	3	4	3	4	4	4	4	4
chr01_3123840	chr01	3123840	solcap_snp_c2_21262	3	2	3	4	4	3	4	2	2	3	4	2	3	3	3	4	4	3	2	4	2	1	2	3	3	2	0	2	1	3	3	2	2	3	1	3	3	4	3	1	3	2	2	2	4	1
chr01_3125582	chr01	3125582	ST4.03ch01_3124608	2	3	3	3	4	3	2	3	3	3	4	4	3	3	4	3	2	3	3	3	3	4	3	3	3	3	4	4	4	2	2	4	3	3	4	3	3	3	4	3	3	4	4	4	4	4
chr01_3214907	chr01	3214907	solcap_snp_c1_6707	4	3	3	4	4	3	4	3	4	3	3	3	4	4	4	4	3	4	4	4	4	4	3	4	4	3	2	2	4	4	4	3	4	3	3	4	4	4	4	3	3	4	2	4	3	4
chr01_3217590	chr01	3217590	candidate_SNP:3217589-3217590	2	1	2	2	2	2	2	2	3	3	0	1	2	2	2	2	2	2	1	1	2	2	3	3	1	2	0	2	3	3	3	1	2	1	1	3	1	1	2	2	2	2	0	2	2	0
chr01_3297505	chr01	3297505	ST4.03ch01_3295032	0	2	3	1	0	1	1	0	1	1	3	2	1	0	1	2	1	1	2	1	3	2	3	1	0	1	3	0	1	0	0	0	2	2	3	1	0	0	3	3	1	0	2	1	1	1
chr01_3297525	chr01	3297525	ST4.03ch01_3295052	4	2	4	4	4	3	4	4	3	3	4	3	4	4	4	4	3	4	4	4	3	4	3	4	4	3	3	4	4	4	4	4	4	4	3	4	4	4	4	4	3	4	3	4	4	4
chr01_3297610	chr01	3297610	ST4.03ch01_3295137	0	4	3	2	4	2	1	2	2	3	3	4	3	3	3	3	2	3	3	1	4	3	4	4	0	3	4	4	4	2	2	4	4	2	3	3	2	1	4	4	3	3	4	3	3	1
chr01_3298654	chr01	3298654	solcap_snp_c1_6123	3	3	3	2	2	3	2	2	3	2	1	3	2	2	2	3	2	2	1	2	3	1	4	3	2	2	0	4	2	2	1	2	0	3	3	4	2	3	1	0	3	2	2	2	4	1
chr01_3299991	chr01	3299991	candidate_SNP:3299990-3299991	4	4	4	4	4	4	4	4	3	4	4	4	4	4	4	4	4	4	4	4	4	4	4	4	4	4	4	4	4	4	4	4	4	4	3	4	4	4	4	4	4	4	4	4	4	4
chr01_3317977	chr01	3317977	solcap_snp_c2_19415	2	3	4	3	2	3	3	3	4	3	3	4	2	3	3	3	3	4	4	4	4	2	4	4	3	4	4	4	4	1	1	3	2	4	4	4	2	3	3	3	4	3	4	4	4	3
chr01_3318427	chr01	3318427	candidate_SNP:3318426-3318427	4	3	3	4	4	3	4	2	2	3	3	3	4	3	4	4	3	4	4	4	3	4	3	4	4	3	2	4	4	3	4	3	4	1	2	4	4	4	4	2	2	4	3	3	3	4
chr01_3411952	chr01	3411952	solcap_snp_c1_6122	4	2	3	3	4	2	3	3	3	3	1	2	3	3	3	3	3	1	1	2	2	3	3	2	3	2	1	4	3	4	4	3	1	2	1	3	3	4	2	2	2	2	1	3	2	2
chr01_3412447	chr01	3412447	candidate_SNP:3412446-3412447	4	3	2	3	4	3	3	3	3	3	1	2	3	3	3	3	3	2	1	2	2	3	3	3	3	2	1	4	3	4	4	3	2	2	2	3	3	4	2	1	2	3	1	3	3	1
chr01_3430349	chr01	3430349	candidate_SNP:3430348-3430349	1	1	1	1	1	1	1	1	0	0	1	0	0	0	1	1	1	0	0	0	1	1	2	0	0	0	0	0	0	1	0	1	2	0	0	0	1	1	1	1	0	0	0	1	1	0
chr01_3453579	chr01	3453579	candidate_SNP:3453578-3453579	4	4	4	4	4	4	4	4	4	4	4	4	4	4	4	4	4	4	4	4	4	4	4	4	4	4	4	4	4	4	4	4	4	4	4	4	4	4	4	4	4	4	4	4	4	4
chr01_3475197	chr01	3475197	candidate_SNP:3475196-3475197	4	4	4	4	4	3	3	3	4	4	4	4	4	4	3	4	4	4	4	2	4	4	4	4	3	4	4	3	4	4	4	3	4	3	4	4	3	2	4	4	4	4	4	3	2	2
chr01_3533220	chr01	3533220	solcap_snp_c2_19396	1	2	1	2	3	3	3	3	2	2	1	1	2	2	0	3	3	2	1	2	3	1	2	3	2	3	1	4	3	1	1	2	1	2	2	3	2	4	0	0	2	1	1	0	2	1
chr01_3552097	chr01	3552097	ST4.03ch01_3567385	4	4	4	4	3	3	4	3	2	3	4	4	4	4	NA	4	3	4	4	4	4	4	4	4	4	4	4	4	4	4	4	4	4	4	4	4	3	3	4	4	4	4	4	4	4	4
chr01_3586395	chr01	3586395	candidate_SNP:3586394-3586395	3	4	4	4	3	3	4	3	4	3	4	4	4	4	4	4	2	4	4	4	4	3	4	4	4	4	4	4	4	3	3	4	4	4	4	4	4	3	3	3	4	4	4	4	4	4
chr01_3600000	chr01	3600000	candidate_SNP:3599999-3600000	4	4	4	4	4	4	4	4	4	4	4	4	4	4	4	4	4	4	4	4	4	4	4	4	4	4	4	4	4	4	4	4	4	4	4	4	4	4	4	4	4	4	4	4	4	4
chr01_3651900	chr01	3651900	candidate_SNP:3651899-3651900	3	4	4	3	1	3	1	3	4	2	4	4	4	4	4	2	2	4	4	2	4	3	4	1	1	3	4	2	0	2	1	2	3	2	4	1	3	1	0	0	3	4	4	4	2	0
chr01_3661599	chr01	3661599	candidate_SNP:3661598-3661599	1	2	2	1	0	2	1	2	1	1	2	1	3	2	1	2	1	3	1	1	2	0	3	0	0	1	1	2	0	1	1	0	1	1	3	1	2	1	0	0	1	1	1	1	3	0
chr01_3678399	chr01	3678399	candidate_SNP:3678398-3678399	4	4	4	4	4	4	4	4	3	4	4	4	4	4	4	4	4	4	4	4	4	4	4	4	4	4	4	4	4	4	4	4	4	4	3	4	4	4	4	4	4	4	4	4	4	4
chr01_3679982	chr01	3679982	candidate_SNP:3679981-3679982	3	4	4	3	3	3	3	3	4	3	4	4	2	4	4	3	3	4	4	3	2	0	4	3	3	3	4	3	0	3	4	3	3	3	1	3	3	2	1	1	3	4	4	4	3	0
chr01_3697600	chr01	3697600	candidate_SNP:3697599-3697600	4	4	4	4	4	4	4	4	3	4	4	4	4	4	4	4	4	4	4	4	4	4	4	4	4	4	4	4	4	4	4	4	4	4	3	4	4	4	4	4	4	4	4	4	4	4
chr01_3709565	chr01	3709565	candidate_SNP:3709564-3709565	4	4	4	4	3	3	4	3	4	3	4	4	4	4	4	4	3	4	4	4	4	4	4	4	4	4	4	4	4	3	3	4	4	4	4	4	4	3	4	4	4	4	4	4	4	4
chr01_3730701	chr01	3730701	solcap_snp_c2_19358	2	3	2	2	4	4	3	4	2	3	1	2	3	2	1	2	3	2	1	1	3	2	2	3	3	3	1	4	2	2	2	2	2	2	2	3	3	4	1	0	2	1	1	1	2	1
chr01_3744040	chr01	3744040	solcap_snp_c2_19353	2	3	1	2	3	3	1	3	1	3	1	1	2	2	1	2	3	2	1	2	3	0	2	1	2	2	2	2	0	1	1	2	1	2	2	1	1	2	0	0	1	1	1	1	2	0
chr01_3747946	chr01	3747946	candidate_SNP:3747945-3747946	3	2	2	3	4	4	3	4	2	3	1	1	3	2	2	3	3	2	1	2	3	1	2	3	3	3	1	4	3	3	3	3	2	2	2	3	2	4	1	1	2	2	1	2	2	1
chr01_3789573	chr01	3789573	candidate_SNP:3789572-3789573	4	3	4	4	3	4	4	4	4	3	4	3	4	3	4	4	4	4	4	4	4	4	4	4	4	4	4	4	4	4	4	3	4	4	4	4	4	4	4	4	4	4	4	4	4	4
chr01_3799956	chr01	3799956	solcap_snp_c2_19325	4	4	4	4	4	4	4	4	3	4	4	4	4	4	4	4	4	4	4	4	4	4	4	4	4	4	4	4	4	4	4	4	4	4	3	4	3	4	4	4	4	4	4	4	4	4
chr01_3800705	chr01	3800705	candidate_SNP:3800704-3800705	2	2	1	2	2	2	2	3	1	1	0	2	1	1	0	1	3	2	1	1	3	0	2	1	2	3	1	2	0	2	1	2	1	1	2	1	2	4	0	0	1	1	1	0	1	1
chr01_3817651	chr01	3817651	ST4.03ch01_3836375	3	3	2	3	3	3	3	3	1	2	1	2	3	2	2	3	2	2	1	2	3	2	2	3	3	3	1	3	3	2	2	3	2	2	2	3	2	3	1	1	2	2	1	2	3	1
chr01_3832330	chr01	3832330	solcap_snp_c2_19302	2	4	1	4	4	4	3	4	3	3	3	2	2	1	3	4	3	4	1	4	4	2	1	3	3	4	1	3	3	3	3	3	2	3	3	3	3	4	1	1	3	2	2	3	3	0
chr01_3836789	chr01	3836789	candidate_SNP:3836788-3836789	3	2	2	3	2	2	2	2	0	1	1	2	2	2	2	3	2	1	1	1	3	3	1	2	2	3	1	2	4	2	2	2	1	2	3	4	2	1	1	1	2	2	1	2	2	0
chr01_3837566	chr01	3837566	candidate_SNP:3837565-3837566	3	4	3	4	3	3	2	2	2	3	3	2	3	2	2	4	2	4	2	4	4	3	3	3	2	4	2	3	3	4	2	3	4	4	2	3	2	3	2	2	3	2	2	3	2	2
chr01_3888419	chr01	3888419	solcap_snp_c2_19268	2	2	1	2	1	1	1	1	1	1	1	1	1	1	0	1	2	2	1	1	1	0	2	1	1	1	0	2	0	1	2	1	1	1	1	1	1	1	0	0	1	1	1	0	1	0
chr01_3900504	chr01	3900504	solcap_snp_c2_19261	1	2	1	2	2	1	2	2	2	1	1	1	1	1	0	2	2	2	1	1	2	0	2	1	1	2	0	2	0	1	1	1	1	1	1	1	1	1	0	0	1	1	1	0	2	0
chr01_3919709	chr01	3919709	solcap_snp_c2_19252	0	0	0	0	0	0	0	0	0	0	0	0	0	0	0	0	0	0	0	0	0	0	0	0	0	0	0	0	0	0	0	0	0	0	0	0	0	0	0	0	0	0	0	0	0	0
chr01_3924797	chr01	3924797	candidate_SNP:3924796-3924797	2	1	2	1	0	2	2	2	1	1	0	0	3	1	1	1	2	1	1	1	1	0	0	2	3	2	0	0	0	2	2	0	0	1	1	2	1	2	0	0	1	0	1	1	0	0
chr01_3926671	chr01	3926671	solcap_snp_c2_19251	3	2	3	3	2	4	3	4	4	3	3	1	3	3	3	2	4	3	4	4	2	2	2	2	4	3	3	2	1	3	3	2	1	4	4	2	3	4	3	2	3	3	4	4	2	4
chr01_3932007	chr01	3932007	PotVar0045145	3	1	4	2	1	4	3	4	4	3	1	2	3	3	3	1	4	1	4	2	2	2	4	2	4	2	3	2	1	3	3	2	2	3	4	2	3	4	3	3	2	2	3	3	3	4
chr01_3935999	chr01	3935999	PotVar0045260	3	4	2	4	4	4	2	4	3	3	3	2	3	2	3	4	3	4	1	3	4	2	2	3	3	4	1	3	3	3	3	3	2	2	3	3	3	4	1	1	3	3	2	3	3	1
chr01_3959847	chr01	3959847	candidate_SNP:3959846-3959847	0	0	1	0	0	0	1	0	0	0	0	0	0	0	1	0	0	0	0	0	1	0	1	0	0	0	0	0	0	0	0	0	0	0	0	0	1	0	0	0	0	0	0	1	1	0
chr01_4007948	chr01	4007948	candidate_SNP:4007947-4007948	4	2	3	2	4	4	4	4	2	3	1	3	4	4	3	3	3	2	4	2	3	4	3	4	4	2	3	4	4	4	4	3	4	1	3	4	4	4	4	3	2	2	3	3	3	4
chr01_4012293	chr01	4012293	PotVar0045401	3	4	3	4	4	4	2	4	2	4	4	3	3	2	3	4	4	4	1	3	4	2	3	3	3	4	2	3	3	3	3	4	2	4	3	3	3	4	1	2	4	3	3	3	4	1
chr01_4013228	chr01	4013228	PotVar0045428	1	1	3	1	1	1	2	2	3	2	3	1	2	3	3	2	3	2	2	3	2	2	4	2	1	1	3	1	1	1	1	1	2	3	2	1	2	1	3	3	2	2	2	3	2	3
chr01_4013853	chr01	4013853	PotVar0045459	4	3	4	3	4	4	4	4	4	4	2	4	4	4	3	3	4	2	4	2	3	4	4	4	4	3	4	4	4	4	4	4	4	3	4	4	4	4	4	4	3	3	3	3	4	4
chr01_4013949	chr01	4013949	PotVar0045460	0	0	1	0	1	1	0	1	0	1	0	0	0	0	1	0	1	0	0	0	1	0	2	0	0	0	0	0	0	0	0	0	0	0	0	0	0	1	0	0	0	0	0	1	1	0
chr01_4014415	chr01	4014415	PotVar0045502	4	3	2	3	4	4	4	4	3	4	2	3	4	4	3	3	2	1	4	0	3	4	4	4	4	3	2	4	4	4	3	3	4	2	3	4	2	4	4	1	2	0	3	2	4	4
chr01_4020170	chr01	4020170	PotVar0045660	2	2	2	2	2	2	2	2	2	2	2	2	2	2	2	2	2	2	2	2	2	2	2	2	2	2	2	2	2	2	2	2	2	2	2	2	2	2	2	2	2	2	2	2	2	2
chr01_4020317	chr01	4020317	PotVar0045662	4	4	3	4	4	4	4	4	4	3	3	3	4	4	4	4	3	4	4	4	4	4	3	4	4	4	4	4	4	4	4	3	4	3	4	4	4	4	4	3	3	4	3	4	3	4
chr01_4030399	chr01	4030399	solcap_snp_c1_6118	2	3	3	3	3	1	3	1	3	2	4	4	2	3	3	3	1	3	3	3	3	4	4	3	2	2	4	4	4	2	2	4	4	3	2	3	3	3	4	4	3	3	3	3	4	4
chr01_4042400	chr01	4042400	candidate_SNP:4042399-4042400	3	3	4	4	3	3	4	3	4	2	4	3	4	3	4	4	3	4	4	4	4	3	4	4	3	4	1	3	4	3	3	2	3	4	4	4	4	2	3	3	4	4	4	4	4	2
chr01_4054753	chr01	4054753	ST4.03ch01_4079540	2	2	2	1	2	2	1	2	1	1	0	1	2	2	2	1	1	1	1	1	1	3	0	1	2	2	1	0	0	2	2	2	3	1	2	1	2	2	2	1	1	1	1	2	1	0
chr01_4428770	chr01	4428770	candidate_SNP:4428769-4428770	4	3	4	3	1	4	4	4	4	2	4	3	4	3	3	4	3	4	4	4	3	4	4	4	4	4	3	4	4	3	3	2	4	4	4	4	4	4	4	4	3	4	3	4	3	4
chr01_4535197	chr01	4535197	candidate_SNP:4535196-4535197	1	3	2	3	2	2	2	1	2	2	4	2	1	0	2	3	1	3	0	2	3	2	1	2	3	2	1	3	3	1	1	3	2	3	2	2	2	2	2	2	3	2	2	3	4	2
chr01_4592988	chr01	4592988	solcap_snp_c2_51811	3	3	2	3	3	2	3	2	4	3	4	4	3	3	4	2	1	3	1	3	3	4	4	3	4	1	4	4	4	3	3	4	4	3	4	3	4	3	4	4	3	4	4	4	4	4
chr01_4593103	chr01	4593103	solcap_snp_c2_51810	3	3	3	2	2	3	3	2	4	4	2	3	3	3	4	3	2	2	3	3	3	4	4	4	4	2	4	2	4	3	3	3	3	3	3	3	4	3	4	4	3	3	4	4	2	4
chr01_4593244	chr01	4593244	solcap_snp_c2_51808	3	3	2	3	4	4	2	4	2	3	2	2	3	2	3	3	3	3	1	2	3	2	2	3	3	3	2	3	3	3	3	3	2	2	2	3	2	4	2	2	2	3	2	2	3	2
chr01_4593283	chr01	4593283	solcap_snp_c2_51807	4	4	3	4	4	4	4	4	4	3	2	3	4	4	4	4	3	4	4	4	4	4	3	4	4	4	3	4	4	4	4	3	4	3	4	4	4	4	4	3	3	4	3	4	3	4
chr01_4596586	chr01	4596586	solcap_snp_c2_51806	3	3	2	3	4	4	2	4	1	2	1	2	3	2	3	3	3	2	1	1	3	2	2	3	3	3	2	3	3	3	3	3	2	1	2	3	2	4	1	1	2	3	2	2	3	1
chr01_4616913	chr01	4616913	candidate_SNP:4616912-4616913	4	3	4	4	3	4	4	4	4	3	4	3	4	3	3	4	4	4	4	4	4	4	4	4	4	4	3	4	4	3	3	3	4	4	4	4	4	4	4	4	4	3	3	4	4	4
chr01_4631969	chr01	4631969	candidate_SNP:4631968-4631969	3	4	4	4	4	4	4	4	4	4	4	4	4	4	4	4	4	4	4	4	4	3	4	4	4	4	4	4	4	3	3	4	2	4	4	4	4	4	2	3	4	4	4	4	4	4
chr01_4643672	chr01	4643672	solcap_snp_c2_51791	3	4	3	4	4	4	2	4	2	4	4	3	3	2	3	4	4	4	1	3	4	2	3	3	3	4	2	3	3	3	3	4	2	4	3	3	3	4	1	2	4	3	3	3	4	1
chr01_4721756	chr01	4721756	candidate_SNP:4721755-4721756	4	4	2	4	4	4	3	4	3	4	4	3	3	3	3	4	4	4	2	3	4	3	4	3	2	4	3	4	3	3	3	4	2	4	3	3	3	4	2	3	4	3	2	3	4	3
chr01_4787996	chr01	4787996	candidate_SNP:4787995-4787996	4	4	4	3	4	4	3	4	3	4	3	4	4	4	4	4	4	3	4	3	3	4	4	3	4	4	4	4	4	4	4	4	4	3	3	3	3	4	4	4	3	4	4	3	4	4
chr01_4825469	chr01	4825469	candidate_SNP:4825468-4825469	4	4	2	4	4	4	4	4	4	3	2	1	4	4	4	4	3	4	4	4	4	4	2	4	4	4	0	4	4	4	4	2	3	1	4	4	4	4	NA	0	2	4	1	4	2	NA
chr01_4910396	chr01	4910396	candidate_SNP:4910395-4910396	4	3	4	3	4	4	4	4	4	4	3	4	4	4	4	3	4	3	4	3	3	4	4	4	4	3	4	4	4	4	4	4	4	3	4	4	4	4	4	4	3	4	4	3	4	4
chr01_4915170	chr01	4915170	candidate_SNP:4915169-4915170	3	3	3	3	4	2	3	3	4	4	4	4	2	3	3	3	3	3	2	3	3	4	3	3	4	3	4	4	4	2	1	3	4	3	3	3	3	3	NA	4	3	4	4	4	4	4
chr01_4996079	chr01	4996079	solcap_snp_c2_49936	4	3	3	1	2	2	4	3	2	3	2	3	2	4	2	2	4	3	4	4	1	2	4	1	2	3	4	2	1	4	4	3	3	4	3	2	4	2	4	4	3	2	3	2	1	4
chr01_4996082	chr01	4996082	solcap_snp_c2_49935	4	4	4	4	4	4	4	4	4	4	4	4	4	4	4	4	4	4	4	4	4	4	4	4	4	4	4	4	4	4	4	4	4	4	3	4	4	4	4	4	4	4	4	4	4	4
chr01_5000776	chr01	5000776	candidate_SNP:5000775-5000776	2	3	3	3	4	3	4	3	4	4	4	4	3	3	4	3	3	3	3	3	3	4	2	3	4	3	4	4	4	3	3	4	4	3	4	3	3	3	4	4	3	4	4	4	4	4
chr01_5017571	chr01	5017571	candidate_SNP:5017570-5017571	4	4	4	4	4	3	2	3	4	4	4	4	4	4	4	4	4	4	4	4	4	4	4	4	4	4	4	4	4	4	4	4	4	4	4	4	2	3	4	4	4	4	4	4	3	4
chr01_5037549	chr01	5037549	candidate_SNP:5037548-5037549	2	4	2	4	4	4	3	4	1	4	3	4	2	4	4	3	2	1	0	NA	3	4	1	2	4	4	4	4	4	4	2	4	4	0	4	3	3	4	4	3	1	4	3	2	4	2
chr01_5038369	chr01	5038369	candidate_SNP:5038368-5038369	3	1	1	2	0	1	1	1	0	0	0	0	1	2	0	1	2	2	2	2	1	1	3	2	0	3	0	0	0	3	1	0	1	2	0	1	3	1	2	2	2	0	0	0	0	0
chr01_5081475	chr01	5081475	solcap_snp_c2_56594	4	3	4	4	2	3	4	3	4	2	4	3	4	3	3	4	3	4	4	4	4	4	4	4	4	4	3	3	4	3	3	2	4	4	4	4	4	3	4	4	4	3	3	4	4	3
chr01_5098397	chr01	5098397	candidate_SNP:5098396-5098397	3	2	2	3	1	2	1	2	1	1	1	1	2	2	2	4	2	3	1	2	3	2	2	3	2	3	0	2	3	2	3	2	2	3	1	2	3	1	1	1	2	2	2	3	2	1
chr01_5323711	chr01	5323711	solcap_snp_c2_58218	1	3	3	3	0	2	0	1	0	4	3	1	3	1	2	3	1	0	1	3	3	3	2	3	1	4	4	0	4	2	1	2	2	2	2	2	1	0	2	2	2	2	3	3	3	0
chr01_5654532	chr01	5654532	solcap_snp_c2_55012	3	2	1	1	1	2	0	2	1	1	0	1	2	2	1	1	0	1	1	1	1	1	2	1	2	2	0	0	1	3	3	0	1	1	1	2	1	0	1	2	1	2	2	1	0	0
chr01_5715948	chr01	5715948	candidate_SNP:5715947-5715948	4	4	3	4	4	4	4	4	4	4	4	4	4	4	3	4	4	4	4	4	4	4	4	4	4	4	4	4	4	4	4	4	4	4	4	4	4	4	4	4	4	4	4	3	3	4
chr01_5729084	chr01	5729084	solcap_snp_c2_48054	4	0	2	3	0	4	0	4	2	2	0	0	2	2	2	2	3	1	1	2	1	1	2	2	4	1	0	1	0	2	3	0	1	0	2	2	2	3	1	1	0	1	2	2	3	0
chr01_5729429	chr01	5729429	solcap_snp_c2_48051	4	4	3	4	4	4	4	4	4	3	3	3	4	4	4	4	4	4	4	4	4	4	3	4	4	4	3	4	4	4	4	3	4	2	3	4	4	4	4	4	3	4	3	4	3	4
chr01_5771982	chr01	5771982	candidate_SNP:5771981-5771982	3	2	2	1	1	3	2	3	1	2	1	2	2	3	2	1	0	1	3	2	1	2	2	1	4	2	3	0	1	3	2	1	3	1	3	1	2	2	3	4	1	2	2	2	2	2
chr01_5773579	chr01	5773579	candidate_SNP:5773578-5773579	4	3	4	3	1	3	4	3	4	2	4	3	3	4	4	2	3	3	4	4	3	3	4	2	4	3	4	2	1	4	4	2	3	4	4	2	4	3	4	4	3	3	4	4	3	3
chr01_5790231	chr01	5790231	solcap_snp_c1_14212	4	4	2	4	4	4	4	4	4	3	3	3	4	4	4	4	4	4	4	4	4	4	2	4	4	4	2	4	4	4	4	2	4	2	2	4	4	4	4	4	3	4	3	4	4	4
chr01_5791901	chr01	5791901	solcap_snp_c1_14210	4	4	4	4	4	3	3	3	3	4	4	4	3	4	3	4	4	4	4	4	4	4	3	4	4	4	2	4	4	4	4	4	3	4	4	3	4	4	2	3	4	4	3	3	4	2
chr01_5795190	chr01	5795190	candidate_SNP:5795189-5795190	4	4	4	3	3	4	4	4	4	4	4	3	4	4	4	3	4	3	4	4	3	4	4	4	4	4	4	2	4	4	4	3	3	4	4	4	4	4	4	4	4	3	4	4	3	4
chr01_6012003	chr01	6012003	solcap_snp_c2_56125	2	1	1	1	0	2	1	2	1	1	1	1	2	2	2	1	0	1	3	1	1	1	1	1	3	2	2	0	1	2	1	0	2	1	1	2	1	0	2	2	1	1	1	2	1	2
chr01_6027200	chr01	6027200	candidate_SNP:6027199-6027200	4	4	4	4	3	4	4	4	4	3	4	3	4	3	4	4	4	4	4	4	4	4	4	4	4	4	3	4	4	4	4	3	4	4	4	4	4	4	4	3	4	3	3	4	4	4
chr01_6037709	chr01	6037709	solcap_snp_c2_56114	4	3	3	4	3	2	4	2	3	1	2	3	4	4	4	4	3	4	4	4	4	4	3	4	4	4	3	1	NA	4	4	2	4	2	3	4	4	2	4	4	2	4	3	4	2	3
chr01_6058357	chr01	6058357	candidate_SNP:6058356-6058357	4	4	4	4	3	4	4	4	4	4	4	4	3	4	4	4	4	4	4	4	4	3	4	3	4	4	4	4	3	4	4	4	4	4	4	3	4	4	4	4	3	4	4	4	4	4
chr01_6061848	chr01	6061848	solcap_snp_c1_13279	4	4	4	4	3	4	2	4	3	4	4	4	3	4	4	4	3	4	4	4	4	3	4	3	4	4	4	4	2	4	4	4	4	4	3	3	2	4	4	4	3	4	4	4	4	4
chr01_6073226	chr01	6073226	candidate_SNP:6073225-6073226	4	4	4	4	4	3	4	3	4	4	4	4	4	4	4	4	4	4	4	4	4	4	4	4	3	4	4	4	4	4	4	4	4	4	4	4	4	3	4	4	4	4	4	4	3	4
chr01_6097814	chr01	6097814	solcap_snp_c1_13307	NA	3	2	NA	0	3	3	2	4	2	4	1	1	2	4	4	1	4	4	4	4	2	3	4	3	4	4	4	4	4	4	0	4	0	2	4	3	0	4	3	3	4	3	4	1	3
chr01_6098379	chr01	6098379	candidate_SNP:6098378-6098379	4	4	4	4	2	3	4	3	4	2	3	4	4	4	4	4	3	3	4	4	4	4	4	4	4	3	4	2	4	4	4	2	4	4	4	4	4	2	4	4	4	4	4	3	4	3
chr01_6105530	chr01	6105530	candidate_SNP:6105529-6105530	4	3	3	2	1	2	3	2	4	2	3	2	3	4	4	2	3	3	4	4	3	3	3	2	3	2	3	1	2	3	3	2	3	1	3	2	3	1	4	4	2	3	3	4	2	3
chr01_6123193	chr01	6123193	candidate_SNP:6123192-6123193	4	4	4	4	4	4	4	4	4	4	4	4	4	4	4	4	4	4	4	4	4	4	4	4	4	4	4	4	4	2	3	4	4	4	4	4	4	4	4	4	4	4	4	4	4	4
chr01_6136781	chr01	6136781	candidate_SNP:6136780-6136781	4	4	3	4	3	3	4	3	4	1	3	3	3	4	3	4	3	4	4	4	4	3	4	3	4	4	2	4	2	4	4	3	4	2	2	1	4	3	4	4	3	4	3	3	1	1
chr01_6138101	chr01	6138101	solcap_snp_c2_45080	4	4	3	4	4	4	4	4	4	3	3	3	3	4	4	4	4	4	4	4	4	3	4	4	4	4	2	4	4	4	4	3	4	3	3	4	4	4	4	4	3	4	3	4	3	4
chr01_6152430	chr01	6152430	solcap_snp_c2_45043	2	3	1	3	0	1	0	2	1	1	0	0	2	3	0	2	0	1	2	0	0	0	3	2	0	4	0	0	0	1	3	0	1	2	1	1	2	0	1	0	2	0	1	0	0	0
chr01_6162823	chr01	6162823	solcap_snp_c2_45045	4	4	3	4	4	3	3	3	3	3	3	3	3	3	2	4	4	4	2	2	2	3	4	4	1	4	2	4	3	4	4	4	3	4	2	3	4	4	3	2	4	3	3	2	3	2
chr01_6181590	chr01	6181590	candidate_SNP:6181589-6181590	4	3	2	3	3	4	2	4	0	3	1	2	2	4	1	3	1	2	3	3	3	3	2	3	4	2	2	3	4	2	2	3	4	1	2	4	2	4	3	4	3	3	1	1	2	4
chr01_6183443	chr01	6183443	ST4.03ch01_5468170	3	3	3	2	3	4	3	4	2	4	2	4	3	3	2	3	3	1	3	2	2	3	2	3	4	3	4	3	4	3	4	4	4	2	4	4	4	1	3	4	3	4	3	3	4	3
chr01_6183454	chr01	6183454	ST4.03ch01_5468181	2	1	1	1	0	1	1	1	0	0	1	1	1	2	0	2	0	1	3	2	2	1	2	1	1	3	1	0	2	2	1	0	2	1	2	2	1	0	1	2	1	0	0	0	0	2
chr01_6185593	chr01	6185593	candidate_SNP:6185592-6185593	2	2	3	2	0	2	2	2	4	0	3	2	2	3	1	2	3	3	4	2	1	2	2	3	2	3	2	1	2	2	3	0	1	2	2	3	3	1	2	2	3	1	1	1	0	4
chr01_6212693	chr01	6212693	solcap_snp_c2_45061	4	3	2	4	1	3	3	3	3	1	3	3	3	3	2	4	4	4	4	2	4	3	3	3	2	4	2	4	3	4	4	2	4	2	3	3	3	4	4	3	2	3	1	1	2	4
chr01_6216570	chr01	6216570	solcap_snp_c2_45064	2	1	1	1	0	1	1	1	0	0	1	1	1	2	0	1	0	1	3	1	1	1	2	1	1	2	2	0	1	2	1	0	2	1	2	2	1	0	1	2	2	0	0	0	0	2
chr01_6218999	chr01	6218999	solcap_snp_c1_13290	2	1	1	1	0	1	1	1	0	0	2	1	1	2	0	1	1	1	3	1	2	1	2	2	1	1	2	0	0	1	1	0	2	1	2	3	1	0	1	2	1	0	0	0	0	2
chr01_6221572	chr01	6221572	candidate_SNP:6221571-6221572	1	1	1	1	0	2	0	1	0	0	0	0	1	1	0	1	0	1	1	0	0	0	1	1	0	2	0	0	0	1	1	0	0	1	0	1	1	0	0	0	1	0	0	0	0	0
chr01_6234688	chr01	6234688	solcap_snp_c2_45066	2	3	2	2	2	2	2	1	2	2	1	3	2	3	1	3	1	2	3	2	2	1	2	2	3	3	2	2	3	1	2	2	3	1	2	3	2	0	1	2	1	3	2	2	2	2
chr01_6242398	chr01	6242398	candidate_SNP:6242397-6242398	3	3	3	3	4	4	3	4	2	4	2	4	4	3	2	3	2	3	3	2	3	3	3	3	4	4	4	3	4	3	3	4	4	3	4	4	3	3	3	4	3	3	3	3	4	3
chr01_6242823	chr01	6242823	solcap_snp_c1_13297	3	3	3	2	1	1	4	2	4	2	3	2	3	4	4	2	3	3	4	4	3	3	3	1	3	3	3	2	2	2	2	1	2	2	3	1	4	1	2	3	3	3	3	4	2	3
chr01_6246368	chr01	6246368	candidate_SNP:6246367-6246368	3	4	4	4	4	3	4	3	4	4	4	4	4	4	4	4	4	4	4	4	3	3	4	4	3	4	4	4	4	3	3	4	3	4	4	4	4	2	2	3	4	4	4	4	3	4
chr01_6306394	chr01	6306394	candidate_SNP:6306393-6306394	4	4	4	4	3	3	4	3	4	3	4	4	4	4	4	4	3	4	4	3	4	4	4	4	4	4	4	3	3	4	4	3	4	4	4	4	4	3	4	4	4	4	4	4	4	3
chr01_6807976	chr01	6807976	candidate_SNP:6807975-6807976	4	2	4	4	1	3	3	2	3	2	1	2	3	3	4	4	4	3	4	3	3	4	4	3	3	2	2	3	3	3	4	1	4	3	2	3	2	2	4	2	2	2	2	3	4	3
chr01_6808622	chr01	6808622	candidate_SNP:6808621-6808622	4	4	4	4	4	4	4	4	4	4	4	4	4	4	4	3	4	4	4	4	4	4	4	3	4	4	4	4	3	3	3	4	3	4	4	4	4	4	4	4	4	4	4	4	3	4
chr01_6896778	chr01	6896778	candidate_SNP:6896777-6896778	4	3	4	2	3	3	4	3	4	3	4	3	3	3	4	3	3	3	3	4	3	4	4	3	4	3	4	3	3	3	4	4	3	3	4	2	4	4	4	4	3	4	4	4	3	4
chr01_6952825	chr01	6952825	solcap_snp_c2_27876	4	4	4	4	4	4	4	4	3	4	4	4	4	4	4	4	3	4	4	4	4	3	4	4	4	4	4	4	4	4	4	4	4	4	3	4	4	4	4	4	4	4	4	4	4	4
chr01_6952876	chr01	6952876	solcap_snp_c2_27877	4	4	4	4	3	4	4	4	4	3	3	3	4	4	4	4	4	4	4	4	2	4	3	4	4	4	4	4	4	4	4	4	4	1	2	4	4	4	4	4	3	4	4	4	4	4
chr01_6952900	chr01	6952900	solcap_snp_c2_27878	4	3	4	4	1	4	3	4	4	2	3	3	4	3	4	4	4	4	4	2	1	4	3	2	4	4	2	4	4	3	3	0	4	1	2	4	3	4	4	4	3	4	2	4	4	4
chr01_6953278	chr01	6953278	solcap_snp_c2_27882	3	2	3	2	3	3	3	3	3	4	3	3	2	3	3	2	2	2	4	1	3	3	4	2	3	2	3	2	3	3	3	4	2	3	3	3	2	3	4	3	2	2	3	2	2	4
chr01_6953291	chr01	6953291	solcap_snp_c2_27883	4	4	4	3	3	4	4	4	4	4	4	3	4	4	4	4	4	4	4	4	3	4	4	3	4	3	4	3	4	4	4	4	2	4	4	3	4	4	4	4	4	3	4	4	3	4
chr01_6953419	chr01	6953419	solcap_snp_c2_27885	4	4	4	4	4	4	4	4	3	4	4	4	4	4	4	4	3	4	4	3	3	4	3	4	4	4	3	4	4	4	3	4	4	4	4	4	3	4	4	4	4	3	4	4	4	4
chr01_7025123	chr01	7025123	solcap_snp_c1_8608	3	3	3	3	4	3	3	3	0	3	2	4	3	3	1	3	1	2	3	2	2	3	3	3	2	3	3	3	4	3	3	4	4	3	3	4	2	3	3	4	3	2	2	1	4	3
chr01_7025574	chr01	7025574	candidate_SNP:7025573-7025574	4	4	4	4	4	4	4	4	3	4	4	4	4	4	4	4	3	4	4	4	4	4	4	4	4	4	4	4	4	4	4	4	4	4	3	4	4	4	4	4	4	4	4	4	4	4
chr01_7067191	chr01	7067191	candidate_SNP:7067190-7067191	4	4	4	4	4	4	4	4	4	4	3	4	4	4	4	4	4	3	4	4	3	4	4	4	4	3	4	4	4	4	4	4	4	4	4	4	4	4	4	4	4	4	4	3	4	4
chr01_7090014	chr01	7090014	ST4.03ch01_6217468	3	2	2	3	4	4	4	4	0	3	3	4	3	3	1	3	1	3	3	3	3	3	3	3	3	4	4	3	4	3	4	4	4	3	2	4	3	2	3	3	3	2	2	3	4	3
chr01_7093704	chr01	7093704	ST4.03ch01_6221158	2	3	2	3	4	3	4	3	4	4	4	4	2	3	4	3	4	2	3	4	4	4	3	3	4	2	4	4	4	3	3	4	4	2	4	2	4	4	4	4	3	3	4	4	4	4
chr01_7151101	chr01	7151101	solcap_snp_c2_27896	3	4	2	3	2	2	4	1	4	3	4	4	3	3	3	3	3	4	3	4	3	4	4	3	4	2	4	3	4	3	3	2	4	3	4	4	3	3	4	4	3	4	4	3	2	3
chr01_7151828	chr01	7151828	solcap_snp_c2_27897	3	2	4	2	1	4	4	4	4	3	4	3	3	2	4	2	4	3	4	4	4	2	1	3	4	3	3	2	2	3	3	3	2	4	4	3	4	4	1	3	4	2	2	4	3	4
chr01_7154282	chr01	7154282	candidate_SNP:7154281-7154282	2	3	3	2	2	4	4	4	4	4	1	1	4	3	4	3	4	3	3	4	2	3	3	2	3	3	4	2	0	4	4	1	1	1	1	1	4	4	3	2	2	3	4	4	3	1
chr01_7184709	chr01	7184709	solcap_snp_c2_27899	1	1	2	1	2	2	1	3	0	1	1	1	1	1	1	1	1	1	2	0	1	0	1	2	0	2	0	1	0	1	1	2	0	3	2	2	1	1	0	0	2	0	0	1	1	2
chr01_7184764	chr01	7184764	solcap_snp_c2_27900	2	2	4	2	3	3	2	3	3	3	3	2	3	2	4	3	3	3	3	2	3	1	2	3	1	3	1	3	1	3	3	3	0	4	2	2	3	2	1	0	3	2	2	4	1	3
chr01_7186193	chr01	7186193	solcap_snp_c2_27902	1	1	3	1	2	2	1	2	0	2	1	1	1	1	1	1	1	1	2	0	1	0	1	2	0	3	0	1	1	1	1	2	0	3	2	1	1	1	0	0	2	0	0	1	1	2
chr01_7313599	chr01	7313599	candidate_SNP:7313598-7313599	4	4	4	4	4	4	4	4	4	4	4	4	4	4	4	4	4	4	4	4	4	4	4	4	4	4	4	4	4	3	3	4	4	4	4	4	4	4	4	4	4	4	4	4	3	4
chr01_7396779	chr01	7396779	candidate_SNP:7396778-7396779	3	4	4	4	4	3	4	4	4	4	3	3	4	3	4	4	4	4	4	4	4	2	4	4	2	4	2	4	3	4	4	4	2	4	4	3	4	4	3	2	4	4	4	4	4	3
chr01_7476762	chr01	7476762	candidate_SNP:7476761-7476762	3	1	4	2	2	3	1	2	2	3	3	2	3	3	4	2	3	3	2	2	2	2	2	3	3	1	3	3	1	2	2	1	2	4	4	3	2	2	2	2	2	3	1	4	2	4
chr01_7497599	chr01	7497599	candidate_SNP:7497598-7497599	3	4	3	2	4	3	4	3	0	4	4	4	2	4	1	1	2	3	4	2	3	3	2	2	2	4	4	3	4	2	3	4	4	3	4	4	4	3	3	4	3	3	3	2	4	3
chr01_7501568	chr01	7501568	solcap_snp_c2_53842	2	3	3	3	4	4	4	4	2	4	2	3	3	2	2	3	1	3	3	2	3	2	3	3	2	4	2	3	3	3	3	4	2	3	3	3	3	3	2	2	3	3	3	2	4	3
chr01_7509642	chr01	7509642	ST4.03ch01_6797972	1	1	3	1	2	2	1	2	0	2	1	1	1	1	1	1	1	1	2	0	1	0	1	2	0	2	0	1	1	1	1	2	0	3	2	2	1	1	0	0	2	0	0	1	1	2
chr01_7540788	chr01	7540788	candidate_SNP:7540787-7540788	4	4	4	4	4	4	4	4	4	4	4	4	4	4	4	4	4	4	4	4	4	4	4	4	4	4	4	4	4	4	4	4	4	4	4	4	4	4	4	4	3	4	3	4	4	4
chr01_7582409	chr01	7582409	candidate_SNP:7582408-7582409	3	3	4	4	4	4	4	4	3	2	1	3	4	2	4	4	3	4	4	4	1	4	4	4	3	4	2	4	4	4	4	2	3	4	2	3	4	2	4	3	4	4	3	4	4	3
chr01_7802542	chr01	7802542	ST4.03ch01_7132792	4	4	4	4	4	2	2	3	3	3	4	4	3	4	3	4	4	4	4	4	4	4	4	4	3	4	2	3	4	4	4	4	4	4	4	4	2	4	4	4	4	3	3	3	4	4
chr01_7835604	chr01	7835604	solcap_snp_c2_48154	2	2	0	2	3	1	2	0	3	4	2	4	3	3	3	2	0	1	2	1	3	2	3	1	2	1	4	1	2	3	3	4	4	0	3	2	2	3	3	4	1	3	2	1	3	2
chr01_7889337	chr01	7889337	ST4.03ch01_7268301	4	4	4	4	4	4	4	4	4	4	3	4	4	4	4	4	4	3	4	4	4	4	4	4	4	3	4	3	4	4	4	4	4	4	4	4	4	4	4	4	4	4	4	3	4	4
chr01_7894396	chr01	7894396	candidate_SNP:7894395-7894396	1	4	NA	4	4	0	1	0	4	4	4	3	4	4	NA	4	4	4	2	2	4	2	0	4	2	4	4	4	4	3	1	4	3	NA	4	4	4	2	1	2	0	4	1	3	3	4
chr01_7915000	chr01	7915000	ST4.03ch01_7294806	4	4	4	4	4	3	4	3	3	3	4	4	3	4	3	4	4	4	4	4	3	4	4	4	3	4	3	4	4	4	4	4	4	4	4	4	4	4	4	4	4	3	3	3	4	4
chr01_8032794	chr01	8032794	candidate_SNP:8032793-8032794	3	3	3	3	4	4	2	4	1	4	2	4	1	2	1	3	2	3	3	1	3	2	3	3	1	3	4	2	4	2	2	4	3	3	4	4	2	2	3	4	2	3	2	2	4	3
chr01_8087194	chr01	8087194	candidate_SNP:8087193-8087194	2	3	3	3	4	4	2	4	2	4	3	4	2	3	2	3	1	3	3	2	4	1	2	3	3	3	4	2	4	2	2	4	3	4	4	4	2	3	2	2	4	3	2	2	4	3
chr01_8137991	chr01	8137991	candidate_SNP:8137990-8137991	4	4	4	4	4	4	4	4	3	3	4	4	3	4	2	4	4	4	4	4	4	4	4	4	3	4	4	4	4	4	4	4	4	4	4	4	4	4	4	4	4	3	4	3	4	4
chr01_8195981	chr01	8195981	candidate_SNP:8195980-8195981	3	2	2	4	2	2	4	3	0	0	2	2	0	2	0	4	0	4	2	4	2	1	0	3	4	4	3	0	3	0	0	1	2	4	2	3	4	0	1	2	4	2	0	0	3	3
chr01_8196782	chr01	8196782	candidate_SNP:8196781-8196782	3	4	4	4	4	4	4	4	4	4	4	4	4	4	4	4	4	4	4	4	4	4	3	3	4	4	4	4	3	3	3	4	4	4	4	3	4	4	3	3	4	4	4	4	4	4
chr01_8223994	chr01	8223994	candidate_SNP:8223993-8223994	3	4	4	4	4	3	4	4	4	4	4	4	4	4	4	4	4	4	4	4	4	3	3	3	4	4	4	3	3	3	3	4	3	4	4	3	4	4	2	3	4	4	4	4	4	4
chr01_8377934	chr01	8377934	ST4.03ch01_7873478	4	3	2	3	4	4	4	4	3	4	3	4	4	3	2	3	3	1	4	3	3	4	2	3	2	3	4	3	3	3	3	3	4	3	4	3	3	3	4	4	3	4	4	3	4	3
chr01_8445587	chr01	8445587	candidate_SNP:8445586-8445587	4	3	3	4	4	4	4	4	3	4	2	4	4	3	3	3	3	3	4	2	3	4	4	3	3	4	4	3	4	3	2	4	4	2	4	4	3	3	4	4	3	4	4	4	4	3
chr01_8579970	chr01	8579970	candidate_SNP:8579969-8579970	4	4	4	3	4	3	3	3	4	4	4	4	4	4	4	3	4	3	3	0	4	4	4	4	3	4	4	4	4	4	4	4	3	4	4	4	4	3	4	4	4	4	4	4	3	4
chr01_8589599	chr01	8589599	candidate_SNP:8589598-8589599	4	4	4	4	4	4	4	4	4	4	4	4	4	4	4	4	4	4	4	4	3	4	4	4	4	4	4	4	4	4	4	4	4	4	4	4	4	4	4	4	4	4	4	4	4	4
chr01_8604059	chr01	8604059	solcap_snp_c1_11430	4	3	2	3	4	4	3	4	3	4	3	3	4	3	3	3	3	1	4	2	2	4	3	2	3	2	4	2	4	2	2	4	4	3	4	4	2	3	4	3	3	4	4	3	4	4
chr01_8713517	chr01	8713517	candidate_SNP:8713516-8713517	0	0	1	0	0	0	0	0	0	0	0	0	0	0	1	0	0	0	0	0	0	0	0	0	0	0	0	0	0	0	0	0	0	0	0	0	0	0	0	0	0	0	0	1	1	0
chr01_8907178	chr01	8907178	candidate_SNP:8907177-8907178	4	4	3	4	4	4	4	4	4	3	4	3	4	4	4	4	4	4	4	4	4	4	4	4	4	4	4	4	4	4	4	4	4	4	4	4	4	3	4	3	4	4	4	4	4	4
chr01_8938397	chr01	8938397	candidate_SNP:8938396-8938397	2	1	0	0	1	0	0	0	3	1	0	2	1	1	1	0	2	0	2	0	1	2	2	1	0	0	1	1	0	2	2	1	1	0	1	1	0	1	2	1	0	2	4	1	2	0
chr01_9087774	chr01	9087774	solcap_snp_c2_52709	2	2	4	1	1	2	0	2	4	4	3	1	3	1	4	1	4	2	2	3	3	3	4	3	2	1	2	4	2	3	2	2	1	1	3	1	2	3	3	1	1	3	4	4	2	3
chr01_9704779	chr01	9704779	candidate_SNP:9704778-9704779	4	4	4	4	4	4	4	4	4	4	4	4	4	4	4	4	4	4	4	4	4	4	4	4	4	4	4	4	4	4	4	4	4	4	4	4	4	4	4	4	4	4	4	4	4	4
chr01_9770507	chr01	9770507	solcap_snp_c2_2334	3	2	4	2	2	2	4	3	2	3	2	1	2	1	3	2	1	3	1	2	3	2	2	3	3	2	2	4	4	2	2	2	1	3	1	1	4	3	2	1	3	2	2	2	2	2
chr01_9770531	chr01	9770531	solcap_snp_c2_2333	3	2	2	1	2	2	2	3	1	2	0	1	1	0	2	1	1	0	1	1	2	2	2	2	2	1	0	2	4	1	1	1	1	2	1	1	1	2	2	1	2	2	1	1	2	1
chr01_9770858	chr01	9770858	solcap_snp_c2_2332	2	3	2	3	2	2	2	2	3	3	4	3	2	4	3	3	4	4	3	3	3	3	3	3	2	3	4	4	3	2	3	3	3	2	3	3	3	3	1	3	3	2	3	3	2	4
chr01_9844596	chr01	9844596	candidate_SNP:9844595-9844596	4	4	4	4	4	4	4	4	4	4	4	4	4	4	4	4	4	4	4	4	4	4	4	4	4	4	4	4	4	4	4	4	4	4	4	4	4	4	4	4	3	4	4	4	4	4
chr01_10010885	chr01	10010885	solcap_snp_c2_54760	4	3	2	4	4	4	4	4	3	4	3	4	4	3	3	4	3	1	4	4	4	4	4	4	3	4	4	2	4	3	3	4	4	3	4	4	2	3	4	4	2	4	4	3	4	4
chr01_10210257	chr01	10210257	ST4.03ch00_28996096	3	4	3	4	4	4	2	4	3	4	4	4	4	4	4	4	4	4	4	4	4	4	4	4	4	4	4	4	4	4	4	3	4	4	4	4	3	4	4	4	4	4	3	4	4	4
chr01_10499373	chr01	10499373	solcap_snp_c1_15241	4	4	2	2	2	3	3	3	4	2	2	4	4	4	3	3	2	3	4	2	3	4	3	3	3	4	3	1	4	4	3	3	4	3	4	4	2	3	4	4	3	4	4	4	4	1
chr01_10541573	chr01	10541573	candidate_SNP:10541572-10541573	4	3	4	4	4	4	4	4	4	4	4	4	4	4	4	4	4	3	4	4	4	4	4	4	4	4	4	4	4	4	4	4	4	4	4	4	4	4	4	4	3	4	4	4	4	4
chr01_10542399	chr01	10542399	candidate_SNP:10542398-10542399	4	4	4	4	4	4	3	4	4	4	4	4	4	4	4	4	4	4	4	4	4	4	4	4	4	4	NA	4	4	4	4	4	NA	4	4	4	3	4	NA	4	4	4	4	4	4	4
chr01_10656195	chr01	10656195	solcap_snp_c2_53334	3	4	2	4	2	4	4	4	4	4	4	4	3	4	3	4	4	4	4	4	4	4	3	4	4	4	4	4	4	4	4	2	4	4	4	4	3	4	4	4	4	3	4	3	3	4
chr01_10766423	chr01	10766423	ST4.03ch01_43468565	4	3	1	2	4	4	3	4	3	4	1	3	4	2	3	2	3	0	4	2	0	3	3	3	2	2	1	1	2	3	3	4	1	2	3	3	2	2	3	4	2	4	4	2	2	2
chr01_10821096	chr01	10821096	solcap_snp_c2_49044	2	0	1	0	1	1	0	1	0	0	0	0	2	1	0	0	1	1	1	1	0	1	1	0	0	0	0	1	0	0	0	1	0	0	0	0	1	3	0	0	0	1	1	1	1	3
chr01_10822585	chr01	10822585	solcap_snp_c1_14512	4	1	1	1	3	2	0	2	2	3	3	3	3	3	2	2	2	1	3	2	3	4	3	0	1	2	3	1	0	3	3	4	4	0	3	0	1	2	4	2	0	3	3	2	3	2
chr01_10918192	chr01	10918192	solcap_snp_c2_49031	2	0	2	0	2	1	0	1	0	1	0	1	1	0	1	0	2	0	0	0	0	0	1	0	0	0	0	1	0	0	0	2	0	0	0	0	1	1	0	1	0	2	0	1	1	2
chr01_10922797	chr01	10922797	solcap_snp_c2_49042	1	2	2	3	3	2	2	3	1	2	0	3	2	0	2	2	1	1	1	2	0	0	1	3	2	2	0	1	3	1	1	2	1	3	1	3	2	2	0	3	2	2	1	2	2	3
chr01_10923978	chr01	10923978	candidate_SNP:10923977-10923978	4	4	4	3	4	4	4	4	4	4	4	4	4	4	4	4	4	2	4	4	3	4	4	4	4	3	4	3	3	4	4	4	4	3	4	3	4	4	4	4	3	4	4	4	4	4
chr01_10925976	chr01	10925976	solcap_snp_c1_14511	4	3	2	3	4	4	1	4	3	4	3	4	4	3	3	3	3	1	4	3	2	4	3	3	3	3	3	1	3	3	3	4	4	3	4	3	1	3	4	4	2	4	4	3	4	3
chr01_10929595	chr01	10929595	candidate_SNP:10929594-10929595	3	2	2	3	3	3	1	3	3	3	3	4	3	3	3	3	3	1	3	2	2	3	3	3	2	3	2	1	2	3	2	3	3	1	3	3	1	3	3	3	2	4	3	2	3	2
chr01_11126333	chr01	11126333	ST4.03ch01_43193088	4	3	4	4	4	4	3	4	4	4	4	4	4	4	4	4	4	2	4	4	2	4	4	4	4	4	3	4	4	4	4	4	4	4	4	4	3	4	4	4	2	4	4	4	4	4
chr01_11139408	chr01	11139408	solcap_snp_c2_50030	4	2	4	3	4	4	3	4	4	4	4	4	3	3	4	4	4	2	4	4	3	4	4	4	4	4	2	2	4	4	4	4	4	3	4	3	3	4	4	4	2	3	4	4	4	4
chr01_11651093	chr01	11651093	PotVar0134709	4	4	3	4	4	4	4	4	2	4	3	4	4	3	3	4	3	4	4	3	4	4	3	3	3	4	4	3	4	2	2	4	4	4	4	4	3	3	4	4	4	4	4	4	4	3
chr01_11843166	chr01	11843166	candidate_SNP:11843165-11843166	4	4	4	3	4	4	3	4	4	4	4	4	4	4	4	3	4	2	4	4	4	4	4	4	4	3	4	1	4	4	4	4	4	4	4	3	3	4	4	4	3	4	4	4	4	4
chr01_11870964	chr01	11870964	candidate_SNP:11870963-11870964	4	0	2	0	4	4	3	4	0	4	0	4	4	0	3	0	3	0	4	2	2	4	3	2	2	0	NA	1	3	0	0	4	4	3	4	1	1	2	4	4	1	4	4	2	4	3
chr01_12643802	chr01	12643802	solcap_snp_c2_53521	0	0	2	0	3	1	1	1	0	1	0	1	2	0	3	0	1	0	1	1	2	1	2	1	1	0	0	1	1	0	0	1	1	2	1	1	2	1	1	1	1	1	1	1	1	1
chr01_12747501	chr01	12747501	solcap_snp_c2_43984	4	4	3	4	3	4	3	4	4	4	4	4	4	4	4	4	4	4	3	3	4	4	4	4	4	4	4	4	4	4	4	4	4	3	3	4	4	4	4	4	3	4	4	4	4	3
chr01_12753563	chr01	12753563	candidate_SNP:12753562-12753563	4	4	4	4	4	4	3	4	4	4	4	4	4	4	4	4	4	4	4	3	4	4	4	4	4	4	4	4	4	4	4	4	4	3	4	4	4	4	4	4	4	4	4	4	4	4
chr01_12770177	chr01	12770177	solcap_snp_c1_12938	4	3	2	4	4	4	3	4	3	4	3	4	4	3	3	4	3	3	4	3	4	4	3	3	3	4	4	2	3	3	3	4	4	4	4	4	2	3	4	4	3	4	4	3	4	3
chr01_12770327	chr01	12770327	solcap_snp_c2_43981	4	3	2	3	3	4	1	4	4	4	3	4	4	3	4	2	3	1	3	2	1	4	3	4	3	3	3	1	2	4	3	4	4	2	3	3	2	3	4	4	2	4	4	3	4	2
chr01_12917838	chr01	12917838	solcap_snp_c2_43970	1	0	1	0	2	1	0	0	0	1	0	1	3	0	1	0	1	0	0	0	2	1	1	1	1	0	0	1	0	0	0	1	1	0	1	1	2	1	1	0	0	1	2	1	1	1
chr01_12918349	chr01	12918349	solcap_snp_c1_12926	4	4	4	3	4	4	4	4	4	4	4	4	4	4	4	3	4	3	4	4	3	4	4	4	4	3	4	4	4	4	4	4	4	2	4	3	4	4	4	4	3	4	4	4	4	4
chr01_12919202	chr01	12919202	ST4.03ch01_13546553	2	0	1	0	1	2	0	2	0	1	0	1	3	0	2	1	2	1	0	0	2	1	2	1	2	0	1	2	1	0	0	1	1	1	1	1	1	1	1	1	0	1	2	1	1	2
chr01_12919593	chr01	12919593	solcap_snp_c2_43973	1	0	4	0	1	2	1	1	0	0	0	1	3	0	2	0	2	0	0	1	2	1	2	2	1	0	1	1	3	1	0	2	1	0	1	2	3	2	2	1	0	2	0	1	2	4
chr01_12995990	chr01	12995990	candidate_SNP:12995989-12995990	4	4	3	4	3	4	3	4	4	4	4	4	4	4	4	4	4	4	3	2	4	4	4	4	4	4	4	4	4	4	4	4	4	2	3	4	4	4	4	4	3	4	4	4	4	3
chr01_13003997	chr01	13003997	candidate_SNP:13003996-13003997	2	4	4	4	4	4	4	4	4	4	0	3	3	2	4	4	4	4	3	4	3	2	4	4	4	4	2	4	4	4	4	4	2	4	4	4	4	4	4	4	4	4	4	4	3	4
chr01_13027433	chr01	13027433	solcap_snp_c1_8906	4	3	1	3	3	4	1	4	4	4	3	4	4	2	4	3	4	2	3	3	2	4	3	3	4	3	3	1	3	3	3	4	4	1	3	3	1	4	4	4	1	4	4	3	4	2
chr01_13027994	chr01	13027994	solcap_snp_c1_8908	4	3	1	3	4	4	2	4	4	4	3	4	4	2	4	3	4	1	4	4	3	4	3	3	4	3	3	1	2	3	3	4	4	2	4	3	1	4	4	4	2	4	4	3	4	3
chr01_13028845	chr01	13028845	ST4.03ch01_13656767	4	3	4	3	4	3	4	3	4	2	4	3	3	4	3	3	3	3	2	3	2	3	3	2	3	2	3	4	1	3	3	3	3	4	3	2	4	4	2	3	4	4	3	4	2	4
chr01_13037591	chr01	13037591	candidate_SNP:13037590-13037591	4	4	3	4	4	4	4	4	4	4	4	4	4	4	4	4	4	4	3	3	4	4	4	4	4	4	4	4	4	4	4	4	4	3	4	4	4	4	4	4	3	4	4	4	4	4
chr01_13042392	chr01	13042392	candidate_SNP:13042391-13042392	4	4	2	4	3	4	0	4	4	4	3	4	4	3	4	3	4	2	2	4	2	4	3	4	4	3	1	1	4	3	3	4	4	1	4	4	1	4	4	4	3	4	4	3	4	3
chr01_13740478	chr01	13740478	solcap_snp_c2_49729	4	3	2	3	4	4	2	4	4	4	1	4	4	2	4	3	4	2	4	4	2	4	2	3	4	3	3	2	3	3	3	4	4	3	4	3	1	4	4	4	2	4	4	3	4	3
chr01_13740835	chr01	13740835	solcap_snp_c2_49732	0	3	4	4	3	4	4	4	3	3	4	4	4	1	4	4	3	4	4	4	4	1	1	4	4	4	4	4	4	3	3	4	2	4	3	4	4	3	1	3	4	3	2	3	3	4
chr01_13741447	chr01	13741447	ST4.03ch01_41859834	4	4	3	4	4	4	3	4	4	4	4	4	4	4	4	4	4	4	3	3	4	4	4	4	4	4	4	4	4	4	4	4	4	2	4	4	4	4	4	4	4	4	4	4	4	3
chr01_13746383	chr01	13746383	candidate_SNP:13746382-13746383	4	4	4	4	4	4	4	4	4	4	3	4	4	4	4	4	4	4	4	4	4	4	4	4	4	4	3	4	4	4	4	4	4	4	4	4	4	4	4	4	4	4	4	4	4	4
chr01_13826803	chr01	13826803	solcap_snp_c1_14648	3	2	2	2	3	3	2	3	3	3	1	3	2	2	3	2	4	2	2	3	2	2	3	3	3	3	2	1	2	3	3	4	3	2	3	3	2	4	4	4	2	3	3	2	3	3
chr01_13826932	chr01	13826932	solcap_snp_c2_49720	3	3	3	3	3	4	3	4	3	4	2	3	3	3	3	3	4	3	3	4	3	3	4	3	4	3	3	3	3	3	3	4	3	3	3	4	3	4	4	4	3	3	3	3	3	3
chr01_13828765	chr01	13828765	solcap_snp_c2_49724	4	3	3	3	3	3	2	3	3	3	4	4	4	3	4	3	4	3	2	3	3	4	3	3	3	3	3	2	2	3	3	4	4	2	3	3	1	4	4	4	3	3	3	3	4	3
chr01_13828883	chr01	13828883	solcap_snp_c2_49726	4	3	3	3	4	3	2	3	3	3	4	4	4	3	4	3	4	2	3	3	2	4	3	3	3	2	4	3	3	3	3	4	4	2	3	2	1	4	4	4	2	3	3	3	4	2
chr01_13833466	chr01	13833466	ST4.03ch01_41954333	4	3	4	3	4	2	4	3	3	3	4	3	4	4	3	3	4	4	4	4	4	4	4	4	3	3	4	3	3	3	3	4	4	2	4	3	4	4	4	4	3	3	3	3	4	4
chr01_13835994	chr01	13835994	candidate_SNP:13835993-13835994	3	4	3	4	3	4	4	4	4	4	1	3	1	2	3	4	4	4	2	4	3	2	3	4	4	4	2	4	4	4	4	3	3	4	4	4	3	4	4	4	4	3	4	3	2	4
chr01_13853596	chr01	13853596	candidate_SNP:13853595-13853596	0	2	3	3	2	2	3	2	0	2	1	2	1	1	2	3	3	4	3	3	2	1	1	3	1	3	2	3	2	3	2	2	2	3	2	3	3	2	2	2	3	0	1	1	1	4
chr01_13857879	chr01	13857879	solcap_snp_c1_14654	4	3	1	3	3	3	0	4	3	4	4	3	4	3	4	3	4	2	2	2	3	4	3	4	3	3	3	2	4	3	3	4	4	3	3	4	1	2	4	3	3	4	4	3	4	2
chr01_13859718	chr01	13859718	solcap_snp_c2_49728	0	2	0	3	1	2	0	3	2	3	0	1	1	0	3	3	3	2	2	2	1	1	1	3	2	3	1	2	3	1	1	2	2	2	2	3	0	2	2	2	2	1	2	1	1	2
chr01_13902384	chr01	13902384	candidate_SNP:13902383-13902384	3	3	0	1	2	1	0	3	2	4	0	1	3	2	3	1	4	0	3	2	1	3	1	3	2	1	1	2	4	3	3	4	3	0	3	1	0	3	4	3	0	2	3	2	2	1
chr01_13988793	chr01	13988793	candidate_SNP:13988792-13988793	4	3	4	4	4	4	4	4	4	4	4	4	4	4	4	4	4	3	4	4	4	4	4	4	4	4	4	4	4	4	4	4	4	4	4	4	4	4	4	4	3	4	4	4	4	4
chr01_14395811	chr01	14395811	solcap_snp_c2_57898	2	3	4	4	3	4	4	4	3	3	4	4	4	3	4	4	3	4	4	4	4	3	3	2	3	4	4	4	2	3	3	3	3	4	3	3	4	3	3	3	4	3	3	3	3	4
chr01_14542828	chr01	14542828	solcap_snp_c2_711	4	3	4	2	2	1	4	2	2	1	4	2	3	4	2	1	1	3	2	2	2	3	2	3	2	0	3	2	1	2	2	1	2	3	2	2	4	3	2	2	3	1	1	3	3	2
chr01_14835874	chr01	14835874	solcap_snp_c1_226	2	3	4	4	3	4	4	4	3	3	4	4	4	3	4	4	3	4	4	4	4	3	3	2	3	4	4	4	2	3	3	3	2	4	3	3	4	3	3	3	4	3	3	3	3	4
chr01_14836489	chr01	14836489	PotVar0102236	3	4	3	4	4	4	4	4	4	4	4	4	3	4	3	4	4	4	4	4	4	4	3	4	4	4	4	4	4	4	4	4	4	4	4	4	3	4	4	4	4	4	4	3	3	4
chr01_14836517	chr01	14836517	PotVar0102235	4	2	3	2	1	1	3	2	2	1	4	3	3	4	1	1	2	3	2	2	3	3	3	3	2	2	3	2	2	3	3	1	3	3	1	2	4	2	2	2	3	2	2	3	3	1
chr01_14837848	chr01	14837848	PotVar0102189	0	3	2	4	4	4	4	4	4	2	4	3	3	3	4	4	4	4	4	4	4	3	2	3	2	3	4	4	3	3	2	3	3	4	3	3	2	3	2	3	4	2	3	2	2	4
chr01_14839778	chr01	14839778	solcap_snp_c2_694	4	4	3	4	3	4	3	4	4	4	4	4	4	4	4	4	4	4	3	3	4	4	4	4	4	4	4	4	4	4	4	4	4	3	3	4	4	4	4	4	4	4	4	4	4	3
chr01_15205319	chr01	15205319	solcap_snp_c2_35603	1	0	2	0	1	1	2	1	1	0	3	2	2	2	0	0	0	0	2	2	1	2	0	0	1	0	2	0	0	0	0	0	1	1	1	0	0	1	0	1	0	0	0	0	1	1
chr01_15206373	chr01	15206373	candidate_SNP:15206372-15206373	4	4	4	4	4	4	3	4	4	4	4	4	4	4	4	4	4	4	4	4	4	4	4	4	4	4	3	4	4	4	4	4	4	4	4	4	3	4	4	4	4	4	4	4	4	4
chr01_15207199	chr01	15207199	candidate_SNP:15207198-15207199	2	3	4	4	2	4	4	4	3	2	4	4	4	3	4	4	3	4	4	4	4	3	3	3	2	4	4	4	2	3	3	3	3	4	2	3	4	3	2	3	4	3	3	3	2	4
chr01_15212788	chr01	15212788	candidate_SNP:15212787-15212788	4	4	3	4	3	4	4	4	4	4	4	4	4	4	4	4	4	4	3	3	4	4	4	4	4	4	4	4	4	4	4	4	4	4	3	4	4	4	4	4	4	4	4	4	4	3
chr01_15220752	chr01	15220752	candidate_SNP:15220751-15220752	4	4	3	4	3	4	3	4	4	4	4	4	4	4	4	4	4	4	3	3	4	4	4	4	4	4	4	4	4	4	4	4	4	3	3	4	4	4	4	4	4	4	4	4	4	4
chr01_16599143	chr01	16599143	solcap_snp_c1_8362	4	3	2	4	4	4	3	4	4	4	3	4	4	3	4	4	4	3	4	4	4	4	3	4	4	4	4	2	4	3	3	4	4	3	4	4	3	4	4	4	2	4	4	3	4	3
chr01_16607196	chr01	16607196	candidate_SNP:16607195-16607196	4	4	3	4	2	4	3	4	4	4	4	4	3	4	4	4	4	4	3	2	4	4	4	4	4	4	4	4	4	4	3	4	4	3	2	4	4	4	4	4	4	4	4	4	3	3
chr01_16608791	chr01	16608791	candidate_SNP:16608790-16608791	4	4	4	4	4	4	4	4	4	4	4	3	4	4	4	4	4	4	4	4	4	4	4	4	4	4	4	4	4	3	4	4	4	4	4	4	4	4	4	4	4	4	4	4	4	4
chr01_16633586	chr01	16633586	candidate_SNP:16633585-16633586	4	4	3	4	3	4	2	4	4	4	4	4	4	4	4	4	4	4	3	3	4	4	4	4	4	4	4	4	4	4	4	4	4	3	3	4	4	4	4	4	4	4	3	4	4	4
chr01_17079184	chr01	17079184	candidate_SNP:17079183-17079184	3	3	NA	3	4	2	4	4	4	2	4	4	2	4	3	3	3	4	1	3	4	2	3	3	1	0	4	4	3	4	3	3	2	4	0	3	3	3	0	4	4	4	2	4	2	4
chr01_18390692	chr01	18390692	solcap_snp_c2_55113	4	4	3	4	3	4	3	4	4	4	4	4	4	4	4	4	4	4	3	3	4	4	4	4	4	4	4	4	4	4	4	4	4	3	3	4	4	4	4	4	4	4	4	4	4	3
chr01_18391427	chr01	18391427	ST4.03ch01_54579546	4	3	3	3	4	4	3	4	4	4	3	4	4	3	4	3	4	3	3	4	3	4	3	4	4	4	3	3	4	3	3	4	4	3	4	3	3	4	3	3	3	4	4	3	4	3
chr01_18506784	chr01	18506784	solcap_snp_c1_881	4	4	3	4	3	4	3	4	4	4	4	4	4	4	4	4	4	4	3	4	4	4	4	4	4	4	4	4	4	4	4	4	4	3	3	4	4	4	4	4	4	4	4	4	4	3
chr01_18507894	chr01	18507894	solcap_snp_c2_2910	4	3	1	3	3	4	1	4	4	4	3	4	4	3	4	3	4	3	2	3	2	4	3	4	4	4	3	2	4	2	3	4	4	1	3	3	1	4	4	3	1	4	4	3	4	2
chr01_19194410	chr01	19194410	solcap_snp_c2_2872	4	3	2	3	3	4	2	4	4	4	3	4	4	3	4	3	4	2	2	3	2	4	4	4	4	4	3	3	4	3	2	4	4	2	3	3	2	4	4	3	2	4	4	3	4	3
chr01_19194546	chr01	19194546	solcap_snp_c2_2873	1	1	0	2	1	3	1	3	1	2	0	1	2	0	1	1	2	1	1	2	1	1	2	2	1	2	0	0	1	0	0	2	2	0	2	1	2	2	2	1	0	0	0	0	1	2
chr01_19194620	chr01	19194620	solcap_snp_c2_2874	4	4	3	4	3	4	3	4	4	4	4	4	4	4	4	4	4	4	3	3	4	4	4	4	4	4	4	4	4	4	4	4	4	3	3	4	4	4	4	4	4	4	4	4	4	3
chr01_19230915	chr01	19230915	ST4.03ch01_55199878	4	4	3	4	3	4	3	4	4	4	4	4	4	4	4	4	4	4	3	3	4	4	4	4	4	4	4	4	4	4	4	4	4	3	4	4	4	4	4	4	4	4	4	4	4	3
chr01_19458548	chr01	19458548	solcap_snp_c2_55618	1	2	0	3	2	4	1	4	3	3	0	2	2	0	3	3	3	1	2	3	1	1	2	2	2	3	1	2	1	0	0	3	2	1	3	2	1	3	2	3	1	3	3	1	1	2
chr01_19571998	chr01	19571998	candidate_SNP:19571997-19571998	3	4	4	4	4	4	4	4	4	4	0	3	3	1	4	4	4	4	2	4	2	3	4	4	4	4	1	4	4	4	4	4	2	4	4	4	4	4	4	4	4	4	4	4	3	4
chr01_20535988	chr01	20535988	candidate_SNP:20535987-20535988	2	3	3	3	3	3	3	3	4	3	4	3	3	3	3	3	2	3	2	4	3	3	2	3	2	4	3	4	4	3	3	3	3	3	4	3	3	3	4	3	4	4	4	4	3	4
chr01_20807999	chr01	20807999	candidate_SNP:20807998-20807999	4	4	NA	3	3	4	4	4	3	4	4	3	4	4	3	3	3	2	4	3	4	4	4	3	4	4	4	2	4	4	4	3	3	4	4	3	4	3	4	3	4	3	3	4	4	4
chr01_21957271	chr01	21957271	solcap_snp_c1_11506	4	2	1	3	2	4	2	4	4	4	3	4	4	3	4	3	4	1	3	2	3	4	3	4	4	4	3	2	4	3	3	4	4	1	3	4	2	4	4	4	2	4	4	2	4	2
chr01_22053494	chr01	22053494	ST4.03ch01_42715188	4	3	4	3	4	3	4	3	3	3	4	4	4	4	3	3	4	4	4	4	4	4	4	4	3	3	4	3	3	4	4	4	4	3	4	3	4	4	4	4	3	3	3	3	4	4
chr01_22300080	chr01	22300080	solcap_snp_c2_32110	4	4	4	4	3	3	4	4	3	4	4	3	4	4	3	2	3	3	3	3	4	4	4	3	4	4	3	3	4	2	3	3	3	4	4	3	4	3	4	3	4	3	3	4	4	4
chr01_22300281	chr01	22300281	solcap_snp_c2_32112	4	3	2	4	4	4	4	4	4	4	4	4	4	2	4	4	4	3	4	4	4	4	3	4	4	4	4	1	4	3	3	4	4	3	4	4	3	4	4	4	2	4	4	3	4	4
chr01_22757582	chr01	22757582	candidate_SNP:22757581-22757582	4	3	2	4	4	4	4	4	4	4	4	4	4	4	4	4	4	3	4	4	4	4	4	4	4	4	4	3	4	4	4	4	4	3	4	4	4	4	4	4	2	4	4	3	4	4
chr01_23016065	chr01	23016065	ST4.03ch01_20549943	3	3	4	2	4	3	4	3	4	3	4	4	2	4	3	3	3	4	3	3	2	3	2	3	2	2	4	4	3	4	4	3	3	4	2	2	2	3	2	4	4	4	3	4	3	4
chr01_24491738	chr01	24491738	solcap_snp_c1_5477	3	2	2	2	2	4	3	4	2	3	2	2	3	2	2	2	2	2	2	3	3	2	3	2	2	2	2	2	1	2	1	3	2	2	3	2	2	3	3	2	3	2	2	2	2	3
chr01_24492324	chr01	24492324	ST4.03ch01_23656394	2	2	3	4	3	4	4	4	3	3	4	4	4	2	3	4	3	3	4	4	4	3	3	2	2	3	4	4	2	2	3	3	3	4	3	4	4	3	2	3	4	3	3	3	2	4
chr01_25120829	chr01	25120829	candidate_SNP:25120828-25120829	1	0	0	0	0	1	2	0	1	0	3	3	2	2	0	0	0	0	1	2	1	2	0	0	0	0	2	0	0	0	0	0	1	NA	0	0	0	0	0	1	0	0	0	0	1	0
chr01_25932783	chr01	25932783	candidate_SNP:25932782-25932783	4	4	4	4	3	4	4	4	4	4	4	4	4	4	4	4	4	4	3	3	4	4	4	4	4	4	4	4	3	4	4	4	4	3	4	4	4	4	4	4	4	4	4	4	4	3
chr01_25934391	chr01	25934391	candidate_SNP:25934390-25934391	4	3	1	3	3	4	1	4	3	4	4	4	4	3	4	3	4	1	4	3	3	4	3	4	4	4	4	2	4	4	3	4	4	1	3	2	2	4	4	4	3	4	4	3	4	1
chr01_26027819	chr01	26027819	ST4.03ch01_53698373	4	4	1	NA	2	4	1	4	4	4	3	4	4	3	4	2	4	2	4	1	1	4	2	4	4	4	3	2	4	4	3	4	4	3	3	1	2	4	4	4	0	4	4	3	4	3
chr01_26447191	chr01	26447191	candidate_SNP:26447190-26447191	4	3	2	3	4	4	2	4	4	4	3	4	4	3	4	3	4	2	4	4	2	4	2	4	4	4	4	1	4	3	3	4	4	1	4	3	0	4	4	4	2	4	4	3	4	3
chr01_26456775	chr01	26456775	candidate_SNP:26456774-26456775	4	3	2	3	3	4	1	4	4	4	3	4	4	3	4	3	4	3	3	3	2	4	3	4	4	4	3	2	4	3	3	4	4	1	3	3	1	4	4	4	1	4	4	3	4	2
chr01_26458393	chr01	26458393	candidate_SNP:26458392-26458393	4	4	3	4	3	4	3	4	4	4	4	4	4	4	4	4	4	4	3	3	4	4	4	4	4	4	4	4	4	4	4	4	4	3	3	4	4	4	4	4	4	4	4	4	4	3
chr01_26944680	chr01	26944680	candidate_SNP:26944679-26944680	4	4	2	4	3	4	3	4	4	4	4	4	4	4	4	4	4	4	3	4	4	4	4	4	4	4	4	4	4	4	4	4	4	3	3	4	4	4	4	4	4	4	4	4	4	3
chr01_27197405	chr01	27197405	ST4.03ch00_13903186	2	3	3	4	3	4	4	4	3	3	4	4	4	3	3	4	3	2	4	4	4	3	3	2	2	3	4	4	3	3	3	3	3	4	3	4	4	3	2	3	4	3	3	2	3	4
chr01_27197436	chr01	27197436	ST4.03ch00_13903155	2	3	3	4	3	4	4	4	3	3	4	4	4	3	3	4	3	2	4	4	4	3	3	2	2	3	4	4	3	3	3	3	3	4	3	4	4	3	2	3	4	3	3	2	3	4
chr01_27219985	chr01	27219985	candidate_SNP:27219984-27219985	4	4	3	4	3	4	3	4	4	4	4	4	4	4	4	4	4	4	3	3	4	4	4	4	4	4	4	4	4	4	4	4	4	3	3	4	4	4	4	4	4	4	4	4	4	4
chr01_27414468	chr01	27414468	ST4.03ch00_13700609	4	4	4	3	4	4	4	4	4	4	4	4	4	4	4	4	4	4	4	4	4	4	4	4	4	4	4	4	4	4	4	4	4	3	4	3	4	4	4	4	3	4	4	4	4	4
chr01_27587993	chr01	27587993	candidate_SNP:27587992-27587993	4	4	4	4	4	4	3	4	4	4	4	4	4	4	4	4	4	4	4	4	3	4	4	4	4	4	4	4	4	4	4	4	4	4	4	4	3	4	4	4	4	4	4	4	4	4
chr01_27645050	chr01	27645050	solcap_snp_c2_54355	2	3	3	3	2	3	2	3	3	3	1	3	0	2	2	3	2	4	1	1	1	1	2	3	2	2	0	3	3	4	4	3	2	3	2	2	2	2	2	4	4	2	2	4	2	3
chr01_27651127	chr01	27651127	solcap_snp_c2_54353	1	1	1	0	1	0	0	0	2	2	0	2	0	1	1	1	2	1	1	0	0	2	1	2	1	1	0	0	2	3	3	1	3	0	1	0	0	2	2	2	0	1	1	3	2	0
chr01_28283092	chr01	28283092	candidate_SNP:28283091-28283092	4	0	0	3	3	2	0	2	4	2	4	3	4	4	4	2	4	4	2	1	4	4	4	2	4	0	3	4	0	3	3	3	4	0	1	3	4	4	4	4	NA	4	4	NA	3	2
chr01_28488794	chr01	28488794	candidate_SNP:28488793-28488794	4	4	4	4	4	4	3	4	4	4	4	4	4	4	4	4	4	4	4	4	3	4	4	4	4	4	4	4	4	4	4	4	4	4	4	4	2	4	4	4	3	4	4	4	4	4
chr01_28553589	chr01	28553589	candidate_SNP:28553588-28553589	4	3	3	3	3	3	3	3	3	3	4	3	4	4	3	3	4	3	3	3	3	4	4	4	3	3	3	3	3	3	3	3	4	3	3	3	3	4	4	3	3	3	3	3	3	3
chr01_28691988	chr01	28691988	candidate_SNP:28691987-28691988	4	4	4	4	4	4	4	4	4	4	4	4	4	4	4	4	4	4	4	4	4	4	4	4	4	4	4	4	4	4	4	4	4	4	4	4	4	4	4	4	4	4	4	4	4	4
chr01_29130384	chr01	29130384	candidate_SNP:29130383-29130384	2	4	2	4	2	4	4	4	2	4	4	4	2	4	1	4	1	4	4	3	3	2	0	4	2	4	3	3	4	4	4	4	3	4	2	3	0	1	0	4	4	1	2	3	4	4
chr01_29155999	chr01	29155999	candidate_SNP:29155998-29155999	4	4	4	3	4	4	3	4	4	4	4	4	4	4	4	4	4	3	4	4	3	4	4	4	4	4	4	4	4	4	4	4	4	2	4	3	3	4	4	4	2	4	4	4	4	4
chr01_30110987	chr01	30110987	ST4.03ch01_16109449	4	4	3	4	3	4	1	4	4	4	4	4	4	4	4	4	4	4	3	3	3	4	4	4	4	4	4	4	4	4	4	4	4	3	3	4	2	4	4	4	4	4	4	4	4	3
chr01_30111362	chr01	30111362	solcap_snp_c2_44629	4	3	4	3	3	2	4	2	3	2	4	4	4	4	3	3	3	4	4	4	4	4	4	4	3	3	4	3	3	4	4	3	4	3	4	2	4	3	4	4	3	3	3	3	4	2
chr01_30394600	chr01	30394600	solcap_snp_c2_49855	4	4	4	4	4	4	3	4	4	4	4	4	4	4	4	4	4	4	4	4	3	4	4	4	4	4	4	4	4	4	4	4	4	4	4	4	3	4	4	4	4	4	4	4	4	4
chr01_30396380	chr01	30396380	solcap_snp_c2_49867	4	4	4	2	3	4	2	4	4	4	4	4	4	4	4	3	4	3	3	3	4	4	4	4	4	4	4	4	4	4	4	4	4	3	4	3	4	4	4	4	2	4	4	4	4	4
chr01_30898372	chr01	30898372	candidate_SNP:30898371-30898372	4	4	2	4	4	4	4	4	4	4	3	4	4	3	4	4	4	4	4	4	4	4	3	4	4	4	4	2	4	3	3	4	4	4	4	4	3	4	4	4	3	4	4	3	4	3
chr01_30905585	chr01	30905585	candidate_SNP:30905584-30905585	3	4	3	4	3	4	4	4	3	4	4	4	2	4	1	4	2	4	4	3	3	3	2	4	2	4	3	3	4	4	4	3	3	4	3	3	3	3	2	4	4	2	2	3	4	4
chr01_30906400	chr01	30906400	candidate_SNP:30906399-30906400	4	4	2	4	4	4	4	4	4	4	3	4	4	3	4	4	4	4	4	4	4	4	3	4	4	4	4	3	4	3	3	4	4	4	4	4	3	4	4	4	3	4	4	3	4	3
chr01_30939930	chr01	30939930	candidate_SNP:30939929-30939930	0	1	0	2	1	3	1	3	2	2	0	2	0	0	1	2	1	1	1	1	0	0	0	1	1	2	1	1	1	1	1	1	1	1	0	1	0	1	0	3	1	1	1	1	0	2
chr01_31358944	chr01	31358944	solcap_snp_c2_48570	4	4	4	4	4	4	3	4	4	4	4	4	4	4	4	4	4	4	4	4	4	4	4	4	4	4	4	4	4	4	4	4	4	4	4	4	3	4	4	4	4	4	4	4	4	4
chr01_31358989	chr01	31358989	solcap_snp_c2_48568	4	3	2	3	3	4	0	3	3	4	3	3	4	4	4	3	4	2	3	3	2	4	3	4	4	4	4	3	4	3	4	4	4	1	4	2	1	4	4	3	1	4	4	3	4	2
chr01_31362400	chr01	31362400	candidate_SNP:31362399-31362400	4	4	2	4	4	4	3	4	4	4	3	4	4	3	4	4	4	4	4	4	3	4	3	4	4	4	4	2	4	3	3	4	4	4	4	4	2	4	4	4	4	4	4	3	4	3
chr01_32209573	chr01	32209573	ST4.03ch01_18363231	4	2	3	4	4	4	2	4	4	4	3	4	4	4	4	4	4	2	4	4	3	4	2	4	4	4	4	2	4	3	3	4	4	3	4	4	1	4	4	4	2	4	4	3	4	4
chr01_32239405	chr01	32239405	solcap_snp_c2_53175	4	3	4	4	4	4	4	4	4	4	4	4	4	4	4	4	4	3	4	4	4	4	4	4	4	4	4	4	4	4	4	4	4	3	4	4	4	4	4	4	2	4	4	4	4	4
chr01_32239692	chr01	32239692	ST4.03ch01_18393203	4	4	3	4	3	4	3	4	4	4	4	4	4	4	4	4	4	4	4	3	4	4	4	4	4	4	4	4	4	4	4	4	4	3	3	4	4	4	4	4	4	4	4	4	4	3
chr01_32239740	chr01	32239740	ST4.03ch01_18393251	2	3	3	3	2	3	4	3	2	2	4	4	2	3	1	3	1	3	3	2	3	2	2	1	1	1	2	3	2	3	3	1	2	4	1	2	3	1	0	3	4	1	2	2	2	4
chr01_32240276	chr01	32240276	solcap_snp_c1_15521	2	3	4	4	3	4	4	4	3	3	4	4	4	2	4	4	3	2	4	4	4	3	3	2	3	3	4	4	2	3	3	2	3	4	2	4	4	3	2	3	4	2	3	3	2	4
chr01_32587026	chr01	32587026	solcap_snp_c2_53763	3	4	3	4	3	4	4	4	3	4	4	4	2	4	1	4	2	4	4	3	3	3	2	4	3	4	3	3	4	4	4	3	3	4	3	3	2	2	3	4	4	2	3	3	4	4
chr01_32591814	chr01	32591814	solcap_snp_c2_53759	2	2	0	2	1	1	0	2	2	2	0	2	0	2	1	2	1	2	1	0	0	1	1	3	2	2	1	1	2	2	3	1	2	1	1	1	0	1	2	3	1	2	2	2	2	0
chr01_32755038	chr01	32755038	solcap_snp_c2_56842	4	3	4	3	4	3	4	3	4	3	1	2	2	1	4	2	4	4	3	2	3	2	4	3	4	1	2	4	3	3	3	3	3	4	3	3	4	4	4	4	4	4	4	4	2	4
chr01_32756701	chr01	32756701	solcap_snp_c1_16425	4	3	3	4	3	3	3	3	3	4	4	3	4	4	4	4	4	3	3	2	4	4	4	4	4	4	4	4	4	4	4	4	4	2	3	4	4	4	4	3	3	4	4	4	4	3
chr01_32818400	chr01	32818400	candidate_SNP:32818399-32818400	1	1	4	2	2	3	4	4	3	1	1	3	2	1	4	2	2	3	1	2	3	2	2	0	2	1	2	4	1	3	2	2	1	4	2	3	4	2	2	3	4	3	3	2	0	4
chr01_32825776	chr01	32825776	solcap_snp_c2_53553	4	3	4	2	3	1	3	1	2	3	4	3	4	4	3	2	3	3	4	3	3	4	4	4	3	3	4	3	3	4	4	3	4	2	4	3	4	3	4	3	2	3	3	3	4	1
chr01_32895995	chr01	32895995	candidate_SNP:32895994-32895995	3	3	3	2	3	2	2	2	3	3	4	3	3	2	2	2	3	3	2	3	3	2	3	2	3	3	3	3	2	3	3	3	3	2	1	2	2	2	4	3	3	3	3	2	3	3
chr01_33659383	chr01	33659383	candidate_SNP:33659382-33659383	2	2	4	4	4	4	NA	NA	2	1	4	4	4	3	4	4	2	3	4	4	4	3	4	3	2	3	4	4	1	3	3	3	4	NA	2	4	NA	2	2	3	NA	3	2	2	2	NA
chr01_33716089	chr01	33716089	solcap_snp_c1_14664	4	3	1	2	3	2	0	2	2	3	3	3	4	3	2	2	3	2	3	2	2	4	3	4	3	3	4	1	3	3	4	4	4	0	2	2	1	2	4	3	0	2	3	2	4	0
chr01_33718797	chr01	33718797	solcap_snp_c2_49759	4	2	1	2	2	1	0	1	1	2	3	3	4	2	3	3	3	2	2	2	2	4	3	4	3	3	4	1	3	3	2	3	4	0	3	2	1	3	4	3	0	4	3	1	4	0
chr01_33719340	chr01	33719340	solcap_snp_c2_49758	0	2	3	3	2	3	4	2	2	2	1	2	0	1	1	3	1	3	2	1	3	0	1	1	2	1	1	3	1	2	2	1	1	4	1	2	3	1	0	3	4	1	2	2	0	4
chr01_34099957	chr01	34099957	candidate_SNP:34099956-34099957	0	0	0	0	0	0	0	0	0	0	0	1	0	0	0	1	0	0	1	0	0	0	0	1	0	0	1	0	0	1	1	0	1	0	0	0	0	0	0	1	0	0	0	0	0	0
chr01_34112792	chr01	34112792	candidate_SNP:34112791-34112792	4	4	0	2	1	4	0	4	4	4	3	4	4	3	4	3	4	3	2	1	1	4	3	4	4	4	4	2	4	3	3	4	4	1	1	3	0	4	4	4	1	4	4	3	4	0
chr01_34774393	chr01	34774393	candidate_SNP:34774392-34774393	4	4	3	4	3	4	3	4	4	4	4	4	4	4	4	4	4	4	3	3	4	4	4	4	4	4	4	4	4	4	4	4	4	3	3	4	4	4	4	4	4	4	4	4	4	3
chr01_34971396	chr01	34971396	solcap_snp_c2_45395	3	4	3	4	3	4	4	4	3	4	4	4	2	4	1	4	1	4	4	3	3	3	2	4	2	4	3	2	4	4	4	2	2	4	3	3	3	2	2	4	4	3	2	3	4	4
chr01_35398281	chr01	35398281	solcap_snp_c2_34938	4	2	4	3	2	1	0	1	2	2	4	4	4	4	2	2	3	4	4	3	4	4	4	4	3	3	4	1	3	4	4	3	4	0	4	2	3	3	4	3	0	2	2	3	4	2
chr01_35398310	chr01	35398310	solcap_snp_c2_34940	3	4	3	4	4	4	4	3	4	4	3	4	4	3	3	4	3	3	4	4	4	4	4	4	4	4	4	4	4	4	4	3	4	4	3	3	4	4	3	4	4	4	3	4	4	4
chr01_35402397	chr01	35402397	candidate_SNP:35402396-35402397	4	4	4	4	4	4	4	4	4	4	4	4	4	4	4	4	4	3	4	4	4	4	4	4	4	4	4	4	4	4	4	4	4	3	4	3	4	4	4	4	3	4	4	4	4	4
chr01_36352743	chr01	36352743	candidate_SNP:36352742-36352743	4	4	3	4	3	4	3	4	4	4	4	4	4	4	4	4	4	4	3	3	4	4	4	4	4	4	4	4	4	4	4	4	4	3	3	4	4	4	4	4	4	4	4	4	4	3
chr01_36364794	chr01	36364794	candidate_SNP:36364793-36364794	4	3	3	3	3	4	1	4	4	4	4	4	4	4	4	3	4	2	3	3	2	4	4	4	4	4	4	4	4	4	4	4	4	1	3	2	2	4	4	4	1	4	4	4	4	3
chr01_36497303	chr01	36497303	ST4.03ch01_41037082	4	4	3	4	3	4	3	4	4	4	4	4	4	4	4	4	4	4	3	3	4	4	4	4	4	4	4	4	4	4	4	4	4	3	3	4	4	4	4	4	4	4	4	4	4	3
chr01_36620071	chr01	36620071	PotVar0096600	4	3	4	3	4	2	4	3	3	3	4	4	4	4	3	3	4	4	4	4	4	4	4	4	3	3	4	3	3	4	4	4	4	3	4	3	4	4	4	4	3	4	3	2	4	4
chr01_36642383	chr01	36642383	candidate_SNP:36642382-36642383	4	3	2	3	4	3	2	3	3	4	3	2	4	3	4	3	4	3	4	3	2	4	3	4	4	4	4	1	4	2	2	4	4	2	4	3	2	4	4	3	2	4	4	3	4	3
chr01_36647145	chr01	36647145	candidate_SNP:36647144-36647145	4	4	4	4	4	4	4	4	4	4	4	4	4	4	4	4	4	4	4	4	4	4	4	4	4	4	4	4	4	4	4	4	4	4	4	4	4	4	4	4	3	4	4	4	4	4
chr01_41010353	chr01	41010353	ST4.03ch01_28300589	4	2	4	2	4	3	3	3	4	3	4	3	4	4	4	2	4	4	3	2	4	4	4	3	4	2	3	4	3	3	3	3	4	4	4	3	4	4	4	4	4	4	4	4	4	4
chr01_41015994	chr01	41015994	candidate_SNP:41015993-41015994	0	0	0	0	0	0	0	0	0	0	0	1	0	0	0	0	0	0	0	0	0	0	0	0	0	0	0	0	0	0	0	0	0	0	0	0	0	0	0	1	0	0	0	0	0	0
chr01_41606391	chr01	41606391	candidate_SNP:41606390-41606391	4	3	4	4	4	4	4	4	4	4	NA	4	4	4	4	4	4	2	4	4	4	4	4	4	4	4	4	4	4	4	4	4	4	3	4	4	4	4	4	4	3	4	4	4	4	4
chr01_41870384	chr01	41870384	candidate_SNP:41870383-41870384	3	3	4	3	4	3	3	3	4	3	4	4	4	3	4	3	4	4	3	3	4	4	3	3	3	2	3	4	3	4	4	3	4	4	3	3	3	4	4	4	4	4	4	4	3	3
chr01_42171196	chr01	42171196	candidate_SNP:42171195-42171196	2	3	4	3	3	4	4	4	3	3	4	4	4	3	4	3	3	3	3	4	4	3	3	1	3	3	3	4	3	2	2	3	2	4	3	4	4	3	2	2	4	3	3	3	2	4
chr01_42187993	chr01	42187993	candidate_SNP:42187992-42187993	4	4	4	4	4	4	3	4	4	4	4	4	4	4	4	4	4	4	4	4	4	4	4	4	4	4	4	4	4	4	4	4	4	4	4	4	3	4	4	4	4	4	4	4	4	4
chr01_42349571	chr01	42349571	candidate_SNP:42349570-42349571	4	4	4	3	4	4	4	4	4	4	4	4	4	4	4	3	4	3	4	4	3	4	4	4	4	4	4	4	4	4	4	4	4	3	4	3	4	4	4	4	3	4	4	4	4	4
chr01_42358425	chr01	42358425	solcap_snp_c2_22546	4	3	4	3	4	2	4	2	4	4	4	4	4	4	4	3	4	4	3	2	4	4	4	3	4	2	3	4	3	4	4	3	4	4	2	3	4	4	4	4	4	4	4	4	3	4
chr01_42358430	chr01	42358430	solcap_snp_c2_22545	4	3	2	2	3	4	0	4	4	4	3	4	4	3	4	3	4	2	3	3	2	4	3	4	4	4	4	2	4	3	3	4	4	1	4	3	1	4	4	4	1	4	4	3	4	3
chr01_42360405	chr01	42360405	PotVar0122454	4	3	2	3	4	4	2	4	4	4	3	4	4	3	4	3	4	1	4	4	2	4	3	4	4	4	4	2	4	3	3	4	4	2	4	3	1	4	4	4	2	4	4	3	4	3
chr01_42360839	chr01	42360839	PotVar0122473	3	4	4	4	4	4	4	4	4	4	1	3	2	2	4	3	4	4	3	4	3	2	4	4	4	4	3	4	4	4	4	4	3	4	4	4	4	4	4	4	4	4	4	4	3	4
chr01_42361100	chr01	42361100	PotVar0122478	4	4	4	4	4	4	4	4	4	4	4	4	4	4	4	4	4	4	4	4	4	4	4	4	4	4	4	4	4	4	4	4	4	4	4	4	4	4	4	4	3	4	4	4	4	4
chr01_42363583	chr01	42363583	solcap_snp_c2_22530	4	3	4	3	4	3	4	3	4	3	4	4	4	4	4	3	4	4	3	3	4	4	4	3	4	3	3	4	3	4	4	3	4	4	3	3	4	4	4	4	4	4	4	4	3	4
chr01_42759999	chr01	42759999	candidate_SNP:42759998-42759999	4	4	4	4	3	4	3	4	4	4	4	4	4	4	4	4	4	4	4	3	4	4	4	4	4	4	4	4	4	4	4	4	4	3	4	4	4	4	4	4	4	4	4	4	4	4
chr01_42768573	chr01	42768573	PotVar0037332	4	4	4	4	3	4	4	4	4	4	4	4	4	4	4	4	4	4	3	3	4	4	4	4	4	4	4	4	4	4	4	4	4	3	3	4	4	4	4	4	3	4	4	4	4	3
chr01_43149564	chr01	43149564	candidate_SNP:43149563-43149564	4	4	2	4	4	4	3	4	3	4	4	4	3	3	3	4	4	4	4	3	4	4	3	3	4	4	4	4	4	4	4	3	4	4	3	4	3	4	4	4	4	4	4	2	4	4
chr01_43491628	chr01	43491628	solcap_snp_c2_24678	2	1	0	1	2	3	2	2	3	3	3	4	4	2	3	2	3	0	1	1	2	3	2	0	3	1	1	1	0	2	1	3	2	2	1	2	2	3	2	2	1	2	3	1	1	2
chr01_43575188	chr01	43575188	candidate_SNP:43575187-43575188	4	3	2	1	4	4	4	4	4	4	3	4	4	3	4	4	4	0	4	4	3	4	2	4	4	4	4	2	4	1	2	3	4	2	4	3	1	4	4	4	2	4	4	2	4	3
chr01_43584933	chr01	43584933	solcap_snp_c2_24682	3	2	0	2	0	1	0	1	0	0	4	3	2	4	0	2	0	0	4	1	2	3	0	4	0	2	3	0	2	4	4	1	3	0	2	1	0	0	0	2	0	0	0	0	4	0
chr01_43704451	chr01	43704451	ST4.03ch01_31050108	4	4	2	4	3	4	3	4	4	4	4	4	4	4	4	4	4	4	4	4	4	4	4	4	4	4	4	4	4	4	4	4	4	3	3	4	4	4	4	4	4	4	4	4	4	3
chr01_43734290	chr01	43734290	solcap_snp_c1_15793	2	1	1	1	2	3	1	3	3	3	3	4	4	2	4	1	2	0	1	2	2	3	2	0	3	1	2	2	1	1	1	2	2	1	1	2	1	2	2	2	1	3	3	2	1	2
chr01_43742985	chr01	43742985	solcap_snp_c1_15789	4	4	3	4	3	4	3	4	4	4	4	4	4	4	4	4	4	4	3	3	4	4	4	4	4	4	4	4	4	4	4	4	4	4	3	4	4	4	4	4	4	4	4	4	4	3
chr01_44489586	chr01	44489586	candidate_SNP:44489585-44489586	2	2	4	2	3	3	4	3	3	3	4	4	4	2	4	1	3	3	2	3	4	3	3	0	2	1	2	4	1	2	2	2	2	4	1	3	4	3	2	2	4	3	3	3	1	4
chr01_44581594	chr01	44581594	candidate_SNP:44581593-44581594	4	3	4	3	4	3	4	3	3	3	4	4	4	4	3	3	4	4	4	4	4	4	4	4	3	3	4	3	3	4	4	4	4	3	4	3	4	4	4	4	3	3	3	3	4	4
chr01_44603181	chr01	44603181	candidate_SNP:44603180-44603181	3	3	3	3	3	3	3	3	4	3	3	3	3	3	3	3	2	3	3	3	3	3	3	3	3	3	3	3	4	4	3	4	3	3	3	4	3	4	3	3	3	3	4	4	4	2
chr01_44672176	chr01	44672176	solcap_snp_c2_46231	1	3	4	3	1	3	4	3	2	1	4	3	2	3	2	3	0	2	3	3	3	3	1	1	1	3	2	3	1	2	1	2	1	4	2	3	3	0	0	2	4	1	0	3	2	2
chr01_44725765	chr01	44725765	solcap_snp_c1_11066	4	3	4	3	4	3	4	2	4	4	4	4	4	4	4	3	4	4	3	3	4	4	4	3	4	2	3	4	2	4	4	4	4	4	4	3	4	4	4	4	4	3	4	4	2	4
chr01_44816915	chr01	44816915	ST4.03ch01_32182949	4	4	3	4	4	4	3	4	4	4	4	4	4	4	4	4	4	4	3	4	4	4	4	4	4	4	4	4	4	4	4	4	4	4	3	4	4	4	4	4	4	4	4	4	4	4
chr01_44854398	chr01	44854398	candidate_SNP:44854397-44854398	4	3	2	4	4	4	1	4	4	4	3	4	4	3	4	4	4	3	4	4	3	4	3	4	4	4	4	2	4	3	3	4	4	3	4	4	1	4	4	4	2	4	4	3	4	3
chr01_45112231	chr01	45112231	ST4.03ch01_32488549	4	4	3	4	4	3	3	3	3	4	4	2	4	4	3	4	4	4	4	3	4	4	4	4	4	4	4	4	4	4	4	4	4	4	4	4	4	4	4	3	4	4	4	3	4	4
chr01_45129165	chr01	45129165	solcap_snp_c1_14902	4	3	1	3	3	4	1	4	4	4	3	4	4	3	4	2	4	3	3	3	2	4	3	4	4	4	4	2	4	3	3	4	4	1	3	2	1	4	4	4	1	4	4	3	4	3
chr01_45588428	chr01	45588428	solcap_snp_c2_25760	3	3	2	3	3	3	3	3	3	3	4	2	2	3	3	3	3	3	3	2	3	3	2	3	3	3	3	2	3	3	3	3	4	2	3	2	3	3	4	3	2	3	4	3	3	1
chr01_45588628	chr01	45588628	PotVar0000025	3	3	4	2	3	1	4	3	3	2	4	3	3	4	3	3	3	4	3	3	3	3	3	3	3	3	4	4	4	4	4	2	4	3	3	2	4	4	4	3	4	3	3	4	4	3
chr01_45589178	chr01	45589178	PotVar0000040	4	4	3	4	4	4	4	4	4	4	4	4	4	4	4	4	4	4	4	4	4	4	4	4	4	4	4	4	4	4	3	4	4	3	4	4	4	4	4	4	4	4	4	4	4	3
chr01_45589555	chr01	45589555	PotVar0000060	4	3	1	4	3	4	2	4	4	4	3	4	4	3	4	3	4	3	3	3	3	4	3	4	4	4	4	2	4	3	3	4	4	1	3	3	1	4	4	4	2	4	4	3	4	2
chr01_45593583	chr01	45593583	ST4.03ch01_32957950	2	2	1	2	1	2	1	2	3	2	3	2	2	3	2	1	1	2	2	1	1	3	1	3	3	2	2	1	3	2	2	1	4	1	2	1	0	2	3	2	1	2	2	3	3	0
chr01_45933274	chr01	45933274	ST4.03ch01_33296398	3	2	0	2	2	3	0	3	2	3	3	3	4	2	3	2	3	0	2	3	2	3	2	1	2	3	3	2	2	1	1	3	1	3	2	3	2	2	1	2	2	3	3	1	3	1
chr01_45934536	chr01	45934536	ST4.03ch01_33297660	4	4	3	4	3	4	3	4	4	4	4	4	4	4	4	4	4	4	3	3	4	4	4	4	4	4	4	4	4	4	4	4	4	3	3	4	4	4	4	4	4	4	4	4	4	3
chr01_45934795	chr01	45934795	ST4.03ch01_33297919	4	4	3	4	3	4	3	4	4	4	4	4	4	4	4	4	4	4	3	3	4	4	3	4	4	4	4	4	4	4	4	4	4	3	3	4	4	4	4	4	4	4	4	4	4	3
chr01_46748368	chr01	46748368	solcap_snp_c1_9378	3	3	4	2	2	4	4	4	3	3	4	4	4	3	4	3	3	2	3	4	4	3	2	1	2	3	3	4	2	2	3	3	1	4	4	4	4	2	2	3	4	3	3	4	1	4
chr01_47571951	chr01	47571951	candidate_SNP:47571950-47571951	0	0	0	0	0	0	0	0	0	0	0	0	0	0	0	0	0	0	0	0	0	0	0	0	0	0	0	0	0	0	0	0	0	0	0	0	0	0	0	0	0	0	0	0	0	0
chr01_47576191	chr01	47576191	candidate_SNP:47576190-47576191	2	3	1	3	1	2	3	3	3	2	2	3	2	3	2	3	1	2	4	3	2	3	1	4	3	4	3	1	4	2	2	2	4	2	3	3	0	2	2	3	3	2	2	3	4	0
chr01_47597026	chr01	47597026	candidate_SNP:47597025-47597026	4	4	3	4	3	4	3	4	4	4	4	4	4	4	4	4	4	4	3	4	4	4	4	4	4	4	4	4	4	4	4	4	4	4	3	4	4	4	4	4	4	4	4	4	4	4
chr01_48040059	chr01	48040059	solcap_snp_c2_51027	2	1	4	1	3	2	4	2	1	2	0	2	2	1	3	1	3	1	1	2	2	1	3	0	1	0	1	3	0	2	1	2	0	2	2	2	4	2	2	2	2	2	2	2	0	4
chr01_48041168	chr01	48041168	solcap_snp_c1_14955	2	1	4	1	3	2	4	2	2	2	1	2	2	2	3	1	3	2	1	2	3	1	3	0	1	0	1	3	0	2	2	1	0	2	2	2	4	2	1	2	2	2	1	2	0	4
chr01_48059834	chr01	48059834	ST4.03ch01_35476421	4	1	1	1	2	2	1	1	3	3	3	4	4	3	2	1	4	3	2	2	2	4	2	3	2	1	3	1	2	3	2	3	4	0	2	1	1	4	4	4	0	2	2	2	2	2
chr01_48060995	chr01	48060995	solcap_snp_c1_14956	4	4	2	3	3	4	1	4	4	4	3	4	4	3	4	3	4	1	2	4	3	4	3	4	4	4	4	2	4	3	4	4	4	3	4	4	4	4	4	4	3	4	4	4	4	3
chr01_48277808	chr01	48277808	solcap_snp_c2_46546	2	1	4	0	2	0	3	1	1	2	0	2	2	1	3	1	3	2	0	2	4	1	3	1	0	0	1	2	0	1	2	2	0	1	2	2	3	2	1	2	2	1	2	2	0	4
chr01_48280028	chr01	48280028	ST4.03ch01_35677693	4	3	4	3	2	4	4	4	3	4	4	4	4	3	4	3	4	2	3	4	4	3	2	1	4	3	3	4	3	2	3	3	2	4	4	4	4	3	2	4	4	3	3	3	3	4
chr01_48280367	chr01	48280367	solcap_snp_c2_46540	4	3	1	3	3	4	1	4	4	4	3	4	4	3	4	3	4	2	3	3	2	4	2	4	4	4	4	2	4	3	3	4	4	2	3	3	1	4	4	4	2	4	4	3	4	2
chr01_48445768	chr01	48445768	solcap_snp_c1_13816	4	3	2	3	3	4	1	4	4	4	3	4	4	3	4	3	4	2	3	3	2	4	3	4	4	4	4	2	4	3	3	4	4	2	3	3	1	4	4	4	2	4	4	3	4	2
chr01_48474617	chr01	48474617	ST4.03ch01_35858625	4	4	2	4	4	4	4	4	4	4	4	4	4	3	4	4	4	4	4	4	4	4	4	4	4	4	4	2	4	3	3	4	4	4	4	4	2	4	4	4	4	4	4	3	4	4
chr01_48487984	chr01	48487984	candidate_SNP:48487983-48487984	4	3	3	4	4	4	3	4	4	4	3	4	4	3	4	4	4	3	4	4	4	4	3	4	4	4	4	2	4	3	3	4	4	4	4	4	2	4	4	4	3	4	4	3	4	3
chr01_48490970	chr01	48490970	solcap_snp_c1_13825	2	4	4	4	2	3	4	3	3	2	4	3	3	4	2	4	0	4	4	3	3	3	2	4	3	4	3	3	4	3	3	2	4	4	2	3	3	2	2	3	4	2	3	4	4	2
chr01_48498501	chr01	48498501	solcap_snp_c1_13822	3	2	1	3	2	4	1	4	3	3	3	4	4	2	4	2	4	0	2	3	2	3	2	1	2	3	2	2	3	1	1	3	2	2	3	3	1	3	3	3	2	3	3	2	3	1
chr01_48628702	chr01	48628702	candidate_SNP:48628701-48628702	4	4	3	4	3	4	3	4	4	4	4	4	4	4	4	4	4	4	3	3	4	4	4	4	4	4	4	4	4	4	4	4	4	3	2	4	4	4	4	4	4	4	4	4	4	3
chr01_49047097	chr01	49047097	solcap_snp_c1_3693	4	3	2	3	3	4	1	4	4	4	3	4	4	3	4	3	4	2	3	3	2	4	3	4	4	4	4	2	4	3	3	4	4	2	3	3	1	4	4	4	2	4	4	3	4	2
chr01_49047838	chr01	49047838	candidate_SNP:49047837-49047838	4	4	4	4	4	4	4	4	4	4	4	4	4	4	4	4	4	4	3	4	4	4	4	4	4	4	4	4	4	4	4	4	4	3	3	4	4	4	4	4	4	4	4	4	4	4
chr01_49674279	chr01	49674279	solcap_snp_c2_27680	4	3	1	4	2	4	3	4	4	4	4	4	4	2	4	3	4	3	2	3	3	4	4	4	4	4	4	3	4	3	3	4	4	3	3	3	2	4	4	4	2	4	4	3	4	3
chr01_49882151	chr01	49882151	solcap_snp_c1_8542	4	4	3	4	4	4	3	4	4	4	4	4	4	4	4	4	4	4	3	3	4	4	4	4	4	4	4	4	4	4	4	4	4	3	3	4	4	4	4	4	4	4	4	4	4	3
chr01_49882190	chr01	49882190	solcap_snp_c1_8541	4	2	1	4	4	4	2	4	4	4	3	4	4	3	4	3	4	3	3	3	2	4	3	4	4	4	4	2	4	3	3	4	4	3	3	3	2	4	4	4	2	4	4	3	4	2
chr01_50145474	chr01	50145474	PotVar0000210	4	4	4	4	4	4	3	4	4	4	4	4	4	4	4	4	4	4	4	4	4	4	4	4	4	4	4	4	4	4	4	4	4	4	4	4	3	4	4	4	4	4	4	4	4	4
chr01_50162396	chr01	50162396	candidate_SNP:50162395-50162396	1	3	4	4	1	3	4	3	2	2	4	2	1	3	2	4	2	3	2	3	3	3	1	2	1	3	2	2	2	1	1	1	3	4	3	3	2	1	2	1	4	2	2	3	2	2
chr01_50165595	chr01	50165595	candidate_SNP:50165594-50165595	4	4	3	4	3	4	3	4	4	4	4	4	4	4	4	4	4	4	3	3	4	4	4	4	4	4	4	4	4	4	4	4	4	3	3	4	4	4	4	4	4	4	4	4	4	3
chr01_50190193	chr01	50190193	ST4.03ch01_37569173	4	4	3	4	3	4	3	4	4	4	4	4	4	4	4	4	4	4	3	3	4	4	4	4	4	4	4	4	4	4	4	4	4	3	4	4	4	4	4	4	4	4	4	4	4	3
chr01_50190820	chr01	50190820	ST4.03ch01_37569800	4	3	2	3	3	4	3	4	4	4	3	4	4	3	4	3	4	2	3	3	2	4	3	4	4	4	4	3	4	3	3	4	4	2	3	3	2	4	4	4	2	4	4	3	4	2
chr01_50231351	chr01	50231351	candidate_SNP:50231350-50231351	4	4	4	4	4	4	3	4	4	4	4	4	4	4	4	4	4	4	4	4	4	4	4	4	4	4	4	4	4	4	4	4	4	4	4	4	3	4	4	4	4	4	4	4	4	4
chr01_50307990	chr01	50307990	candidate_SNP:50307989-50307990	4	4	4	4	4	4	3	4	4	4	4	4	4	4	4	4	4	4	4	4	4	4	4	4	4	4	4	4	4	4	4	4	4	4	4	4	3	4	4	4	4	4	4	4	4	4
chr01_51101131	chr01	51101131	solcap_snp_c2_42829	4	4	3	4	3	4	3	4	4	4	4	4	4	4	4	4	4	4	3	3	4	4	4	4	4	4	4	4	4	4	4	4	4	3	3	4	4	4	4	4	4	4	4	4	4	3
chr01_51442400	chr01	51442400	candidate_SNP:51442399-51442400	2	1	3	1	2	1	3	1	2	0	1	2	2	1	2	1	2	2	1	3	3	1	3	0	1	0	1	3	0	1	1	2	0	1	2	2	3	1	1	3	2	2	2	1	0	2
chr01_51532951	chr01	51532951	solcap_snp_c2_14939	4	3	0	3	3	4	2	4	4	4	3	3	4	3	4	2	4	2	3	3	2	4	3	4	4	4	4	1	4	2	2	4	4	2	2	3	2	4	4	3	2	4	4	2	4	2
chr01_51543199	chr01	51543199	candidate_SNP:51543198-51543199	4	4	4	4	4	4	4	4	4	4	4	4	4	4	4	4	4	4	4	4	4	4	4	4	4	4	4	4	4	4	4	4	4	4	4	4	4	4	4	4	4	4	4	4	4	4
chr01_51572796	chr01	51572796	candidate_SNP:51572795-51572796	4	4	3	4	4	4	3	4	4	4	4	4	4	3	4	4	4	4	4	4	4	4	4	4	4	4	4	4	4	3	4	4	4	4	4	4	3	4	4	4	4	4	4	4	4	3
chr01_52221191	chr01	52221191	PotVar0071533	4	4	3	4	4	4	4	4	4	4	3	4	4	4	4	4	4	4	4	4	4	4	3	4	4	4	4	3	4	4	4	4	4	4	4	4	3	4	4	4	4	4	4	3	4	4
chr01_52241578	chr01	52241578	candidate_SNP:52241577-52241578	4	4	4	4	4	4	4	4	4	4	4	4	4	4	4	4	4	4	4	4	4	4	4	4	4	4	4	4	4	4	4	4	4	4	4	4	4	4	4	4	4	4	4	4	4	4
chr01_52942441	chr01	52942441	solcap_snp_c1_15855	4	4	3	4	3	4	3	4	4	4	4	4	4	4	4	4	4	4	3	3	4	4	4	4	4	4	4	4	4	4	4	4	4	3	3	4	4	4	4	4	4	4	4	4	4	3
chr01_52945656	chr01	52945656	solcap_snp_c1_15851	4	4	3	4	3	4	3	4	4	4	4	4	4	4	4	4	4	4	3	3	4	4	4	4	4	4	4	4	4	4	4	4	4	3	3	4	4	4	4	4	4	4	4	4	4	3
chr01_52949911	chr01	52949911	solcap_snp_c1_15853	4	4	3	4	3	4	4	4	4	4	4	4	4	4	4	4	4	4	3	3	4	4	4	4	4	4	4	4	4	4	4	4	4	3	3	4	4	4	4	4	4	4	4	4	4	3
chr01_52993259	chr01	52993259	PotVar0132309	4	4	3	4	3	4	3	4	4	4	4	4	4	4	4	4	4	4	3	3	4	4	4	4	4	4	4	4	4	4	4	4	4	3	3	4	4	4	4	4	4	4	4	4	4	3
chr01_52994396	chr01	52994396	PotVar0132293	4	3	4	4	4	4	4	4	4	4	4	4	4	4	4	4	4	3	4	4	4	4	4	4	4	4	4	4	4	4	4	4	4	4	4	4	4	4	4	4	3	4	4	4	4	4
chr01_52994493	chr01	52994493	PotVar0132289	4	4	3	4	3	4	3	4	4	4	4	4	4	4	4	4	4	4	3	3	4	4	4	4	4	4	4	4	4	4	4	4	4	3	3	4	4	4	4	4	4	4	4	4	4	3
chr01_52994623	chr01	52994623	PotVar0132283	4	4	3	4	4	4	3	4	4	4	4	4	4	4	4	4	4	4	3	2	4	4	4	4	4	4	4	4	4	4	4	4	4	3	3	4	4	4	4	4	4	4	4	4	4	3
chr01_52996111	chr01	52996111	PotVar0132276	3	3	4	4	3	4	4	4	3	3	4	3	4	3	4	4	4	3	4	4	4	3	3	2	3	3	2	4	2	3	2	3	2	4	4	4	4	3	3	4	4	3	3	3	2	4
chr01_52996497	chr01	52996497	PotVar0132265	2	3	3	2	2	2	2	2	2	3	2	2	2	3	2	2	2	3	2	2	3	2	3	2	3	3	2	3	3	3	3	2	2	4	3	3	2	2	2	2	3	2	3	3	3	3
chr01_52996601	chr01	52996601	solcap_snp_c2_54811	2	2	3	2	2	2	2	2	2	2	2	2	2	2	2	2	2	2	3	2	2	2	2	2	2	2	2	3	2	3	2	2	2	4	2	3	2	2	2	2	4	2	2	2	2	2
chr01_53413573	chr01	53413573	candidate_SNP:53413572-53413573	4	3	3	4	4	4	4	4	4	4	3	4	3	4	4	4	4	3	3	4	4	4	3	4	4	4	4	3	4	3	3	4	4	4	4	4	3	4	4	3	3	4	4	3	3	3
chr01_53418785	chr01	53418785	solcap_snp_c1_11872	3	4	3	2	3	4	3	4	4	4	1	2	1	1	3	2	4	2	2	3	0	2	4	1	4	4	3	4	4	4	4	4	3	4	2	3	4	4	4	3	4	4	4	1	3	2
chr01_53436612	chr01	53436612	PotVar0095187	4	3	4	4	4	4	4	4	4	4	4	4	4	4	4	4	4	3	4	4	4	4	4	4	4	4	4	4	4	3	4	4	4	4	4	4	4	4	4	4	4	4	4	4	4	4
chr01_53436948	chr01	53436948	PotVar0095184	2	4	4	3	4	4	4	4	4	4	1	3	2	3	4	3	3	3	2	4	2	2	4	3	3	4	3	4	4	4	4	4	2	4	3	4	4	3	2	4	4	4	4	4	3	4
chr01_53438215	chr01	53438215	PotVar0095169	3	3	1	2	3	4	3	4	4	4	0	2	3	1	4	1	3	1	1	3	1	2	3	3	3	4	2	2	4	2	2	4	3	2	2	3	1	3	4	2	2	4	4	4	3	1
chr01_53440650	chr01	53440650	candidate_SNP:53440649-53440650	4	4	4	4	4	4	4	4	4	4	4	4	4	4	3	4	4	4	4	4	4	4	4	4	4	4	4	4	4	4	4	4	4	4	4	4	4	4	4	4	4	4	4	4	4	4
chr01_53444045	chr01	53444045	solcap_snp_c2_40131	2	2	0	2	2	4	1	4	2	3	0	2	2	0	3	3	2	0	1	3	2	1	2	1	2	3	2	2	2	1	1	3	0	2	2	3	1	2	1	2	2	3	3	1	1	3
chr01_53445295	chr01	53445295	solcap_snp_c2_40133	4	4	3	4	4	4	3	4	4	4	4	4	4	4	4	4	4	4	4	4	4	4	4	4	4	4	4	4	4	4	4	4	4	3	3	4	4	4	4	4	4	4	4	4	4	4
chr01_53446252	chr01	53446252	solcap_snp_c2_40134	2	4	4	4	2	4	4	4	3	4	4	3	1	4	2	4	2	4	4	2	3	3	3	4	3	4	3	3	4	3	3	3	3	4	3	2	3	3	3	2	4	1	2	4	4	4
chr01_53779194	chr01	53779194	candidate_SNP:53779193-53779194	4	4	4	3	4	3	4	4	4	4	4	4	4	4	4	3	4	4	4	4	4	4	4	4	4	4	4	4	4	4	4	4	4	4	4	4	4	4	4	3	4	4	4	4	3	NA
chr01_53956795	chr01	53956795	candidate_SNP:53956794-53956795	4	3	4	4	4	4	4	4	4	4	4	4	4	4	4	4	4	3	4	4	4	4	4	4	4	4	4	4	4	4	4	4	4	4	4	4	4	4	4	4	4	4	4	4	4	4
chr01_53968796	chr01	53968796	candidate_SNP:53968795-53968796	4	4	3	4	3	3	4	2	4	3	4	4	4	4	4	4	3	4	4	4	4	4	4	4	4	4	4	4	4	4	4	3	4	4	4	4	4	3	4	4	4	4	4	4	4	3
chr01_53983155	chr01	53983155	ST4.03ch01_45197679	4	1	2	2	3	2	3	4	3	4	0	3	2	0	3	2	2	0	1	2	0	3	2	2	3	1	3	1	3	1	2	3	2	2	1	3	2	3	3	3	2	4	3	2	1	3
chr01_53987189	chr01	53987189	candidate_SNP:53987188-53987189	4	4	2	4	4	4	3	4	4	4	4	4	4	3	4	4	4	4	4	4	4	4	4	4	4	4	4	4	4	3	3	4	4	4	4	4	3	4	4	4	4	4	4	4	4	2
chr01_54049174	chr01	54049174	candidate_SNP:54049173-54049174	4	4	3	3	3	4	3	4	4	4	4	4	4	4	3	3	3	3	3	1	4	4	4	4	4	4	4	4	4	4	4	4	4	2	3	3	4	3	4	4	3	3	3	4	4	3
chr01_54270396	chr01	54270396	candidate_SNP:54270395-54270396	4	2	1	2	2	2	1	2	2	1	3	4	3	2	1	2	1	2	4	2	3	4	4	4	3	3	4	1	3	2	3	4	4	0	3	3	3	2	4	4	0	2	2	1	4	0
chr01_54306954	chr01	54306954	solcap_snp_c2_48161	4	4	3	4	3	4	2	4	3	4	4	4	4	4	3	4	3	4	3	2	4	4	4	4	4	4	4	4	4	4	4	4	4	3	3	4	4	3	4	4	4	3	3	4	4	2
chr01_54346342	chr01	54346342	candidate_SNP:54346341-54346342	4	4	3	4	4	4	3	4	3	4	4	4	4	3	4	4	4	4	4	4	4	4	4	4	4	4	4	4	4	3	3	4	4	4	4	4	3	4	4	4	4	4	4	4	4	4
chr01_54354238	chr01	54354238	PotVar0081102	4	4	4	4	4	4	4	4	4	4	4	4	4	3	4	4	4	4	3	4	4	4	3	4	4	4	4	3	4	4	4	4	4	4	4	4	3	4	4	4	4	4	4	4	4	4
chr01_54434652	chr01	54434652	solcap_snp_c1_14259	4	4	3	4	3	4	3	4	3	4	4	4	4	4	3	4	3	4	3	2	4	4	4	4	4	4	4	4	4	4	4	4	4	3	3	4	4	3	4	4	4	3	3	4	4	3
chr01_54435061	chr01	54435061	solcap_snp_c2_48166	3	2	0	2	1	2	1	1	1	1	2	2	3	3	0	3	2	2	2	2	0	3	1	4	1	3	3	0	3	1	1	2	4	0	2	2	2	2	3	1	0	1	1	1	3	0
chr01_54437579	chr01	54437579	candidate_SNP:54437578-54437579	4	3	3	4	4	4	3	4	4	4	3	4	4	3	4	4	4	3	4	4	4	4	3	4	4	4	4	3	4	4	3	4	4	4	4	4	2	4	4	4	3	4	4	4	4	1
chr01_54439010	chr01	54439010	solcap_snp_c1_14249	0	4	0	3	0	2	0	1	0	0	2	0	0	2	0	2	1	0	1	1	0	1	0	2	1	2	2	0	0	0	0	0	0	0	2	2	0	2	2	0	0	0	0	0	1	0
chr01_54439022	chr01	54439022	solcap_snp_c1_14248	4	4	2	3	4	4	4	4	4	4	3	4	4	2	4	4	4	2	4	4	2	4	2	4	4	4	4	3	4	4	3	4	1	3	4	3	2	4	4	4	3	4	4	4	4	2
chr01_54439355	chr01	54439355	solcap_snp_c2_48162	0	2	0	2	0	1	0	1	0	0	2	1	1	1	0	2	1	2	1	1	0	1	0	2	1	2	2	0	1	0	0	1	2	0	1	1	0	1	2	0	0	0	0	0	1	0
chr01_54439990	chr01	54439990	candidate_SNP:54439989-54439990	4	4	3	4	3	4	3	4	3	4	4	4	4	4	2	4	3	4	2	2	4	4	4	4	4	4	4	4	4	4	4	4	4	3	3	4	4	3	4	4	4	3	3	4	4	3
chr01_54702386	chr01	54702386	candidate_SNP:54702385-54702386	3	3	2	3	2	3	1	3	3	1	2	3	4	3	3	4	1	1	3	3	1	3	1	4	2	4	3	1	4	2	1	2	4	3	2	2	0	1	3	4	1	3	2	4	4	0
chr01_54738399	chr01	54738399	candidate_SNP:54738398-54738399	4	3	4	3	4	4	4	4	4	4	3	4	4	4	4	3	4	3	4	4	3	4	4	4	4	4	4	4	4	4	4	4	4	3	4	3	3	4	4	3	3	4	4	4	4	4
chr01_54739195	chr01	54739195	candidate_SNP:54739194-54739195	1	2	0	3	1	2	1	1	0	0	2	1	2	1	2	2	2	2	2	3	1	3	2	1	3	2	3	0	2	2	1	3	2	0	4	3	1	3	4	1	0	2	4	0	1	0
chr01_54752721	chr01	54752721	solcap_snp_c1_14563	3	4	4	4	4	4	3	4	4	4	4	4	3	4	3	4	3	4	4	4	3	3	3	4	2	4	3	3	4	4	4	4	4	4	3	3	3	3	3	3	4	3	3	4	4	4
chr01_55227584	chr01	55227584	solcap_snp_c1_16169	2	2	2	3	3	2	0	3	2	3	4	3	3	2	3	4	4	1	2	3	2	2	2	3	4	3	3	1	3	3	3	2	3	2	3	2	2	4	4	2	1	2	2	3	1	2
chr01_55239603	chr01	55239603	ST4.03ch01_44206147	4	4	3	4	4	4	4	4	4	4	4	4	4	4	4	4	4	4	3	4	3	3	4	4	4	4	3	3	4	3	2	4	4	4	4	3	4	4	4	3	4	4	3	3	3	4
chr01_55642025	chr01	55642025	solcap_snp_c2_45621	4	4	4	4	4	4	3	4	4	4	4	4	4	4	4	4	4	4	4	4	4	4	4	4	4	4	4	4	4	3	3	4	4	4	4	4	3	4	4	4	4	4	4	4	4	4
chr01_55642075	chr01	55642075	solcap_snp_c2_45622	2	4	4	4	4	4	4	4	4	4	4	4	4	4	4	4	4	4	4	4	4	3	1	4	3	4	4	3	4	4	4	4	4	4	3	4	4	2	3	3	4	3	3	4	4	4
chr01_55643970	chr01	55643970	candidate_SNP:55643969-55643970	4	4	4	4	4	4	4	4	4	4	4	4	4	4	4	4	4	4	4	4	4	4	3	4	4	4	4	3	4	4	4	4	4	4	4	4	2	4	4	4	4	4	4	4	4	4
chr01_55646769	chr01	55646769	solcap_snp_c2_45625	4	4	3	3	2	4	3	4	3	4	4	4	4	4	3	3	3	3	3	2	3	4	3	4	4	4	4	3	4	4	4	4	4	3	3	3	3	3	4	4	3	2	3	4	4	3
chr01_55649688	chr01	55649688	candidate_SNP:55649687-55649688	4	4	2	4	3	3	3	3	2	3	4	2	4	2	3	4	4	2	4	3	2	4	3	4	4	3	4	4	3	4	4	3	4	3	4	4	4	4	4	2	4	3	2	2	2	4
chr01_55772778	chr01	55772778	candidate_SNP:55772777-55772778	4	4	3	4	4	4	3	4	4	4	4	4	4	3	4	4	4	4	4	4	4	4	4	4	4	4	4	4	4	3	3	4	4	4	4	4	3	4	4	4	4	4	4	4	4	3
chr01_55773879	chr01	55773879	solcap_snp_c2_45631	4	4	3	4	3	4	3	4	3	4	4	4	4	4	3	4	3	4	3	3	3	4	4	4	4	4	4	4	4	4	4	4	4	2	3	4	4	3	4	4	4	4	3	4	4	3
chr01_55811663	chr01	55811663	solcap_snp_c2_57284	1	3	0	3	3	3	1	2	2	3	2	1	1	1	1	2	3	1	1	1	1	1	0	3	2	3	2	1	2	0	0	2	3	2	1	2	1	2	3	0	1	1	1	1	1	2
chr01_55814699	chr01	55814699	solcap_snp_c2_57290	4	4	3	4	3	3	2	3	1	4	3	2	4	4	3	4	3	4	2	1	4	4	3	4	3	4	4	3	4	4	4	4	4	3	3	4	3	3	4	3	3	2	2	3	2	3
chr01_55816248	chr01	55816248	solcap_snp_c1_16515	3	4	4	4	4	4	4	4	4	4	3	4	3	4	3	4	3	4	4	4	4	3	2	4	3	4	4	3	4	4	4	4	4	4	3	4	4	3	3	3	4	3	3	4	4	4
chr01_55869343	chr01	55869343	solcap_snp_c2_56359	3	4	4	4	4	4	4	4	4	4	3	3	3	4	3	4	3	4	4	4	4	3	2	4	2	4	3	2	4	3	3	4	3	4	2	4	3	3	3	3	4	3	3	4	4	4
chr01_55873054	chr01	55873054	solcap_snp_c1_16334	1	4	4	4	4	4	4	4	4	4	2	3	2	4	3	4	3	4	4	4	4	3	2	4	2	4	3	3	4	3	3	4	3	4	3	4	3	3	3	3	4	3	3	4	4	3
chr01_55874486	chr01	55874486	solcap_snp_c2_56356	4	4	4	4	4	4	4	4	4	4	4	4	3	4	2	4	3	4	4	4	4	3	3	4	3	4	4	4	4	4	4	4	4	4	3	4	4	3	4	3	4	3	2	4	4	4
chr01_56169578	chr01	56169578	candidate_SNP:56169577-56169578	4	4	4	3	4	4	2	4	4	4	3	4	4	4	4	3	4	3	4	3	3	4	4	4	4	4	4	4	4	4	4	4	4	4	4	4	3	4	4	3	3	4	3	4	4	4
chr01_56171068	chr01	56171068	ST4.03ch01_11431225	4	4	4	3	4	4	4	4	4	4	4	4	4	4	4	4	4	4	4	4	4	4	4	4	4	4	4	4	4	4	4	4	4	3	4	3	4	4	4	4	3	4	4	4	4	4
chr01_56177513	chr01	56177513	solcap_snp_c2_43645	4	4	0	2	2	3	2	3	1	4	3	3	3	3	4	3	4	3	3	1	1	4	4	4	4	4	4	4	4	0	0	4	4	2	3	2	3	4	4	3	2	1	4	3	4	3
chr01_56205425	chr01	56205425	solcap_snp_c1_12859	2	2	0	4	2	2	1	3	2	4	2	2	2	2	3	3	4	2	1	1	1	2	3	4	4	4	2	3	4	0	0	4	3	1	1	2	1	4	4	1	1	2	2	0	1	2
chr01_56205815	chr01	56205815	solcap_snp_c1_12858	4	4	2	3	3	3	1	3	2	4	3	3	4	3	4	3	4	3	3	2	3	4	2	4	4	4	4	3	4	3	3	4	4	2	2	3	3	4	4	3	2	3	3	2	3	2
chr01_56213037	chr01	56213037	solcap_snp_c2_43644	2	4	3	4	3	4	3	4	4	4	4	3	3	4	4	4	4	4	3	2	4	4	4	4	4	4	3	4	4	3	3	4	3	3	3	4	2	4	4	4	4	4	4	4	4	3
chr01_56323979	chr01	56323979	candidate_SNP:56323978-56323979	4	4	4	4	4	3	3	2	2	4	2	2	4	4	4	4	4	4	4	3	4	4	3	4	4	4	4	3	4	4	4	4	4	4	4	4	3	4	4	3	3	2	3	3	3	4
chr01_56325574	chr01	56325574	candidate_SNP:56325573-56325574	4	4	4	4	3	4	4	4	4	4	4	4	4	3	4	4	4	3	4	4	4	4	3	3	4	3	4	4	3	4	4	3	4	4	4	4	4	4	4	4	4	4	4	4	4	4
chr01_57015817	chr01	57015817	ST4.03ch01_10571928	4	4	3	4	3	4	3	4	4	4	4	4	4	4	4	4	4	4	4	2	4	4	4	4	4	4	4	4	4	4	4	4	4	3	3	4	4	4	4	4	4	4	4	4	4	3
chr01_57028670	chr01	57028670	PotVar0071625	4	4	3	4	3	4	3	4	4	4	4	4	4	4	4	4	4	4	3	2	4	4	4	4	4	4	4	4	4	4	4	4	4	3	3	4	4	4	4	4	4	4	4	4	4	3
chr01_57032658	chr01	57032658	PotVar0071575	4	4	4	4	4	4	4	4	4	4	4	4	4	4	4	4	4	4	4	4	4	4	3	4	4	4	4	3	4	4	4	4	4	4	4	4	3	4	4	4	4	4	4	4	4	4
chr01_57787460	chr01	57787460	ST4.03ch01_9789585	3	4	4	4	4	4	4	4	4	4	4	3	3	4	4	4	4	4	4	4	4	4	4	4	4	4	3	4	4	4	4	4	3	4	4	3	3	4	4	4	4	4	4	4	4	4
chr01_58478373	chr01	58478373	candidate_SNP:58478372-58478373	3	4	3	3	4	3	4	3	0	NA	2	4	3	4	3	3	4	3	4	4	3	4	4	4	4	4	4	4	4	NA	NA	4	4	0	4	3	NA	4	4	4	1	2	2	2	2	2
chr01_58521473	chr01	58521473	candidate_SNP:58521472-58521473	4	4	3	3	4	3	2	2	1	4	3	3	4	3	4	3	4	3	4	3	2	4	3	4	4	4	4	2	4	2	2	4	4	3	4	3	2	4	4	2	2	2	2	3	2	3
chr01_58626371	chr01	58626371	candidate_SNP:58626370-58626371	4	4	3	4	3	4	3	4	4	4	4	4	4	4	4	4	4	4	4	2	4	4	4	4	4	4	4	4	4	4	4	4	4	3	3	4	4	4	4	4	4	4	4	4	4	3
chr01_58629576	chr01	58629576	candidate_SNP:58629575-58629576	4	4	4	4	4	4	4	4	4	4	4	4	4	4	4	4	4	4	4	4	4	4	4	4	4	4	4	4	4	4	4	4	4	4	4	4	4	4	4	4	4	4	4	4	4	4
chr01_58637025	chr01	58637025	solcap_snp_c1_14219	3	2	3	2	3	2	3	2	2	2	3	4	3	3	3	3	3	2	3	4	2	3	4	3	3	3	4	2	3	4	4	3	4	2	4	3	3	2	4	4	2	3	2	2	2	2
chr01_58675960	chr01	58675960	candidate_SNP:58675959-58675960	3	4	4	4	4	4	4	4	4	4	4	3	3	4	4	4	4	4	4	4	4	4	4	4	4	4	2	4	4	3	3	4	3	4	4	3	3	4	4	4	4	4	4	4	4	4
chr01_58676145	chr01	58676145	candidate_SNP:58676144-58676145	4	4	3	4	3	4	2	4	4	4	4	4	4	4	4	4	4	4	4	2	4	4	4	4	4	4	4	4	4	4	4	4	4	3	3	4	4	4	4	4	4	4	4	4	4	3
chr01_58782972	chr01	58782972	ST4.03ch01_57183823	3	2	4	2	3	3	4	3	4	4	2	2	2	3	3	2	3	3	3	3	3	2	3	2	3	2	3	3	3	4	4	2	1	4	2	3	4	3	1	3	4	4	4	4	3	4
chr01_58799988	chr01	58799988	candidate_SNP:58799987-58799988	3	4	3	3	4	4	4	4	3	4	2	4	4	4	2	2	2	3	3	4	3	3	3	4	2	4	4	2	4	2	2	4	4	3	3	3	4	2	3	2	2	2	1	3	4	4
chr01_58883191	chr01	58883191	PotVar0018983	4	4	3	4	3	4	3	4	4	4	4	4	4	4	4	4	4	4	4	3	4	4	4	4	4	4	4	4	4	4	4	4	4	3	3	4	4	4	4	4	4	4	4	4	4	3
chr01_58883454	chr01	58883454	PotVar0018968	4	4	4	4	4	4	2	2	2	4	4	3	4	4	4	4	4	4	4	3	4	4	2	4	4	4	4	3	4	4	4	4	4	4	4	4	3	4	4	3	4	3	2	3	1	4
chr01_58930982	chr01	58930982	solcap_snp_c2_45672	4	4	3	4	3	4	3	4	4	4	4	4	4	4	4	4	4	4	4	3	4	4	4	4	4	4	4	4	4	4	4	4	4	3	3	4	4	4	4	4	4	4	4	4	4	3
chr01_58966007	chr01	58966007	candidate_SNP:58966006-58966007	4	4	2	4	4	4	3	4	4	4	4	4	4	3	4	4	4	4	4	4	4	4	4	4	4	4	4	4	4	3	3	4	4	4	4	4	3	4	4	4	4	4	4	4	4	3
chr01_58967659	chr01	58967659	solcap_snp_c1_13575	4	4	2	3	3	3	1	3	2	4	3	3	4	3	4	3	4	2	4	1	2	4	4	4	4	4	4	3	4	3	3	4	4	2	3	3	2	4	4	3	2	3	3	3	2	2
chr01_58973578	chr01	58973578	candidate_SNP:58973577-58973578	4	4	3	4	4	4	3	4	4	4	3	4	4	3	4	4	4	4	4	4	3	4	3	4	4	4	4	3	4	3	3	4	4	4	4	4	2	4	4	4	3	4	4	4	4	4
chr01_59035187	chr01	59035187	candidate_SNP:59035186-59035187	4	4	3	4	4	4	3	4	4	4	4	4	4	4	4	4	4	4	4	3	4	4	4	4	4	4	4	4	4	4	4	4	4	3	3	4	4	4	4	4	4	4	4	4	4	3
chr01_59136353	chr01	59136353	PotVar0018933	3	2	1	2	3	1	1	1	3	1	1	3	3	1	3	1	4	2	3	2	3	3	3	2	2	3	4	4	3	3	2	4	4	1	3	2	1	3	4	4	1	1	1	1	2	2
chr01_59138436	chr01	59138436	PotVar0018915	4	4	4	3	4	4	4	4	4	4	4	4	4	4	4	4	4	2	4	4	3	4	4	4	4	4	4	4	4	4	4	4	4	3	4	3	4	4	4	4	3	4	4	4	4	4
chr01_59327983	chr01	59327983	candidate_SNP:59327982-59327983	4	4	3	4	3	4	3	4	4	4	4	4	4	4	4	4	4	4	4	2	4	4	4	4	4	4	4	4	4	4	4	4	4	3	3	4	4	4	4	4	4	4	4	4	4	3
chr01_59347966	chr01	59347966	candidate_SNP:59347965-59347966	4	4	4	4	4	3	3	3	2	4	3	3	4	4	4	4	4	4	4	3	4	4	3	4	4	4	4	3	4	4	4	4	4	4	4	4	3	4	4	3	3	3	3	3	3	4
chr01_59359190	chr01	59359190	candidate_SNP:59359189-59359190	3	4	3	3	2	4	2	4	4	3	3	2	3	1	4	2	4	2	3	4	2	3	3	3	4	4	3	4	3	2	3	2	3	3	4	4	1	4	4	3	4	4	4	3	3	4
chr01_59367093	chr01	59367093	solcap_snp_c2_43285	2	0	0	0	0	0	0	0	1	0	1	0	0	0	1	0	2	0	1	0	0	1	1	0	1	0	0	1	0	3	1	0	0	0	2	0	0	2	1	1	0	1	1	0	0	0
chr01_59367548	chr01	59367548	solcap_snp_c2_43288	2	1	3	2	4	2	3	3	2	2	1	1	2	3	2	3	3	3	2	3	2	1	4	2	3	1	3	3	2	3	3	2	2	4	2	3	3	4	1	4	4	4	4	3	2	4
chr01_59367991	chr01	59367991	candidate_SNP:59367990-59367991	4	4	4	4	4	3	2	3	2	4	4	3	4	4	4	4	4	4	4	3	4	4	4	4	4	4	4	4	4	4	4	4	4	4	4	4	4	4	4	3	4	3	3	3	2	4
chr01_59369202	chr01	59369202	candidate_SNP:59369201-59369202	2	1	3	2	3	3	3	3	3	3	2	1	0	3	3	2	4	2	1	3	2	1	2	3	4	2	0	2	3	3	2	2	2	4	3	2	0	4	4	2	3	4	4	3	2	4
chr01_59405696	chr01	59405696	ST4.03ch01_57804696	4	2	4	3	3	3	4	3	3	3	4	3	2	4	3	3	4	4	3	3	3	2	3	4	4	2	4	3	3	3	3	1	4	4	3	3	4	4	4	4	4	4	4	4	3	4
chr01_59463670	chr01	59463670	solcap_snp_c2_56416	4	2	3	2	3	2	1	3	1	3	4	3	2	3	3	3	4	4	3	2	2	3	4	2	4	2	4	3	4	4	3	2	4	3	3	1	3	4	4	3	3	2	3	4	3	3
chr01_59476799	chr01	59476799	candidate_SNP:59476798-59476799	4	4	4	4	4	3	3	3	3	4	4	3	4	4	4	4	4	4	4	2	4	4	3	4	4	4	4	4	4	4	4	4	4	4	4	4	4	4	4	3	4	3	3	3	3	4
chr01_59522361	chr01	59522361	candidate_SNP:59522360-59522361	3	2	2	1	1	1	1	1	1	2	3	2	2	2	1	1	4	2	3	0	1	2	1	1	2	0	1	1	0	2	2	1	2	2	3	0	1	4	4	2	1	2	2	3	1	2
chr01_59531084	chr01	59531084	solcap_snp_c1_14633	4	2	4	3	2	3	3	2	3	3	4	4	3	3	3	3	4	4	3	3	3	2	2	3	4	2	4	3	3	4	4	1	4	4	3	3	4	4	4	4	4	4	4	4	3	4
chr01_59534397	chr01	59534397	candidate_SNP:59534396-59534397	3	4	4	4	4	4	4	4	4	4	4	4	3	4	4	4	4	4	4	4	4	4	4	4	4	4	1	4	4	4	4	4	3	4	4	3	2	4	4	4	4	4	4	4	4	4
chr01_59627929	chr01	59627929	candidate_SNP:59627928-59627929	4	4	3	4	3	4	4	4	4	4	4	4	4	4	4	4	4	4	4	2	4	4	4	4	4	4	4	4	4	4	4	4	4	3	3	4	4	4	4	4	4	4	4	4	4	3
chr01_59670526	chr01	59670526	solcap_snp_c2_49619	2	4	2	4	3	3	3	3	3	1	3	4	3	3	1	4	1	4	2	4	2	3	2	4	2	4	1	3	4	1	1	4	1	3	2	3	1	1	1	2	2	3	3	4	4	1
chr01_59691964	chr01	59691964	candidate_SNP:59691963-59691964	4	2	4	3	1	3	3	2	2	3	4	4	2	3	3	3	4	4	3	0	3	2	2	3	4	2	4	3	2	4	4	1	4	4	3	3	4	4	4	4	4	4	4	4	1	4
chr01_59793887	chr01	59793887	solcap_snp_c2_2723	4	4	3	4	4	4	3	4	4	4	3	4	4	4	4	4	4	4	4	3	3	4	3	4	4	4	4	3	4	4	3	4	4	4	4	4	2	4	4	4	3	4	3	4	4	3
chr01_59840795	chr01	59840795	candidate_SNP:59840794-59840795	1	0	4	0	1	1	1	1	0	2	2	2	1	1	0	1	0	2	0	0	1	1	0	1	1	0	2	0	0	0	0	2	1	1	0	0	0	2	0	0	1	0	0	2	1	3
chr01_59849804	chr01	59849804	solcap_snp_c2_56809	4	3	4	2	3	3	3	3	3	3	4	4	2	3	3	3	4	3	3	3	2	3	2	2	4	2	4	3	2	4	4	3	4	3	3	2	4	4	4	4	3	3	4	3	2	4
chr01_59851072	chr01	59851072	solcap_snp_c2_56812	3	3	4	4	4	4	4	4	4	4	4	4	4	3	4	4	3	4	4	4	4	4	4	4	4	4	4	4	4	4	4	4	3	4	3	4	4	4	2	4	4	4	4	4	4	4
chr01_59891820	chr01	59891820	candidate_SNP:59891819-59891820	4	4	4	4	4	4	4	4	4	4	3	4	4	4	4	4	4	4	4	4	4	4	3	4	4	4	4	3	4	4	4	4	4	4	4	4	3	4	4	4	3	4	4	4	4	4
chr01_59910389	chr01	59910389	candidate_SNP:59910388-59910389	4	4	3	4	3	4	4	4	4	4	4	4	4	4	4	4	4	4	4	3	4	4	4	4	4	4	4	4	4	4	4	4	4	3	3	4	4	4	4	4	4	4	4	4	4	3
chr01_59929870	chr01	59929870	ST4.03ch01_58283496	4	4	4	4	4	4	4	4	4	4	4	4	4	4	4	4	4	4	4	4	4	4	4	4	4	4	4	4	4	4	4	4	4	4	4	4	4	4	4	4	4	4	4	4	4	4
chr01_60061599	chr01	60061599	candidate_SNP:60061598-60061599	4	4	4	4	4	4	4	4	4	4	4	3	4	4	4	4	4	4	4	4	4	4	4	4	4	4	4	4	4	4	4	4	4	4	4	4	4	4	4	3	4	4	4	4	4	4
chr01_60100305	chr01	60100305	candidate_SNP:60100304-60100305	3	3	4	2	2	0	1	0	0	1	3	1	4	4	0	3	2	3	3	0	4	2	2	3	1	0	4	2	2	0	1	2	4	0	2	2	4	1	2	0	2	0	1	3	2	4
chr01_60208012	chr01	60208012	solcap_snp_c1_805	4	4	4	4	4	4	4	4	4	4	4	4	4	4	4	4	4	4	4	4	4	4	3	4	4	4	4	3	4	4	4	4	4	4	4	4	3	4	4	4	4	4	4	4	4	4
chr01_60211161	chr01	60211161	solcap_snp_c1_803	3	4	3	4	4	4	4	4	4	4	3	4	3	3	4	4	4	4	4	4	4	4	3	4	4	4	3	3	4	3	4	4	3	4	4	3	1	4	4	4	2	4	4	4	4	3
chr01_60314382	chr01	60314382	candidate_SNP:60314381-60314382	4	4	3	4	3	4	4	4	4	4	4	4	4	4	4	4	4	4	4	2	4	4	4	4	4	4	4	4	4	4	4	4	4	3	3	4	4	4	4	4	4	4	4	4	4	3
chr01_60332764	chr01	60332764	candidate_SNP:60332763-60332764	4	3	4	3	3	3	4	3	4	3	4	4	4	4	4	4	4	3	4	4	4	4	3	4	4	1	4	4	4	4	3	3	4	3	4	3	4	4	4	4	3	3	3	3	4	4
chr01_60335987	chr01	60335987	candidate_SNP:60335986-60335987	0	1	1	2	1	2	2	2	2	3	0	0	2	0	2	2	1	1	1	1	2	2	1	1	0	3	1	1	2	0	0	2	1	1	2	3	1	1	0	0	1	1	0	2	2	2
chr01_60371988	chr01	60371988	candidate_SNP:60371987-60371988	4	4	2	4	2	4	3	4	4	4	2	4	4	4	4	4	4	4	4	2	3	4	3	4	4	4	4	3	4	3	3	4	4	2	3	4	2	4	4	4	2	4	4	4	4	2
chr01_60377775	chr01	60377775	solcap_snp_c2_2653	1	3	1	2	2	3	1	3	2	4	0	3	4	3	4	3	2	2	0	1	1	2	2	4	2	4	3	2	4	1	2	4	1	3	0	4	3	1	0	2	2	2	1	3	1	2
chr01_60463391	chr01	60463391	solcap_snp_c2_2637	0	2	2	3	3	3	3	3	2	4	1	1	1	2	3	3	1	2	2	3	3	2	3	3	1	4	1	3	4	2	1	3	1	4	2	3	3	2	0	0	4	1	3	3	2	4
chr01_60478398	chr01	60478398	candidate_SNP:60478397-60478398	0	0	2	0	2	2	2	1	1	1	0	1	0	0	2	0	1	0	2	1	2	0	0	0	0	0	0	0	0	0	0	1	0	0	0	0	1	1	0	1	0	0	0	1	0	1
chr01_60515102	chr01	60515102	candidate_SNP:60515101-60515102	4	4	4	4	4	4	4	4	4	4	4	4	4	4	4	4	4	4	4	4	3	4	4	4	4	4	4	4	4	4	4	4	4	4	4	4	4	4	4	4	4	4	4	4	4	4
chr01_60535261	chr01	60535261	solcap_snp_c1_779	4	4	4	4	4	4	3	4	4	4	3	4	4	2	4	4	4	4	4	4	4	4	2	4	4	4	4	3	4	4	3	4	4	4	4	4	3	4	4	4	3	4	3	4	4	3
chr01_60575308	chr01	60575308	ST4.03ch01_58944812	2	2	4	2	3	2	4	2	2	3	3	4	3	3	2	2	2	4	2	3	1	2	2	4	2	1	4	2	3	2	3	2	1	3	2	2	4	3	1	3	3	2	3	3	1	4
chr01_60575982	chr01	60575982	candidate_SNP:60575981-60575982	0	1	3	3	2	1	2	1	3	2	4	3	1	2	2	3	0	3	3	1	1	0	1	3	0	0	2	1	3	1	2	2	2	3	0	1	1	3	0	1	1	0	0	4	0	3
chr01_60594399	chr01	60594399	candidate_SNP:60594398-60594399	4	4	4	4	4	4	4	4	4	4	4	4	4	4	4	4	4	4	4	4	4	4	4	4	4	4	4	4	4	4	4	4	4	4	4	4	4	4	4	4	4	4	4	4	4	4
chr01_60615725	chr01	60615725	solcap_snp_c2_2591	4	4	2	4	3	4	4	4	4	4	4	4	4	4	4	4	4	4	4	2	4	4	4	4	4	4	4	4	4	4	4	4	4	2	3	4	4	4	4	4	3	4	4	4	4	3
chr01_60618520	chr01	60618520	ST4.03ch01_58988206	4	4	2	4	3	4	4	4	4	4	4	4	4	4	4	4	4	4	4	2	4	4	4	4	4	4	4	4	4	4	4	4	4	2	2	4	4	4	4	4	2	4	4	4	4	3
chr01_60809477	chr01	60809477	solcap_snp_c2_45299	4	4	3	4	3	4	4	3	4	4	4	4	4	4	4	4	4	4	4	1	4	4	4	4	4	4	4	4	4	4	4	4	4	2	3	4	4	4	4	4	3	4	4	4	4	3
chr01_60882393	chr01	60882393	candidate_SNP:60882392-60882393	4	4	4	4	4	4	3	4	4	3	3	4	4	3	4	4	4	4	4	4	4	4	4	4	4	4	4	3	4	4	3	4	4	4	4	4	2	4	4	4	4	4	1	4	3	4
chr01_60889600	chr01	60889600	solcap_snp_c2_45289	2	2	3	1	2	2	3	2	1	3	2	3	2	3	2	1	1	2	3	3	2	1	2	1	2	1	3	2	3	2	2	2	1	3	1	3	4	2	0	2	3	1	2	3	1	4
chr01_60966811	chr01	60966811	candidate_SNP:60966810-60966811	4	4	4	3	4	4	2	4	4	4	3	4	3	3	4	4	3	4	4	4	2	4	3	3	4	4	4	3	3	2	4	4	2	4	3	3	3	4	4	4	4	4	4	4	2	3
chr01_60987364	chr01	60987364	solcap_snp_c2_45302	4	4	4	4	4	4	4	4	4	4	3	4	4	4	4	4	4	4	4	4	4	4	4	4	4	4	4	4	4	4	4	4	4	4	4	4	4	4	4	4	3	4	3	4	4	4
chr01_60989413	chr01	60989413	solcap_snp_c1_13430	3	4	2	4	4	4	4	4	4	4	3	3	3	2	4	4	4	4	4	1	3	4	3	4	4	4	3	3	4	3	3	4	3	2	2	3	1	4	4	3	2	3	2	4	3	3
chr01_60989983	chr01	60989983	PotVar0018694	4	4	2	4	4	4	4	4	4	4	4	4	4	3	4	4	4	4	4	2	3	4	4	4	4	4	4	3	4	3	4	4	3	2	3	4	3	4	4	4	3	4	4	4	4	3
chr01_60990012	chr01	60990012	PotVar0018693	4	4	3	4	4	4	4	4	4	4	4	4	4	4	4	4	4	4	4	3	4	4	4	4	4	4	4	4	4	4	4	4	4	3	3	4	4	4	4	4	4	4	4	4	4	3
chr01_60990141	chr01	60990141	PotVar0018687	4	4	4	4	4	4	4	3	3	4	4	4	4	4	3	4	4	4	4	4	4	4	4	4	4	4	4	3	4	4	4	4	3	4	4	4	3	4	4	4	4	4	4	4	3	4
chr01_60990156	chr01	60990156	PotVar0018685	3	3	1	2	2	1	1	2	3	2	3	2	2	3	2	2	2	3	3	1	1	2	3	3	3	3	1	2	3	1	2	2	2	1	1	2	0	3	1	2	2	2	3	3	2	2
chr01_61021540	chr01	61021540	candidate_SNP:61021539-61021540	4	4	4	4	4	4	4	4	4	4	4	4	4	4	4	4	4	4	4	4	4	4	4	4	4	4	4	4	4	4	4	4	4	4	4	4	4	4	4	4	4	4	3	4	4	4
chr01_61023187	chr01	61023187	candidate_SNP:61023186-61023187	4	4	4	4	4	4	4	4	4	4	4	4	4	4	4	4	4	4	4	4	4	4	4	4	4	4	4	4	4	4	4	4	4	4	4	4	4	4	4	4	4	4	3	4	4	4
chr01_61063968	chr01	61063968	candidate_SNP:61063967-61063968	4	4	3	4	3	4	4	4	4	4	4	4	4	4	4	4	4	4	4	3	4	4	4	4	4	4	4	4	4	4	4	4	4	2	3	4	4	4	4	4	3	4	4	4	4	2
chr01_61092788	chr01	61092788	candidate_SNP:61092787-61092788	4	4	4	4	4	4	4	4	4	4	3	4	4	4	4	4	4	4	4	4	4	4	4	4	4	4	4	4	4	4	4	4	4	4	4	4	4	4	4	4	4	4	4	4	4	4
chr01_61102921	chr01	61102921	solcap_snp_c2_55151	2	1	1	1	1	1	2	1	1	1	1	1	1	2	1	1	1	2	1	1	0	1	1	2	2	1	0	1	2	2	1	1	2	1	2	1	1	1	1	1	1	2	1	2	0	1
chr01_61127965	chr01	61127965	candidate_SNP:61127964-61127965	3	4	3	4	3	3	3	3	4	2	4	4	4	3	4	4	3	4	3	4	4	4	4	4	4	4	4	4	4	3	3	3	3	4	3	4	3	3	3	4	4	3	4	4	4	2
chr01_61466758	chr01	61466758	ST4.03ch01_59830209	4	4	4	4	4	4	4	4	4	4	4	4	4	4	4	4	4	4	4	4	4	4	4	4	4	4	4	4	4	4	4	4	4	4	4	4	4	4	4	4	4	3	3	4	4	4
chr01_61468806	chr01	61468806	ST4.03ch01_59832257	4	4	4	4	4	4	4	4	4	4	4	4	4	4	4	4	4	4	4	4	4	4	4	4	4	4	4	4	4	4	4	4	4	4	4	4	4	4	4	4	4	3	3	4	4	4
chr01_61608599	chr01	61608599	solcap_snp_c2_46520	4	3	4	2	4	2	3	2	3	3	3	4	3	3	3	3	4	4	3	2	3	4	3	4	4	2	4	3	2	4	4	3	3	4	4	3	4	4	1	4	4	3	4	3	3	4
chr01_61611974	chr01	61611974	ST4.03ch01_59977791	3	1	3	3	3	4	3	4	4	3	3	3	3	2	3	3	4	2	1	3	4	3	3	3	3	2	4	3	1	3	3	3	4	3	4	3	2	3	4	4	3	3	3	1	4	4
chr01_61831188	chr01	61831188	candidate_SNP:61831187-61831188	3	4	4	4	3	3	4	3	4	3	4	3	3	4	4	4	2	4	3	4	4	4	4	4	4	4	3	4	4	4	4	3	4	4	4	3	3	3	4	3	4	4	4	4	4	2
chr01_61848753	chr01	61848753	candidate_SNP:61848752-61848753	4	3	4	3	4	4	4	4	4	3	4	4	4	4	3	3	4	4	4	4	4	4	4	4	3	3	4	3	3	4	4	4	4	3	4	3	4	4	4	4	3	3	3	3	4	4
chr01_61853240	chr01	61853240	solcap_snp_c2_35544	3	2	3	2	2	1	2	1	2	1	4	2	1	2	2	3	4	4	2	3	3	3	3	4	4	2	1	3	4	4	4	3	4	4	4	2	1	2	4	3	4	3	4	3	3	2
chr01_61860800	chr01	61860800	candidate_SNP:61860799-61860800	4	4	4	4	4	4	4	4	4	4	4	4	4	4	4	4	4	4	4	4	4	4	4	4	4	4	4	4	4	4	4	4	4	4	4	4	4	4	4	4	4	3	3	4	4	4
chr01_61883802	chr01	61883802	solcap_snp_c2_35483	4	4	4	4	4	4	4	4	4	4	3	4	4	4	4	4	4	4	4	4	3	4	4	4	4	4	4	4	4	3	3	4	4	4	4	4	3	4	4	4	3	3	3	4	4	3
chr01_61889600	chr01	61889600	candidate_SNP:61889599-61889600	4	4	4	4	4	4	3	4	4	4	4	4	4	3	4	4	4	4	4	4	4	4	4	4	4	4	4	4	4	3	3	4	4	4	4	4	3	4	4	4	4	4	4	4	4	3
chr01_61946872	chr01	61946872	ST4.03ch01_60303616	2	2	3	3	3	2	2	2	3	2	4	3	2	3	3	3	3	4	2	3	3	3	3	4	4	3	2	2	3	4	4	3	3	4	3	2	2	3	2	3	4	3	4	3	2	2
chr01_62041095	chr01	62041095	ST4.03ch01_60397400	1	1	3	3	2	1	3	1	2	1	3	2	0	1	3	3	3	2	0	3	3	2	2	2	3	1	2	3	2	3	3	1	3	4	3	2	3	2	2	3	4	3	4	2	2	2
chr01_62056358	chr01	62056358	ST4.03ch01_60412663	3	4	1	3	2	4	4	4	3	4	2	3	4	4	2	3	2	3	4	2	4	3	3	3	2	4	2	3	4	2	1	3	3	2	2	4	4	2	2	2	3	3	2	4	3	3
chr01_62066398	chr01	62066398	candidate_SNP:62066397-62066398	0	0	0	0	0	0	0	0	1	0	0	1	0	0	0	0	0	0	0	0	0	0	0	0	0	0	0	0	0	0	0	0	0	0	0	0	0	0	0	2	0	0	0	1	0	NA
chr01_62077554	chr01	62077554	solcap_snp_c2_35511	1	0	3	2	2	1	2	2	2	0	3	3	1	1	1	1	3	1	0	2	3	2	2	2	1	1	4	3	0	3	2	1	3	3	3	3	3	1	2	4	3	2	2	1	2	2
chr01_62078394	chr01	62078394	candidate_SNP:62078393-62078394	4	4	4	4	4	4	4	4	4	4	4	4	4	4	4	4	4	4	4	4	4	4	4	4	4	4	4	4	4	4	4	4	4	4	4	4	4	4	4	4	4	3	3	4	4	4
chr01_62081590	chr01	62081590	candidate_SNP:62081589-62081590	3	4	4	4	4	4	4	4	4	4	4	3	4	4	4	4	4	4	4	4	4	4	4	4	4	4	1	4	4	4	4	4	4	4	4	3	3	4	4	3	4	4	4	4	4	4
chr01_62156035	chr01	62156035	solcap_snp_c2_35518	4	3	4	3	4	2	3	1	2	3	4	4	2	4	3	3	4	4	3	3	3	3	3	4	4	3	4	3	3	4	4	2	4	4	3	3	4	4	4	4	4	3	4	3	2	4
chr01_62160429	chr01	62160429	solcap_snp_c2_35537	4	4	4	3	4	4	4	4	4	4	4	4	4	4	4	3	3	3	4	4	1	3	2	3	3	3	4	3	4	4	4	4	2	3	3	3	3	4	4	4	2	4	4	4	3	4
chr01_62165127	chr01	62165127	solcap_snp_c2_35539	3	4	1	3	2	4	4	4	3	4	2	3	4	4	2	3	2	3	4	2	4	3	3	3	3	4	1	3	4	2	2	3	3	2	3	4	4	3	2	2	3	2	2	4	3	3
chr01_62219719	chr01	62219719	ST4.03ch01_60575745	4	4	4	4	4	4	4	4	4	4	3	4	4	4	4	4	4	4	4	4	4	4	4	4	4	4	4	4	4	4	4	4	4	4	4	4	4	4	4	4	3	3	3	4	4	4
chr01_62227974	chr01	62227974	candidate_SNP:62227973-62227974	3	4	2	3	1	4	4	4	3	4	2	3	4	4	2	3	2	3	4	2	4	2	3	2	3	4	2	3	4	3	2	3	3	2	1	4	4	2	2	2	3	3	2	4	2	3
chr01_62365592	chr01	62365592	candidate_SNP:62365591-62365592	4	3	4	3	4	2	3	1	2	3	4	4	3	4	2	3	4	4	3	3	1	3	3	4	4	3	4	3	3	4	4	3	4	4	4	3	4	4	4	4	4	3	4	4	2	4
chr01_62501577	chr01	62501577	candidate_SNP:62501576-62501577	3	3	4	3	4	2	3	2	2	3	3	4	2	3	3	3	4	4	3	3	3	3	3	4	4	3	4	3	4	4	4	3	4	4	4	3	4	4	4	4	2	3	4	3	1	4
chr01_62504408	chr01	62504408	PotVar0124717	3	3	1	2	2	2	3	2	1	3	2	3	2	4	2	2	2	3	3	1	3	2	2	2	3	3	2	2	3	2	2	2	3	2	1	2	4	2	2	2	3	2	2	3	1	3
chr01_62504501	chr01	62504501	PotVar0124722	1	1	3	3	2	3	2	3	4	1	3	2	2	1	3	3	3	3	1	3	4	3	3	3	2	3	3	3	2	3	3	3	3	3	4	4	2	2	2	3	3	3	3	1	4	2
chr01_62507478	chr01	62507478	candidate_SNP:62507477-62507478	3	4	4	4	3	4	4	4	4	4	4	3	4	3	3	4	4	3	2	3	4	3	4	3	3	4	4	4	4	4	4	3	4	4	4	4	4	4	4	4	4	4	4	1	4	4
chr01_62520797	chr01	62520797	candidate_SNP:62520796-62520797	4	4	4	4	4	4	4	4	4	4	3	4	4	4	4	4	4	4	4	4	4	4	4	4	4	4	4	4	4	4	4	4	4	4	4	4	4	4	4	4	4	4	4	4	4	4
chr01_62546247	chr01	62546247	candidate_SNP:62546246-62546247	2	2	2	3	3	4	4	4	4	4	4	1	2	0	4	3	2	2	1	4	1	2	3	1	3	2	2	2	3	3	2	3	0	3	3	2	3	3	3	4	2	4	4	3	4	4
chr01_62551405	chr01	62551405	solcap_snp_c2_56267	3	4	1	3	2	4	4	4	3	4	2	3	4	4	2	3	2	3	4	2	4	3	3	3	3	4	2	3	4	2	2	3	3	2	2	3	4	2	2	2	3	3	2	4	3	3
chr01_62567109	chr01	62567109	candidate_SNP:62567108-62567109	3	3	3	2	3	2	4	3	3	2	2	2	4	3	4	2	2	4	1	3	4	3	2	2	1	2	3	3	NA	3	4	1	3	3	2	4	3	2	2	3	4	3	4	4	4	4
chr01_62568795	chr01	62568795	candidate_SNP:62568794-62568795	4	4	4	4	4	4	3	4	4	4	4	4	4	4	NA	4	4	4	4	4	4	4	3	4	4	4	4	4	4	4	4	4	3	4	3	4	4	4	4	4	4	4	3	4	4	4
chr01_62583440	chr01	62583440	solcap_snp_c2_20798	4	3	4	3	3	4	4	4	4	4	4	3	4	1	4	3	4	4	4	4	2	3	2	2	3	2	3	3	3	3	4	3	3	4	2	4	3	4	4	4	4	4	4	4	3	4
chr01_62583473	chr01	62583473	solcap_snp_c2_20799	4	3	4	3	3	4	4	4	4	4	4	3	4	2	4	3	4	4	4	4	2	3	2	2	3	2	3	2	3	3	4	2	3	4	2	4	3	4	4	4	4	4	4	4	3	4
chr01_62618317	chr01	62618317	solcap_snp_c2_20803	3	4	1	3	2	4	4	4	3	4	2	3	4	4	2	3	2	3	4	2	4	3	3	2	3	4	3	3	4	2	2	3	3	2	2	3	4	2	2	3	3	2	2	4	3	3
chr01_62709330	chr01	62709330	solcap_snp_c2_20823	3	3	1	3	2	3	4	2	1	2	1	1	1	4	1	1	2	3	3	0	3	2	2	3	3	3	3	2	4	0	1	1	3	3	2	2	4	2	1	2	3	2	3	2	2	3
chr01_62718288	chr01	62718288	solcap_snp_c2_20829	4	4	2	4	2	4	4	4	2	4	3	4	4	4	4	4	3	4	4	4	4	4	3	3	4	4	3	3	4	3	2	4	4	2	3	4	4	4	4	4	3	4	4	4	4	4
chr01_62789597	chr01	62789597	candidate_SNP:62789596-62789597	1	1	1	1	0	1	1	1	1	1	0	2	1	0	1	1	0	1	0	0	0	0	0	1	1	1	1	1	2	0	0	0	1	1	0	0	2	0	1	2	1	1	1	2	0	0
chr01_62802539	chr01	62802539	solcap_snp_c2_20858	2	2	2	1	2	3	3	3	1	3	3	2	2	4	0	2	2	3	3	2	3	2	1	2	2	3	3	2	3	1	1	2	2	4	1	2	4	2	3	3	4	2	3	3	1	3
chr01_62803048	chr01	62803048	ST4.03ch01_61220900	3	4	3	3	2	4	4	4	3	4	2	3	4	4	2	3	2	3	4	4	4	3	3	3	3	4	2	3	4	2	2	3	3	4	3	3	4	2	2	2	4	3	2	4	3	4
chr01_62803049	chr01	62803049	ST4.03ch01_61220901	4	3	2	3	4	3	3	3	2	3	4	3	2	4	3	3	4	4	3	3	2	3	3	4	4	3	4	3	3	3	3	3	4	4	2	3	4	4	4	4	4	3	4	3	2	3
chr01_62803114	chr01	62803114	ST4.03ch01_61220966	4	4	4	4	4	4	4	4	4	4	4	4	4	4	4	4	4	4	4	4	3	4	4	4	4	4	4	4	4	4	4	4	4	4	4	4	4	4	4	4	4	3	3	4	4	4
chr01_62807554	chr01	62807554	ST4.03ch01_61225406	4	3	3	3	4	3	3	3	3	3	4	3	2	4	3	3	4	4	3	3	2	3	3	4	4	3	4	3	3	3	3	3	4	4	2	3	4	4	4	4	4	3	4	3	2	3
chr01_62844026	chr01	62844026	PotVar0006142	3	3	4	4	3	2	3	3	4	2	3	4	3	3	4	4	3	3	2	3	4	3	4	4	3	3	4	4	4	4	4	3	4	4	4	4	4	2	4	4	4	4	4	3	4	2
chr01_62844045	chr01	62844045	PotVar0006140	3	3	1	1	2	3	3	3	1	3	1	2	3	4	1	2	2	3	3	3	3	2	2	3	3	3	2	2	2	1	1	2	2	4	1	1	4	3	2	2	4	1	2	3	0	3
chr01_62852691	chr01	62852691	candidate_SNP:62852690-62852691	4	3	4	3	4	4	4	4	4	3	4	4	4	4	3	3	4	4	4	4	4	4	4	4	3	4	4	3	3	4	4	4	4	3	4	4	4	4	4	4	3	3	3	2	4	4
chr01_62853255	chr01	62853255	PotVar0006051	2	2	4	3	2	1	3	2	4	1	3	4	4	4	3	3	3	3	2	1	4	3	4	4	2	3	4	3	2	4	4	3	4	1	4	4	2	3	4	4	1	3	4	1	4	2
chr01_62853267	chr01	62853267	PotVar0006050	3	3	3	2	3	4	2	4	4	4	3	3	3	0	4	3	3	3	4	4	2	3	2	3	3	2	1	2	3	3	3	4	1	3	3	1	2	4	3	3	3	3	2	4	3	3
chr01_62854689	chr01	62854689	PotVar0005924	4	4	4	4	4	4	4	4	4	4	4	4	4	4	4	4	4	4	4	4	3	4	4	4	4	4	4	4	4	4	4	4	4	4	4	4	4	4	4	4	4	4	4	4	4	4
chr01_62862400	chr01	62862400	candidate_SNP:62862399-62862400	3	3	4	4	4	4	4	4	4	4	2	4	3	3	4	4	4	3	2	3	4	3	4	4	3	3	4	4	4	4	4	4	4	4	4	4	4	3	4	4	4	4	4	3	4	4
chr01_62873940	chr01	62873940	ST4.03ch01_61301899	3	2	1	1	1	3	2	3	1	3	1	2	2	1	1	1	1	2	3	2	0	1	0	1	2	2	1	2	2	0	0	1	1	3	0	0	2	1	3	2	2	1	1	2	0	2
chr01_62873951	chr01	62873951	ST4.03ch01_61301910	4	4	3	3	2	4	4	4	3	4	2	3	3	4	2	3	2	3	4	4	4	3	3	3	3	4	2	3	3	2	3	3	3	4	4	3	4	2	3	3	4	3	2	4	3	4
chr01_62874015	chr01	62874015	ST4.03ch01_61301974	3	2	1	1	1	3	2	3	1	3	1	2	2	1	1	1	1	2	3	2	0	1	0	1	2	2	1	2	2	0	0	1	1	3	0	0	2	2	2	2	2	1	1	2	0	2
chr01_62880192	chr01	62880192	ST4.03ch01_61308151	4	4	4	4	4	4	4	4	4	4	4	4	4	4	4	4	4	4	4	4	3	4	4	4	4	4	4	4	4	4	4	4	4	4	4	4	4	4	4	4	4	4	4	4	4	4
chr01_62881597	chr01	62881597	candidate_SNP:62881596-62881597	3	3	4	3	3	4	4	4	4	4	1	4	3	1	4	3	3	2	1	2	2	2	2	2	2	2	3	3	4	4	4	3	2	3	3	3	3	2	4	4	2	4	4	2	3	4
chr01_62882946	chr01	62882946	solcap_snp_c2_20890	4	3	1	2	2	3	3	3	1	3	2	2	2	4	1	2	2	3	3	2	3	2	2	3	3	3	2	2	3	1	1	2	3	4	2	2	4	2	3	3	4	2	2	3	1	3
chr01_62900290	chr01	62900290	solcap_snp_c2_20895	4	3	4	3	2	2	2	2	4	2	3	4	4	2	4	3	3	3	3	4	3	3	1	1	3	3	3	3	3	4	4	2	3	3	3	1	3	2	4	4	2	4	4	3	3	1
chr01_62902378	chr01	62902378	candidate_SNP:62902377-62902378	3	3	2	2	2	3	3	3	2	2	3	2	3	4	1	2	3	3	3	3	3	2	2	3	3	3	2	3	2	1	2	3	3	4	2	3	4	2	3	3	4	2	2	3	1	2
chr01_63029308	chr01	63029308	ST4.03ch01_61466522	4	4	4	4	4	4	4	4	4	4	3	4	4	4	4	4	4	4	4	4	4	4	4	4	4	4	4	4	4	4	4	4	4	4	4	4	4	4	4	4	3	4	4	4	4	4
chr01_63052751	chr01	63052751	candidate_SNP:63052750-63052751	4	4	3	3	3	4	4	4	3	4	3	2	2	4	2	3	2	3	4	4	4	3	3	3	3	4	2	3	4	2	2	3	3	4	4	3	4	3	3	2	4	3	3	4	3	4
chr01_63101594	chr01	63101594	candidate_SNP:63101593-63101594	1	0	1	0	0	1	0	1	1	0	0	1	1	0	0	0	0	1	0	0	0	0	0	1	1	1	1	0	1	0	0	0	0	0	0	0	1	0	0	1	0	0	0	0	0	0
chr01_63102396	chr01	63102396	candidate_SNP:63102395-63102396	4	3	1	2	2	3	3	3	1	3	2	3	2	4	1	2	2	3	3	3	2	2	2	3	3	3	2	2	2	2	2	2	3	4	2	2	4	2	3	3	4	3	3	3	1	3
chr01_63102953	chr01	63102953	solcap_snp_c2_20926	4	3	4	4	4	4	3	4	4	4	4	4	4	3	4	4	4	4	4	2	4	4	4	4	4	4	4	4	4	4	4	4	4	2	4	4	3	4	4	4	3	4	4	4	4	4
chr01_63271681	chr01	63271681	ST4.03ch01_61708601	3	4	4	4	4	4	4	4	4	4	4	3	3	4	4	4	4	4	4	4	4	4	4	4	4	4	3	4	4	4	4	4	4	4	4	4	3	4	4	3	4	4	4	4	4	4
chr01_63294784	chr01	63294784	PotVar0049777	3	4	4	3	2	2	3	2	4	2	4	3	3	4	4	3	2	3	3	4	2	3	3	2	3	3	3	3	3	4	4	2	2	3	1	2	3	3	3	3	3	4	3	4	2	2
chr01_63295423	chr01	63295423	PotVar0049721	2	3	4	4	4	4	4	4	4	4	3	3	1	3	4	4	4	3	2	3	4	3	4	4	3	3	3	4	4	4	4	4	4	4	4	4	3	3	4	3	4	4	4	2	4	4
chr01_63295742	chr01	63295742	PotVar0049699	4	4	4	4	4	4	4	4	4	4	4	4	4	3	4	4	4	4	4	4	4	4	4	4	4	4	4	4	4	4	4	4	4	4	4	4	4	4	4	4	3	4	4	4	4	4
chr01_63295950	chr01	63295950	PotVar0049691	4	3	3	3	3	4	3	4	2	3	2	3	3	4	2	3	3	3	4	2	4	4	2	4	3	4	3	2	1	3	2	3	3	2	4	3	3	2	3	3	2	3	3	4	3	4
chr01_63365709	chr01	63365709	ST4.03ch01_61844074	4	3	2	3	3	1	3	3	1	2	4	3	3	4	3	3	4	4	3	4	4	2	3	4	4	3	4	2	4	4	4	2	4	4	3	3	4	4	4	3	4	2	3	3	2	2
chr01_63507175	chr01	63507175	candidate_SNP:63507174-63507175	4	4	2	3	3	3	3	3	2	4	4	4	3	4	3	3	4	4	3	4	3	2	3	4	4	2	4	3	4	3	4	4	4	4	2	3	4	4	4	4	4	2	3	3	3	2
chr01_63512800	chr01	63512800	candidate_SNP:63512799-63512800	4	4	NA	4	4	4	4	4	4	4	4	4	4	4	4	4	4	4	4	4	3	4	4	4	4	4	4	4	4	4	4	4	4	4	4	NA	4	4	3	4	4	3	4	4	NA	4
chr01_63550791	chr01	63550791	ST4.03ch01_62006892	2	2	1	2	2	0	1	2	3	1	4	1	3	2	3	2	3	2	2	4	0	2	2	1	3	2	2	1	1	3	2	2	1	3	0	2	2	2	3	1	3	4	2	3	1	0
chr01_63551211	chr01	63551211	ST4.03ch01_62007312	2	3	3	3	2	2	3	2	4	2	4	1	4	2	4	2	3	2	3	4	2	3	3	1	3	3	2	3	2	3	3	1	2	3	2	3	3	3	3	2	3	4	4	4	3	2
chr01_63554342	chr01	63554342	solcap_snp_c2_38436	4	4	4	4	4	4	4	4	4	4	4	4	4	4	4	4	4	4	4	2	4	4	4	4	4	4	4	4	4	4	4	4	4	3	4	4	3	4	4	4	3	4	4	4	4	4
chr01_63556750	chr01	63556750	candidate_SNP:63556749-63556750	1	1	3	1	3	3	3	3	1	3	0	3	0	2	1	2	0	3	1	0	3	1	2	3	2	2	2	2	1	2	1	3	3	2	4	2	1	1	1	2	1	0	1	1	2	4
chr01_63632789	chr01	63632789	candidate_SNP:63632788-63632789	4	4	1	3	3	4	2	3	3	3	4	4	2	2	3	2	4	4	3	4	3	3	4	4	4	3	4	4	4	3	3	3	4	4	1	4	3	4	4	4	4	4	4	2	2	3
chr01_63687206	chr01	63687206	solcap_snp_c2_38405	1	3	4	3	3	4	3	4	4	4	4	2	3	2	4	3	4	3	2	2	2	2	2	2	2	2	2	3	3	4	4	3	1	2	2	2	2	3	1	2	3	4	4	3	3	4
chr01_63690435	chr01	63690435	solcap_snp_c2_38404	3	4	4	3	2	4	4	4	4	4	4	2	4	3	4	2	4	3	4	4	2	2	2	2	3	3	3	3	3	4	4	3	2	3	2	3	3	4	3	2	3	4	4	4	2	4
chr01_63695674	chr01	63695674	PotVar0049651	2	2	1	0	1	3	1	3	2	2	0	3	1	2	0	0	1	2	3	1	0	1	0	1	1	3	0	0	3	1	2	1	0	0	0	2	1	2	0	1	0	0	0	1	0	3
chr01_63696345	chr01	63696345	PotVar0049593	3	4	4	2	3	4	4	4	4	4	4	2	4	3	4	3	4	3	4	4	2	3	3	2	3	3	2	4	3	4	4	3	3	3	3	3	4	4	3	2	3	4	4	4	3	4
chr01_63700754	chr01	63700754	candidate_SNP:63700753-63700754	4	4	4	4	4	4	4	4	4	4	4	4	4	4	4	4	4	4	4	3	4	4	4	4	4	4	4	4	4	4	4	4	4	3	4	4	4	4	4	4	3	4	4	4	4	4
chr01_63714332	chr01	63714332	candidate_SNP:63714331-63714332	4	4	4	4	4	4	4	4	4	4	4	4	4	4	4	4	4	3	4	4	4	4	4	3	4	3	4	4	3	4	4	4	4	4	4	4	4	4	4	4	4	4	4	4	4	4
chr01_63791190	chr01	63791190	candidate_SNP:63791189-63791190	2	3	2	2	3	4	4	4	2	3	4	4	3	1	3	2	4	3	2	3	1	2	2	3	4	1	3	2	3	4	4	2	4	4	1	2	3	3	3	4	4	4	2	2	3	3
chr01_63795993	chr01	63795993	candidate_SNP:63795992-63795993	4	3	4	3	4	4	4	4	4	4	4	4	4	4	3	4	4	4	4	4	4	4	4	4	3	4	4	4	3	4	4	4	4	3	4	4	4	4	4	4	4	4	3	3	4	4
chr01_63806397	chr01	63806397	candidate_SNP:63806396-63806397	4	4	4	3	3	3	2	3	3	3	3	3	4	2	4	3	3	4	4	3	4	4	3	3	4	1	4	4	1	3	3	4	4	4	4	4	1	4	4	4	4	4	2	3	3	1
chr01_63814398	chr01	63814398	candidate_SNP:63814397-63814398	3	4	4	3	3	4	4	4	4	4	4	2	4	3	4	3	3	2	4	4	2	4	2	2	4	2	2	4	2	4	4	3	3	3	3	3	4	4	3	1	3	4	4	4	3	4
chr01_63863949	chr01	63863949	candidate_SNP:63863948-63863949	0	0	0	0	0	0	0	0	0	0	NA	0	0	0	0	0	0	0	0	1	0	0	0	0	0	0	0	0	0	0	0	0	0	1	0	0	0	0	0	0	1	0	0	0	0	0
chr01_63978739	chr01	63978739	solcap_snp_c2_41951	1	3	3	1	2	2	3	2	3	2	0	2	2	2	1	1	0	1	4	3	2	2	1	1	1	2	2	2	1	1	2	2	0	1	2	1	2	1	0	1	1	0	1	0	1	4
chr01_63981597	chr01	63981597	candidate_SNP:63981596-63981597	4	4	4	4	4	4	4	4	4	4	4	4	4	4	4	4	4	4	4	3	4	4	4	4	4	4	4	4	4	4	4	4	4	3	4	4	4	4	4	4	3	4	4	4	4	4
chr01_64045596	chr01	64045596	ST4.03ch01_62508747	4	3	3	3	3	4	2	4	2	2	4	4	3	4	3	3	4	3	3	4	2	3	3	2	4	2	4	2	2	3	4	3	4	4	2	2	2	4	4	4	4	4	3	4	3	2
chr01_64076664	chr01	64076664	ST4.03ch01_62540820	4	2	2	3	3	4	2	4	2	3	4	4	3	2	3	3	4	4	3	4	2	3	3	3	4	3	4	2	3	2	3	3	4	4	2	3	2	4	4	4	4	4	3	4	3	2
chr01_64135353	chr01	64135353	PotVar0049521	2	2	3	4	2	3	4	3	4	4	4	3	3	2	4	4	3	2	2	3	3	3	1	4	3	3	3	4	4	4	4	3	3	4	3	4	4	3	4	2	4	4	4	3	2	4
chr01_64140771	chr01	64140771	candidate_SNP:64140770-64140771	2	1	3	4	2	3	4	2	4	3	4	3	3	2	4	4	2	2	2	4	3	3	3	4	3	3	2	4	4	4	4	4	3	4	2	4	4	4	2	2	4	4	4	3	3	4
chr01_64144659	chr01	64144659	candidate_SNP:64144658-64144659	4	3	4	3	4	4	4	4	4	4	4	4	4	4	3	3	4	4	4	3	4	4	4	4	3	4	4	3	2	4	4	4	4	3	4	3	4	4	4	4	2	3	4	2	4	4
chr01_64146930	chr01	64146930	solcap_snp_c1_12118	2	4	3	2	3	2	1	2	2	2	0	1	2	3	2	2	3	2	3	2	3	2	3	2	2	3	2	3	2	1	1	3	1	2	3	2	2	2	1	2	2	1	2	4	3	3
chr01_64151996	chr01	64151996	candidate_SNP:64151995-64151996	4	2	2	3	3	4	4	4	2	2	4	4	3	4	3	3	4	4	3	4	2	3	3	2	4	3	4	2	2	4	4	3	4	4	3	3	2	4	4	4	4	4	3	4	3	3
chr01_64164582	chr01	64164582	candidate_SNP:64164581-64164582	4	2	4	3	4	4	4	4	4	4	4	4	4	4	3	3	4	4	4	3	4	4	4	4	3	4	4	3	3	4	4	4	4	2	4	3	4	4	4	4	2	3	3	2	4	4
chr01_64177480	chr01	64177480	candidate_SNP:64177479-64177480	0	1	0	1	0	0	0	0	0	0	0	0	0	0	1	1	0	0	0	1	0	0	0	0	1	0	0	0	0	0	0	0	0	1	0	0	0	0	0	0	1	1	1	1	0	0
chr01_64182066	chr01	64182066	solcap_snp_c2_41363	2	4	3	2	3	1	1	2	2	3	0	2	1	2	2	2	1	2	3	2	3	3	3	2	2	2	2	3	3	1	1	1	1	2	3	2	2	1	1	2	2	2	2	4	4	2
chr01_64187162	chr01	64187162	candidate_SNP:64187161-64187162	4	3	2	3	3	4	4	4	2	3	4	4	3	4	3	3	4	4	3	4	2	3	3	2	4	3	4	2	2	4	4	3	4	4	2	3	3	4	4	4	4	4	3	4	3	3
chr01_64255621	chr01	64255621	solcap_snp_c2_41926	4	3	4	3	3	4	3	4	2	3	4	4	3	3	3	3	4	3	3	4	2	3	3	3	4	3	4	3	2	3	3	3	4	4	3	3	2	4	4	4	4	4	3	4	3	3
chr01_64268776	chr01	64268776	candidate_SNP:64268775-64268776	4	3	4	3	3	4	3	4	3	3	4	4	2	3	2	3	4	3	3	4	2	3	3	2	4	2	4	3	1	3	3	3	4	4	3	4	1	4	4	4	4	4	3	4	3	3
chr01_64271971	chr01	64271971	candidate_SNP:64271970-64271971	4	3	4	3	3	4	4	4	2	3	4	4	3	4	3	3	4	4	3	4	2	3	3	2	4	3	4	2	2	4	4	3	4	4	3	3	3	4	4	4	4	4	3	4	3	4
chr01_64275269	chr01	64275269	solcap_snp_c2_41927	2	3	4	4	3	2	4	2	4	3	4	2	3	2	4	4	2	4	2	2	3	2	3	4	3	4	2	4	4	2	2	3	3	4	3	4	4	3	3	1	4	4	4	3	2	4
chr01_64278383	chr01	64278383	candidate_SNP:64278382-64278383	3	3	0	2	3	2	0	2	2	3	1	1	2	4	2	1	2	0	3	3	4	3	3	3	3	4	3	3	3	2	3	3	1	1	2	0	1	3	1	4	2	1	1	4	4	0
chr01_64301861	chr01	64301861	ST4.03ch01_62768987	2	3	1	1	2	2	0	1	0	1	1	1	1	2	1	1	1	1	2	2	1	2	2	0	2	1	2	1	1	2	2	1	1	1	1	0	0	2	1	3	1	1	1	3	2	0
chr01_64323894	chr01	64323894	ST4.03ch01_62790940	4	3	4	3	3	4	3	4	2	3	3	4	3	3	3	3	4	3	3	3	2	2	3	2	4	2	4	2	2	1	1	3	4	4	3	3	2	4	4	3	4	4	3	3	3	3
chr01_64327699	chr01	64327699	ST4.03ch01_62794745	2	4	1	2	3	3	2	2	2	2	1	1	1	3	3	2	1	2	2	1	3	3	2	2	2	3	1	2	2	3	4	2	1	1	2	1	2	2	0	2	1	1	2	3	2	1
chr01_64339996	chr01	64339996	solcap_snp_c2_41262	4	3	4	3	3	4	4	4	2	3	4	4	3	4	3	3	4	4	3	4	2	3	3	3	4	3	4	2	2	4	4	3	4	4	3	3	3	4	4	4	4	4	3	4	2	4
chr01_64343180	chr01	64343180	candidate_SNP:64343179-64343180	4	4	4	4	4	4	3	4	4	4	4	4	4	3	4	4	4	4	4	4	4	4	4	4	4	4	4	4	4	4	3	4	4	4	4	4	3	4	4	4	4	4	4	4	4	3
chr01_64383212	chr01	64383212	ST4.03ch01_62850918	4	3	4	3	3	4	4	4	3	3	4	4	3	4	3	3	4	4	3	4	3	3	3	2	4	3	4	2	2	4	4	3	4	4	3	3	3	4	4	4	4	4	3	4	3	4
chr01_64389024	chr01	64389024	PotVar0049270	4	4	4	4	4	4	4	4	4	4	3	4	4	4	4	4	4	4	4	4	4	3	4	4	4	4	4	4	4	3	3	4	4	4	4	4	4	4	4	3	4	4	4	4	4	4
chr01_64391153	chr01	64391153	candidate_SNP:64391152-64391153	4	4	4	4	4	4	4	4	4	4	4	4	4	4	4	4	4	4	4	2	4	4	4	4	4	4	4	4	4	4	4	4	4	3	4	3	4	4	4	4	3	4	4	3	4	4
chr01_64391832	chr01	64391832	ST4.03ch01_62859538	2	4	1	1	2	1	1	2	1	3	1	1	2	3	2	2	1	2	3	3	2	3	3	2	2	3	2	2	4	4	3	2	1	2	3	3	3	2	1	3	2	1	3	4	3	0
chr01_64397564	chr01	64397564	candidate_SNP:64397563-64397564	4	4	4	4	4	4	4	4	4	4	4	4	4	4	4	4	4	4	4	3	4	4	4	4	4	4	4	4	4	4	4	4	4	3	4	3	4	4	4	4	3	4	4	3	4	4
chr01_64463239	chr01	64463239	solcap_snp_c2_41335	3	1	3	3	2	4	4	3	4	4	3	4	4	2	2	3	4	4	2	2	4	2	4	4	2	3	4	2	4	1	3	4	4	4	4	4	4	3	4	3	3	3	2	2	4	4
chr01_64463293	chr01	64463293	solcap_snp_c2_41337	1	0	3	3	0	3	3	2	2	3	3	2	2	1	1	1	3	3	2	2	1	1	1	2	2	1	4	0	1	1	2	3	3	4	2	4	1	3	2	0	3	3	1	1	0	2
chr01_64463776	chr01	64463776	solcap_snp_c2_41339	4	3	4	3	2	4	4	4	2	3	4	4	3	4	3	3	4	4	3	4	2	3	3	3	3	3	4	3	2	4	4	3	4	4	3	3	3	4	4	4	4	4	3	4	3	4
chr01_64468279	chr01	64468279	solcap_snp_c1_12131	4	3	4	2	3	4	4	4	3	2	4	4	3	4	4	3	4	4	3	4	1	3	3	3	3	4	4	2	3	4	4	3	4	4	3	3	3	4	4	4	4	4	3	4	2	4
chr01_64478765	chr01	64478765	ST4.03ch01_62946365	4	4	4	4	4	4	4	4	4	4	4	4	4	4	4	4	4	3	4	4	4	4	4	4	4	3	4	4	4	4	4	4	4	4	4	4	4	4	4	4	4	4	4	4	4	4
chr01_64481592	chr01	64481592	candidate_SNP:64481591-64481592	4	3	4	3	3	4	4	4	2	4	4	4	2	4	3	3	4	4	3	4	2	3	2	3	3	1	4	2	3	4	4	3	4	4	3	3	3	4	4	4	4	4	3	4	3	4
chr01_64499372	chr01	64499372	PotVar0049203	4	4	4	4	4	4	4	4	4	4	4	4	4	4	4	4	4	3	4	4	4	4	4	4	4	3	4	4	4	4	4	4	4	4	4	4	4	4	4	4	4	4	4	4	4	4
chr01_64499472	chr01	64499472	PotVar0049199	2	0	0	0	1	1	0	0	1	0	0	1	1	1	0	0	1	0	0	0	1	0	2	1	0	0	2	0	1	0	0	0	1	0	1	0	0	0	1	2	0	0	0	1	2	0
chr01_64499526	chr01	64499526	PotVar0049198	4	4	4	4	4	4	3	4	4	4	4	4	4	3	3	4	4	4	4	4	4	4	4	4	4	4	4	4	4	3	3	4	4	4	4	4	3	4	4	4	4	4	4	4	3	3
chr01_64503554	chr01	64503554	PotVar0049079	3	3	2	1	2	2	0	2	0	1	1	2	2	2	1	1	1	1	2	2	1	2	2	1	2	2	2	2	2	2	2	1	1	1	1	0	2	2	1	4	1	1	1	3	2	0
chr01_64504340	chr01	64504340	PotVar0049037	3	4	4	4	3	3	4	3	4	4	4	2	3	3	4	4	3	4	4	4	3	4	3	2	4	4	2	4	4	4	4	3	2	4	2	4	3	4	3	3	4	4	4	3	3	4
chr01_64507183	chr01	64507183	candidate_SNP:64507182-64507183	2	1	0	1	2	1	1	1	2	1	0	1	2	1	2	1	1	0	1	0	2	1	2	2	1	1	2	2	2	1	1	2	2	0	1	1	2	0	2	2	0	0	1	1	4	1
chr01_64571992	chr01	64571992	candidate_SNP:64571991-64571992	4	3	3	3	3	3	2	3	4	2	2	4	4	3	3	3	4	3	4	3	4	3	4	4	3	3	4	1	3	1	2	4	4	3	4	4	3	3	4	2	3	3	3	3	2	3
chr01_64588775	chr01	64588775	candidate_SNP:64588774-64588775	3	4	4	4	3	3	4	3	4	4	4	3	3	2	4	4	2	4	4	4	2	4	2	3	4	4	2	4	3	4	4	3	3	4	3	4	3	4	3	2	4	4	4	3	2	4
chr01_64608306	chr01	64608306	ST4.03ch01_63056674	3	3	4	4	3	4	4	4	4	3	4	4	3	3	4	4	4	4	2	3	4	3	4	3	3	3	4	4	3	4	4	4	4	4	4	4	4	3	4	4	4	4	4	4	4	4
chr01_64608328	chr01	64608328	ST4.03ch01_63056696	2	0	3	1	1	1	0	1	2	1	2	2	2	1	1	1	4	1	0	2	1	0	3	2	1	0	4	0	2	1	1	2	3	2	2	3	1	2	4	2	1	2	1	2	2	1
chr01_64687983	chr01	64687983	candidate_SNP:64687982-64687983	4	4	4	4	3	4	4	4	4	4	4	3	4	4	4	4	4	4	4	4	4	4	4	4	4	4	4	3	4	4	4	4	4	4	4	4	3	4	4	4	4	4	4	4	4	4
chr01_64688780	chr01	64688780	candidate_SNP:64688779-64688780	1	4	4	4	4	3	4	2	4	4	4	3	3	3	4	4	4	4	4	4	4	4	2	4	4	4	2	4	4	4	4	4	3	4	3	4	2	4	4	3	4	4	4	3	3	4
chr01_64757721	chr01	64757721	solcap_snp_c2_32359	3	0	3	1	2	2	4	3	2	2	2	2	1	2	1	1	3	2	1	2	1	0	3	2	1	1	4	1	2	2	3	3	3	1	1	4	3	2	4	3	1	0	0	3	3	4
chr01_64765599	chr01	64765599	candidate_SNP:64765598-64765599	4	4	3	4	4	4	4	4	4	2	4	4	4	4	3	3	4	4	4	2	4	4	4	4	3	2	4	4	3	3	3	4	3	3	4	NA	3	3	3	4	4	4	4	4	4	2
chr01_64770386	chr01	64770386	candidate_SNP:64770385-64770386	1	4	4	4	2	1	2	1	2	3	3	4	2	3	4	4	2	4	3	4	2	4	2	2	4	4	1	3	4	4	4	0	3	4	3	4	3	4	3	2	4	4	4	2	3	2
chr01_64775153	chr01	64775153	candidate_SNP:64775152-64775153	3	1	3	1	2	3	4	3	4	1	1	2	3	1	2	3	3	2	2	2	3	1	4	2	2	2	4	3	2	1	2	4	3	2	3	4	3	1	4	3	1	1	1	2	4	4
chr01_64818003	chr01	64818003	solcap_snp_c2_32346	2	0	0	0	2	3	4	3	3	1	0	2	2	2	1	0	1	1	2	0	3	1	3	1	1	1	2	3	1	1	1	3	1	0	2	0	4	0	1	3	0	1	1	1	4	3
chr01_64863174	chr01	64863174	solcap_snp_c1_9667	4	4	4	4	4	4	4	4	2	4	4	4	3	4	3	4	4	4	3	4	3	3	3	4	3	4	4	2	4	4	4	2	4	4	3	4	3	4	4	4	4	3	3	4	3	4
chr01_64885263	chr01	64885263	solcap_snp_c1_9679	3	3	4	3	4	4	4	4	3	4	4	2	4	4	2	3	3	4	2	3	3	3	4	4	4	3	4	2	4	3	2	3	3	3	3	2	3	2	4	4	3	1	3	3	3	4
chr01_64920506	chr01	64920506	PotVar0049028	4	4	4	4	4	4	3	4	4	4	4	4	4	3	3	4	4	3	4	4	4	4	4	4	4	3	4	4	4	3	3	4	4	4	4	4	3	4	4	4	4	4	4	4	2	3
chr01_64920825	chr01	64920825	PotVar0049011	4	4	4	4	4	4	2	4	4	4	4	4	4	3	4	4	4	3	4	4	4	4	4	4	4	3	4	4	4	3	3	4	4	4	4	4	3	4	4	4	4	4	4	4	4	3
chr01_64969742	chr01	64969742	candidate_SNP:64969741-64969742	3	2	1	2	1	2	2	2	3	1	2	3	2	3	2	1	3	2	3	1	3	1	3	1	2	2	2	3	1	2	2	2	2	2	2	2	3	1	3	1	1	2	3	2	4	2
chr01_64983303	chr01	64983303	ST4.03ch01_63429410	4	4	4	4	4	4	3	4	4	4	4	4	3	3	3	4	4	4	4	4	4	4	4	4	4	4	4	4	3	3	3	4	4	4	4	4	3	4	3	4	4	4	3	4	3	3
chr01_64993552	chr01	64993552	candidate_SNP:64993551-64993552	4	4	4	4	4	4	3	4	4	4	4	4	4	3	4	4	4	4	4	4	4	4	4	4	4	4	4	4	4	3	3	4	4	4	4	4	3	4	4	4	4	4	4	4	3	3
chr01_64998828	chr01	64998828	ST4.03ch01_63440999	4	4	4	4	4	4	4	4	4	4	4	4	4	4	4	4	4	3	4	4	4	4	4	4	4	3	4	4	4	4	4	4	4	4	4	4	4	4	4	4	4	4	4	4	4	4
chr01_65026635	chr01	65026635	ST4.03ch01_63469262	4	4	4	4	4	4	3	4	4	4	4	4	4	3	4	4	4	3	4	4	4	4	4	4	4	2	4	4	4	3	3	4	4	4	4	4	4	4	4	4	4	4	4	4	4	4
chr01_65026998	chr01	65026998	solcap_snp_c1_9676	3	3	4	3	4	4	4	4	2	4	4	3	3	4	2	3	3	4	3	3	3	3	3	4	3	2	4	2	4	3	3	3	3	2	3	2	3	3	2	4	3	2	2	3	3	4
chr01_65046206	chr01	65046206	candidate_SNP:65046205-65046206	3	2	0	2	2	2	2	3	3	1	0	2	2	1	3	1	2	0	2	1	2	1	2	1	1	1	2	3	1	2	2	3	2	2	2	2	2	1	3	1	1	2	2	2	3	1
chr01_65182392	chr01	65182392	candidate_SNP:65182391-65182392	2	0	0	0	2	3	2	2	1	1	0	1	2	1	1	0	1	1	1	0	1	0	2	1	0	1	2	0	1	2	2	2	1	0	1	0	2	0	1	2	0	0	0	1	3	2
chr01_65219684	chr01	65219684	PotVar0126052	3	4	4	4	3	2	3	2	3	3	4	3	3	3	4	4	3	4	3	4	3	4	3	3	4	4	2	4	3	3	3	2	3	4	3	4	3	4	3	3	4	4	4	3	3	3
chr01_65219933	chr01	65219933	PotVar0126047	4	3	3	4	3	4	4	4	4	4	4	4	4	4	4	4	4	3	4	3	4	4	4	4	4	4	4	4	4	4	4	4	4	4	4	4	4	4	4	4	4	4	3	4	4	4
chr01_65220213	chr01	65220213	PotVar0126039	3	1	0	2	2	3	3	3	3	1	2	3	2	3	4	2	2	3	2	1	2	2	3	2	1	3	2	3	2	3	3	3	3	3	3	2	3	1	3	3	3	3	2	2	4	3
chr01_65248797	chr01	65248797	candidate_SNP:65248796-65248797	3	3	NA	3	3	3	3	4	3	1	2	3	2	4	4	4	3	3	3	4	3	2	4	3	2	4	3	3	2	4	3	4	3	4	4	2	4	3	3	3	4	3	3	3	4	4
chr01_65292784	chr01	65292784	candidate_SNP:65292783-65292784	4	4	4	4	4	4	4	4	4	4	4	4	4	4	3	4	4	4	4	4	4	4	4	4	4	4	4	4	4	4	4	4	3	4	4	4	4	4	4	4	4	4	4	4	3	4
chr01_65294282	chr01	65294282	PotVar0126035	3	2	2	2	3	3	3	3	3	2	2	3	3	3	3	3	2	2	2	2	3	3	3	2	2	3	3	2	3	3	2	3	2	3	3	3	3	2	3	2	2	2	3	3	3	3
chr01_65294397	chr01	65294397	PotVar0126029	4	4	4	4	4	4	3	4	4	4	4	4	4	3	3	4	4	4	4	4	4	4	4	4	4	4	4	4	4	3	3	4	4	4	4	4	3	4	3	4	4	4	4	4	4	3
chr01_65294409	chr01	65294409	PotVar0126028	2	2	2	2	3	3	2	4	3	2	3	3	3	3	2	3	4	2	3	2	3	3	4	4	3	3	3	3	2	1	2	3	4	3	3	2	1	2	4	3	3	3	3	2	4	1
chr01_65302284	chr01	65302284	solcap_snp_c2_40954	2	4	4	4	2	1	2	1	3	3	4	3	3	3	4	4	3	4	2	4	3	4	1	2	4	4	2	4	2	2	3	2	3	4	3	4	2	4	3	2	4	4	4	3	2	3
chr01_65334529	chr01	65334529	solcap_snp_c2_40956	3	4	4	4	4	4	4	4	2	4	3	2	3	4	0	4	2	4	3	3	3	3	2	4	3	4	4	1	4	2	2	3	3	3	2	4	3	3	1	4	4	2	3	4	2	4
chr01_65352795	chr01	65352795	candidate_SNP:65352794-65352795	2	4	4	4	3	2	2	0	2	4	4	3	3	3	4	4	2	4	3	4	2	4	2	2	4	4	1	4	2	2	4	3	3	4	3	4	2	4	2	3	4	4	4	3	3	3
chr01_65368178	chr01	65368178	solcap_snp_c2_40966	4	4	4	4	4	4	4	4	4	4	4	4	4	4	3	4	4	4	4	4	4	3	4	4	4	4	4	4	4	4	4	4	4	4	4	4	4	4	4	4	4	4	4	4	3	4
chr01_65373595	chr01	65373595	candidate_SNP:65373594-65373595	1	4	4	4	2	1	2	1	1	3	2	2	1	3	0	4	1	4	1	3	1	2	2	3	3	4	2	1	3	2	1	1	2	3	3	4	2	3	0	1	4	2	2	3	0	2
chr01_65377598	chr01	65377598	candidate_SNP:65377597-65377598	2	0	0	0	1	3	3	3	2	1	1	1	1	1	1	0	1	1	1	0	1	1	2	1	0	2	1	0	1	3	3	1	1	0	1	0	2	0	1	3	0	0	0	1	3	3
chr01_65423184	chr01	65423184	candidate_SNP:65423183-65423184	1	1	4	2	3	4	4	4	4	4	1	2	2	2	4	3	2	4	1	0	2	1	4	3	2	1	4	2	3	4	4	3	3	2	4	2	3	2	0	4	1	2	2	2	4	4
chr01_65424653	chr01	65424653	candidate_SNP:65424652-65424653	4	4	4	4	4	4	4	4	4	4	4	4	4	4	3	4	4	4	4	4	4	4	4	4	4	4	4	4	4	4	4	4	4	4	4	4	4	4	4	4	4	4	4	4	3	4
chr01_65519111	chr01	65519111	candidate_SNP:65519110-65519111	4	4	0	3	4	4	3	4	3	3	3	3	3	3	4	3	3	2	4	4	3	2	3	3	2	4	3	3	2	3	3	2	2	4	2	2	3	3	4	3	4	4	4	4	4	3
chr01_65548794	chr01	65548794	candidate_SNP:65548793-65548794	0	2	0	1	1	1	0	1	0	1	0	0	0	0	0	1	0	1	0	1	0	0	0	0	1	1	0	0	1	0	0	0	0	2	0	2	0	1	0	0	1	1	1	3	0	0
chr01_65576691	chr01	65576691	ST4.03ch01_64069788	3	4	4	4	2	4	4	4	4	3	4	4	4	3	4	4	4	4	4	3	4	4	4	4	4	4	4	4	4	4	4	3	3	3	4	4	4	4	3	4	4	4	3	4	4	4
chr01_65601212	chr01	65601212	solcap_snp_c2_46207	3	4	0	3	4	2	3	3	1	2	2	3	1	2	1	3	2	3	1	2	2	1	1	2	2	4	3	0	2	3	2	2	2	4	1	3	2	2	3	2	3	3	3	4	3	3
chr01_65606385	chr01	65606385	ST4.03ch01_64099726	2	4	2	2	2	2	2	2	2	2	2	2	2	2	2	2	2	2	2	2	2	2	2	2	2	2	2	2	2	2	2	2	2	2	2	3	2	2	2	2	2	2	2	3	2	2
chr01_65606542	chr01	65606542	ST4.03ch01_64099883	3	4	3	3	3	3	3	3	3	3	3	3	3	3	3	3	3	3	3	3	3	3	3	3	3	3	3	3	3	3	3	3	3	3	3	3	3	3	3	3	3	3	3	3	3	3
chr01_65626956	chr01	65626956	ST4.03ch01_64120297	1	4	4	3	3	2	1	2	4	3	2	1	2	2	3	4	3	2	1	2	3	2	2	3	4	2	3	4	3	2	1	3	2	3	3	4	2	4	2	1	3	4	4	3	2	2
chr01_65626965	chr01	65626965	ST4.03ch01_64120306	1	4	4	3	3	2	1	2	4	3	2	1	2	2	3	4	3	2	1	2	3	2	2	3	4	2	3	4	3	2	1	3	2	3	3	4	2	4	2	1	3	4	4	3	2	2
chr01_65627093	chr01	65627093	ST4.03ch01_64120434	2	4	4	4	3	3	4	3	4	4	3	2	4	2	3	4	2	4	3	3	3	3	4	4	4	3	3	4	4	2	4	3	2	4	4	4	3	4	3	4	3	3	3	3	2	3
chr01_65627547	chr01	65627547	solcap_snp_c1_13686	2	4	4	4	3	2	2	1	3	2	3	2	3	4	4	4	4	2	2	4	3	3	2	3	4	3	2	4	3	2	1	3	3	4	3	3	3	4	3	1	4	4	4	3	2	2
chr01_65721567	chr01	65721567	candidate_SNP:65721566-65721567	4	4	4	4	4	4	4	4	4	4	4	4	4	4	3	4	4	4	4	4	4	4	4	4	4	4	4	4	4	4	4	4	4	4	4	4	4	4	4	4	4	4	4	4	2	4
chr01_65723673	chr01	65723673	ST4.03ch01_64228881	2	4	4	4	3	1	2	2	3	3	3	2	3	4	4	4	4	3	3	4	3	3	2	3	4	3	2	4	3	1	2	3	3	4	3	4	3	4	3	2	4	4	4	3	2	2
chr01_65724780	chr01	65724780	candidate_SNP:65724779-65724780	0	4	4	4	1	1	1	1	2	1	3	2	1	2	3	4	2	2	1	2	2	2	2	3	4	3	2	4	2	2	1	2	1	3	3	4	3	4	0	2	2	4	2	3	1	1
chr01_65741592	chr01	65741592	candidate_SNP:65741591-65741592	3	4	4	4	2	4	4	4	4	3	4	4	4	3	4	4	4	4	4	3	4	4	4	4	4	4	4	4	4	4	4	3	3	3	4	4	4	4	2	4	3	4	3	4	4	4
chr01_65751996	chr01	65751996	candidate_SNP:65751995-65751996	0	4	4	4	1	1	2	1	3	2	2	2	2	1	4	4	2	3	1	1	3	2	2	3	4	2	2	4	3	1	1	2	2	3	3	4	2	4	1	1	3	4	3	3	1	1
chr01_65753846	chr01	65753846	solcap_snp_c2_46195	0	4	4	3	1	0	0	1	2	2	1	2	3	1	3	3	3	1	0	1	2	1	1	2	4	2	3	4	2	1	1	2	1	2	2	4	1	4	1	1	3	3	4	2	0	2
chr01_65803195	chr01	65803195	candidate_SNP:65803194-65803195	1	2	4	2	1	4	3	4	4	3	3	4	4	1	4	1	4	3	2	0	3	2	4	1	2	1	4	4	2	3	3	2	1	2	4	3	3	4	1	3	3	2	3	1	4	3
chr01_65806926	chr01	65806926	candidate_SNP:65806925-65806926	4	4	4	4	4	4	3	4	4	4	4	4	4	3	4	4	4	4	4	3	4	4	4	4	4	4	4	4	4	3	3	4	4	4	4	4	3	4	4	4	4	4	4	4	4	3
chr01_65819186	chr01	65819186	candidate_SNP:65819185-65819186	4	4	4	3	4	4	4	4	4	4	2	4	4	4	4	3	4	3	4	4	2	4	4	3	4	3	4	4	4	4	4	4	4	2	4	4	4	4	4	4	3	3	4	4	4	4
chr01_65821573	chr01	65821573	candidate_SNP:65821572-65821573	4	2	4	3	3	3	1	3	1	4	3	3	3	3	1	3	3	4	2	4	2	2	3	4	2	4	4	0	3	2	2	2	3	2	2	4	3	4	3	3	2	3	3	4	2	4
chr01_65828797	chr01	65828797	candidate_SNP:65828796-65828797	3	1	4	2	2	4	4	4	4	4	3	4	4	1	4	2	4	3	3	0	4	3	4	1	2	1	4	4	3	4	4	3	4	1	4	1	3	2	4	4	3	2	3	1	4	4
chr01_65842339	chr01	65842339	candidate_SNP:65842338-65842339	4	0	0	0	NA	3	4	3	1	1	0	4	1	4	1	0	1	1	4	0	3	1	2	2	0	1	2	1	0	4	4	0	3	0	2	0	3	0	2	4	0	0	0	1	3	3
chr01_65845596	chr01	65845596	candidate_SNP:65845595-65845596	4	4	0	3	4	3	4	3	3	2	3	4	3	4	4	2	3	3	4	4	4	4	3	3	3	4	2	4	3	4	4	3	3	4	3	1	4	2	4	4	4	4	4	4	4	3
chr01_65852614	chr01	65852614	ST4.03ch01_64359674	3	4	4	4	0	2	1	2	3	3	3	3	4	2	3	4	3	4	2	2	3	2	4	4	4	4	4	2	4	1	2	2	2	3	3	4	3	3	2	2	3	3	2	4	4	3
chr01_65855154	chr01	65855154	candidate_SNP:65855153-65855154	4	4	4	4	2	2	2	1	2	4	4	3	4	3	4	4	4	4	3	4	3	2	4	4	4	4	4	2	4	2	2	2	1	4	2	4	3	4	4	3	4	4	2	4	4	3
chr01_65869302	chr01	65869302	ST4.03ch01_64376848	4	4	4	4	4	3	1	3	3	4	4	2	4	2	4	4	4	4	4	4	3	3	4	4	4	4	4	3	4	3	2	4	3	4	3	4	3	4	4	3	4	4	3	4	4	4
chr01_66001588	chr01	66001588	candidate_SNP:66001587-66001588	1	1	4	3	2	1	3	1	4	2	4	3	3	4	4	3	3	2	3	4	3	4	2	2	2	1	2	4	3	4	4	3	2	3	3	2	2	2	2	3	4	3	3	2	1	3
chr01_66012790	chr01	66012790	candidate_SNP:66012789-66012790	3	4	4	3	4	4	3	4	4	4	3	4	3	2	4	3	4	3	3	1	3	4	4	3	4	3	4	4	4	3	2	4	4	2	4	4	3	4	4	4	3	3	4	4	4	3
chr01_66015192	chr01	66015192	candidate_SNP:66015191-66015192	3	4	4	4	4	4	4	4	4	4	4	4	3	3	4	4	4	4	2	3	4	3	4	4	4	4	4	4	4	4	4	4	4	4	4	4	4	4	4	4	4	4	4	4	4	4
chr01_66087171	chr01	66087171	candidate_SNP:66087170-66087171	2	3	0	1	0	1	0	1	0	2	0	2	1	0	1	1	1	2	0	0	1	0	2	2	1	3	2	1	2	0	0	0	1	1	1	1	1	1	2	2	0	0	0	2	2	0
chr01_66099873	chr01	66099873	ST4.03ch01_64607440	2	0	4	3	4	4	4	3	2	3	3	2	2	4	1	3	1	2	3	4	2	3	1	2	3	2	3	1	1	4	4	4	4	2	3	3	2	2	1	1	2	3	4	2	0	4
chr01_66103304	chr01	66103304	PotVar0033086	3	3	0	1	0	1	1	1	1	1	0	3	1	2	2	1	2	2	0	0	2	1	2	2	1	3	2	3	2	1	2	0	2	2	2	2	2	3	1	3	1	1	2	2	2	0
chr01_66107999	chr01	66107999	candidate_SNP:66107998-66107999	4	4	1	3	2	1	2	1	2	2	2	3	3	4	4	2	3	2	3	4	4	4	3	4	2	4	2	4	3	3	3	2	4	4	3	2	3	3	4	4	4	3	2	3	4	2
chr01_66158011	chr01	66158011	ST4.03ch01_64666233	4	4	4	4	4	4	3	4	4	4	4	4	4	3	4	4	4	4	4	3	4	4	4	4	4	4	4	4	4	3	3	4	4	4	4	4	3	4	4	4	4	4	4	4	4	3
chr01_66159413	chr01	66159413	ST4.03ch01_64667635	4	4	1	3	4	3	3	3	2	3	3	4	2	4	3	3	2	3	4	4	4	4	4	3	2	4	2	4	3	3	3	3	3	4	3	3	4	3	4	4	4	3	3	3	4	3
chr01_66205595	chr01	66205595	candidate_SNP:66205594-66205595	2	4	4	3	4	4	3	4	4	4	3	4	3	2	4	3	4	3	2	2	3	3	4	3	4	4	4	4	4	3	3	4	4	3	4	4	3	4	4	4	2	2	4	4	4	3
chr01_66212765	chr01	66212765	candidate_SNP:66212764-66212765	2	4	4	3	4	2	3	4	4	3	3	2	3	3	3	3	4	3	4	2	3	4	3	2	4	4	2	4	2	3	3	4	4	3	4	4	2	4	3	3	3	3	4	3	2	4
chr01_66270328	chr01	66270328	candidate_SNP:66270327-66270328	4	4	4	3	4	4	4	4	4	4	4	4	4	4	4	3	4	3	4	4	3	4	4	3	4	3	4	4	4	4	4	4	4	3	4	4	4	4	4	4	3	3	4	4	4	4
chr01_66274363	chr01	66274363	candidate_SNP:66274362-66274363	3	4	3	2	1	4	3	4	3	2	2	4	1	1	4	2	3	2	1	0	3	2	4	3	1	3	2	4	3	4	2	1	3	4	3	3	3	4	2	4	3	2	3	4	4	2
chr01_66298485	chr01	66298485	ST4.03ch01_64808644	2	4	4	4	1	4	3	4	4	2	3	4	3	1	4	4	4	4	3	0	4	2	4	4	4	4	2	4	4	2	2	3	2	4	4	4	3	4	2	2	4	4	4	4	4	2
chr01_66334311	chr01	66334311	candidate_SNP:66334310-66334311	4	1	4	3	3	2	2	2	4	3	4	3	4	3	3	3	3	3	3	4	2	2	4	3	3	3	3	2	4	3	3	2	2	2	2	2	3	1	4	3	3	3	3	3	3	3
chr01_66406388	chr01	66406388	candidate_SNP:66406387-66406388	2	0	0	2	4	4	4	4	2	3	2	2	1	4	2	2	1	3	3	4	3	2	1	3	0	4	2	0	1	4	4	1	2	3	0	0	3	0	2	3	2	2	0	4	2	4
chr01_66431858	chr01	66431858	ST4.03ch01_64945965	3	3	3	3	4	4	3	4	2	4	3	3	3	3	2	3	4	4	3	3	3	3	3	4	2	4	4	2	1	3	3	3	4	2	2	4	2	4	2	3	2	2	3	4	3	3
chr01_66432455	chr01	66432455	ST4.03ch01_64946562	1	0	3	1	3	1	2	3	2	2	1	0	2	2	1	1	2	3	0	2	0	0	1	1	1	1	4	0	1	2	1	2	2	0	1	1	0	2	2	0	0	0	1	0	0	1
chr01_66438352	chr01	66438352	candidate_SNP:66438351-66438352	4	4	2	2	4	4	3	4	4	4	2	4	3	3	3	3	3	2	4	3	3	4	3	2	4	3	2	4	3	3	3	3	3	3	3	3	3	2	4	4	3	3	3	4	4	2
chr01_66473271	chr01	66473271	ST4.03ch01_64988879	4	4	4	4	4	4	4	4	4	4	3	4	4	4	4	4	4	4	4	4	4	3	4	4	4	4	4	4	4	3	3	4	4	4	4	4	4	4	4	3	4	4	4	4	4	3
chr01_66475186	chr01	66475186	candidate_SNP:66475185-66475186	4	4	4	4	4	4	4	4	4	4	4	4	4	3	4	4	4	4	4	3	4	4	4	4	4	4	4	4	4	4	3	4	4	4	4	4	4	4	4	4	4	4	4	4	4	3
chr01_66483968	chr01	66483968	candidate_SNP:66483967-66483968	3	4	4	3	4	4	3	4	4	4	2	4	3	2	4	3	4	3	2	2	3	2	4	3	4	3	4	4	4	2	2	4	4	3	4	4	3	4	4	3	3	4	4	4	4	2
chr01_66492390	chr01	66492390	candidate_SNP:66492389-66492390	2	4	4	4	1	4	4	4	4	3	4	4	4	3	4	4	4	4	4	2	4	4	4	4	4	4	2	4	4	4	4	4	3	4	4	4	4	4	2	4	4	4	4	4	4	4
chr01_66494350	chr01	66494350	candidate_SNP:66494349-66494350	1	3	1	1	3	1	2	1	2	1	0	2	0	2	0	1	0	1	0	2	2	1	0	1	1	2	2	2	1	2	2	1	3	2	1	2	1	1	2	1	1	0	1	2	1	0
chr01_66508751	chr01	66508751	candidate_SNP:66508750-66508751	3	4	3	3	2	4	1	3	3	3	3	4	3	1	4	4	3	3	4	2	4	4	4	4	4	3	4	3	3	3	2	4	3	3	3	4	2	4	3	4	4	4	3	4	3	2
chr01_66517596	chr01	66517596	candidate_SNP:66517595-66517596	3	4	4	4	4	4	3	4	4	4	3	4	4	3	4	4	4	4	2	3	4	3	4	4	4	4	4	4	4	3	4	4	4	4	4	4	4	4	4	4	4	4	4	4	4	4
chr01_66564795	chr01	66564795	candidate_SNP:66564794-66564795	4	4	4	4	4	4	4	4	4	4	3	4	4	3	4	4	4	4	2	4	4	4	4	4	4	4	4	4	4	3	4	4	4	4	4	4	4	4	4	3	4	4	4	4	4	4
chr01_66575988	chr01	66575988	candidate_SNP:66575987-66575988	3	4	4	4	4	4	4	4	4	4	2	3	4	4	3	4	3	4	4	4	4	3	3	4	4	4	4	2	4	3	3	4	4	4	3	4	3	4	3	2	3	3	4	4	3	3
chr01_66607196	chr01	66607196	candidate_SNP:66607195-66607196	3	4	4	4	1	4	4	4	4	3	4	4	4	3	4	4	4	4	4	3	4	4	4	4	4	4	2	4	4	4	4	4	3	4	4	4	4	4	1	4	4	4	4	4	4	4
chr01_66642637	chr01	66642637	ST4.03ch01_65158741	1	4	4	3	3	1	3	1	3	1	1	1	2	2	2	3	1	2	2	2	3	2	2	2	3	2	4	2	3	3	2	3	4	3	3	4	1	3	2	2	2	3	4	2	1	1
chr01_66647546	chr01	66647546	candidate_SNP:66647545-66647546	0	3	4	2	3	3	2	3	1	1	1	1	3	1	2	2	1	1	1	0	1	2	2	1	2	1	4	2	2	1	1	2	3	1	2	3	1	4	0	1	1	2	3	3	1	2
chr01_66739445	chr01	66739445	ST4.03ch01_65256847	3	4	4	4	2	4	4	4	4	2	4	4	4	3	4	4	4	4	4	2	4	4	4	4	4	4	3	4	4	4	4	4	3	4	4	4	4	4	3	4	4	4	4	4	4	4
chr01_66749595	chr01	66749595	candidate_SNP:66749594-66749595	2	4	4	3	4	3	4	3	3	2	3	3	4	4	3	3	1	2	4	4	3	3	3	2	2	2	4	3	4	3	3	4	4	3	4	4	3	4	3	2	2	2	4	3	2	3
chr01_66752649	chr01	66752649	solcap_snp_c2_13653	2	1	4	3	4	4	3	4	1	2	3	1	3	2	2	2	2	2	3	4	2	2	2	4	2	2	4	1	3	3	4	2	2	2	1	3	2	4	2	2	2	2	1	1	1	4
chr01_66757577	chr01	66757577	candidate_SNP:66757576-66757577	3	4	4	4	4	4	4	4	4	4	4	4	3	3	4	4	4	4	3	3	4	3	4	4	4	4	4	4	4	4	4	4	4	4	4	4	4	4	4	4	4	4	4	4	4	4
chr01_66784794	chr01	66784794	candidate_SNP:66784793-66784794	3	4	4	4	4	4	3	4	4	4	4	4	3	2	4	4	4	4	2	2	4	3	4	4	4	4	4	4	4	3	3	4	4	4	4	4	3	4	4	4	4	4	4	4	4	3
chr01_66789595	chr01	66789595	candidate_SNP:66789594-66789595	4	4	4	4	4	4	4	4	4	4	4	4	4	4	4	4	4	4	4	4	4	4	4	4	4	4	4	4	4	4	4	4	4	4	4	4	4	4	4	4	4	4	4	4	4	4
chr01_66849588	chr01	66849588	candidate_SNP:66849587-66849588	4	4	4	4	4	4	3	4	4	4	4	4	4	3	4	4	4	4	4	3	4	4	4	4	4	4	4	4	4	3	3	4	4	4	4	4	3	4	4	4	4	4	4	4	4	3
chr01_66863191	chr01	66863191	candidate_SNP:66863190-66863191	3	0	3	1	4	2	1	2	1	3	2	1	1	1	2	1	3	2	2	3	0	0	2	1	1	1	4	2	2	0	0	2	3	0	2	2	1	2	4	1	1	2	1	1	1	3
chr01_66903993	chr01	66903993	candidate_SNP:66903992-66903993	3	4	4	4	4	4	4	4	4	4	2	4	3	3	4	3	4	4	3	3	3	3	4	4	4	4	4	4	4	3	3	4	4	3	4	4	3	4	4	4	4	4	4	4	4	2
chr01_66912837	chr01	66912837	ST4.03ch01_65435082	3	2	4	2	1	4	3	4	2	3	4	3	3	2	3	2	4	3	3	0	2	1	3	4	2	3	2	3	4	2	2	2	4	1	3	2	1	4	2	3	2	3	1	2	3	3
chr01_66912864	chr01	66912864	ST4.03ch01_65435109	2	0	0	0	1	2	2	1	1	1	2	1	0	0	1	0	2	1	1	0	0	0	2	0	1	1	0	2	0	1	1	1	0	0	1	0	1	1	2	2	1	1	0	0	1	1
chr01_66937947	chr01	66937947	ST4.03ch01_65459997	4	4	4	4	4	4	4	4	4	4	4	4	4	4	4	4	4	4	4	4	4	4	4	4	4	4	4	4	4	4	4	4	4	4	4	4	4	4	4	4	4	4	4	3	4	4
chr01_66948577	chr01	66948577	ST4.03ch01_65470627	4	4	4	4	4	4	3	4	4	4	3	4	3	2	4	3	4	3	2	3	2	3	4	3	4	3	4	4	4	3	3	4	4	3	4	4	3	4	4	4	3	4	4	3	4	4
chr01_66948976	chr01	66948976	ST4.03ch01_65471026	4	4	2	4	4	2	3	2	4	4	4	2	3	4	4	4	3	4	4	4	4	2	1	3	3	4	4	3	1	1	2	4	4	4	4	4	4	3	4	2	4	4	4	3	1	3
chr01_66950728	chr01	66950728	solcap_snp_c1_4744	2	0	3	1	1	1	0	2	1	1	2	2	1	0	2	1	3	2	2	0	0	0	1	1	1	1	2	1	0	0	0	2	2	0	1	2	2	2	2	1	2	2	0	0	1	2
chr01_66956796	chr01	66956796	candidate_SNP:66956795-66956796	4	4	4	4	4	4	3	4	4	4	4	4	4	3	4	4	4	4	4	3	4	4	4	4	4	4	4	4	4	3	3	4	4	4	4	4	3	4	4	4	4	4	4	4	4	3
chr01_66991986	chr01	66991986	candidate_SNP:66991985-66991986	3	2	3	3	4	3	4	3	4	3	4	3	3	4	3	3	3	3	4	4	3	4	3	3	3	3	4	3	2	4	4	4	3	3	4	3	3	3	4	3	4	3	3	2	2	4
chr01_67024122	chr01	67024122	ST4.03ch01_65547834	4	3	4	2	3	0	2	1	2	3	4	3	3	3	3	3	4	4	2	4	2	2	2	4	3	4	4	3	3	3	2	1	4	2	2	4	3	3	4	2	2	4	2	4	4	3
chr01_67049566	chr01	67049566	candidate_SNP:67049565-67049566	4	4	4	4	4	4	4	4	4	4	4	4	4	4	4	4	4	4	4	4	4	4	4	4	4	4	4	4	4	4	4	4	4	4	4	4	4	4	4	4	4	4	4	3	4	4
chr01_67056797	chr01	67056797	candidate_SNP:67056796-67056797	3	4	4	4	4	3	4	3	4	2	4	3	3	4	3	4	2	4	4	4	4	4	3	3	4	4	4	4	2	4	4	4	4	4	4	4	3	4	4	3	4	3	4	3	2	4
chr01_67062397	chr01	67062397	candidate_SNP:67062396-67062397	4	4	4	4	4	4	3	4	4	4	4	4	4	3	4	4	4	4	4	2	4	4	4	4	4	4	4	4	4	3	3	4	4	4	4	4	3	4	4	4	4	4	4	3	4	4
chr01_67087996	chr01	67087996	candidate_SNP:67087995-67087996	NA	4	4	3	3	2	2	2	4	3	3	4	4	4	4	3	4	3	2	4	3	4	4	2	4	4	4	4	4	4	4	3	4	3	4	4	4	3	4	4	3	4	4	4	4	3
chr01_67116716	chr01	67116716	candidate_SNP:67116715-67116716	2	4	1	3	0	0	2	0	3	2	3	2	2	4	4	3	3	3	3	4	4	4	4	2	4	4	0	4	3	3	2	1	3	4	4	2	4	2	4	2	4	3	2	3	3	2
chr01_67130331	chr01	67130331	candidate_SNP:67130330-67130331	4	4	4	4	4	4	3	4	4	4	4	4	4	3	4	4	4	4	4	4	4	4	4	4	4	4	4	4	4	3	3	4	4	4	4	4	4	4	4	4	4	4	4	4	4	3
chr01_67161667	chr01	67161667	PotVar0033183	3	4	4	4	4	3	4	3	4	3	4	3	3	4	4	4	3	4	4	4	4	4	3	3	4	4	4	4	3	4	4	4	4	4	4	4	3	4	4	3	4	3	4	3	3	4
chr01_67162120	chr01	67162120	PotVar0033208	1	0	0	1	0	0	0	0	1	1	1	1	0	0	1	1	2	2	0	0	1	0	1	1	1	2	0	2	0	0	0	0	1	1	1	0	0	0	2	1	1	2	0	1	1	0
chr01_67162471	chr01	67162471	PotVar0033227	4	4	4	4	4	2	4	4	4	4	4	4	4	4	4	4	3	4	4	4	4	4	3	3	4	4	4	4	3	4	4	4	4	4	4	4	3	4	4	3	4	3	4	2	3	4
chr01_67165913	chr01	67165913	PotVar0033293	4	4	4	4	4	4	3	4	4	4	4	4	4	3	3	4	4	4	4	3	4	4	4	4	4	4	4	4	4	3	3	4	4	4	4	4	3	4	4	4	4	4	4	4	3	3
chr01_67167809	chr01	67167809	PotVar0033341	4	4	4	4	4	4	3	4	4	4	4	4	4	4	4	4	4	4	4	3	4	4	4	4	4	4	4	4	4	3	3	4	4	4	4	4	3	4	4	4	4	4	4	4	4	3
chr01_67168193	chr01	67168193	solcap_snp_c2_14467	4	2	3	2	3	2	3	2	2	3	4	3	3	3	3	2	4	4	3	4	2	3	3	3	2	3	4	3	2	3	3	2	4	2	2	2	2	2	4	3	1	4	2	4	4	3
chr01_67168240	chr01	67168240	solcap_snp_c2_14468	4	2	3	2	3	2	3	2	2	3	4	3	3	3	3	2	4	4	3	4	2	3	3	3	2	3	4	3	2	3	3	2	4	2	2	2	2	2	4	3	1	4	2	4	4	3
chr01_67182947	chr01	67182947	PotVar0033584	0	0	0	1	0	1	0	0	1	1	1	0	0	0	0	2	1	2	0	0	1	0	0	1	1	1	0	0	0	0	0	0	0	1	0	0	0	0	NA	0	1	1	0	1	0	0
chr01_67184716	chr01	67184716	PotVar0033691	2	4	4	4	4	4	2	4	4	4	4	4	3	2	2	4	4	4	2	0	4	3	4	4	4	4	4	4	4	2	3	4	4	4	4	4	3	4	4	4	4	4	4	3	2	3
chr01_67186356	chr01	67186356	PotVar0033735	3	0	0	3	4	4	3	4	4	4	2	4	2	2	2	3	3	2	2	3	2	0	2	3	4	3	2	4	3	2	2	2	2	2	2	1	3	2	4	3	4	3	1	2	2	1
chr01_67208804	chr01	67208804	ST4.03ch01_65740915	3	4	4	4	4	3	4	3	4	3	4	3	3	4	4	4	3	4	4	4	4	4	3	3	4	4	4	4	3	4	4	4	4	4	4	4	3	4	4	3	4	3	4	3	3	4
chr01_67208902	chr01	67208902	ST4.03ch01_65741013	3	4	4	4	4	3	4	3	4	3	4	3	3	4	4	4	3	4	4	4	4	4	3	3	4	4	4	4	3	4	4	4	4	4	4	4	3	4	4	3	4	3	4	3	3	4
chr01_67208938	chr01	67208938	solcap_snp_c2_14474	0	0	0	1	0	0	0	0	1	1	1	0	0	0	0	1	1	1	0	0	1	0	0	1	2	2	0	0	0	0	0	0	0	1	0	0	0	0	0	0	1	1	0	1	0	0
chr01_67223835	chr01	67223835	ST4.03ch01_65757358	3	2	3	3	3	0	1	0	2	3	4	1	2	3	3	3	3	4	2	4	2	3	2	2	3	3	4	2	1	2	2	1	4	2	2	3	2	3	4	2	2	3	2	3	3	3
chr01_67243899	chr01	67243899	candidate_SNP:67243898-67243899	4	4	4	4	4	4	3	4	4	4	4	4	4	3	4	4	4	4	4	3	4	4	4	4	4	4	4	4	4	3	3	4	4	4	4	4	2	4	4	4	4	4	4	4	4	3
chr01_67245941	chr01	67245941	solcap_snp_c1_4706	3	2	2	3	2	4	3	4	2	3	4	2	3	2	4	2	4	4	3	2	2	3	3	3	4	3	2	2	1	3	3	2	3	3	2	3	2	4	1	3	1	4	2	4	4	4
chr01_67248400	chr01	67248400	solcap_snp_c2_14491	3	2	1	3	3	2	2	1	4	3	2	3	3	4	2	3	2	2	2	4	3	3	2	3	3	3	2	2	3	3	3	3	2	3	3	1	4	0	2	2	4	3	2	3	2	1
chr01_67248949	chr01	67248949	solcap_snp_c2_14493	3	3	3	2	4	4	3	3	3	4	4	3	3	3	3	3	4	4	3	3	3	3	3	4	3	3	4	3	3	3	3	3	4	3	3	3	3	4	4	3	2	4	3	4	4	4
chr01_67249152	chr01	67249152	solcap_snp_c2_14495	3	3	2	3	4	4	4	4	3	3	2	3	3	4	3	3	3	2	4	4	3	3	3	3	2	3	3	3	3	3	3	4	2	3	3	3	4	3	3	3	3	3	3	3	3	3
chr01_67271367	chr01	67271367	PotVar0033883	0	2	1	2	0	0	1	0	2	0	0	2	1	1	1	2	0	0	1	0	2	2	1	1	1	1	0	2	3	1	1	2	0	2	2	1	2	0	0	1	3	0	2	0	0	0
chr01_67272132	chr01	67272132	PotVar0033907	4	1	1	2	4	4	4	4	2	0	0	2	3	4	0	2	1	0	4	3	3	4	3	3	0	NA	3	2	0	3	3	0	2	0	1	3	4	0	3	1	3	0	1	0	3	0
chr01_67359930	chr01	67359930	candidate_SNP:67359929-67359930	4	4	4	4	4	4	4	4	4	4	4	4	4	4	3	4	4	4	4	4	4	4	4	4	4	4	4	4	4	4	4	4	4	4	4	4	4	4	4	4	4	4	4	4	4	4
chr01_67362388	chr01	67362388	candidate_SNP:67362387-67362388	1	4	4	3	4	4	2	3	2	2	2	4	2	3	3	3	2	3	3	2	3	3	2	2	3	2	4	3	3	2	3	4	4	3	4	4	2	4	2	1	3	2	4	1	0	2
chr01_67386376	chr01	67386376	candidate_SNP:67386375-67386376	4	4	4	4	4	4	3	4	4	4	4	4	4	3	4	4	4	4	4	3	4	4	4	4	4	4	4	4	4	3	3	4	4	4	4	4	3	4	4	4	4	4	4	3	4	3
chr01_67394583	chr01	67394583	ST4.03ch01_65931241	3	4	4	3	4	4	3	4	4	4	3	4	3	1	3	3	4	3	2	2	3	2	4	3	4	2	4	4	4	2	2	4	4	3	4	4	3	4	4	3	3	4	4	3	2	2
chr01_67395993	chr01	67395993	candidate_SNP:67395992-67395993	4	4	4	4	4	4	4	4	4	3	4	4	4	4	4	4	3	3	4	4	4	4	4	4	3	4	4	4	4	4	4	4	4	4	4	4	4	4	4	4	4	4	4	3	4	4
chr01_67420777	chr01	67420777	candidate_SNP:67420776-67420777	4	2	2	3	4	4	4	4	4	4	3	4	3	4	3	3	3	2	4	4	3	4	3	2	3	3	2	4	3	4	4	3	2	4	3	2	4	1	4	4	4	2	2	3	3	3
chr01_67459347	chr01	67459347	solcap_snp_c2_14517	3	1	1	2	4	4	3	4	3	3	3	4	2	2	2	3	2	2	2	3	3	3	3	2	2	2	2	2	2	3	3	3	2	4	3	1	2	2	4	4	4	1	3	2	2	2
chr01_67470652	chr01	67470652	ST4.03ch01_66010116	4	4	4	3	2	3	4	3	4	2	3	4	4	3	4	3	4	3	4	1	4	4	4	3	4	3	2	4	4	4	4	4	4	2	4	4	4	4	4	4	2	4	4	2	4	4
chr01_67474435	chr01	67474435	ST4.03ch01_66013899	4	4	4	4	4	4	3	4	4	4	4	4	3	3	3	4	4	4	2	4	4	3	4	4	4	4	4	4	4	3	4	4	4	4	4	4	4	4	4	4	4	4	4	4	3	3
chr01_67485940	chr01	67485940	ST4.03ch01_66025409	4	4	2	4	4	4	4	4	1	2	3	4	4	4	4	4	2	1	4	4	3	4	4	4	0	1	2	4	4	4	4	3	3	4	3	0	4	2	4	4	4	1	3	1	3	3
chr01_67495996	chr01	67495996	candidate_SNP:67495995-67495996	3	4	4	4	4	3	3	3	3	3	4	3	3	4	4	4	3	4	4	3	4	4	3	4	4	4	4	4	3	3	3	4	3	4	4	4	3	4	3	3	4	4	4	4	4	4
chr01_67517588	chr01	67517588	candidate_SNP:67517587-67517588	3	1	1	2	3	2	2	2	3	3	2	4	1	0	2	1	3	1	2	1	1	1	3	0	1	0	0	3	3	2	3	3	2	1	1	0	3	1	4	4	2	1	1	1	1	3
chr01_67530397	chr01	67530397	candidate_SNP:67530396-67530397	2	1	1	1	2	2	2	2	2	1	2	3	2	0	2	1	2	0	1	1	2	2	3	0	1	0	0	2	2	2	2	2	2	2	2	0	1	1	3	3	2	1	1	1	0	2
chr01_67534006	chr01	67534006	ST4.03ch01_66074604	4	2	1	3	2	3	4	3	4	3	3	4	3	3	3	2	2	1	4	2	2	4	3	2	3	1	0	4	4	4	4	4	3	2	3	0	4	2	4	4	1	1	2	1	1	4
chr01_67552198	chr01	67552198	solcap_snp_c1_4745	4	2	2	3	4	4	4	4	4	4	3	4	2	2	3	2	3	2	4	4	3	3	3	1	3	3	2	3	2	4	4	2	2	4	2	1	2	1	4	4	4	3	1	3	2	2
chr01_67561590	chr01	67561590	candidate_SNP:67561589-67561590	4	4	4	3	4	4	4	4	4	4	3	4	4	4	3	3	4	3	4	4	3	4	4	3	4	2	4	4	4	4	4	4	4	3	4	4	4	4	4	4	2	3	4	3	3	4
chr01_67562394	chr01	67562394	candidate_SNP:67562393-67562394	4	4	4	3	4	4	4	4	4	4	3	4	4	4	4	3	4	3	4	4	3	4	4	3	4	3	4	4	4	4	4	4	4	3	4	4	4	4	4	4	2	3	4	4	4	4
chr01_67586121	chr01	67586121	ST4.03ch01_66128418	3	4	4	3	2	2	3	1	3	1	3	4	3	1	3	3	2	3	1	2	2	3	4	3	3	2	2	4	4	3	3	3	4	2	4	4	3	3	4	4	2	3	4	2	1	2
chr01_67614060	chr01	67614060	solcap_snp_c2_14580	3	4	4	4	2	4	4	4	4	4	3	4	4	4	3	4	3	4	4	4	4	4	4	4	4	4	3	3	4	4	4	4	3	4	3	4	4	4	3	3	4	4	4	4	4	3
chr01_67621314	chr01	67621314	ST4.03ch01_66226190	4	1	1	1	4	4	4	4	4	4	4	4	4	4	2	3	3	2	4	4	2	3	3	0	4	1	2	3	3	4	4	0	4	4	2	0	3	1	4	4	4	3	1	2	1	4
chr01_67637445	chr01	67637445	ST4.03ch01_66243009	3	2	3	2	1	1	1	2	1	2	4	3	2	0	2	1	3	3	0	1	3	2	3	3	1	3	2	2	1	2	2	2	4	1	1	3	1	3	4	2	2	3	3	2	1	2
chr01_67653820	chr01	67653820	solcap_snp_c1_4748	4	4	1	3	3	1	3	1	1	2	4	3	4	3	2	4	4	4	2	4	0	2	3	4	0	4	2	4	1	2	0	3	4	2	4	4	3	4	4	3	4	4	3	4	3	2
chr01_67669572	chr01	67669572	candidate_SNP:67669571-67669572	4	4	4	4	4	4	4	4	4	4	4	4	4	4	3	4	4	4	4	4	4	4	4	4	4	4	4	4	4	4	4	4	4	4	4	4	4	4	4	4	4	4	4	4	3	4
chr01_67672124	chr01	67672124	ST4.03ch01_66277934	3	4	4	4	4	4	3	4	4	4	4	4	3	2	4	4	4	4	2	3	4	3	4	4	4	4	4	4	4	3	3	4	4	4	4	4	3	4	4	4	4	4	4	3	4	3
chr01_67730513	chr01	67730513	solcap_snp_c1_4752	4	3	3	3	1	0	1	0	0	1	3	2	3	3	3	3	3	3	2	2	2	2	3	4	1	3	2	2	3	1	1	2	4	2	3	4	3	3	4	2	3	3	3	2	3	2
chr01_67731967	chr01	67731967	candidate_SNP:67731966-67731967	4	2	1	3	4	4	4	4	4	4	3	4	3	4	4	3	3	2	4	4	3	4	4	2	3	3	2	4	4	4	4	3	2	4	3	1	4	1	4	4	4	2	2	3	1	3
chr01_67743266	chr01	67743266	solcap_snp_c2_14608	4	2	1	3	4	4	4	4	4	4	3	4	3	4	3	3	3	2	4	4	3	4	4	2	3	3	2	4	3	4	4	3	2	4	3	1	4	1	4	4	4	2	2	3	2	3
chr01_67748006	chr01	67748006	ST4.03ch01_66354337	4	3	3	3	3	3	3	2	3	3	4	2	3	4	3	3	4	4	2	4	3	3	3	4	3	4	4	2	3	3	3	2	4	3	3	4	3	3	4	3	3	4	3	4	4	2
chr01_67748411	chr01	67748411	PotVar0129925	4	4	4	4	4	4	3	4	4	4	4	4	4	3	4	4	4	4	4	3	4	4	4	4	4	4	4	4	4	3	3	4	4	4	4	4	3	4	4	4	4	4	4	4	4	3
chr01_67749899	chr01	67749899	PotVar0129906	3	4	4	4	4	4	4	4	4	3	4	3	3	4	4	4	3	4	4	3	4	4	3	4	4	4	4	4	3	4	4	4	4	4	4	4	3	4	4	3	4	4	4	4	4	4
chr01_67752661	chr01	67752661	PotVar0129817	4	1	1	2	4	4	4	4	4	4	3	4	3	3	2	1	2	2	4	4	3	3	3	1	3	2	3	3	1	4	4	2	2	4	3	0	3	2	4	4	4	2	1	3	2	2
chr01_67767290	chr01	67767290	ST4.03ch01_66374307	4	2	2	3	4	4	4	4	4	4	2	4	3	2	3	3	3	2	4	4	3	2	3	2	3	2	2	3	2	4	4	2	3	4	3	0	4	3	4	4	4	2	1	4	1	3
chr01_67769198	chr01	67769198	solcap_snp_c1_4763	0	4	4	2	2	4	4	4	4	3	1	2	2	1	2	2	2	2	2	2	3	3	2	3	4	3	4	3	2	2	3	4	2	2	3	4	1	4	0	2	1	2	4	3	3	3
chr01_67819581	chr01	67819581	solcap_snp_c2_14616	2	4	4	4	3	4	3	4	4	4	3	3	4	3	2	4	3	4	4	3	4	4	3	4	4	4	4	3	4	3	3	4	2	3	3	4	3	4	0	3	3	4	4	4	3	3
chr01_67819999	chr01	67819999	candidate_SNP:67819998-67819999	2	4	4	4	3	4	4	4	4	4	3	3	4	4	3	4	3	4	4	4	4	4	3	4	4	4	4	3	4	4	4	4	2	3	3	4	4	4	0	3	3	4	4	4	4	4
chr01_67822795	chr01	67822795	ST4.03ch01_66431156	4	4	4	3	4	4	4	4	4	4	3	4	4	4	4	4	4	3	4	4	3	4	4	3	4	3	4	4	4	4	4	4	4	3	4	4	4	4	4	4	3	3	4	4	4	4
chr01_67822886	chr01	67822886	ST4.03ch01_66431247	4	2	1	2	4	4	4	4	4	4	3	4	3	4	2	2	3	2	4	4	3	3	2	2	3	2	2	3	3	4	4	3	2	4	3	0	3	1	4	4	4	2	2	3	2	3
chr01_67822946	chr01	67822946	solcap_snp_c2_14623	1	4	4	3	3	4	3	4	4	4	2	3	3	2	4	3	2	3	2	3	3	4	2	3	4	3	4	3	4	3	4	4	3	2	3	4	3	4	0	2	2	3	4	4	3	3
chr01_67825412	chr01	67825412	ST4.03ch01_66433765	2	0	0	1	3	1	0	1	2	2	3	1	0	2	1	1	1	2	0	2	1	1	2	1	1	2	2	1	0	1	0	0	1	3	0	0	0	0	4	2	3	1	0	1	2	1
chr01_67863851	chr01	67863851	candidate_SNP:67863850-67863851	4	3	4	3	4	4	4	4	4	4	4	4	4	4	4	3	4	4	4	4	4	3	3	3	4	3	4	3	3	4	4	4	4	4	3	3	3	4	4	4	4	4	3	4	4	4
chr01_67917916	chr01	67917916	ST4.03ch01_66562075	2	3	4	1	0	2	3	2	4	3	2	3	4	3	3	3	3	3	3	2	4	3	2	3	4	2	2	1	3	4	4	3	2	1	2	3	3	2	0	3	1	3	3	4	4	3
chr01_67918004	chr01	67918004	ST4.03ch01_66562163	4	3	4	3	4	4	4	4	4	4	4	4	4	4	4	3	4	4	4	4	4	3	3	3	4	3	4	3	3	4	4	4	4	4	3	3	3	4	4	4	4	4	3	4	4	4
chr01_67921505	chr01	67921505	ST4.03ch01_66565664	0	3	4	2	0	2	3	2	4	1	2	2	2	2	2	2	2	3	1	1	3	2	1	2	4	2	2	1	2	4	4	3	2	1	2	3	2	3	0	2	1	3	3	3	2	3
chr01_67929291	chr01	67929291	solcap_snp_c2_37574	0	4	4	3	0	2	3	2	4	1	2	2	2	2	2	3	3	3	1	1	3	3	2	3	4	2	2	2	3	4	4	3	2	1	3	4	3	3	0	2	1	3	4	3	3	2
chr01_67930475	chr01	67930475	ST4.03ch01_66574633	3	4	4	4	4	4	4	4	4	4	4	4	4	3	3	4	4	4	3	4	4	3	4	4	4	4	4	4	4	4	4	4	4	4	4	4	4	4	4	4	4	4	4	4	3	4
chr01_67931889	chr01	67931889	solcap_snp_c2_37571	4	3	3	3	4	3	3	3	2	4	4	3	3	3	3	3	4	4	3	4	1	2	3	4	2	4	4	3	3	3	2	2	4	3	3	4	3	4	4	3	3	3	3	2	2	4
chr01_67971977	chr01	67971977	candidate_SNP:67971976-67971977	4	2	4	3	4	4	4	4	4	4	4	4	4	4	4	3	4	4	4	4	4	3	3	3	4	3	4	3	2	4	4	4	4	4	2	3	3	4	4	4	4	4	3	4	4	4
chr01_67972786	chr01	67972786	candidate_SNP:67972785-67972786	2	1	1	1	1	4	3	4	3	2	0	3	3	2	2	1	1	0	4	2	2	2	2	0	1	0	0	2	2	2	2	3	0	1	1	0	2	1	0	2	1	0	1	2	2	1
chr01_67984467	chr01	67984467	ST4.03ch01_66629065	4	1	2	2	4	4	3	4	4	4	2	4	3	3	3	2	3	2	4	3	3	2	3	1	3	2	3	3	2	2	2	2	2	4	2	0	3	1	4	3	4	2	1	3	2	1
chr01_68075250	chr01	68075250	solcap_snp_c2_16039	4	1	1	4	4	3	3	3	1	2	1	2	3	1	3	3	2	1	1	2	0	4	3	2	2	2	2	3	2	1	2	2	3	2	3	2	3	2	4	2	2	0	2	2	1	1
chr01_68253052	chr01	68253052	solcap_snp_c2_16037	3	4	4	3	0	1	2	1	3	3	1	3	3	3	3	3	3	3	3	2	3	2	1	3	4	3	1	2	4	2	2	3	3	1	3	4	4	2	3	1	1	3	4	4	4	2
chr01_68257012	chr01	68257012	solcap_snp_c1_5145	3	4	4	3	0	1	2	1	3	1	1	3	3	3	3	3	3	2	3	2	3	2	1	3	4	3	1	2	4	2	2	3	3	1	3	4	4	3	2	2	1	3	4	4	4	2
chr01_68283160	chr01	68283160	candidate_SNP:68283159-68283160	3	4	4	3	0	1	2	1	3	2	1	3	3	3	3	3	3	3	3	2	3	2	2	3	4	3	1	2	4	2	2	3	3	1	3	4	4	3	3	2	1	3	4	4	4	3
chr01_68291136	chr01	68291136	PotVar0098809	2	0	0	1	4	3	2	3	1	3	3	1	2	2	2	1	1	1	3	1	1	3	3	1	0	1	3	1	1	2	2	1	1	3	1	0	0	1	2	2	3	1	0	1	2	2
chr01_68291439	chr01	68291439	PotVar0098794	4	0	1	0	NA	4	2	4	2	4	0	4	3	2	1	0	3	1	2	2	1	3	2	0	3	2	1	2	1	3	1	0	2	0	0	0	2	1	4	4	0	1	0	4	2	0
chr01_68292876	chr01	68292876	PotVar0098772	2	4	4	3	0	2	1	1	3	1	1	2	2	3	2	2	2	3	2	2	3	2	2	3	4	3	1	2	4	2	2	4	3	2	3	4	4	3	2	1	1	3	4	3	3	2
chr01_68296616	chr01	68296616	PotVar0098682	3	4	4	4	2	4	4	4	4	4	3	3	3	3	3	4	3	4	4	3	4	3	3	4	4	4	4	3	4	4	4	4	3	2	3	4	4	4	3	3	3	4	4	4	4	4
chr01_68299142	chr01	68299142	PotVar0098622	4	0	0	1	4	2	2	3	1	3	3	2	3	2	2	1	3	1	3	3	1	3	3	1	2	1	3	2	1	3	2	1	2	3	1	0	1	2	4	3	3	1	0	1	2	2
chr01_68299543	chr01	68299543	PotVar0098595	2		NA	0	2	0	0	0	0	1	2	2	2	3	3	0	2	0	0	1	1	2	1	0	0	0	0	2	4	0	0	0	2	3	4	NA	0	0	3	1	1	0	4	1	1	0
chr01_68349588	chr01	68349588	candidate_SNP:68349587-68349588	1	0	0	0	2	0	0	0	0	1	2	1	1	1	1	0	1	0	0	1	0	1	1	0	0	0	0	1	2	0	0	0	1	2	1	0	0	0	2	1	1	0	0	0	0	0
chr01_68360259	chr01	68360259	ST4.03ch01_67009953	4	4	4	4	4	4	4	4	4	4	4	4	4	4	3	4	4	4	4	4	4	4	4	4	4	4	4	4	4	4	4	4	4	4	4	4	4	4	4	4	4	4	4	4	2	4
chr01_68363625	chr01	68363625	solcap_snp_c2_20569	4	2	2	4	4	3	3	3	3	4	2	4	3	3	4	4	3	3	4	4	3	2	4	3	2	3	3	4	4	1	1	3	3	4	3	2	3	1	4	3	4	1	2	2	2	2
chr01_68411989	chr01	68411989	candidate_SNP:68411988-68411989	4	4	4	4	4	4	4	4	4	4	4	4	4	4	2	4	4	4	4	4	4	4	4	4	4	4	4	4	4	4	4	4	4	4	4	4	4	4	4	4	4	4	4	3	3	4
chr01_68429599	chr01	68429599	candidate_SNP:68429598-68429599	4	4	4	4	4	4	4	4	4	4	4	4	3	3	3	4	4	4	3	4	4	3	4	4	4	4	4	4	4	4	4	4	4	4	4	4	4	4	4	4	4	4	4	4	3	4
chr01_68475561	chr01	68475561	ST4.03ch01_67135860	3	4	4	4	4	4	4	4	4	4	4	4	3	2	4	4	4	4	3	4	4	3	4	4	4	4	4	4	4	4	4	4	4	4	4	4	4	4	4	4	4	4	4	4	4	4
chr01_68475775	chr01	68475775	solcap_snp_c1_6485	4	3	3	2	4	3	3	3	3	4	4	4	4	3	4	2	4	2	2	2	3	3	3	2	3	4	4	3	2	3	3	3	3	4	4	3	3	3	4	4	3	4	3	4	4	4
chr01_68549294	chr01	68549294	PotVar0098536	1	1	1	2	0	2	0	1	3	2	0	2	1	2	2	2	2	1	3	1	1	2	2	3	4	2	0	1	4	0	0	2	2	1	2	2	1	1	0	2	2	2	3	2	1	0
chr01_68549705	chr01	68549705	PotVar0098530	2	2	2	2	2	2	2	2	2	2	2	2	2	2	2	2	2	2	2	2	2	2	2	2	2	2	2	2	2	2	2	2	2	2	2	2	2	2	2	2	2	2	2	3	2	2
chr01_68549929	chr01	68549929	PotVar0098524	4	3	3	3	4	4	3	4	4	4	4	4	3	3	4	3	4	3	4	3	3	4	4	3	4	3	4	4	4	3	3	4	3	3	3	4	3	4	4	4	3	3	4	4	3	3
chr01_68562113	chr01	68562113	solcap_snp_c2_20506	2	3	3	3	1	1	2	1	3	1	2	1	3	2	2	3	2	4	2	3	3	2	2	4	4	3	4	1	3	1	1	4	3	2	3	3	3	3	2	0	3	4	3	2	2	3
chr01_68569507	chr01	68569507	PotVar0098497	4	3	3	2	4	3	4	3	1	3	4	2	4	3	3	2	3	3	3	3	2	3	3	1	1	3	4	3	2	4	4	2	3	3	2	2	3	3	4	4	3	4	3	4	4	4
chr01_68570567	chr01	68570567	PotVar0098422	4	4	4	4	4	4	4	4	4	4	4	4	4	4	4	4	3	4	4	4	4	4	2	4	4	4	4	4	4	4	4	4	4	4	4	4	4	4	4	3	4	4	3	4	4	4
chr01_68571449	chr01	68571449	PotVar0098389	2	4	4	4	1	3	3	3	3	2	2	2	3	2	2	4	3	4	3	3	4	3	2	4	4	4	4	4	4	2	2	4	3	2	3	4	4	4	2	1	3	4	3	3	3	3
chr01_68596770	chr01	68596770	candidate_SNP:68596769-68596770	4	4	4	4	4	4	4	4	4	4	4	4	4	4	4	4	4	4	4	4	4	4	4	4	4	4	4	4	4	4	4	4	4	4	4	4	4	4	4	4	4	4	4	3	4	4
chr01_68611179	chr01	68611179	candidate_SNP:68611178-68611179	1	0	1	0	0	0	0	0	0	0	0	0	2	0	0	0	0	0	1	0	0	2	0	0	1	0	3	0	0	0	0	1	0	0	1	1	1	0	0	0	0	1	0	1	0	0
chr01_68628696	chr01	68628696	solcap_snp_c2_20521	2	3	2	1	0	2	2	2	0	2	1	2	4	3	1	2	2	3	1	2	3	2	2	1	1	2	4	2	1	2	1	1	2	1	1	2	3	2	0	2	3	3	1	4	4	3
chr01_68629623	chr01	68629623	solcap_snp_c2_20522	4	3	3	3	3	4	3	3	4	4	3	4	3	3	3	3	4	3	4	3	3	4	4	4	4	3	4	3	4	3	3	4	3	3	3	4	4	4	4	4	4	3	4	4	3	2
chr01_68629838	chr01	68629838	ST4.03ch01_67294318	4	4	4	4	4	4	4	3	4	4	4	3	4	4	4	4	3	4	4	4	4	4	4	4	4	4	4	4	4	4	4	4	4	4	4	4	4	4	3	3	4	4	3	3	4	4
chr01_68651187	chr01	68651187	candidate_SNP:68651186-68651187	4	4	4	4	4	4	4	4	4	4	4	4	4	4	4	4	4	4	4	4	4	4	4	4	4	4	4	4	4	4	4	4	4	4	4	4	4	4	4	4	4	4	4	3	4	4
chr01_68652798	chr01	68652798	candidate_SNP:68652797-68652798	4	1	2	1	4	4	3	4	4	4	4	4	3	3	4	3	4	2	4	3	3	4	4	3	4	3	4	4	4	3	3	4	3	3	4	4	3	4	4	4	3	3	4	4	3	3
chr01_68667189	chr01	68667189	candidate_SNP:68667188-68667189	3	4	4	4	2	3	3	3	3	3	3	3	4	3	3	4	3	4	4	3	4	3	3	4	4	4	4	4	4	3	3	4	3	3	3	4	4	4	2	3	3	4	4	4	4	3
chr01_68699193	chr01	68699193	candidate_SNP:68699192-68699193	2	1	3	3	0	1	0	1	1	0	0	0	0	1	2	1	2	2	1	0	1	1	1	3	2	0	0	1	2	0	0	1	2	1	2	2	1	3	2	0	1	3	3	0	0	1
chr01_68733080	chr01	68733080	ST4.03ch01_67460060	3	1	3	2	3	2	1	2	4	2	2	2	1	3	3	3	3	2	1	3	1	3	2	2	4	1	2	1	3	2	2	2	3	2	4	3	2	3	4	2	1	3	3	1	0	2
chr01_68737586	chr01	68737586	candidate_SNP:68737585-68737586	4	4	4	4	4	4	4	4	3	3	4	3	4	4	4	4	3	3	4	4	4	4	4	4	3	3	4	4	4	4	4	4	4	4	4	4	4	4	4	4	4	4	4	4	4	4
chr01_68745131	chr01	68745131	ST4.03ch01_67472430	2	1	1	1	4	3	3	3	1	3	3	2	2	1	1	1	1	0	1	2	2	2	1	0	0	1	4	3	1	3	3	2	1	2	1	2	2	1	2	3	2	1	0	1	1	2
chr01_68787995	chr01	68787995	candidate_SNP:68787994-68787995	3	3	2	2	4	3	4	3	3	4	4	4	4	3	1	2	3	3	3	3	3	3	2	1	1	4	4	3	2	4	4	2	2	3	2	2	3	2	2	4	3	1	2	3	4	3
chr01_68805288	chr01	68805288	ST4.03ch01_67532944	3	4	4	4	4	4	4	4	4	4	4	3	1	3	3	4	3	4	2	3	4	2	2	4	4	4	2	4	4	4	4	4	4	4	4	4	3	4	4	3	4	4	3	2	3	4
chr01_68838380	chr01	68838380	candidate_SNP:68838379-68838380	4	4	4	4	4	4	4	4	4	4	4	3	4	4	3	4	3	4	4	4	4	4	3	4	4	4	4	4	4	4	4	4	4	4	4	4	4	4	4	3	4	4	3	2	3	4
chr01_68839590	chr01	68839590	candidate_SNP:68839589-68839590	3	4	4	4	4	4	4	4	4	4	4	4	1	4	4	4	4	4	4	3	4	3	4	4	4	4	1	4	4	4	4	4	4	4	4	4	3	4	4	4	4	4	4	4	4	4
chr01_68848343	chr01	68848343	ST4.03ch01_67584795	2	1	3	2	3	2	1	2	4	2	2	3	2	3	4	2	4	2	3	2	1	3	4	3	4	1	0	1	2	2	2	2	3	3	4	2	1	3	1	2	2	3	4	2	2	2
chr01_68852783	chr01	68852783	candidate_SNP:68852782-68852783	4	2	4	3	4	3	3	3	4	4	3	3	3	3	4	3	3	2	4	3	3	4	3	3	4	2	4	4	4	3	3	4	3	4	4	4	3	4	4	3	3	4	3	2	1	3
chr01_68866055	chr01	68866055	PotVar0072200	3	4	4	4	2	4	4	4	4	3	3	3	4	2	2	4	3	4	4	3	3	4	3	4	4	4	2	4	4	4	4	2	3	3	1	3	4	4	3	3	2	3	4	4	4	4
chr01_68866799	chr01	68866799	PotVar0072262	2	2	2	2	2	3	2	3	3	2	3	3	2	2	2	2	3	3	2	2	2	3	3	2	3	2	3	2	2	3	2	2	2	2	3	2	3	3	2	2	3	3	3	3	2	2
chr01_68867511	chr01	68867511	PotVar0072297	3	3	1	2	4	3	3	3	2	4	4	3	4	2	2	2	3	3	1	2	3	2	2	1	2	4	4	3	1	4	4	2	2	3	0	2	3	3	4	2	3	3	0	2	3	3
chr01_68869053	chr01	68869053	solcap_snp_c1_6518	3	3	1	2	4	3	3	3	2	4	4	4	3	2	2	2	4	3	1	3	3	2	3	1	2	4	4	3	1	4	4	2	3	3	1	2	3	3	4	4	3	3	1	3	3	3
chr01_68878583	chr01	68878583	ST4.03ch01_67616256	4	4	4	4	4	4	4	4	4	4	2	4	4	4	4	4	4	4	4	4	3	4	4	4	4	4	2	4	4	4	4	3	4	4	4	3	4	4	3	4	3	3	4	4	4	4
chr01_68919105	chr01	68919105	ST4.03ch01_67658425	4	4	4	4	4	4	4	4	4	4	4	3	4	4	4	4	3	4	4	4	4	4	3	4	4	4	4	4	4	4	4	4	4	4	4	4	4	4	4	2	4	4	3	3	4	4
chr01_68935188	chr01	68935188	candidate_SNP:68935187-68935188	2	1	1	1	4	3	2	2	1	2	3	3	3	1	2	3	4	1	2	2	2	2	2	0	1	2	4	1	1	3	1	2	1	2	1	1	2	4	3	3	2	1	1	3	0	3
chr01_68993600	chr01	68993600	candidate_SNP:68993599-68993600	1	0	0	0	0	2	0	2	2	2	1	1	2	1	1	0	3	1	1	1	0	2	1	1	1	1	2	2	1	2	2	0	0	1	0	1	2	2	0	2	1	1	1	2	1	1
chr01_68995686	chr01	68995686	solcap_snp_c1_6521	4	4	4	4	2	4	4	4	4	3	4	3	4	3	3	4	3	4	4	3	4	4	3	4	3	4	4	4	4	4	4	4	4	3	3	4	4	4	4	4	4	3	4	3	4	4
chr01_69114694	chr01	69114694	ST4.03ch01_67859037	4	4	4	4	4	4	4	4	4	3	4	3	4	4	4	4	3	4	4	4	4	4	3	4	4	4	4	3	4	4	4	4	4	4	4	4	4	4	4	3	4	4	3	3	4	4
chr01_69123996	chr01	69123996	candidate_SNP:69123995-69123996	0	0	0	0	4	1	1	1	1	1	0	1	0	1	2	0	1	0	1	1	0	0	1	0	0	0	0	0	0	1	1	1	0	1	1	0	0	2	0	0	0	1	0	0	0	1
chr01_69125589	chr01	69125589	candidate_SNP:69125588-69125589	3	4	4	4	4	4	4	4	4	4	4	4	2	4	4	4	4	4	4	3	4	3	3	4	4	4	2	4	4	4	4	4	4	4	4	4	3	4	4	4	4	4	4	4	4	4
chr01_69151882	chr01	69151882	solcap_snp_c2_13766	1	0	0	0	4	2	1	2	1	3	1	2	2	1	2	0	3	0	1	2	0	2	3	0	1	0	2	2	1	2	2	1	0	1	2	0	1	2	0	2	0	2	1	2	0	2
chr01_69213561	chr01	69213561	candidate_SNP:69213560-69213561	4	4	4	4	4	4	4	4	4	4	4	4	4	4	3	4	4	4	4	4	4	4	4	4	4	4	4	4	4	4	4	4	4	4	4	4	4	4	4	4	4	4	4	4	3	4
chr01_69219161	chr01	69219161	solcap_snp_c2_52492	3	1	1	1	4	2	3	2	1	3	4	3	4	3	3	1	3	0	3	3	2	3	3	0	0	1	4	3	1	4	4	2	1	1	1	2	3	3	3	3	1	2	1	1	2	3
chr01_69245287	chr01	69245287	solcap_snp_c2_13758	4	4	4	4	0	3	3	3	3	3	3	3	3	2	2	4	2	4	3	2	4	4	3	4	4	4	4	4	4	2	2	2	4	3	3	4	3	2	4	4	4	3	4	4	3	1
chr01_69271189	chr01	69271189	candidate_SNP:69271188-69271189	4	4	4	4	4	3	4	3	4	4	4	4	4	4	3	4	4	4	4	4	4	4	4	4	4	4	4	4	4	4	4	4	4	4	4	4	4	4	4	4	4	4	4	3	2	4
chr01_69275036	chr01	69275036	candidate_SNP:69275035-69275036	4	4	4	4	3	4	3	4	4	4	4	4	4	4	4	4	3	4	4	4	4	3	4	4	4	4	4	3	4	4	4	4	4	4	4	4	4	4	4	3	4	4	4	2	4	4
chr01_69316794	chr01	69316794	candidate_SNP:69316793-69316794	4	4	4	4	4	3	4	3	4	4	4	4	4	4	3	4	4	4	4	4	4	4	4	4	4	4	4	4	4	4	4	4	4	4	4	4	4	4	4	4	4	4	4	3	2	4
chr01_69319980	chr01	69319980	candidate_SNP:69319979-69319980	2	1	1	1	0	1	0	1	0	1	1	0	2	0	0	2	0	0	0	2	1	1	1	0	0	1	1	2	1	1	1	0	1	0	0	1	1	1	1	0	0	0	0	0	0	0
chr01_69333593	chr01	69333593	candidate_SNP:69333592-69333593	4	4	4	4	4	3	4	3	4	4	4	4	4	4	3	4	4	4	4	4	4	4	4	4	4	4	4	4	4	4	4	4	4	4	4	4	4	4	4	4	4	4	4	2	3	4
chr01_69375969	chr01	69375969	candidate_SNP:69375968-69375969	3	1	1	1	4	4	3	4	2	4	4	3	4	3	3	1	4	2	3	3	2	3	3	1	1	2	4	4	1	4	4	2	1	2	1	3	4	3	3	3	2	2	0	3	3	3
chr01_69378369	chr01	69378369	candidate_SNP:69378368-69378369	4	4	4	4	4	3	4	3	4	4	4	4	3	3	3	4	4	4	3	4	4	3	4	4	4	4	4	4	4	4	4	4	4	4	4	4	4	4	4	4	4	4	4	3	3	4
chr01_69539263	chr01	69539263	PotVar0072370	3	2	2	3	4	3	2	3	2	2	3	2	3	3	3	3	4	2	4	3	3	3	2	3	3	2	2	3	2	2	2	3	2	2	2	2	3	2	2	3	2	3	2	2	3	3
chr01_69539477	chr01	69539477	PotVar0072385	3	2	2	2	4	3	3	3	3	3	2	3	3	3	3	2	3	2	3	3	3	3	3	2	3	3	2	3	3	3	3	2	3	3	3	2	3	3	4	3	3	3	3	4	3	4
chr01_69539957	chr01	69539957	PotVar0072434	3	4	4	4	4	2	3	2	4	2	1	3	2	3	3	4	3	4	2	3	3	2	2	3	4	4	0	2	3	3	3	3	4	3	4	1	2	3	3	2	3	3	4	1	3	3
chr01_69540143	chr01	69540143	PotVar0072439	3	4	4	4	4	4	4	4	4	4	4	4	4	3	3	4	4	4	3	4	4	3	4	4	4	4	4	4	4	4	4	4	4	4	4	4	4	4	4	4	4	4	4	2	4	4
chr01_69540181	chr01	69540181	PotVar0072440	4	4	4	4	4	4	4	4	4	2	4	4	4	4	4	4	3	4	4	4	4	4	4	4	4	4	4	4	4	4	4	4	4	4	4	4	4	4	4	3	4	4	4	3	4	4
chr01_69540203	chr01	69540203	PotVar0072441	1	0	0	0	0	2	1	0	0	3	3	1	2	0	0	0	1	0	0	0	0	1	2	0	1	0	4	2	3	1	2	1	0	1	0	1	2	1	1	4	2	2	0	1	0	1
chr01_69540230	chr01	69540230	PotVar0072443	1	0	0	0	0	2	1	0	0	1	1	1	2	0	0	0	0	0	0	1	0	1	2	0	1	1	2	2	3	1	2	0	0	1	0	0	2	1	1	3	0	1	0	0	0	1
chr01_69562392	chr01	69562392	candidate_SNP:69562391-69562392	2	3	4	4	2	2	3	2	4	2	2	3	3	3	3	3	2	4	3	2	3	2	3	4	4	4	2	3	4	2	2	2	3	3	4	3	2	2	3	2	4	4	4	4	4	2
chr01_69577842	chr01	69577842	candidate_SNP:69577841-69577842	4	4	4	4	4	4	4	4	4	3	4	3	4	4	4	4	3	4	4	4	4	4	3	4	4	4	4	3	4	4	4	4	4	4	4	4	4	4	4	3	4	4	4	3	4	4
chr01_69595978	chr01	69595978	candidate_SNP:69595977-69595978	4	4	4	4	4	3	4	3	4	4	4	4	3	3	4	4	4	4	2	4	4	3	4	4	4	4	4	4	4	4	4	4	4	4	4	4	4	4	4	4	4	4	4	2	2	4
chr01_69643019	chr01	69643019	solcap_snp_c2_49473	3	4	4	4	4	3	4	3	4	4	2	4	3	3	3	4	4	4	2	4	3	3	4	3	4	4	2	3	4	4	4	3	4	4	4	2	3	4	3	4	3	3	4	2	3	4
chr01_69655900	chr01	69655900	solcap_snp_c2_49476	3	3	3	3	0	3	2	3	4	3	3	2	3	2	2	3	2	4	3	3	3	4	3	4	4	3	4	3	4	3	3	3	3	4	3	2	3	2	2	3	4	2	4	4	3	3
chr01_69659173	chr01	69659173	solcap_snp_c2_49451	1	2	3	2	0	3	0	3	2	2	3	1	1	2	2	2	1	4	3	0	3	2	1	3	4	3	2	1	4	0	1	2	2	3	3	2	0	3	2	1	4	3	4	3	2	2
chr01_69679181	chr01	69679181	candidate_SNP:69679180-69679181	4	4	4	4	4	3	4	3	4	3	3	4	4	4	4	4	4	4	4	4	4	4	4	4	4	4	4	3	3	4	4	4	4	4	4	4	4	3	4	4	4	4	4	4	4	4
chr01_69686390	chr01	69686390	ST4.03ch01_68444043	2	3	3	3	0	3	1	2	2	2	3	1	1	2	2	3	1	3	3	1	3	3	3	4	3	2	2	3	4	1	1	3	3	2	3	3	1	2	2	2	3	2	4	4	3	1
chr01_69686405	chr01	69686405	ST4.03ch01_68444058	2	3	3	3	0	3	1	2	2	2	3	1	1	2	2	3	1	3	3	1	3	3	3	4	3	2	2	3	4	1	1	3	3	2	3	3	1	2	2	2	3	2	4	4	3	1
chr01_69693401	chr01	69693401	ST4.03ch01_68451226	4	4	4	4	4	4	4	4	4	4	4	4	4	4	4	4	4	4	4	4	4	4	4	4	4	4	3	4	4	4	4	4	4	4	4	3	4	4	4	4	4	4	4	4	4	4
chr01_69717598	chr01	69717598	candidate_SNP:69717597-69717598	4	4	4	4	4	4	4	4	4	3	4	3	4	4	4	4	2	4	4	4	4	4	3	4	4	4	4	3	4	4	4	4	4	4	4	4	4	4	4	2	4	4	4	3	4	4
chr01_69759935	chr01	69759935	ST4.03ch01_68524527	3	4	4	4	4	3	4	3	4	4	4	4	3	3	3	4	4	4	3	4	4	3	4	3	4	4	4	3	4	4	4	4	4	4	4	3	3	4	4	4	4	4	4	2	2	4
chr01_69764000	chr01	69764000	candidate_SNP:69763999-69764000	4	4	4	3	4	3	3	3	2	2	3	4	4	3	4	4	3	3	4	4	3	4	4	4	2	3	4	3	4	4	3	4	4	3	4	3	4	4	4	4	3	3	4	4	4	4
chr01_69764456	chr01	69764456	solcap_snp_c1_14044	1	1	1	1	4	3	3	2	2	4	2	3	3	2	3	1	4	1	2	3	2	2	3	0	2	2	2	3	2	3	2	1	1	3	2	1	3	3	3	3	1	3	0	1	1	3
chr01_69765542	chr01	69765542	candidate_SNP:69765541-69765542	3	1	2	1	4	4	3	4	2	4	4	3	4	3	3	2	4	1	3	3	2	3	3	1	2	2	4	4	2	3	3	2	1	2	1	3	4	3	3	3	2	4	0	4	3	3
chr01_69774570	chr01	69774570	ST4.03ch01_68540184	3	1	1	1	4	4	3	4	2	4	4	3	4	2	3	1	4	1	3	3	2	3	3	1	2	2	4	4	1	3	2	2	1	2	1	3	4	3	3	3	2	4	0	4	3	3
chr01_69774610	chr01	69774610	ST4.03ch01_68540224	3	1	1	1	4	4	3	4	2	4	4	3	4	2	3	1	4	1	3	3	2	3	3	1	2	2	4	4	1	3	2	2	1	2	1	3	4	3	3	3	2	4	0	4	3	3
chr01_69777490	chr01	69777490	candidate_SNP:69777489-69777490	2	0	1	1	4	4	3	4	2	4	4	2	4	3	3	0	4	2	3	3	3	3	2	1	3	2	4	4	2	2	3	3	2	2	0	3	4	3	3	2	1	4	0	4	3	3
chr01_69822385	chr01	69822385	candidate_SNP:69822384-69822385	4	4	4	4	4	3	4	3	4	4	4	4	4	4	3	4	4	4	4	4	4	4	4	4	4	4	4	4	4	4	4	4	4	4	4	4	4	4	4	4	4	4	4	3	3	4
chr01_69837572	chr01	69837572	candidate_SNP:69837571-69837572	2	1	1	1	0	0	2	0	0	0	0	1	3	0	0	1	0	0	0	1	1	2	0	0	1	1	4	1	0	2	1	0	0	1	0	2	3	0	0	1	0	3	0	2	0	2
chr01_69839131	chr01	69839131	candidate_SNP:69839130-69839131	4	4	4	4	4	2	4	3	3	3	4	4	4	4	4	4	3	3	4	4	4	4	4	4	3	3	4	4	4	4	4	4	4	3	4	4	4	4	4	4	3	4	4	4	4	4
chr01_69864720	chr01	69864720	candidate_SNP:69864719-69864720	3	4	4	4	4	4	4	4	4	4	3	4	4	4	4	4	4	4	4	4	3	4	3	4	4	4	2	4	4	4	4	3	4	4	4	3	4	4	3	4	2	3	4	4	4	4
chr01_69881583	chr01	69881583	candidate_SNP:69881582-69881583	3	4	4	4	2	3	4	3	4	3	3	4	3	2	3	4	3	4	1	3	3	3	2	4	4	4	2	4	4	4	4	3	4	4	3	3	4	4	3	4	3	4	4	3	2	4
chr01_69882330	chr01	69882330	candidate_SNP:69882329-69882330	4	4	4	4	4	3	4	4	4	4	4	4	3	4	3	4	4	4	1	4	4	3	4	4	4	4	4	3	4	4	4	4	4	4	4	4	4	4	4	4	4	4	4	3	3	4
chr01_69889979	chr01	69889979	solcap_snp_c2_47313	3	4	4	4	4	2	4	2	3	3	2	4	3	3	3	4	3	3	3	4	3	3	3	3	2	3	2	3	3	4	4	3	4	3	4	2	3	4	3	4	2	3	4	1	2	4
chr01_70094473	chr01	70094473	candidate_SNP:70094472-70094473	4	4	4	4	4	4	4	4	4	4	4	4	4	4	4	4	4	4	4	4	4	4	4	4	4	4	4	4	4	4	4	4	4	4	4	4	4	4	4	4	4	4	4	3	4	4
chr01_70098301	chr01	70098301	candidate_SNP:70098300-70098301	4	4	4	4	4	3	4	3	4	4	4	4	4	4	3	4	4	4	4	4	4	4	4	4	4	4	4	4	4	4	4	4	4	4	4	4	4	4	4	4	4	4	4	3	2	4
chr01_70111603	chr01	70111603	ST4.03ch01_68951921	4	4	4	4	4	3	4	3	3	3	4	4	4	4	4	4	3	3	4	4	4	4	4	4	2	3	4	4	4	4	4	4	4	3	4	4	4	4	4	4	3	3	4	3	4	4
chr01_70113468	chr01	70113468	PotVar0043740	3	3	3	3	0	3	2	2	4	3	3	2	1	2	3	3	2	4	3	2	4	3	3	4	4	4	3	3	4	2	2	3	3	4	2	4	1	2	2	2	4	1	4	4	3	2
chr01_70113946	chr01	70113946	PotVar0043707	4	4	4	4	4	3	4	3	4	4	3	4	4	4	3	4	4	4	4	4	4	4	4	3	3	4	3	3	4	4	4	4	4	4	4	3	4	4	4	4	4	3	4	3	2	4
chr01_70119974	chr01	70119974	candidate_SNP:70119973-70119974	4	4	4	4	4	3	4	3	4	4	3	4	4	4	3	4	4	4	4	4	3	4	3	3	4	4	2	3	4	4	4	3	4	4	4	2	4	4	3	4	3	4	4	3	2	4
chr01_70122367	chr01	70122367	candidate_SNP:70122366-70122367	4	4	4	4	4	3	4	3	4	4	2	4	4	4	3	4	4	3	4	4	3	4	3	4	4	4	3	4	4	4	4	4	4	4	4	2	4	4	3	4	3	4	4	3	2	4
chr01_70180974	chr01	70180974	PotVar0043650	3	2	2	3	4	4	3	4	3	4	4	3	4	3	3	3	4	4	3	3	3	3	3	3	2	4	4	4	2	3	3	2	3	3	2	4	4	3	3	3	3	4	1	4	4	3
chr01_70207146	chr01	70207146	candidate_SNP:70207145-70207146	3	4	4	4	4	3	4	3	4	4	2	4	3	2	3	4	4	4	1	4	2	3	3	4	4	4	2	4	4	4	4	2	4	4	4	3	4	4	3	4	2	4	4	2	2	4
chr01_70263280	chr01	70263280	ST4.03ch00_28717748	3	3	2	3	4	3	3	3	3	4	2	2	3	2	2	3	4	4	0	3	3	3	2	3	2	4	2	4	1	3	3	2	3	2	1	3	4	2	2	3	1	4	0	2	2	3
chr01_70272773	chr01	70272773	solcap_snp_c1_16178	2	2	3	2	0	2	2	1	3	1	0	2	3	0	2	2	1	1	2	2	2	2	1	1	3	2	4	2	2	2	2	1	1	3	2	2	2	0	1	2	2	2	2	2	0	2
chr01_70410975	chr01	70410975	solcap_snp_c1_11769	3	3	1	2	4	4	4	4	2	3	4	3	4	4	3	2	3	3	3	3	3	4	3	2	3	4	4	2	1	3	3	2	2	3	3	2	4	4	3	2	3	2	2	2	4	4
chr01_70434397	chr01	70434397	candidate_SNP:70434396-70434397	4	4	4	4	4	3	4	3	3	3	4	4	4	4	4	4	3	3	4	4	4	4	4	4	2	3	4	4	4	4	4	4	3	4	4	4	4	4	2	4	4	3	4	3	4	4
chr01_70469471	chr01	70469471	candidate_SNP:70469470-70469471	4	4	4	4	4	3	4	3	4	4	4	3	4	4	3	4	4	4	4	4	4	4	3	4	4	4	4	4	4	4	4	4	4	4	4	4	4	4	4	4	4	4	4	3	2	4
chr01_70471588	chr01	70471588	ST4.03ch01_69261647	4	4	3	3	4	4	4	4	4	3	4	3	4	4	4	3	3	3	4	4	4	4	4	3	4	4	4	3	3	4	4	4	3	4	4	3	4	4	4	3	4	3	4	3	4	4
chr01_70487993	chr01	70487993	candidate_SNP:70487992-70487993	4	4	4	4	4	3	4	3	4	4	4	4	4	4	3	4	4	3	4	4	4	4	4	3	4	4	4	4	4	4	4	4	4	4	4	4	4	4	4	4	4	4	4	2	1	3
chr01_70495916	chr01	70495916	candidate_SNP:70495915-70495916	4	4	3	3	4	4	4	4	4	3	4	3	4	4	4	3	3	3	4	4	4	4	4	3	4	4	4	3	2	4	4	4	3	4	4	3	4	4	4	3	4	3	4	3	4	4
chr01_70535992	chr01	70535992	candidate_SNP:70535991-70535992	4	4	3	3	4	4	4	4	4	3	4	3	4	4	4	3	3	3	4	4	4	4	4	3	4	4	4	3	3	4	4	4	3	3	4	3	4	4	4	3	4	3	4	3	4	4
chr01_70547981	chr01	70547981	candidate_SNP:70547980-70547981	4	4	4	4	4	4	4	4	4	4	4	4	4	4	4	4	4	4	4	4	4	4	4	4	4	4	4	4	4	3	3	4	4	4	4	4	4	4	4	4	4	4	4	4	4	4
chr01_70548475	chr01	70548475	ST4.03ch01_69339868	4	4	4	4	4	4	4	4	4	4	4	3	4	4	4	4	4	4	4	4	4	4	4	4	4	4	4	4	4	4	4	4	4	4	4	4	4	4	4	4	4	4	4	4	4	4
chr01_70554331	chr01	70554331	candidate_SNP:70554330-70554331	4	4	4	4	4	3	4	3	4	4	4	4	4	4	3	4	4	4	4	4	4	4	4	4	4	4	4	4	4	4	4	4	4	4	4	4	4	4	4	4	4	4	4	3	2	4
chr01_70555970	chr01	70555970	candidate_SNP:70555969-70555970	2	4	4	4	3	3	4	3	4	4	4	4	3	3	3	4	4	4	2	4	4	3	4	4	4	4	4	4	4	4	4	3	4	4	4	4	4	4	4	4	4	4	4	3	3	3
chr01_70596774	chr01	70596774	candidate_SNP:70596773-70596774	4	4	4	4	4	3	4	3	4	4	4	4	4	4	3	4	4	4	4	4	4	4	4	4	4	4	4	4	4	4	4	4	4	4	4	4	4	4	4	4	4	4	4	3	3	4
chr01_70849984	chr01	70849984	ST4.03ch01_69644255	4	4	4	4	4	3	4	3	4	4	4	4	4	4	4	4	4	3	4	4	4	4	4	4	4	3	4	4	4	4	4	4	3	4	4	4	4	4	2	4	4	4	4	4	4	4
chr01_70855807	chr01	70855807	ST4.03ch01_69650078	4	4	4	4	4	3	4	3	4	4	4	4	4	4	3	4	4	4	4	4	4	4	4	4	4	4	4	4	4	4	4	4	4	4	4	4	4	4	4	4	4	4	4	3	3	4
chr01_70862368	chr01	70862368	candidate_SNP:70862367-70862368	2	0	1	0	2	2	0	3	0	0	0	0	1	1	1	0	0	0	2	0	0	1	0	0	0	1	0	0	0	0	0	2	1	0	0	0	0	0	2	0	0	0	0	2	3	1
chr01_70883948	chr01	70883948	candidate_SNP:70883947-70883948	0	1	1	1	0	2	1	1	1	1	0	0	2	0	0	1	2	1	3	1	1	3	0	1	1	1	2	1	0	2	2	1	0	1	0	2	2	0	1	1	0	1	0	2	1	2
chr01_70930398	chr01	70930398	candidate_SNP:70930397-70930398	3	4	4	4	4	3	4	4	4	4	4	4	3	4	3	4	4	4	3	4	4	4	4	4	4	4	4	4	4	4	4	2	4	4	4	4	4	4	4	4	4	4	4	3	4	3
chr01_70931592	chr01	70931592	ST4.03ch01_69725767	3	3	4	3	3	2	2	2	3	3	4	4	2	3	3	3	3	3	1	3	3	1	4	3	3	2	2	3	4	3	3	3	3	3	4	2	2	4	2	4	4	3	4	2	1	2
chr01_70932779	chr01	70932779	candidate_SNP:70932778-70932779	2	3	4	3	3	2	2	2	3	3	4	4	1	3	3	3	3	3	1	3	3	1	4	3	3	1	2	3	4	3	3	3	3	3	4	2	2	4	2	4	4	3	4	2	2	2
chr01_70934366	chr01	70934366	candidate_SNP:70934365-70934366	3	4	4	4	4	4	4	4	4	4	4	4	3	3	4	4	4	4	2	4	4	3	4	4	4	4	4	4	4	4	4	4	4	4	4	4	4	4	4	4	4	4	4	3	4	4
chr01_71013700	chr01	71013700	solcap_snp_c2_17592	0	2	2	2	3	3	2	3	1	3	4	2	1	3	2	2	3	4	0	2	2	2	3	2	1	2	2	3	2	2	2	1	2	1	2	3	2	4	1	2	3	3	2	2	2	1
chr01_71052741	chr01	71052741	candidate_SNP:71052740-71052741	3	4	4	4	2	1	4	2	4	3	3	4	3	3	2	4	4	3	2	4	4	3	3	4	4	3	4	3	4	3	3	3	3	4	4	4	4	3	3	3	4	4	4	3	2	3
chr01_71055972	chr01	71055972	candidate_SNP:71055971-71055972	3	4	4	4	3	1	4	1	4	3	4	4	3	3	3	4	4	2	1	4	4	3	3	4	4	3	4	3	4	3	3	3	3	4	4	4	4	3	2	3	4	4	4	2	3	3
chr01_71071536	chr01	71071536	PotVar0043516	2	4	3	3	0	1	3	1	3	2	2	4	3	1	2	3	3	3	1	2	3	2	2	3	3	2	4	3	3	2	2	2	2	4	2	4	3	3	2	3	3	2	3	1	1	3
chr01_71093911	chr01	71093911	PotVar0043426	1	0	1	1	4	0	1	0	1	1	1	0	1	3	1	1	1	1	3	1	1	2	1	1	1	1	0	0	1	2	2	2	2	0	2	0	1	1	2	1	1	1	2	2	1	1
chr01_71095437	chr01	71095437	PotVar0043403	3	4	3	4	4	4	4	4	4	4	4	4	4	4	4	4	4	4	4	4	4	4	4	4	4	4	4	4	4	4	4	4	3	4	4	4	4	4	3	4	4	3	4	3	4	4
chr01_71099959	chr01	71099959	solcap_snp_c2_17529	0	0	0	0	3	1	1	1	1	1	1	0	0	2	1	1	1	2	0	1	1	1	1	1	1	2	0	0	1	2	1	1	1	0	1	0	1	1	0	1	1	0	2	0	1	0
chr01_71200746	chr01	71200746	candidate_SNP:71200745-71200746	3	4	4	4	3	3	4	3	4	4	4	4	3	3	4	4	4	3	1	4	4	3	4	4	3	4	4	4	4	4	4	3	4	4	4	4	4	4	4	4	4	4	4	2	3	3
chr01_71212428	chr01	71212428	solcap_snp_c2_17531	4	4	4	3	1	4	3	4	3	3	3	4	4	2	3	3	3	3	4	3	3	3	3	3	3	3	4	4	3	3	3	3	3	4	2	4	3	3	4	4	3	4	2	4	3	4
chr01_71219200	chr01	71219200	candidate_SNP:71219199-71219200	3	4	4	4	3	2	4	1	4	4	3	4	3	3	3	4	4	3	1	4	4	3	4	4	4	3	4	4	4	4	4	3	4	4	4	4	4	4	4	4	4	4	4	3	2	3
chr01_71236776	chr01	71236776	candidate_SNP:71236775-71236776	0	3	1	1	0	1	2	1	1	1	0	0	3	0	0	1	1	1	0	1	1	2	0	1	1	2	2	2	0	2	2	0	0	0	0	2	2	1	0	1	0	1	0	2	0	1
chr01_71243947	chr01	71243947	candidate_SNP:71243946-71243947	4	4	4	4	3	4	4	4	4	4	4	4	4	4	4	4	4	4	3	4	4	4	4	4	4	4	4	4	4	4	4	3	4	4	4	4	4	4	4	4	4	4	4	4	4	3
chr01_71291859	chr01	71291859	solcap_snp_c2_17537	4	0	3	2	0	2	0	3	2	3	1	4	1	1	3	3	2	3	3	1	4	1	2	3	2	1	1	2	3	1	1	2	4	4	2	2	0	2	4	3	4	2	2	3	3	1
chr01_71348797	chr01	71348797	candidate_SNP:71348796-71348797	3	4	4	4	3	3	4	3	4	4	3	4	3	3	3	4	4	4	1	4	4	3	4	4	4	4	4	4	4	3	3	3	4	4	4	4	4	4	4	4	4	4	4	3	2	3
chr01_71355999	chr01	71355999	candidate_SNP:71355998-71355999	4	4	4	4	3	4	4	4	4	4	4	4	4	4	4	4	4	4	3	4	4	4	4	4	4	4	4	4	4	4	4	2	4	4	4	4	4	4	4	4	4	4	4	4	4	3
chr01_71390778	chr01	71390778	ST4.03ch01_70197611	3	4	4	4	3	4	4	3	4	4	3	4	3	4	3	4	4	4	2	4	4	4	4	4	4	4	4	4	4	4	3	3	4	4	4	4	4	4	4	4	4	4	4	3	3	4
chr01_71396783	chr01	71396783	candidate_SNP:71396782-71396783	4	4	4	4	4	3	4	4	4	4	3	4	4	4	3	4	4	4	4	4	4	4	4	4	4	4	4	4	4	4	4	4	4	4	4	4	4	4	4	4	4	4	4	3	3	4
chr01_71412790	chr01	71412790	candidate_SNP:71412789-71412790	4	4	4	4	4	3	4	4	4	4	3	4	4	4	3	4	4	4	4	4	4	4	4	4	4	4	4	4	4	4	4	4	4	4	4	4	4	4	4	4	4	4	4	3	2	4
chr01_71416070	chr01	71416070	solcap_snp_c2_17539	1	3	1	1	1	2	1	2	1	0	1	0	3	1	1	1	1	2	3	1	1	3	0	0	1	3	2	1	0	2	1	2	0	0	0	1	1	0	0	1	0	2	0	2	2	2
chr01_71435578	chr01	71435578	solcap_snp_c1_5762	3	4	2	1	3	0	4	0	4	2	3	2	3	4	3	3	3	1	1	4	1	3	1	2	4	2	1	2	2	3	3	2	1	1	4	1	4	1	2	3	1	2	4	3	2	4
chr01_71516041	chr01	71516041	candidate_SNP:71516040-71516041	3	4	4	4	3	3	4	2	4	4	2	4	3	3	3	4	4	4	3	4	4	3	4	4	4	4	4	3	4	4	4	3	4	4	4	4	4	3	4	4	4	4	4	3	3	4
chr01_71530931	chr01	71530931	solcap_snp_c1_15579	0	4	2	1	4	2	4	3	2	3	4	0	4	2	2	2	4	3	0	3	2	2	1	0	2	3	2	2	2	1	3	3	0	0	3	1	4	2	0	0	0	1	3	1	2	2
chr01_71530961	chr01	71530961	solcap_snp_c1_15580	0	4	2	1	4	2	4	3	2	3	4	0	4	2	2	2	4	3	0	2	2	2	1	0	2	3	2	2	2	1	3	3	0	0	3	1	4	2	0	0	0	1	3	1	2	2
chr01_71532789	chr01	71532789	candidate_SNP:71532788-71532789	0	3	0	1	3	1	4	1	2	2	2	0	3	2	1	1	3	3	0	3	1	3	1	0	2	3	2	2	1	1	1	1	0	0	2	1	4	2	0	1	0	1	2	0	1	1
chr01_71560862	chr01	71560862	solcap_snp_c2_53380	3	1	3	1	3	3	3	3	2	1	2	1	2	4	3	2	1	2	4	3	2	2	1	1	3	1	0	3	3	3	3	2	2	2	4	0	3	2	1	3	2	1	2	3	3	3
chr01_71583147	chr01	71583147	candidate_SNP:71583146-71583147	4	4	4	4	4	4	4	4	4	4	4	4	4	4	4	4	4	4	3	4	4	4	4	4	4	4	4	4	4	4	4	3	4	4	4	4	4	4	4	4	4	4	4	4	4	3
chr01_71588172	chr01	71588172	ST4.03ch01_70399101	4	4	4	4	2	4	4	4	4	4	4	4	4	4	4	4	4	4	3	3	4	4	4	4	4	4	4	4	4	3	3	3	4	4	4	4	3	4	4	3	4	4	4	4	4	3
chr01_71600325	chr01	71600325	ST4.03ch01_70411250	1	2	2	1	2	1	0	2	2	0	0	2	1	3	1	1	0	0	3	2	1	1	1	1	2	1	0	1	2	3	3	1	1	1	1	0	1	1	1	3	1	1	2	1	0	1
chr01_71601531	chr01	71601531	candidate_SNP:71601530-71601531	2	1	2	1	1	2	0	2	2	0	0	2	0	1	2	1	1	1	1	2	1	0	1	2	2	1	0	1	1	2	2	2	0	2	2	0	1	1	1	3	1	1	2	1	0	2
chr01_71604202	chr01	71604202	solcap_snp_c2_17204	3	1	2	1	2	2	0	3	3	0	0	2	2	2	3	2	1	1	4	1	1	0	1	3	3	2	0	1	3	3	3	3	1	3	2	0	1	1	0	4	0	1	3	2	3	2
chr01_71621531	chr01	71621531	candidate_SNP:71621530-71621531	2	2	3	3	3	2	3	1	2	4	2	3	2	3	3	3	2	3	2	2	3	3	2	3	2	2	3	3	3	2	2	2	2	3	2	3	3	2	2	3	3	3	4	3	3	2
chr01_71623187	chr01	71623187	candidate_SNP:71623186-71623187	3	3	4	4	3	2	3	2	3	4	4	4	2	3	4	4	2	3	2	3	4	2	4	3	2	3	3	2	4	3	3	2	3	3	3	3	4	1	2	4	3	4	4	4	3	1
chr01_71624217	chr01	71624217	candidate_SNP:71624216-71624217	3	3	3	3	2	1	2	2	4	3	2	2	2	3	3	2	4	3	1	2	2	2	3	2	3	4	3	3	4	2	3	2	4	2	1	3	2	4	3	2	3	3	2	2	3	3
chr01_71637216	chr01	71637216	ST4.03ch01_70449103	2	2	3	3	4	1	4	2	2	4	4	2	4	3	2	4	4	3	2	3	2	4	2	3	3	3	4	3	2	2	3	3	3	2	2	4	4	3	3	2	3	4	2	3	2	3
chr01_71662917	chr01	71662917	solcap_snp_c2_17191	1	3	3	3	3	1	4	2	3	4	3	2	3	2	3	3	4	2	0	2	2	3	2	4	1	3	4	3	3	2	2	2	3	1	2	4	3	2	3	1	2	4	2	2	2	2
chr01_71714544	chr01	71714544	solcap_snp_c1_5669	2	3	2	3	4	4	4	4	2	4	4	2	4	2	3	3	4	4	3	3	3	4	3	3	3	4	4	4	2	3	3	3	3	2	3	4	4	4	3	2	3	3	3	3	4	3
chr01_71717501	chr01	71717501	solcap_snp_c1_5667	1	3	2	3	3	3	4	2	2	4	3	2	2	2	2	3	4	3	1	3	3	2	4	3	2	3	4	4	2	1	1	3	3	3	3	4	3	4	1	1	4	2	3	3	3	3
chr01_71744610	chr01	71744610	candidate_SNP:71744609-71744610	3	4	3	4	2	2	4	3	4	4	4	4	2	3	3	4	4	4	1	4	4	3	4	4	4	4	4	4	4	3	3	3	3	4	4	4	4	4	2	4	4	4	4	3	3	3
chr01_71751985	chr01	71751985	solcap_snp_c1_5656	2	3	3	3	3	3	4	3	3	4	3	4	3	2	2	3	4	4	0	3	3	3	3	3	2	4	4	4	2	3	3	2	3	2	3	4	4	4	2	4	3	3	2	2	2	3
chr01_71777511	chr01	71777511	candidate_SNP:71777510-71777511	4	4	4	4	4	4	4	4	4	4	4	4	4	4	4	4	4	4	4	4	4	4	4	4	4	4	4	4	4	4	4	4	4	4	4	4	4	4	3	4	4	4	4	4	4	4
chr01_71779949	chr01	71779949	candidate_SNP:71779948-71779949	4	4	4	4	3	4	4	4	4	4	4	4	4	4	4	4	4	4	3	4	4	4	4	4	4	4	4	4	4	4	4	3	4	4	4	4	4	4	4	4	4	4	4	4	4	3
chr01_71783102	chr01	71783102	candidate_SNP:71783101-71783102	4	4	4	4	3	4	4	4	4	4	4	4	4	4	4	4	4	4	4	4	3	4	4	4	4	4	4	4	4	4	4	3	4	4	4	4	4	4	4	4	4	4	4	4	4	4
chr01_71790931	chr01	71790931	solcap_snp_c1_5653	1	3	2	3	4	2	4	2	3	4	3	2	3	2	2	3	4	3	1	3	3	3	3	3	2	3	4	4	2	2	2	3	3	3	3	4	4	4	3	2	3	3	3	2	2	3
chr01_71832110	chr01	71832110	solcap_snp_c2_17157	1	0	1	0	0	0	0	0	0	0	0	1	0	0	0	0	0	0	0	0	0	0	0	0	0	0	0	0	0	1	1	0	2	0	1	0	0	0	1	1	0	0	0	0	0	1
chr01_71843965	chr01	71843965	solcap_snp_c2_17156	3	4	2	2	1	1	1	1	2	1	0	2	2	1	1	2	1	2	1	3	2	2	1	1	3	3	2	1	2	1	1	1	2	2	2	1	1	0	2	2	1	1	4	1	0	3
chr01_71865542	chr01	71865542	candidate_SNP:71865541-71865542	1	0	1	0	0	0	0	0	0	0	0	2	0	0	0	0	0	0	0	0	0	0	0	0	0	0	0	0	0	1	0	0	1	0	1	0	0	0	0	1	0	0	0	0	0	1
chr01_71867566	chr01	71867566	ST4.03ch01_70773949	4	4	4	4	4	4	4	4	4	4	4	4	4	4	4	4	4	4	4	4	4	4	4	4	4	4	4	4	4	4	4	4	4	4	4	4	4	4	4	4	4	4	4	4	4	4
chr01_71876763	chr01	71876763	candidate_SNP:71876762-71876763	3	4	4	4	3	3	4	3	4	4	3	4	3	3	3	4	4	4	1	4	4	3	4	4	4	4	4	4	4	3	3	3	4	4	4	4	4	4	4	4	4	4	4	3	3	3
chr01_71930903	chr01	71930903	solcap_snp_c2_17145	4	3	4	3	3	3	2	2	3	2	2	4	2	2	3	3	3	4	3	3	3	4	3	2	2	4	4	3	2	4	4	3	4	2	2	4	2	4	4	4	3	4	1	4	3	3
chr01_71959956	chr01	71959956	candidate_SNP:71959955-71959956	4	4	4	4	3	4	4	4	4	4	4	4	3	3	4	4	4	4	2	4	4	3	4	4	4	4	4	4	4	2	3	3	4	4	4	4	4	4	4	4	4	4	4	4	4	3
chr01_71979188	chr01	71979188	candidate_SNP:71979187-71979188	3	0	1	0	0	1	0	1	0	0	0	2	0	0	0	0	0	0	0	0	0	0	0	0	0	0	0	1	0	2	2	0	1	0	1	0	0	2	2	2	0	0	0	0	0	2
chr01_71984789	chr01	71984789	candidate_SNP:71984788-71984789	4	4	4	4	3	4	4	4	4	4	4	4	4	4	4	4	4	4	3	4	4	4	4	4	4	4	4	4	4	4	4	3	4	4	4	4	4	4	4	4	4	4	4	4	4	3
chr01_72002374	chr01	72002374	candidate_SNP:72002373-72002374	4	4	4	4	4	4	4	4	4	4	4	4	4	3	4	4	4	4	3	4	4	4	4	4	4	4	4	4	4	4	3	4	4	4	4	4	4	4	4	4	4	4	4	4	4	4
chr01_72008043	chr01	72008043	solcap_snp_c2_17185	3	4	2	2	3	3	3	3	3	3	3	3	4	3	3	2	3	2	4	3	1	3	2	1	3	3	2	3	3	2	2	2	1	2	3	1	3	1	1	3	1	2	4	2	3	4
chr01_72031984	chr01	72031984	candidate_SNP:72031983-72031984	4	4	2	2	4	3	3	3	1	2	2	4	4	3	3	2	2	3	4	3	1	3	3	1	3	3	1	2	3	3	2	4	1	3	3	1	2	0	1	3	1	2	4	3	3	4
chr01_72061304	chr01	72061304	candidate_SNP:72061303-72061304	3	4	4	4	4	4	4	4	4	4	4	3	4	4	4	4	3	4	4	4	4	4	4	4	4	4	4	4	4	3	3	4	4	4	4	4	4	4	4	3	4		4	4	4	2
chr01_72081599	chr01	72081599	candidate_SNP:72081598-72081599	2	0	1	0	0	0	0	0	0	0	0	2	0	0	0	0	0	0	0	0	0	0	0	0	0	0	0	0	0	1	1	0	1	0	1	0	0	0	1	2	0	0	0	0	0	1
chr01_72086873	chr01	72086873	solcap_snp_c2_12171	4	1	3	3	3	4	3	4	3	3	4	3	2	4	4	3	3	3	4	1	4	2	3	4	3	1	4	2	4	4	4	4	4	4	4	3	3	4	4	3	4	2	3	1	4	3
chr01_72122133	chr01	72122133	ST4.03ch01_71031355	2	4	1	3	3	2	3	3	3	3	2	1	4	3	3	1	2	2	4	3	0	3	3	1	3	3	2	2	2	1	1	2	0	3	2	2	2	1	0	2	1	3	4	4	3	3
chr01_72123981	chr01	72123981	candidate_SNP:72123980-72123981	0	4	1	2	2	2	3	2	3	3	2	1	3	2	2	2	2	1	1	3	2	2	2	1	3	2	2	3	3	0	0	1	0	2	2	1	3	1	0	2	2	1	4	2	1	2
chr01_72126298	chr01	72126298	solcap_snp_c1_3901	2	4	2	2	2	2	4	2	3	3	2	3	3	2	2	2	2	2	1	3	2	2	2	1	3	3	2	3	3	1	2	2	1	3	3	2	3	1	2	4	2	3	4	3	1	3
chr01_72171109	chr01	72171109	solcap_snp_c2_12204	2	3	2	1	2	1	1	1	1	2	0	3	2	0	1	1	2	2	1	2	0	3	1	0	2	3	0	1	0	1	1	1	1	0	1	1	1	2	1	3	0	4	1	2	0	3
chr01_72173564	chr01	72173564	candidate_SNP:72173563-72173564	3	3	2	1	2	1	2	2	1	2	1	3	2	1	3	1	2	2	3	2	0	2	1	0	1	3	0	1	0	1	2	1	1	0	1	2	1	2	1	3	0	4	1	3	2	2
chr01_72177579	chr01	72177579	candidate_SNP:72177578-72177579	3	4	4	4	4	3	4	3	4	4	2	4	3	3	3	4	4	4	3	4	4	3	4	4	4	4	4	4	4	3	3	4	4	4	4	4	4	4	4	4	4	4	4	3	2	4
chr01_72234985	chr01	72234985	ST4.03ch01_71143445	2	0	2	0	0	1	0	1	0	1	0	2	0	0	1	0	1	1	0	0	0	0	0	0	0	1	0	0	0	1	1	0	1	0	1	0	0	2	1	2	0	1	1	1	0	1
chr01_72281000	chr01	72281000	candidate_SNP:72280999-72281000	3	4	4	4	3	3	4	3	4	4	3	4	3	3	3	4	4	4	1	4	4	3	4	4	4	4	4	4	4	3	3	3	4	4	4	4	4	4	4	4	4	4	4	3	2	3
chr01_72283752	chr01	72283752	solcap_snp_c2_12088	4	3	3	2	3	3	3	3	2	4	2	3	4	2	2	1	3	1	2	3	0	3	1	1	2	3	1	4	2	3	3	0	3	1	2	1	4	3	3	3	0	3	1	4	1	3
chr01_72285590	chr01	72285590	candidate_SNP:72285589-72285590	4	4	4	4	3	4	4	4	4	3	4	4	4	4	4	4	3	2	4	3	4	4	4	4	4	3	4	4	4	4	4	4	4	4	4	4	3	2	4	4	4	3	3	4	4	4
chr01_72287346	chr01	72287346	candidate_SNP:72287345-72287346	4	4	4	4	4	3	4	3	4	4	3	4	4	4	4	4	4	4	4	4	4	4	4	4	4	4	4	4	4	4	4	4	4	4	4	4	4	4	4	4	4	4	4	3	3	4
chr01_72315941	chr01	72315941	solcap_snp_c2_12093	4	3	2	1	2	3	3	3	2	3	2	3	4	3	2	2	2	1	3	2	0	3	1	1	1	2	2	4	3	3	3	0	2	1	2	1	2	1	2	3	0	2	1	2	1	4
chr01_72328200	chr01	72328200	solcap_snp_c2_12098	4	3	2	1	4	4	2	4	2	4	3	3	4	2	3	1	3	2	2	3	0	3	1	1	2	3	2	4	2	3	3	2	2	1	2	1	4	3	3	3	0	3	2	4	2	4
chr01_72333133	chr01	72333133	ST4.03ch01_71234851	4	3	1	1	4	4	3	4	2	4	3	2	4	2	3	1	3	2	3	3	0	3	1	1	1	3	2	4	2	3	3	1	2	1	2	1	4	3	3	3	0	3	2	4	3	4
chr01_72335345	chr01	72335345	ST4.03ch01_71237063	4	3	2	1	2	2	3	3	2	3	2	3	4	2	1	1	2	1	3	2	0	3	1	1	1	2	2	4	2	3	3	0	2	1	2	1	3	1	3	3	0	2	1	3	1	4
chr01_72337680	chr01	72337680	solcap_snp_c1_3867	4	2	2	1	2	3	3	3	2	3	3	3	4	2	1	1	2	1	3	2	0	3	1	1	1	2	2	4	3	3	3	0	2	1	2	1	3	2	3	3	0	2	1	3	1	4
chr01_72337941	chr01	72337941	solcap_snp_c1_3868	4	3	2	1	3	3	3	3	2	3	2	3	4	2	1	1	2	1	3	2	0	3	1	1	1	2	2	4	2	3	3	0	2	2	2	1	3	1	3	3	0	2	1	3	1	4
chr01_72339947	chr01	72339947	candidate_SNP:72339946-72339947	4	4	4	4	3	4	4	3	4	4	4	4	4	4	4	4	4	4	4	4	4	4	4	4	4	4	4	4	4	4	4	3	4	4	4	4	4	4	4	4	4	4	4	4	4	4
chr01_72341495	chr01	72341495	candidate_SNP:72341494-72341495	4	4	4	4	3	3	4	3	4	4	3	4	4	4	3	4	4	4	4	4	4	4	4	4	4	4	4	4	4	4	4	3	4	4	4	4	4	4	4	4	4	4	4	3	2	4
chr01_72384868	chr01	72384868	solcap_snp_c1_3874	4	3	1	1	2	3	3	4	1	4	2	3	4	1	2	1	3	2	3	3	0	3	1	1	2	2	3	3	0	3	4	0	2	1	2	1	4	2	3	2	0	3	2	4	2	4
chr01_72385715	chr01	72385715	ST4.03ch01_71272370	4	3	2	1	2	3	3	3	2	2	2	3	4	2	1	1	2	1	3	2	0	3	1	1	1	2	2	4	3	3	3	0	2	1	2	1	3	1	3	3	0	2	1	3	1	4
chr01_72407197	chr01	72407197	candidate_SNP:72407196-72407197	4	4	4	4	4	4	4	4	4	4	3	4	4	4	4	4	4	4	4	4	4	4	4	4	4	4	4	4	4	4	4	4	4	4	4	4	4	4	4	4	4	4	4	4	4	4
chr01_72409600	chr01	72409600	candidate_SNP:72409599-72409600	4	4	4	4	3	4	4	4	4	4	4	4	4	4	4	4	4	4	4	4	4	4	4	4	4	4	4	4	4	4	4	3	4	4	4	4	4	4	4	4	4	4	4	4	4	4
chr01_72413098	chr01	72413098	solcap_snp_c2_12107	3	2	3	1	2	2	3	3	2	3	2	3	4	1	1	1	2	1	3	2	0	2	1	1	1	2	2	4	2	2	2	0	1	1	2	1	3	1	1	3	0	1	1	3	1	4
chr01_72428411	chr01	72428411	solcap_snp_c2_12111	3	3	1	1	2	3	3	3	2	3	1	3	4	2	1	1	2	1	3	2	0	3	1	1	1	2	2	4	2	2	2	0	1	1	1	2	3	1	1	3	0	2	2	3	1	4
chr01_72436944	chr01	72436944	solcap_snp_c2_12113	4	3	3	2	4	4	4	4	3	4	4	4	4	4	3	1	4	2	3	3	2	4	2	2	3	3	4	4	2	4	4	3	3	2	3	2	4	4	4	3	1	4	2	4	3	4
chr01_72442390	chr01	72442390	candidate_SNP:72442389-72442390	4	3	3	1	3	2	4	3	3	4	3	4	4	3	2	1	4	3	3	4	1	4	3	1	2	3	4	4	3	4	4	2	2	2	3	2	4	4	4	3	2	4	2	3	1	4
chr01_72451931	chr01	72451931	solcap_snp_c2_12116	4	4	2	4	4	4	3	4	2	4	2	3	4	3	4	4	3	4	4	4	2	3	2	4	3	4	2	4	4	3	2	2	4	2	3	3	4	3	2	4	2	2	4	4	4	4
chr01_72452767	chr01	72452767	candidate_SNP:72452766-72452767	4	4	4	4	4	4	4	4	4	4	3	4	4	4	4	4	4	4	4	4	4	4	4	4	4	4	4	4	4	4	4	4	4	4	4	4	4	4	4	4	4	4	4	4	4	4
chr01_72453730	chr01	72453730	candidate_SNP:72453729-72453730	3	3	2	1	4	3	4	4	2	4	4	4	4	3	3	2	4	3	3	2	1	4	3	3	1	3	4	4	2	4	4	3	1	1	3	1	4	4	4	3	2	4	4	4	3	4
chr01_72461582	chr01	72461582	candidate_SNP:72461581-72461582	4	4	4	4	4	3	4	3	4	4	3	4	4	4	3	4	4	4	4	4	4	4	4	4	4	4	4	4	4	4	4	4	4	4	4	4	4	4	4	4	4	4	4	3	2	4
chr01_72465583	chr01	72465583	candidate_SNP:72465582-72465583	4	4	3	4	4	4	2	4	3	4	4	3	4	3	4	4	3	4	4	4	3	3	3	4	3	4	4	4	4	3	4	3	4	2	3	4	4	3	3	4	3	2	4	4	4	4
chr01_72485798	chr01	72485798	solcap_snp_c1_3892	4	4	3	0	4	4	3	4	2	4	4	1	4	2	4	1	3	2	3	4	2	3	2	2	1	3	4	4	2	3	3	2	3	1	2	2	4	3	3	1	0	3	1	4	1	4
chr01_72556018	chr01	72556018	solcap_snp_c1_3895	4	3	3	2	4	4	4	4	3	4	4	3	4	3	3	1	4	2	3	4	2	4	3	2	2	4	4	4	2	4	4	3	2	2	3	3	4	4	4	2	2	4	2	4	3	4
chr01_72558384	chr01	72558384	candidate_SNP:72558383-72558384	4	3	3	1	4	2	4	4	3	4	3	3	4	3	3	2	4	2	3	2	2	4	3	1	2	3	4	4	3	4	4	3	3	2	3	3	4	4	4	3	2	4	2	3	1	4
chr01_72562350	chr01	72562350	solcap_snp_c2_12125	4	3	2	1	3	3	3	2	2	3	1	2	4	2	1	1	2	1	2	2	0	3	1	2	1	2	2	4	2	3	3	0	2	1	2	1	3	1	3	3	0	2	1	3	1	4
chr01_72562642	chr01	72562642	solcap_snp_c2_12126	4	4	3	4	3	4	2	4	3	4	4	3	4	3	4	4	3	4	4	4	2	3	4	4	3	4	4	4	4	2	3	3	4	2	3	4	4	3	3	4	2	2	4	4	4	4
chr01_72611181	chr01	72611181	candidate_SNP:72611180-72611181	4	4	4	4	4	3	4	3	4	4	3	4	4	4	3	4	4	4	4	4	4	4	4	4	4	4	4	4	4	4	4		4	4	4	4	4	4	4	4	NA	4	4	3	2	4
chr01_72618113	chr01	72618113	PotVar0006158	4	3	3	2	4	4	4	4	3	4	4	3	4	3	3	1	4	2	2	3	2	4	2	1	2	3	4	4	3	4	4	3	3	3	3	3	4	4	4	3	2	3	2	4	4	4
chr01_72620336	chr01	72620336	PotVar0006168	4	4	4	4	4	3	4	3	4	4	3	4	4	4	2	4	4	4	4	4	4	4	4	4	4	4	4	4	4	4	4	4	4	4	4	4	4	4	4	4	4	4	4	3	3	4
chr01_72621618	chr01	72621618	PotVar0006198	4	4	3	4	4	2	2	3	3	4	4	3	4	3	4	4	2	4	4	4	2	3	4	2	3	4	4	4	3	3	2	3	4	2	3	4	4	3	2	4	2	2	4	4	4	4
chr01_72622613	chr01	72622613	PotVar0006243	4	3	3	1	3	3	3	2	3	3	1	2	4	2	1	2	3	2	4	2	0	3	2	0	1	3	2	4	1	3	3	0	2	0	2	1	3	1	3	3	0	1	2	2	2	4
chr01_72622672	chr01	72622672	PotVar0006246	4	4	4	4	3	4	4	4	4	3	2	4	4	4	2	4	4	4	4	3	3	4	2	4	4	3	2	4	4	4	4	3	4	4	4	3	3	2	4	4	4	3	3	4	4	4
chr01_72651987	chr01	72651987	candidate_SNP:72651986-72651987	4	4	3	4	3	2	3	2	3	3	2	3	4	3	3	4	1	3	4	3	2	3	3	3	2	3	2	4	3	3	3	2	4	3	3	3	3	1	2	4	2	2	3	4	4	4
chr01_72693590	chr01	72693590	candidate_SNP:72693589-72693590	4	4	4	4	3	4	4	4	4	3	2	4	4	4	3	4	3	2	4	3	2	4	3	4	4	3	3	4	4	4	4	3	4	4	4	2	3	2	4	4	4	3	3	4	4	4
chr01_72786270	chr01	72786270	candidate_SNP:72786269-72786270	4	3	2	2	4	2	3	3	2	4	4	2	4	2	3	2	3	3	2	3	2	3	2	1	2	3	4	3	1	3	3	2	3	1	2	3	4	3	2	3	1	3	2	4	4	4
chr01_72787721	chr01	72787721	candidate_SNP:72787720-72787721	2	2	2	4	2	2	1	3	2	1	2	3	0	2	2	4	2	3	2	3	4	2	3	4	2	2	1	3	3	1	1	4	3	3	2	4	1	3	4	2	4	3	3	2	2	0
chr01_72811176	chr01	72811176	candidate_SNP:72811175-72811176	4	4	4	4	4	3	4	3	4	4	3	4	4	4	3	4	4	4	4	4	4	4	4	4	4	4	4	4	4	4	4	4	4	4	4	4	4	4	4	4	4	4	4	3	2	4
chr01_72821560	chr01	72821560	candidate_SNP:72821559-72821560	4	4	4	4	4	3	4	3	4	4	3	4	4	4	3	4	4	4	4	4	4	4	4	4	4	4	4	4	4	4	4	4	4	4	4	4	4	4	4	4	4	4	4	3	2	4
chr01_72822688	chr01	72822688	solcap_snp_c2_12157	4	3	3	1	4	4	3	4	3	4	3	4	4	3	3	3	4	3	3	3	2	4	2	2	2	4	3	2	2	4	4	3	3	3	3	3	4	4	4	3	3	3	3	3	3	4
chr01_72824922	chr01	72824922	solcap_snp_c1_3922	4	3	3	1	4	3	2	2	3	4	4	2	4	3	4	1	2	3	4	4	3	3	4	2	3	2	4	3	2	3	2	3	3	3	2	3	4	3	3	2	1	2	4	3	3	4
chr01_72827846	chr01	72827846	solcap_snp_c1_3925	3	3	2	3	3	3	3	3	3	4	4	3	4	3	4	2	3	3	4	4	3	3	4	2	3	2	4	3	3	2	2	2	2	3	3	3	4	3	1	3	1	3	4	3	3	4
chr01_72891195	chr01	72891195	candidate_SNP:72891194-72891195	4	3	2	3	4	3	3	3	4	4	4	2	4	3	4	2	2	3	4	4	3	3	4	2	2	2	4	3	2	3	3	2	3	1	1	2	4	3	3	3	2	3	4	3	3	4
chr01_72899579	chr01	72899579	solcap_snp_c1_3928	4	3	4	3	3	3	4	3	3	3	3	3	4	4	3	3	3	3	4	3	3	4	3	3	4	3	3	3	3	3	3	3	3	3	4	3	3	3	3	3	3	3	3	3	3	4
chr01_72899704	chr01	72899704	PotVar0006273	3	4	3	4	4	3	3	3	4	4	3	4	4	3	3	4	3	4	4	4	4	3	4	4	4	4	4	4	4	3	3	3	3	4	3	4	4	3	3	4	4	4	4	3	2	4
chr01_72923180	chr01	72923180	candidate_SNP:72923179-72923180	4	4	4	4	4	4	4	4	4	4	4	4	4	4	4	4	4	4	4	4	4	4	4	4	4	4	4	4	4	4	4	3	4	4	4	4	4	4	4	4	4	4	4	4	4	4
chr01_72924793	chr01	72924793	candidate_SNP:72924792-72924793	2	1	1	4	0	1	1	1	3	0	0	1	0	1	1	4	1	2	0	1	4	0	0	4	2	2	1	2	2	3	2	3	2	3	2	4	0	1	3	2	4	2	1	2	2	0
chr01_72969951	chr01	72969951	ST4.03ch01_71866131	4	4	4	4	3	4	4	4	4	3	2	4	4	4	3	4	3	4	4	3	3	4	3	4	4	4	3	4	4	4	4	3	4	4	4	3	3	2	4	4	4	4	3	4	4	4
chr01_72970866	chr01	72970866	solcap_snp_c1_3936	4	2	1	1	4	1	3	4	2	4	4	3	4	1	4	0	3	3	4	4	3	2	4	4	2	2	4	3	4	3	2	3	4	3	3	1	4	3	3	3	0	3	4	2	2	4
chr01_73049586	chr01	73049586	candidate_SNP:73049585-73049586	4	4	3	3	4	4	4	4	3	4	4	4	4	3	3	3	4	3	3	4	3	4	3	3	3	4	4	3	3	4	4	3	3	3	3	3	4	4	4	3	3	4	3	4	4	4
chr01_73060791	chr01	73060791	candidate_SNP:73060790-73060791	4	4	4	4	4	3	4	2	4	4	3	4	4	4	3	4	4	4	4	4	4	4	4	4	4	4	4	4	4	4	4	4	4	4	4	4	4	4	4	4	4	4	4	3	2	4
chr01_73076873	chr01	73076873	solcap_snp_c1_3945	4	0	3	1	2	1	2	1	1	3	1	4	2	3	1	1	2	2	2	0	1	3	0	2	1	2	2	1	2	3	3	1	3	0	3	0	2	1	2	3	1	1	0	2	3	2
chr01_73134392	chr01	73134392	candidate_SNP:73134391-73134392	4	2	4	4	2	4	2	4	4	3	4	4	2	4	4	4	4	3	4	3	4	3	3	4	4	3	4	4	4	4	4	4	4	3	4	4	3	4	4	4	4	4	3	3	4	3
chr01_73148190	chr01	73148190	candidate_SNP:73148189-73148190	4	4	4	4	4	3	4	3	4	4	2	4	4	4	3	4	4	4	4	4	4	4	4	4	4	4	4	4	4	4	4	4	4	4	4	4	4	4	4	4	4	4	4	3	3	4
chr01_73152048	chr01	73152048	ST4.03ch01_72051151	3	4	4	3	4	4	4	4	4	4	4	3	4	4	4	3	4	3	4	4	3	4	4	2	4	3	4	4	3	3	3	4	2	4	4	4	4	4	2	4	3	4	4	4	3	4
chr01_73152075	chr01	73152075	ST4.03ch01_72051178	3	0	3	0	1	1	2	1	1	2	1	3	2	3	1	0	3	1	2	0	0	3	0	0	1	1	2	1	1	2	2	1	1	0	3	0	2	1	1	3	0	1	0	2	1	2
chr01_73152426	chr01	73152426	solcap_snp_c2_12216	4	0	2	0	1	1	1	1	1	2	1	3	3	2	1	0	2	0	2	0	0	2	0	0	1	2	1	1	2	2	2	2	1	0	3	0	1	1	1	3	1	1	0	2	1	2
chr01_73152453	chr01	73152453	solcap_snp_c2_12217	4	2	3	1	4	3	4	2	1	3	2	4	4	3	2	1	2	2	3	3	1	4	2	2	2	4	2	1	2	3	3	2	3	2	3	0	3	1	2	3	1	1	1	4	4	3
chr01_73169145	chr01	73169145	candidate_SNP:73169144-73169145	4	2	4	4	2	4	2	4	4	3	4	4	2	4	4	4	4	3	4	2	4	3	2	4	4	3	4	4	4	4	4	4	4	3	4	4	3	4	4	4	4	4	3	4	4	2
chr01_73186396	chr01	73186396	candidate_SNP:73186395-73186396	3	4	4	2	3	3	4	3	4	4	3	3	4	4	3	3	4	2	4	4	3	4	4	2	4	3	4	4	3	3	3	3	3	4	4	4	4	4	2	4	4	4	4	3	2	4
chr01_73194361	chr01	73194361	solcap_snp_c1_3846	3	4	4	3	4	4	4	4	4	4	4	3	4	4	4	3	4	3	4	4	3	4	4	2	4	3	4	4	3	3	3	3	2	4	4	4	4	4	2	4	3	4	4	4	3	4
chr01_73201006	chr01	73201006	solcap_snp_c2_12078	4	2	3	1	4	3	4	3	1	3	2	4	4	3	2	1	2	3	3	2	1	4	1	2	1	3	2	2	2	3	3	2	3	1	3	0	3	2	3	3	1	1	1	4	4	4
chr01_73209144	chr01	73209144	solcap_snp_c1_3848	3	1	3	0	4	1	4	1	1	3	1	3	4	3	1	0	2	2	1	2	0	4	1	0	1	3	2	1	1	2	2	3	1	1	3	0	3	1	2	3	0	1	1	2	1	3
chr01_73212845	chr01	73212845	solcap_snp_c1_3851	3	1	3	0	4	2	4	1	1	2	1	3	4	3	1	0	2	2	1	2	0	4	2	0	1	2	1	1	1	2	2	2	1	2	2	0	2	1	1	3	0	1	1	2	1	3
chr01_73212855	chr01	73212855	solcap_snp_c1_3852	3	1	3	0	4	2	4	1	1	2	1	3	4	3	1	0	2	2	1	2	0	4	2	0	1	2	1	1	1	2	2	2	1	2	2	0	2	1	1	3	0	1	1	2	1	3
chr01_73213326	chr01	73213326	solcap_snp_c1_3853	3	4	4	3	4	4	4	4	4	4	4	3	4	4	4	3	4	3	4	4	3	4	4	3	4	3	4	4	2	3	2	4	2	4	4	4	4	4	2	4	3	4	4	4	3	4
chr01_73252559	chr01	73252559	candidate_SNP:73252558-73252559	0	2	0	2	0	2	1	2	1	2	3	0	0	0	0	2	3	0	2	1	2	0	2	0	2	1	2	3	0	0	0	1	0	1	0	2	1	3	1	0	1	3	2	1	0	1
chr01_73308797	chr01	73308797	ST4.03ch01_72208145	1	4	4	4	3	2	3	1	3	2	2	3	2	2	2	4	2	3	1	4	4	2	4	4	4	2	2	3	4	2	2	4	3	4	2	4	2	4	3	2	4	4	4	2	1	2
chr01_73343969	chr01	73343969	candidate_SNP:73343968-73343969	4	4	4	4	4	4	4	4	4	4	4	4	4	4	4	4	4	4	4	4	4	4	4	4	4	4	4	4	4	4	4	4	4	4	4	4	4	4	4	4	4	4	4	3	4	4
chr01_73355974	chr01	73355974	candidate_SNP:73355973-73355974	4	4	4	4	4	3	4	3	4	4	3	4	4	4	3	4	3	4	4	4	4	4	4	4	4	4	4	4	4	4	4	4	4	4	4	4	4	4	4	4	4	4	4	2	1	4
chr01_73371756	chr01	73371756	solcap_snp_c2_31779	0	3	3	2	2	1	3	0	1	1	0	1	2	2	1	1	1	2	1	3	1	2	3	2	3	1	0	1	2	1	1	2	1	3	2	2	1	1	1	2	1	0	3	3	0	0
chr01_73381962	chr01	73381962	solcap_snp_c2_31783	3	4	4	3	4	4	4	4	4	4	4	3	4	4	4	3	4	3	4	4	3	4	4	2	4	3	4	4	3	3	3	4	2	4	4	4	4	4	3	4	3	4	4	4	3	4
chr01_73384006	chr01	73384006	ST4.03ch01_72284481	3	4	4	1	4	4	4	4	4	4	4	3	4	4	4	3	4	3	4	4	4	4	4	2	4	2	4	4	3	3	3	4	2	4	4	4	4	4	3	4	3	4	4	4	4	4
chr01_73390269	chr01	73390269	ST4.03ch01_72290744	4	4	4	4	4	3	3	3	4	1	3	4	2	3	3	4	3	3	2	4	4	2	4	4	4	3	1	3	4	3	3	4	4	4	3	4	3	4	4	4	4	4	4	4	3	3
chr01_73390356	chr01	73390356	ST4.03ch01_72290831	3	4	4	4	4	4	4	4	4	4	4	3	4	4	4	4	4	3	4	4	3	4	4	2	4	3	4	4	4	4	2	4	4	4	4	4	4	4	2	4	3	4	4	4	3	4
chr01_73409786	chr01	73409786	candidate_SNP:73409785-73409786	4	4	4	4	3	4	4	4	4	4	4	4	4	4	4	4	4	4	4	4	4	4	4	4	4	4	4	4	4	4	4	3	4	4	4	4	4	4	4	4	4	4	4	4	4	4
chr01_73424794	chr01	73424794	candidate_SNP:73424793-73424794	2	4	4	4	4	4	4	4	3	4	4	3	4	4	4	4	4	4	4	4	4	4	4	4	4	4	4	4	4	3	3	4	3	4	3	4	4	4	3	3	4	4	4	4	4	4
chr01_73451162	chr01	73451162	candidate_SNP:73451161-73451162	4	4	4	3	4	2	4	3	3	3	1	4	4	4	3	3	2	4	4	3	3	4	3	4	3	3	2	2	4	4	4	3	4	3	4	1	3	1	3	4	1	2	1	4	4	2
chr01_73458368	chr01	73458368	candidate_SNP:73458367-73458368	4	4	4	4	4	4	4	4	4	4	4	4	4	4	4	4	4	4	4	4	4	4	4	4	4	4	4	4	4	4	4	4	4	4	4	4	4	4	4	4	4	4	4	4	4	4
chr01_73470044	chr01	73470044	ST4.03ch01_72373974	1	0	0	0	1	1	0	1	0	0	1	0	0	0	1	0	0	0	0	0	0	0	0	0	0	0	0	0	0	1	1	1	1	0	0	0	0	0	2	0	0	1	1	3	2	0
chr01_73486016	chr01	73486016	candidate_SNP:73486015-73486016	3	4	4	4	4	2	3	3	3	2	3	4	2	3	3	4	2	3	2	4	4	2	4	4	4	3	2	2	4	3	2	4	4	4	3	4	3	4	3	4	4	4	4	4	3	3
chr01_73487452	chr01	73487452	ST4.03ch01_72391316	1	0	0	0	1	1	0	1	0	0	1	0	0	0	1	0	0	0	0	0	0	0	0	0	0	0	0	0	0	1	1	1	1	0	0	0	0	0	2	0	0	1	1	3	2	0
chr01_73488820	chr01	73488820	ST4.03ch01_72392684	4	4	4	4	4	3	4	3	4	4	3	4	4	4	3	4	4	4	4	4	4	4	4	4	4	4	4	4	4	4	4	4	4	4	4	4	4	4	4	4	4	4	4	3	2	4
chr01_73494179	chr01	73494179	solcap_snp_c2_31802	2	4	4	4	4	3	3	3	3	2	4	4	2	2	4	4	3	3	3	4	4	2	4	4	4	3	1	4	4	3	3	4	4	4	2	4	1	4	2	4	4	4	4	4	3	4
chr01_73515752	chr01	73515752	solcap_snp_c2_31804	1	2	0	1	0	4	0	4	2	1	4	0	0	1	2	1	2	0	2	1	2	0	1	0	1	1	4	3	0	1	1	2	1	1	0	3	2	3	3	0	1	3	2	3	3	3
chr01_73587937	chr01	73587937	solcap_snp_c1_9571	4	3	4	2	4	2	4	2	3	3	2	2	4	4	2	2	2	3	4	3	1	4	3	2	3	2	2	3	4	4	4	3	2	3	4	2	3	3	4	3	2	3	3	3	1	4
chr01_73596787	chr01	73596787	candidate_SNP:73596786-73596787	4	0	1	1	2	4	1	4	3	2	2	4	2	2	2	1	2	2	2	0	1	1	0	1	1	1	2	1	0	3	2	1	3	0	2	0	1	1	4	2	1	2	2	4	4	2
chr01_73598397	chr01	73598397	candidate_SNP:73598396-73598397	4	4	4	3	4	4	4	4	4	4	4	2	4	4	4	3	4	2	4	4	3	4	4	3	4	3	4	4	4	4	4	4	3	4	4	4	4	4	4	3	3	4	4	3	3	4
chr01_73599299	chr01	73599299	solcap_snp_c1_9573	4	1	1	2	2	4	1	4	3	3	4	4	2	1	3	2	3	3	3	1	3	1	1	1	1	3	4	3	0	3	3	2	3	1	2	2	2	3	4	3	3	3	2	4	4	1
chr01_73617581	chr01	73617581	candidate_SNP:73617580-73617581	4	4	4	4	4	3	4	3	4	4	3	4	4	4	3	4	4	4	4	4	4	4	4	4	4	4	4	4	4	4	4	4	4	4	4	4	4	4	4	4	4	4	4	3	2	4
chr01_73621616	chr01	73621616	solcap_snp_c2_31820	4	2	4	3	4	4	4	4	4	3	2	4	4	4	3	3	3	4	4	3	2	4	3	4	4	3	2	3	4	4	4	3	4	3	4	2	3	2	4	4	2	2	3	4	4	4
chr01_73623928	chr01	73623928	candidate_SNP:73623927-73623928	4	4	4	4	4	3	4	3	4	4	3	4	4	4	3	4	4	4	4	4	4	4	4	4	4	4	4	4	4	4	4	4	4	4	4	4	4	4	4	4	4	4	4	3	3	4
chr01_73624408	chr01	73624408	solcap_snp_c2_31821	4	0	1	0	1	2	1	3	3	3	1	2	2	1	2	0	2	1	2	0	0	1	0	0	1	1	2	2	0	3	3	0	1	0	2	0	1	1	4	2	0	1	1	2	1	2
chr01_73634013	chr01	73634013	solcap_snp_c1_9587	4	3	4	3	4	4	4	4	4	4	3	4	4	4	3	3	3	4	4	2	3	4	4	4	4	3	2	3	4	4	4	2	4	4	4	2	3	3	4	4	2	1	3	4	4	4
chr01_73638321	chr01	73638321	solcap_snp_c2_31824	4	3	4	2	3	3	4	2	4	3	1	2	4	4	2	2	3	3	4	3	2	4	3	2	4	2	2	3	4	4	4	3	3	3	4	2	3	2	4	3	1	2	3	2	1	4
chr01_73639192	chr01	73639192	candidate_SNP:73639191-73639192	4	1	1	1	2	3	1	3	3	3	3	2	2	1	2	1	3	1	3	1	2	1	1	0	1	2	4	3	0	3	3	2	2	1	2	2	2	3	4	2	2	3	2	3	1	2
chr01_73645113	chr01	73645113	solcap_snp_c2_31836	4	0	1	0	2	3	2	3	3	2	1	2	1	1	1	0	2	2	3	0	0	1	0	0	1	2	2	2	0	3	3	1	3	0	2	0	1	1	3	3	1	1	1	3	1	2
chr01_73646121	chr01	73646121	ST4.03ch01_72553083	3	2	2	1	2	3	1	3	2	2	1	2	1	1	1	2	3	0	2	1	2	0	1	0	0	2	4	3	0	1	2	3	2	1	2	2	1	2	4	1	2	3	2	3	1	1
chr01_73646194	chr01	73646194	ST4.03ch01_72553156	4	2	4	3	4	4	4	4	4	3	3	4	4	4	3	2	4	4	4	3	2	4	2	4	4	4	3	3	4	4	4	2	4	3	4	2	3	3	4	4	2	1	3	4	4	4
chr01_73651980	chr01	73651980	candidate_SNP:73651979-73651980	4	3	4	2	3	3	4	3	4	3	3	4	4	4	2	1	3	3	4	4	1	4	4	4	4	3	2	3	4	4	4	2	3	3	4	1	3	3	4	3	1	3	3	2	1	4
chr01_73668795	chr01	73668795	candidate_SNP:73668794-73668795	4	4	4	3	4	4	4	4	3	4	4	3	4	4	4	3	4	3	4	4	4	4	4	4	4	4	4	4	4	4	4	4	3	4	4	4	4	4	4	4	3	4	4	3	3	4
chr01_73672780	chr01	73672780	candidate_SNP:73672779-73672780	4	4	4	3	4	4	4	4	4	4	4	3	4	4	4	3	4	3	4	4	3	4	4	3	4	3	4	4	4	4	4	4	3	4	4	4	4	4	4	3	4	4	4	4	3	4
chr01_73683193	chr01	73683193	candidate_SNP:73683192-73683193	4	4	4	4	4	3	4	3	4	4	3	3	4	4	3	4	4	4	4	4	4	4	4	4	4	4	4	4	4	4	4	4	4	4	4	4	4	4	4	4	4	4	4	3	2	4
chr01_73690652	chr01	73690652	solcap_snp_c2_31850	1	1	0	2	1	1	0	1	0	1	3	1	0	0	2	2	1	1	1	1	3	0	1	1	0	1	2	1	0	2	1	3	2	1	0	2	1	2	2	2	3	3	2	3	3	0
chr01_73704783	chr01	73704783	candidate_SNP:73704782-73704783	4	4	4	3	4	4	4	4	4	4	4	3	4	4	4	3	4	3	4	4	3	4	4	3	4	3	4	4	4	4	4	4	2	4	4	4	4	4	4	3	3	4	4	3	3	4
chr01_73715438	chr01	73715438	candidate_SNP:73715437-73715438	2	0	1	0	0	1	0	1	1	0	0	2	0	0	0	0	0	0	1	0	0	0	0	0	0	0	0	1	0	1	1	0	1	0	1	0	0	1	1	2	0	1	1	2	0	2
chr01_73771954	chr01	73771954	candidate_SNP:73771953-73771954	4	4	4	4	4	3	4	3	4	4	4	3	4	4	3	4	4	4	4	4	4	4	4	4	4	4	4	4	4	4	4	4	4	4	4	4	4	4	4	4	4	4	4	4	3	4
chr01_73801596	chr01	73801596	candidate_SNP:73801595-73801596	4	2	1	1	2	4	1	4	3	3	3	4	2	0	3	1	3	3	4	2	2	2	0	1	1	4	4	4	0	2	2		2	0	1	1	3	2	4	4	2	1	2	3	4	2
chr01_73807190	chr01	73807190	candidate_SNP:73807189-73807190	3	2	4	4	3	1	3	1	3	2	4	4	1	3	3	4	3	2	1	4	4	3	4	4	2	2	2	2	4	3	3	4	4	3	4	4	3	3	3	4	4	3	2	2	3	3
chr01_73814220	chr01	73814220	solcap_snp_c2_20065	4	3	1	2	2	4	1	4	3	3	3	4	2	1	3	2	2	3	4	1	3	1	2	1	1	4	4	3	1	3	2	3	3	3	1	2	2	3	4	4	3	2	2	2	3	2
chr01_73817538	chr01	73817538	candidate_SNP:73817537-73817538	4	4	4	4	4	4	4	4	4	4	4	4	4	4	3	4	4	4	4	4	4	4	4	4	4	4	4	4	4	4	4	4	4	4	4	4	4	4	4	4	4	4	4	4	3	4
chr01_73847739	chr01	73847739	solcap_snp_c2_19958	3	1	2	2	2	1	2	1	1	2	2	2	2	1	1	3	1	2	2	2	2	2	3	3	0	1	1	3	1	2	2	3	4	2	1	4	2	3	3	4	2	1	2	2	1	4
chr01_73851476	chr01	73851476	ST4.03ch01_72760045	3	1	3	2	0	1	2	0	2	0	0	1	0	3	1	2	1	0	2	0	1	1	2	2	2	0	0	1	3	3	3	2	2	1	4	1	0	3	3	2	1	2	1	1	0	2
chr01_73855198	chr01	73855198	candidate_SNP:73855197-73855198	4	4	4	3	4	3	4	4	4	4	4	3	4	4	3	3	4	3	4	3	3	4	4	3	4	3	4	4	4	4	4	4	3	4	4	4	4	4	4	3	3	4	4	3	3	4
chr01_73857156	chr01	73857156	solcap_snp_c1_6263	2	2	4	4	2	2	2	2	2	2	4	4	2	3	3	4	3	2	2	4	4	3	4	4	3	1	2	3	4	3	3	2	4	3	4	4	3	4	3	4	4	4	4	4	3	4
chr01_73862399	chr01	73862399	candidate_SNP:73862398-73862399	4	4	4	4	4	3	4	3	4	4	3	4	4	4	4	4	4	4	4	4	4	4	4	4	4	4	4	4	4	4	4	4	4	4	4	4	4	4	4	4	4	4	4	2	3	4
chr01_73868798	chr01	73868798	candidate_SNP:73868797-73868798	4	4	4	4	4	4	4	4	4	4	4	4	4	4	3	4	4	4	4	4	4	4	4	4	4	4	4	4	4	4	4	4	4	4	4	4	4	4	4	4	4	4	4	4	3	4
chr01_73893722	chr01	73893722	solcap_snp_c2_19968	4	2	2	3	4	3	3	3	3	4	4	4	4	2	4	3	2	4	3	2	4	3	3	3	2	4	4	2	1	1	3	2	4	3	1	4	4	2	4	4	4	2	3	3	4	3
chr01_73894325	chr01	73894325	candidate_SNP:73894324-73894325	4	3	3	3	4	4	3	4	3	4	4	4	4	2	2	3	3	4	4	3	2	2	3	2	2	4	4	4	3	3	4	4	4	3	2	4	4	3	4	4	3	3	4	3	4	4
chr01_73900773	chr01	73900773	candidate_SNP:73900772-73900773	4	4	4	3	4	2	4	2	4	4	2	3	4	4	3	3	4	3	4	3	3	4	4	3	4	3	4	3	4	4	4	4	3	4	4	4	3	3	4	3	3	4	3	2	1	3
chr01_73908116	chr01	73908116	solcap_snp_c2_19974	4	2	2	3	4	2	3	3	3	4	2	1	4	2	2	2	2	3	4	2	1	3	3	2	2	3	4	3	2	3	3	3	3	3	1	4	2	2	4	4	3	1	3	2	2	2
chr01_73911957	chr01	73911957	candidate_SNP:73911956-73911957	4	4	4	3	4	3	4	3	4	4	2	2	4	4	3	4	4	3	4	3	4	4	4	2	4	3	4	2	4	4	4	4	3	4	4	4	3	2	4	4	2	4	2	1	1	4
chr01_73915994	chr01	73915994	candidate_SNP:73915993-73915994	4	4	4	3	4	4	4	4	4	4	3	3	4	4	3	3	4	3	4	3	3	4	4	3	4	3	4	4	4	4	4	4	3	4	4	4	3	4	4	3	3	4	3	3	2	4
chr01_73927521	chr01	73927521	solcap_snp_c2_19975	4	4	2	4	4	3	3	3	4	4	3	4	4	3	4	4	2	4	4	4	4	3	4	3	3	4	4	4	3	4	4	2	4	4	3	4	4	3	4	4	4	4	4	2	3	4
chr01_73929124	chr01	73929124	ST4.03ch01_72837229	4	4	4	3	4	4	4	4	4	4	4	3	4	4	4	3	4	3	4	4	3	4	4	3	4	3	4	4	4	4	4	4	3	4	4	4	4	4	4	3	3	4	4	3	3	4
chr01_73929574	chr01	73929574	candidate_SNP:73929573-73929574	4	4	4	4	4	3	4	3	4	4	3	4	4	4	4	4	4	4	4	4	4	4	4	4	4	4	4	4	4	4	4	4	4	4	4	4	4	4	4	4	4	4	4	3	3	4
chr01_73941471	chr01	73941471	candidate_SNP:73941470-73941471	4	4	4	3	4	3	4	3	4	4	2	2	4	4	3	3	4	3	4	3	3	4	4	3	4	3	4	4	4	4	4	4	2	4	4	4	3	4	4	3	3	4	3	2	1	4
chr01_73945970	chr01	73945970	ST4.03ch01_72854294	4	4	4	3	4	4	4	4	4	4	4	3	4	4	4	4	4	3	4	4	3	4	4	3	4	3	4	4	4	4	4	4	3	4	4	4	4	4	4	3	3	4	4	3	3	4
chr01_73945977	chr01	73945977	ST4.03ch01_72854301	4	4	4	2	4	3	4	2	4	4	4	3	4	4	4	4	4	3	4	3	3	4	4	3	4	3	4	4	4	4	4	4	3	4	4	4	3	4	4	3	3	4	3	2	1	4
chr01_73961474	chr01	73961474	ST4.03ch01_72870220	4	4	4	4	4	3	4	3	4	4	2	4	4	4	3	4	4	4	4	3	4	4	4	4	4	4	4	4	4	4	4	4	4	4	4	4	3	4	4	4	4	4	3	3	2	4
chr01_74000436	chr01	74000436	candidate_SNP:74000435-74000436	4	2	2	4	1	1	2	2	2	3	4	4	3	3	3	4	2	1	2	4	4	2	4	3	1	1	2	3	3	3	4	1	4	3	2	4	3	3	4	4	4	4	4	2	2	4
chr01_74071186	chr01	74071186	candidate_SNP:74071185-74071186	3	1	2	3	3	3	2	3	1	2	4	4	1	1	2	3	1	2	2	3	2	2	3	3	0	2	2	3	2	2	2	2	4	2	2	4	3	3	4	4	3	2	3	3	3	4
chr01_74073920	chr01	74073920	solcap_snp_c2_19984	4	3	3	2	1	4	2	4	4	2	2	3	2	3	3	2	3	3	3	2	1	3	1	1	4	3	3	2	3	4	4	2	3	2	4	0	2	2	3	3	3	3	3	4	4	2
chr01_74079976	chr01	74079976	candidate_SNP:74079975-74079976	4	4	4	3	4	4	4	4	4	4	4	3	4	4	4	3	4	3	4	4	3	4	4	3	4	3	4	4	4	4	4	4	3	4	4	4	4	4	4	4	3	4	4	3	4	4
chr01_74082326	chr01	74082326	candidate_SNP:74082325-74082326	4	4	4	3	4	4	4	4	4	4	4	3	4	4	4	3	4	3	4	4	3	4	4	3	4	3	4	4	4	4	4	4	3	4	4	4	4	4	4	3	3	4	4	3	3	4
chr01_74090776	chr01	74090776	ST4.03ch01_73016098	4	4	4	4	3	4	4	4	4	4	3	3	4	4	4	4	4	4	4	3	4	4	4	4	4	4	4	4	4	4	4	3	4	4	4	4	3	4	4	4	4	4	3	4	4	4
chr01_74102215	chr01	74102215	solcap_snp_c2_19991	3	1	1	2	3	2	2	1	1	2	4	4	3	1	2	3	0	2	1	3	3	2	3	3	0	2	1	3	2	2	1	1	4	2	1	4	3	3	4	4	3	2	3	3	3	4
chr01_74132832	chr01	74132832	solcap_snp_c2_19998	2	0	0	1	2	1	0	2	2	0	1	4	0	0	2	0	0	1	0	1	1	0	0	1	0	1	0	1	0	2	2	1	3	0	1	0	1	1	3	2	1	1	2	3	2	1
chr01_74137847	chr01	74137847	solcap_snp_c2_20001	2	0	0	2	2	2	0	2	1	0	2	4	0	0	2	0	1	1	0	1	1	0	1	1	0	1	0	1	0	3	3	1	3	0	2	0	1	1	3	3	1	1	2	3	2	1
chr01_74143196	chr01	74143196	candidate_SNP:74143195-74143196	4	4	4	3	4	4	4	4	4	4	4	3	4	4	4	3	4	3	4	4	3	4	4	3	4	3	4	4	4	4	4	4	3	4	4	4	4	4	4	3	3	4	4	3	3	4
chr01_74171944	chr01	74171944	candidate_SNP:74171943-74171944	4	4	4	4	4	3	4	3	4	4	3	4	4	4	4	4	4	4	4	4	4	4	4	4	4	4	4	4	4	4	4	4	4	4	4	4	4	4	4	4	4	4	4	3	3	4
chr01_74175983	chr01	74175983	candidate_SNP:74175982-74175983	1	1	2	2	3	1	1	2	1	2	4	3	2	1	2	3	1	1	2	3	3	1	1	3	0	3	1	3	1	2	3	3	4	1	1	4	3	2	4	4	3	2	3	3	3	2
chr01_74190472	chr01	74190472	ST4.03ch01_73117238	0	0	0	0	0	0	0	0	0	0	0	0	0	0	0	0	0	0	0	0	0	0	0	0	0	0	0	1	0	0	0	0	0	0	0	0	0	0	0	0	0	0	1	1	0	0
chr01_74199199	chr01	74199199	candidate_SNP:74199198-74199199	4	4	4	4	3	4	4	4	4	4	4	3	4	4	4	4	4	4	4	4	4	4	4	4	4	4	4	4	4	4	4	3	4	4	4	4	4	4	4	4	4	4	4	4	NA	4
chr01_74253207	chr01	74253207	ST4.03ch01_73186032	4	4	4	3	4	4	4	4	4	4	4	3	4	4	4	3	4	3	4	4	3	4	4	2	4	2	4	4	4	4	4	4	2	4	4	4	4	4	4	3	3	4	4	3	3	4
chr01_74255819	chr01	74255819	ST4.03ch01_73188644	3	4	4	3	3	2	4	2	3	4	2	1	4	4	2	3	4	3	4	3	3	4	4	3	4	3	4	3	4	2	2	3	1	4	3	4	3	3	1	1	3	4	3	2	2	3
chr01_74285910	chr01	74285910	solcap_snp_c2_20030	3	1	1	3	1	2	2	2	1	1	4	4	2	0	2	2	1	3	3	3	3	0	1	2	0	2	2	2	2	2	2	2	4	2	1	4	3	3	4	4	3	2	2	3	3	1
chr01_74311673	chr01	74311673	solcap_snp_c2_20032	2	1	3	2	2	1	3	2	1	0	4	2	2	2	2	2	2	2	3	3	3	2	1	3	1	2	2	3	2	2	3	3	4	3	2	4	3	4	4	2	2	2	2	3	2	3
chr01_74318792	chr01	74318792	solcap_snp_c2_20043	0	0	0	0	0	1	0	1	1	0	0	0	0	0	0	0	0	0	0	0	0	0	0	0	0	0	0	1	0	1	2	0	1	0	1	0	0	1	1	1	0	1	1	0	0	1
chr01_74325777	chr01	74325777	candidate_SNP:74325776-74325777	4	4	1	4	4	3	1	3	4	4	1	2	3	3	1	4	3	3	3	2	2	3	4	2	4	3	3	4	3	4	4	1	2	3	3	0	3	1	3	4	3	4	3	2	1	1
chr01_74328108	chr01	74328108	solcap_snp_c1_6288	2	3	3	1	4	4	2	4	4	3	1	2	2	3	2	2	3	3	2	1	3	3	3	2	4	1	3	4	2	3	3	3	1	2	4	0	1	3	1	3	2	3	4	4	3	3
chr01_74351664	chr01	74351664	ST4.03ch01_73286782	4	4	4	4	4	4	4	4	4	4	3	2	4	4	4	3	4	3	4	3	3	4	4	3	4	3	4	4	4	4	NA	4	4	4	4	4	3	4	4	3	4	4	3	3	3	4
chr01_74354720	chr01	74354720	ST4.03ch01_73289837	0	0	0	1	1	2	0	2	1	0	2	1	0	0	1	1	0	1	0	1	1	0	0	1	0	1	0	1	0	1	1	1	2	0	1	0	1	1	1	1	1	2	2	3	3	1
chr01_74355400	chr01	74355400	ST4.03ch01_73290517	4	4	4	3	4	4	4	4	4	4	3	3	4	4	4	3	4	3	4	3	3	4	4	3	4	3	4	4	4	4	4	4	3	4	4	4	3	4	4	3	3	4	3	3	3	4
chr01_74366954	chr01	74366954	ST4.03ch01_73302037	4	4	4	4	3	4	4	4	4	4	4	3	4	4	4	4	4	4	4	4	4	4	4	4	4	4	4	4	4	4	4	3	4	4	4	4	4	4	4	4	4	4	4	4	4	4
chr01_74404151	chr01	74404151	solcap_snp_c1_6294	3	2	1	1	3	3	1	3	4	3	0	1	2	2	2	1	1	3	2	1	1	2	3	1	3	1	2	3	1	3	3	0	2	2	3	0	2	1	2	2	1	3	3	2	1	2
chr01_74408000	chr01	74408000	candidate_SNP:74407999-74408000	3	4	1	4	3	4	1	4	4	3	1	4	3	3	4	4	4	4	2	2	3	2	3	3	3	4	3	2	4	4	4	1	3	4	4	0	2	2	3	4	3	3	4	4	4	3
chr01_74441492	chr01	74441492	solcap_snp_c2_20053	2	4	1	2	2	3	1	2	4	3	0	1	2	3	3	3	3	2	2	1	3	2	3	2	3	4	1	4	3	3	3	2	2	2	3	0	2	1	2	3	1	3	4	3	1	3
chr01_74443198	chr01	74443198	candidate_SNP:74443197-74443198	4	4	4	3	4	4	4	4	4	4	4	4	4	4	4	3	4	4	4	4	4	4	4	3	4	3	4	4	4	4	4	4	3	4	3	4	4	4	4	3	3	4	4	4	2	4
chr01_74444910	chr01	74444910	ST4.03ch01_73380650	4	4	4	3	4	4	4	4	4	4	3	3	4	4	4	3	4	3	4	3	3	4	4	3	4	3	4	4	4	4	4	4	3	4	4	4	3	4	4	3	3	4	3	3	3	4
chr01_74449563	chr01	74449563	candidate_SNP:74449562-74449563	4	4	4	4	4	4	4	4	4	4	3	4	4	4	4	4	4	4	4	3	4	4	4	4	4	4	4	4	4	4	4	4	4	4	4	4	3	4	4	4	4	4	3	4	4	4
chr01_74495102	chr01	74495102	candidate_SNP:74495101-74495102	4	4	4	3	4	4	4	4	4	4	4	3	4	4	4	3	4	3	4	4	3	4	4	3	4	3	4	4	4	4	4	4	3	4	4	4	4	4	4	3	3	4	4	3	3	4
chr01_74521518	chr01	74521518	ST4.03ch01_73456429	3	1	4	1	2	2	3	2	2	2	4	3	3	3	3	2	3	1	2	4	3	3	4	4	3	0	1	3	4	3	3	3	3	3	4	3	3	4	4	3	3	4	4	3	2	4
chr01_74524882	chr01	74524882	ST4.03ch01_73459996	1	1	1	1	2	1	0	1	2	1	0	1	1	1	1	1	1	0	0	1	1	1	3	1	2	0	0	2	2	3	3	0	2	1	3	0	0	1	3	2	1	3	3	1	0	3
chr01_74524913	chr01	74524913	ST4.03ch01_73460027	3	4	1	3	3	4	1	4	4	3	0	2	2	2	3	3	2	3	2	1	2	2	3	2	3	4	2	3	2	4	4	1	3	2	3	1	1	1	3	3	2	3	3	2	4	3
chr01_74565714	chr01	74565714	solcap_snp_c2_17371	0	0	0	0	0	0	0	0	1	0	0	0	0	0	0	0	0	0	0	0	0	0	0	0	0	0	0	1	0	1	1	0	1	0	1	0	0	0	1	1	0	0	1	1	0	0
chr01_74568487	chr01	74568487	ST4.03ch01_73512807	3	1	4	2	3	2	3	2	2	2	4	3	3	3	3	2	2	1	2	4	3	3	4	2	2	0	3	3	4	2	3	2	3	3	4	3	3	4	4	3	3	4	4	3	2	4
chr01_74568859	chr01	74568859	candidate_SNP:74568858-74568859	4	4	4	4	4	3	4	3	4	4	3	3	4	4	3	4	4	4	4	4	4	4	4	4	4	4	4	4	4	4	4	4	4	4	4	4	4	4	4	4	4	4	4	3	3	4
chr01_74572984	chr01	74572984	solcap_snp_c2_17367	3	1	4	2	3	2	3	2	2	1	4	3	2	3	3	2	3	1	2	4	3	3	4	3	3	0	2	3	4	3	3	3	3	3	4	3	3	4	4	3	3	4	4	3	2	4
chr01_74577597	chr01	74577597	candidate_SNP:74577596-74577597	3	4	1	3	1	4	1	4	4	2	0	2	2	1	3	3	1	2	2	1	2	1	1	2	3	4	2	3	2	4	4	1	4	3	2	1	2	2	2	3	2	3	2	4	4	2
chr01_74590154	chr01	74590154	solcap_snp_c2_17356	3	3	1	3	4	2	3	3	3	4	4	3	4	2	3	3	3	4	4	3	3	3	3	3	1	4	4	3	2	3	3	3	4	3	2	4	4	2	4	3	3	3	3	4	4	1
chr01_74647626	chr01	74647626	ST4.03ch01_73594031	1	0	1	0	3	1	2	0	1	3	2	1	2	2	1	1	1	1	1	1	3	2	3	2	0	0	2	1	2	2	3	2	3	2	2	3	3	2	4	2	2	2	2	3	0	1
chr01_74649555	chr01	74649555	ST4.03ch01_73595960	3	1	4	2	2	1	3	1	2	2	2	2	2	3	2	2	3	1	2	3	3	3	4	3	3	0	2	3	4	3	3	2	3	3	4	3	2	4	4	3	3	3	3	2	0	4
chr01_74651501	chr01	74651501	ST4.03ch01_73597906	3	1	4	2	3	2	3	3	3	2	4	3	3	3	3	2	3	1	2	4	3	3	4	3	3	0	1	3	4	3	3	3	3	3	4	3	3	4	4	3	3	3	4	3	2	4
chr01_74672726	chr01	74672726	candidate_SNP:74672725-74672726	4	4	4	4	3	3	4	3	4	4	3	3	4	4	3	4	4	4	4	3	4	4	4	4	4	4	4	4	4	4	4	3	4	4	4	4	3	4	4	4	4	4	3	3	2	4
chr01_74674431	chr01	74674431	solcap_snp_c2_47429	4	4	3	4	4	4	1	4	4	4	4	4	4	3	4	4	4	4	4	3	4	3	4	4	3	4	4	4	4	4	4	3	4	4	3	4	4	3	4	4	4	4	4	4	4	3
chr01_74689547	chr01	74689547	candidate_SNP:74689546-74689547	2	1	4	2	3	2	4	2	3	2	4	3	1	3	3	1	3	1	2	4	2	3	4	2	3	0	2	3	4	4	3	2	3	2	3	3	3	4	4	3	2	2	4	3	1	4
chr01_74708094	chr01	74708094	ST4.03ch01_73654863	3	1	4	3	2	1	3	1	2	1	2	2	1	3	2	2	3	1	2	3	3	3	4	3	3	0	3	3	4	3	3	2	3	3	4	3	2	4	4	3	3	3	3	2	0	4
chr01_74720825	chr01	74720825	PotVar0006435	3	4	3	3	3	4	3	4	4	1	3	3	2	3	3	2	3	3	2	3	3	3	3	3	4	4	2	3	3	2	3	3	3	2	4	2	2	2	2	3	2	2	2	2	4	4
chr01_74721041	chr01	74721041	PotVar0006452	3	1	4	2	4	4	4	4	2	3	4	3	3	2	3	3	3	2	2	3	3	3	4	4	4	2	4	4	4	4	3	3	4	3	4	3	3	4	4	3	3	4	4	3	2	4
chr01_74769322	chr01	74769322	ST4.03ch01_73718686	2	0	1	1	2	0	2	0	1	2	2	1	1	1	1	1	2	1	2	2	2	2	3	2	0	0	3	2	2	1	1	1	3	2	2	3	2	1	4	2	1	1	2	1	0	1
chr01_74769337	chr01	74769337	ST4.03ch01_73718701	3	3	3	3	4	3	4	3	2	4	4	3	4	3	3	3	3	4	4	3	3	4	3	3	2	4	4	3	2	2	2	4	4	3	3	4	4	3	4	3	3	3	3	4	4	2
chr01_74769409	chr01	74769409	ST4.03ch01_73718773	3	4	2	4	4	4	3	4	3	4	4	4	4	3	4	4	4	4	4	4	4	3	4	4	3	4	4	4	4	3	3	3	2	4	2	4	4	3	1	3	4	4	4	3	4	3
chr01_74776404	chr01	74776404	ST4.03ch01_73725768	1	0	1	2	1	0	1	0	0	3	4	1	4	2	1	1	3	1	4	3	3	3	1	2	0	0	4	4	3	1	1	1	0	2	3	4	3	1	0	2	2	1	2	2	0	2
chr01_74776432	chr01	74776432	ST4.03ch01_73725796	4	0	4	2	1	1	3	1	3	3	4	3	4	4	3	1	3	1	4	4	4	4	4	3	4	0	4	4	4	4	4	2	1	3	4	4	3	4	4	4	3	2	4	4	2	4
chr01_74787173	chr01	74787173	candidate_SNP:74787172-74787173	3	4	2	4	4	3	3	3	3	4	4	4	4	4	4	4	4	4	4	4	4	3	4	4	3	4	4	2	4	3	3	3	3	4	2	4	4	2	2	3	4	4	4	4	4	2
chr01_74794275	chr01	74794275	solcap_snp_c1_14093	3	1	2	1	2	0	3	0	1	3	2	1	4	3	3	2	2	1	4	2	3	3	4	3	2	0	3	2	4	3	3	1	1	3	2	3	2	2	1	2	3	2	3	1	0	3
chr01_74808800	chr01	74808800	candidate_SNP:74808799-74808800	3	3	3	2	3	4	4	4	3	4	4	2	4	3	3	3	3	4	4	3	3	4	2	3	2	4	4	4	2	3	3	2	4	3	2	4	4	4	4	3	2	2	3	4	4	3
chr01_74816276	chr01	74816276	solcap_snp_c2_47427	3	4	4	4	4	4	4	4	4	3	3	3	1	3	3	4	3	4	1	4	2	3	3	4	4	4	1	3	4	3	3	3	4	3	4	3	4	1	3	3	3	3	4	4	4	4
chr01_74821560	chr01	74821560	candidate_SNP:74821559-74821560	4	4	4	4	4	4	4	4	4	4	3	4	4	4	4	4	4	4	4	3	4	4	4	4	4	4	4	4	4	4	4	4	4	4	4	4	3	4	4	4	4	4	3	4	4	4
chr01_74849405	chr01	74849405	solcap_snp_c2_53367	4	2	4	2	3	2	3	2	2	2	4	3	4	4	3	2	3	1	4	4	3	4	4	3	3	0	3	3	4	4	4	3	3	3	4	3	3	4	4	3	3	3	4	3	2	4
chr01_74861181	chr01	74861181	solcap_snp_c2_53357	4	1	4	2	3	2	3	2	2	2	4	3	4	4	3	2	3	1	4	4	3	4	4	3	3	0	3	3	4	4	4	3	3	3	4	3	3	4	4	3	3	3	4	3	2	4
chr01_74921456	chr01	74921456	solcap_snp_c2_53370	0	3	2	2	1	2	2	2	3	1	0	0	0	1	1	1	2	3	1	0	1	1	0	1	2	3	1	2	2	2	1	2	1	2	2	1	1	1	3	2	1	1	1	2	1	1
chr01_75009289	chr01	75009289	ST4.03ch01_73969019	4	4	4	3	3	3	4	3	4	4	2	2	4	4	3	3	4	3	4	3	3	4	4	2	4	3	4	4	4	4	4	2	2	4	4	4	3	4	4	3	2	3	2	2	2	4
chr01_75016767	chr01	75016767	candidate_SNP:75016766-75016767	4	4	4	4	4	3	4	3	4	4	3	4	4	4	3	4	4	4	4	4	4	4	4	4	4	4	4	4	4	4	4	4	4	4	4	4	4	4	4	4	4	4	4	3	2	4
chr01_75053929	chr01	75053929	solcap_snp_c2_14274	1	3	1	2	1	2	2	2	3	1	2	1	1	1	1	2	3	3	1	1	2	2	2	2	1	3	2	3	2	2	2	1	3	2	2	2	3	0	3	2	2	1	1	2	1	2
chr01_75055165	chr01	75055165	candidate_SNP:75055164-75055165	4	4	4	4	3	3	4	3	4	4	4	3	4	4	4	4	4	4	4	4	4	4	4	4	4	4	4	4	4	4	4	3	4	4	4	4	4	3	4	4	4	4	4	4	4	4
chr01_75058295	chr01	75058295	candidate_SNP:75058294-75058295	1	3	1	2	1	2	2	2	3	2	2	1	0	1	1	3	3	4	0	1	2	2	3	3	1	3	3	3	1	2	3	1	3	2	3	2	3	0	3	2	2	2	1	2	1	3
chr01_75063488	chr01	75063488	solcap_snp_c2_14278	1	3	1	2	1	2	2	2	3	2	2	1	1	1	1	2	2	3	1	2	2	2	2	2	1	3	2	3	1	2	2	1	3	1	2	1	3	0	3	2	2	1	1	2	1	2
chr01_75071992	chr01	75071992	candidate_SNP:75071991-75071992	4	4	4	2	4	4	4	4	4	4	4	4	4	4	4	3	4	4	4	4	3	4	4	3	4	3	4	4	4	4	4	4	3	4	4	4	4	4	4	3	4	3	4	4	3	4
chr01_75075062	chr01	75075062	solcap_snp_c2_14283	2	3	3	3	2	4	4	4	2	2	4	3	1	2	2	3	3	4	2	3	3	3	2	3	2	4	2	3	2	2	2	3	4	2	3	2	4	2	3	3	3	2	2	4	4	3
chr01_75090848	chr01	75090848	PotVar0041226	1	0	1	1	3	3	2	3	2	1	4	1	0	1	2	0	2	2	0	0	1	0	0	0	0	4	0	2	0	0	0	0	3	1	0	1	2	0	0	0	0	0	0	2	1	0
chr01_75090908	chr01	75090908	PotVar0041233	1	0	0	3	3	4	1	4	2	1	4	0	0	1	1	1	2	4	0	1	3	0	0	2	0	4	0	2	0	0	0	0	3	1	0	1	4	0	0	1	1	1	1	2	4	0
chr01_75095513	chr01	75095513	PotVar0041319	4	4	4	3	3	3	4	3	4	4	3	2	4	4	4	4	4	3	4	3	3	4	4	3	4	4	4	4	4	4	4	2	3	4	4	4	3	3	4	3	3	3	4	2	2	4
chr01_75096779	chr01	75096779	candidate_SNP:75096778-75096779	4	4	4	3	3	2	4	2	4	4	3	3	4	4	2	3	4	3	4	3	3	4	4	3	4	3	4	4	4	4	4	3	3	4	4	4	3	2	4	3	3	3	3	2	1	4
chr01_75104968	chr01	75104968	candidate_SNP:75104967-75104968	1	3	2	3	1	3	2	3	3	2	3	2	1	2	1	2	3	3	0	1	2	1	2	2	1	3	2	3	2	2	2	1	3	1	2	2	4	0	3	1	1	1	2	2	2	2
chr01_75118208	chr01	75118208	solcap_snp_c2_14289	3	4	3	2	3	2	2	1	4	4	2	3	4	3	3	3	4	3	2	1	2	3	4	3	3	3	4	2	4	2	3	2	2	3	2	4	3	2	2	0	2	3	3	2	1	2
chr01_75125129	chr01	75125129	solcap_snp_c1_4587	4	4	4	4	4	4	4	4	3	4	4	4	4	4	4	4	4	4	4	3	4	4	4	4	4	4	4	3	4	3	3	4	3	4	3	4	4	4	3	3	4	4	4	4	4	3
chr01_75134710	chr01	75134710	solcap_snp_c1_4595	3	4	2	4	4	4	2	4	4	4	4	4	4	3	4	4	4	4	2	3	4	3	4	4	3	4	4	4	4	4	4	3	4	4	3	4	4	3	4	4	4	4	4	4	4	3
chr01_75138558	chr01	75138558	solcap_snp_c1_4596	3	4	3	4	4	4	2	4	4	4	4	4	4	3	4	4	4	4	2	3	4	3	4	4	3	4	4	4	4	4	4	3	4	4	3	4	4	4	4	4	4	4	4	4	4	3
chr01_75143091	chr01	75143091	candidate_SNP:75143090-75143091	4	4	4	3	4	4	4	4	4	4	4	3	4	4	4	3	4	3	4	4	3	4	4	3	4	3	4	4	4	4	4	4	3	4	4	4	4	4	4	3	3	3	4	3	2	4
chr01_75165561	chr01	75165561	candidate_SNP:75165560-75165561	3	4	3	3	3	2	2	1	3	4	2	3	4	3	3	3	4	3	2	2	3	3	4	3	3	3	4	4	4	3	3	2	2	4	2	4	3	2	3	2	3	3	3	2	1	3
chr01_75168797	chr01	75168797	candidate_SNP:75168796-75168797	4	4	4	4	3	3	4	3	4	4	4	4	4	4	4	4	4	4	4	4	4	4	4	4	4	4	4	4	4	4	4	3	4	4	4	4	4	3	4	4	4	4	4	4	4	4
chr01_75189729	chr01	75189729	PotVar0041409	2	4	3	4	4	4	3	4	4	4	4	4	4	3	4	4	4	4	3	3	4	3	4	4	3	4	4	4	4	4	4	3	4	4	3	4	4	3	4	4	4	4	4	4	4	3
chr01_75190801	chr01	75190801	PotVar0041439	4	4	4	3	4	4	4	4	4	4	4	3	4	4	4	3	4	3	4	4	3	4	4	3	4	3	4	4	4	4	4	4	3	4	4	4	4	4	4	3	3	3	4	3	4	4
chr01_75196506	chr01	75196506	solcap_snp_c1_4604	3	4	3	3	4	3	2	3	3	4	3	2	4	3	3	3	4	2	3	3	3	3	4	2	3	3	4	4	4	3	3	2	2	4	3	4	4	3	3	2	3	2	4	2	1	3
chr01_75213590	chr01	75213590	candidate_SNP:75213589-75213590	4	4	4	4	3	3	4	3	4	4	4	4	4	4	4	4	4	4	4	4	4	4	4	4	4	4	4	4	4	4	4	3	4	4	4	4	4	3	4	4	4	4	4	4	4	4
chr01_75262355	chr01	75262355	candidate_SNP:75262354-75262355	4	4	4	4	4	3	4	3	4	4	4	4	4	4	4	4	4	4	4	4	4	4	4	4	4	4	4	4	4	4	4	3	4	4	4	4	4	3	4	4	4	4	4	4	4	4
chr01_75266586	chr01	75266586	solcap_snp_c1_4607	3	4	3	3	3	2	2	2	3	4	2	2	4	3	3	3	4	3	2	2	3	3	4	3	3	3	4	4	4	3	3	3	2	4	2	4	3	2	3	2	3	3	3	1	1	3
chr01_75267198	chr01	75267198	candidate_SNP:75267197-75267198	4	4	4	4	3	3	4	3	4	4	4	4	4	4	4	4	4	4	4	4	4	4	4	4	4	4	4	4	4	4	4	3	4	4	4	4	4	3	4	4	4	4	4	4	4	4
chr01_75267718	chr01	75267718	ST4.03ch01_74336185	3	4	3	4	4	4	2	4	4	4	4	4	4	3	4	4	4	4	2	3	4	3	4	4	3	4	4	4	4	4	4	3	4	4	3	4	4	3	4	4	4	4	4	4	4	2
chr01_75267730	chr01	75267730	ST4.03ch01_74336197	4	4	4	3	4	4	4	4	4	4	4	3	4	4	4	3	4	3	4	4	2	4	4	3	4	3	4	4	4	4	4	4	3	4	4	4	4	4	4	3	3	3	4	3	3	4
chr01_75271187	chr01	75271187	candidate_SNP:75271186-75271187	3	4	2	4	4	4	2	4	4	4	4	4	4	3	4	4	4	4	3	3	4	3	4	4	3	4	4	4	4	4	4	3	4	4	3	4	4	3	4	4	4	4	4	4	4	2
chr01_75283534	chr01	75283534	ST4.03ch01_74352214	4	1	3	3	3	2	3	2	2	3	1	3	4	4	2	2	3	3	4	4	3	4	3	4	3	0	2	3	4	4	4	4	4	4	4	3	3	3	4	4	4	4	4	4	3	4
chr01_75286654	chr01	75286654	solcap_snp_c1_4617	4	1	3	2	2	0	3	0	1	2	1	1	4	4	2	2	3	1	4	2	2	4	3	3	3	0	2	2	4	3	3	2	2	4	3	3	2	3	2	2	3	3	3	2	0	3
chr01_75288579	chr01	75288579	ST4.03ch01_74357259	3	0	1	1	1	0	1	0	1	2	1	1	4	3	2	2	3	0	2	1	3	2	3	3	2	0	1	1	4	4	3	2	2	4	1	4	2	2	2	2	2	2	3	2	0	1
chr01_75320033	chr01	75320033	PotVar0041571	4	4	4	3	4	4	4	4	4	4	4	3	4	4	4	2	4	3	4	4	3	4	4	3	4	3	4	4	4	4	4	4	3	4	4	4	4	4	4	3	3	3	4	3	3	4
chr01_75320264	chr01	75320264	PotVar0041585	4	2	3	3	3	2	3	3	3	2	3	3	4	4	3	3	3	2	4	4	3	4	3	4	3	2	3	3	4	4	4	3	4	4	4	3	3	4	4	4	4	4	4	4	3	4
chr01_75321113	chr01	75321113	PotVar0041618	3	1	2	2	2	0	1	0	2	2	1	1	4	3	1	2	3	2	1	1	2	3	3	3	2	0	2	2	4	3	3	1	2	4	2	3	3	2	2	2	2	3	3	2	0	2
chr01_75321524	chr01	75321524	solcap_snp_c1_4624	3	4	3	4	4	4	2	4	4	4	4	4	4	3	4	4	4	4	2	3	4	3	4	4	3	4	4	4	4	4	4	3	4	4	3	4	4	3	4	4	4	4	4	4	4	3
chr01_75330643	chr01	75330643	ST4.03ch01_74400378	4	4	4	4	3	2	4	2	4	4	3	3	4	4	3	4	4	4	4	3	4	4	4	4	4	4	4	4	4	4	4	3	4	4	4	4	3	3	4	4	4	4	3	2	2	4
chr01_75342656	chr01	75342656	solcap_snp_c1_4625	3	1	3	2	3	0	0	0	3	3	3	1	4	2	2	2	4	2	3	1	2	2	3	2	4	0	1	1	3	4	2	0	1	3	3	4	2	3	2	2	4	3	4	2	0	2
chr01_75356884	chr01	75356884	ST4.03ch01_74426833	4	4	4	4	4	3	4	3	4	4	3	4	4	4	3	4	4	4	4	3	4	4	4	3	4	4	3	3	3	4	4	4	4	3	4	3	3	4	4	4	4	4	4	3	3	4
chr01_75363039	chr01	75363039	ST4.03ch01_74433110	4	1	4	2	3	0	3	0	1	2	3	1	4	4	2	2	3	1	4	2	3	3	3	2	3	0	1	1	4	3	3	3	2	3	2	3	2	4	2	2	3	2	3	1	0	3
chr01_75373572	chr01	75373572	solcap_snp_c2_14330	4	1	4	3	3	2	3	1	1	2	3	3	4	4	3	3	3	2	4	3	3	3	3	4	3	1	2	2	4	3	3	2	3	4	3	3	3	4	2	3	4	2	3	3	3	3
chr01_75385578	chr01	75385578	candidate_SNP:75385577-75385578	4	4	4	2	3	2	4	1	4	4	3	1	4	4	3	2	4	3	4	3	3	4	4	2	4	2	3	2	4	4	4	3	2	3	4	4	2	3	4	3	3	3	4	2	1	4
chr01_75386015	chr01	75386015	solcap_snp_c1_4643	3	2	3	4	4	0	1	0	0	1	1	2	4	2	3	3	3	0	1	2	4	2	3	2	2	0	1	0	3	3	4	2	4	4	3	2	3	3	2	3	4	1	3	1	0	1
chr01_75387178	chr01	75387178	candidate_SNP:75387177-75387178	3	1	3	2	2	0	1	0	1	2	2	1	4	3	2	2	3	1	2	1	2	2	3	3	2	0	1	1	3	3	3	1	2	3	2	3	2	2	2	2	3	2	3	1	0	2
chr01_75448729	chr01	75448729	candidate_SNP:75448728-75448729	4	4	4	4	4	4	4	4	4	4	4	4	4	4	4	4	4	4	4	3	4	4	4	2	4	4	3	3	3	4	4	4	4	3	4	3	4	4	4	4	4	4	4	4	4	4
chr01_75461950	chr01	75461950	ST4.03ch01_74532779	4	4	4	4	4	4	4	4	4	4	4	4	4	4	4	4	4	4	4	3	4	4	4	3	4	4	3	3	2	4	4	4	4	3	4	3	3	4	4	4	4	4	4	4	4	4
chr01_75462018	chr01	75462018	ST4.03ch01_74532847	4	4	4	3	4	4	4	4	4	4	4	3	3	4	4	3	4	3	4	4	3	4	4	3	4	3	4	4	4	4	4	4	3	4	4	4	4	4	4	3	3	3	4	3	3	4
chr01_75468800	chr01	75468800	candidate_SNP:75468799-75468800	4	4	4	4	4	2	4	2	4	4	3	3	4	4	3	4	4	4	4	4	4	4	4	4	4	4	4	4	4	4	4	3	4	4	4	4	4	3	4	4	4	4	4	3	2	4
chr01_75496416	chr01	75496416	ST4.03ch01_74567539	3	4	3	4	4	4	2	4	3	4	4	4	4	3	4	4	3	4	2	4	4	2	4	3	3	4	4	4	3	3	3	3	3	4	2	4	4	3	2	3	4	4	4	4	4	3
chr01_75514382	chr01	75514382	candidate_SNP:75514381-75514382	4	4	4	4	4	4	4	4	4	4	4	4	4	4	4	4	4	4	4	3	4	4	4	3	4	4	3	3	3	4	4	4	4	3	4	3	3	4	4	4	4	4	4	4	4	4
chr01_75538002	chr01	75538002	ST4.03ch01_74608763	3	4	3	4	4	4	2	4	4	4	4	4	4	3	4	4	3	4	2	4	4	3	4	3	3	4	4	4	3	4	4	3	4	4	3	4	4	3	4	4	4	4	3	4	4	2
chr01_75551262	chr01	75551262	ST4.03ch01_74622553	4	4	4	4	4	2	4	3	4	4	3	4	4	4	2	4	4	4	4	3	4	4	4	3	4	4	3	3	2	4	4	4	4	3	4	3	3	4	4	4	4	4	4	2	2	4
chr01_75565846	chr01	75565846	ST4.03ch01_74637136	3	4	3	4	4	4	2	4	4	4	4	4	4	3	4	4	3	4	2	4	4	3	4	3	3	4	4	4	3	4	4	3	4	4	3	4	4	3	4	4	4	4	4	4	4	3
chr01_75583987	chr01	75583987	candidate_SNP:75583986-75583987	4	4	4	4	4	4	4	4	4	4	4	4	4	4	4	4	4	4	4	3	4	4	4	4	4	4	3	3	3	4	4	4	4	3	4	3	3	4	4	4	4	4	4	4	4	4
chr01_75591185	chr01	75591185	candidate_SNP:75591184-75591185	4	4	4	3	3	2	4	1	4	4	3	2	3	4	3	3	3	4	4	3	3	3	4	2	4	2	2	3	3	4	4	3	3	2	4	2	4	3	4	3	2	3	4	2	1	4
chr01_75594397	chr01	75594397	candidate_SNP:75594396-75594397	1	2	3	3	2	4	4	4	3	3	2	3	2	3	2	3	3	3	2	1	1	4	1	4	3	4	3	3	3	2	2	3	3	2	3	3	4	2	3	3	2	2	1	3	4	2
chr01_75597912	chr01	75597912	ST4.03ch01_74671313	3	3	3	3	2	1	4	1	2	4	3	2	4	3	2	3	4	4	4	3	3	4	3	4	2	4	4	4	3	3	3	3	4	3	3	4	4	2	4	4	3	3	3	3	2	4
chr01_75614589	chr01	75614589	ST4.03ch01_74687914	4	4	4	3	4	4	4	4	4	4	4	3	3	4	4	3	4	3	4	4	3	4	4	3	4	3	4	4	4	4	4	4	3	4	4	4	4	4	4	3	3	3	4	3	3	4
chr01_75614893	chr01	75614893	solcap_snp_c2_14366	3	4	3	4	4	4	2	4	4	4	4	4	4	3	4	4	3	4	2	4	4	3	4	2	3	4	4	4	3	4	4	3	4	4	3	4	4	3	4	4	4	4	4	4	4	2
chr01_75621552	chr01	75621552	PotVar0041660	0	2	3	2	1	2	2	2	2	3	2	1	1	1	2	2	2	2	0	1	2	2	1	1	2	2	3	1	1	3	1	1	2	1	2	2	3	0	1	2	2	1	2	1	2	2
chr01_75641113	chr01	75641113	ST4.03ch01_74714462	3	4	3	4	4	4	2	4	4	4	4	4	4	3	4	4	3	4	2	4	4	3	4	3	3	4	4	4	3	4	4	3	4	4	3	4	4	3	4	4	4	4	4	4	4	3
chr01_75668861	chr01	75668861	solcap_snp_c1_4666	1	3	3	3	3	4	4	4	3	4	4	3	4	3	2	3	4	4	4	3	3	4	3	4	2	4	4	4	4	2	4	4	4	3	2	4	4	4	4	3	3	3	4	4	4	2
chr01_75679662	chr01	75679662	ST4.03ch01_74752800	0	2	2	3	1	2	2	2	2	2	1	1	3	1	1	2	2	3	0	1	1	2	2	1	1	4	2	2	1	1	1	1	1	1	1	2	3	0	1	0	1	1	2	1	1	2
chr01_75682535	chr01	75682535	candidate_SNP:75682534-75682535	4	4	4	4	4	4	4	4	4	4	4	4	4	4	4	4	4	4	4	3	4	4	4	2	4	4	3	3	3	4	4	4	4	3	4	3	3	3	4	4	4	4	4	4	4	4
chr01_75688796	chr01	75688796	ST4.03ch01_74761893	2	3	4	3	2	4	4	4	2	0	2	4	2	2	3	4	1	3	1	3	3	3	1	4	4	4	4	2	4	2	2	3	1	2	3	3	4	3	1	1	3	4	3	4	4	3
chr01_75689596	chr01	75689596	candidate_SNP:75689595-75689596	4	4	4	4	4	3	4	3	4	4	3	4	4	4	3	4	4	3	4	4	3	4	4	4	4	4	4	4	4	4	4	4	3	4	4	4	4	4	4	4	4	4	4	3	2	4
chr01_75696378	chr01	75696378	ST4.03ch01_74769475	4	4	4	3	4	4	4	4	4	4	4	3	3	4	4	3	4	3	4	4	3	4	4	3	4	3	4	4	4	4	4	4	3	4	4	4	4	4	4	3	3	3	4	3	3	4
chr01_75714724	chr01	75714724	solcap_snp_c1_4667	2	4	2	4	4	4	2	4	4	4	4	4	4	3	4	4	3	4	2	4	3	3	4	4	1	4	4	4	4	4	4	3	4	4	2	4	4	3	4	4	4	4	3	4	3	2
chr01_75737580	chr01	75737580	candidate_SNP:75737579-75737580	4	4	4	4	3	2	4	3	4	4	4	4	4	4	4	4	4	4	4	4	4	4	4	4	4	4	4	4	4	4	4	3	4	4	4	4	4	3	4	4	4	4	4	4	4	4
chr01_75783972	chr01	75783972	candidate_SNP:75783971-75783972	4	1	4	3	3	2	4	2	1	2	4	4	3	4	3	3	4	3	4	4	4	4	3	3	1	1	2	3	3	3	2	3	4	4	4	3	3	4	3	4	4	3	1	3	3	4
chr01_75815779	chr01	75815779	solcap_snp_c2_14397	3	3	3	2	3	3	3	3	3	4	4	2	2	3	3	2	4	3	4	2	2	4	3	1	3	3	3	2	1	3	3	3	3	2	3	3	3	3	3	3	2	1	3	2	3	2
chr01_75828797	chr01	75828797	candidate_SNP:75828796-75828797	4	4	4	2	3	2	3	2	4	4	3	2	3	4	3	3	4	3	4	3	3	4	4	2	4	3	3	3	2	4	4	3	3	3	4	3	2	3	4	3	3	3	4	2	1	4
chr01_75860792	chr01	75860792	candidate_SNP:75860791-75860792	0	0	0	0	0	0	0	0	0	0	0	0	1	0	0	0	0	0	0	0	0	0	0	1	0	0	0	0	0	1	1	0	0	0	0	0	0	0	1	0	0	1	0	1	0	0
chr01_75905119	chr01	75905119	solcap_snp_c2_14402	3	3	3	3	4	4	4	4	3	4	4	3	4	3	3	3	4	4	4	2	3	4	2	4	2	4	4	3	3	3	3	4	4	3	3	4	4	4	4	3	3	3	3	4	4	2
chr01_75906386	chr01	75906386	candidate_SNP:75906385-75906386	4	4	4	4	4	4	4	3	4	4	3	4	4	4	3	4	4	4	4	4	4	4	4	4	4	4	4	4	4	4	4	4	4	4	4	4	4	4	4	4	4	4	4	3	4	4
chr01_75927919	chr01	75927919	PotVar0041748	4	4	4	3	4	4	4	4	4	4	4	3	3	4	4	3	4	3	4	4	3	4	4	3	4	3	4	4	4	4	4	4	3	4	4	4	4	4	4	3	3	3	3	3	3	4
chr01_75928377	chr01	75928377	PotVar0041770	4	4	4	4	4	4	4	4	4	4	4	4	4	4	4	4	4	4	4	4	4	4	4	4	4	4	4	4	4	4	4	4	4	4	4	4	4	4	4	4	4	4	4	4	4	4
chr01_75929180	chr01	75929180	PotVar0041824	4	3	4	3	3	3	3	3	4	3	4	3	3	4	4	3	4	4	4	3	4	4	4	3	4	4	3	2	3	4	4	2	4	3	4	3	2	3	4	4	3	4	4	3	1	4
chr01_75931608	chr01	75931608	solcap_snp_c1_14931	4	3	4	3	3	0	2	0	3	3	3	2	3	3	3	2	3	4	4	2	3	4	3	1	2	0	2	0	1	4	4	3	3	2	4	2	2	3	4	4	3	4	3	3	0	3
chr01_75949615	chr01	75949615	solcap_snp_c1_5253	4	2	4	1	3	0	3	0	2	2	2	2	3	4	3	2	3	3	4	3	3	4	3	1	2	0	1	1	2	4	4	2	3	3	4	1	3	3	3	3	3	3	2	2	0	4
chr01_75955149	chr01	75955149	candidate_SNP:75955148-75955149	4	2	4	3	3	2	4	2	2	2	4	4	4	4	3	3	3	3	4	4	4	4	3	4	3	1	3	3	4	4	4	3	4	4	4	3	3	4	4	4	4	4	4	4	3	4
chr01_75966381	chr01	75966381	candidate_SNP:75966380-75966381	4	4	4	4	4	4	4	3	4	4	3	4	4	4	3	4	4	4	4	4	4	4	4	4	4	4	4	4	4	4	4	4	4	4	4	4	4	4	4	4	4	4	4	3	2	4
chr01_75968172	chr01	75968172	solcap_snp_c1_5254	2	0	3	3	2	0	4	1	2	2	4	2	2	3	1	3	3	2	4	2	2	4	3	2	0	0	2	0	3	3	3	3	4	1	3	2	2	4	4	1	2	3	2	3	1	1
chr01_75981068	chr01	75981068	ST4.03ch01_75058855	4	4	4	2	4	2	3	2	4	4	3	2	3	4	3	2	4	3	4	3	3	4	4	2	4	3	3	2	3	4	4	3	3	3	4	3	3	3	3	2	3	3	3	2	3	4
chr01_75981092	chr01	75981092	ST4.03ch01_75058879	4	4	4	4	4	2	3	2	4	4	3	3	4	4	3	4	4	4	4	3	4	4	4	3	4	4	3	2	3	4	4	3	4	3	4	4	3	3	4	4	4	4	4	3	3	4
chr01_75983526	chr01	75983526	ST4.03ch01_75061285	4	4	4	4	2	2	4	3	4	4	3	3	4	4	3	4	4	4	4	3	4	4	4	3	4	4	3	2	4	4	4	3	4	3	4	3	3	2	4	4	4	4	4	2	3	4
chr01_75986217	chr01	75986217	ST4.03ch01_75063977	4	4	4	4	3	1	3	2	4	4	4	3	4	4	2	4	4	4	4	3	4	4	4	3	4	4	2	2	3	4	4	3	4	3	4	3	2	3	4	4	3	4	4	3	3	4
chr01_76011177	chr01	76011177	candidate_SNP:76011176-76011177	4	4	4	4	4	4	4	4	4	4	4	4	4	4	4	4	4	4	4	3	4	4	4	3	4	4	4	2	4	4	4	4	4	4	4	3	4	4	4	4	4	4	4	4	4	4
chr01_76042391	chr01	76042391	candidate_SNP:76042390-76042391	4	4	4	4	4	4	4	4	3	4	4	4	3	4	4	4	4	4	4	3	4	3	4	4	4	4	4	3	3	3	3	4	3	4	3	4	4	4	3	3	4	3	3	3	4	3
chr01_76080824	chr01	76080824	solcap_snp_c2_16369	4	1	4	2	3	3	4	1	3	2	4	2	3	4	4	2	2	2	4	3	3	4	3	3	2	0	3	3	4	4	4	4	4	4	4	2	3	4	4	2	3	2	3	3	3	2
chr01_76095084	chr01	76095084	PotVar0041852	4	4	4	3	4	4	4	4	4	4	4	3	3	4	4	3	4	3	4	2	3	4	4	3	4	4	4	3	4	4	4	4	3	4	4	4	4	4	4	3	3	3	4	3	3	3
chr01_76097593	chr01	76097593	candidate_SNP:76097592-76097593	4	4	4	4	4	4	3	4	4	4	4	4	4	4	4	4	4	4	4	4	4	4	4	4	4	4	3	3	3	4	4	4	4	3	4	3	3	4	4	4	4	4	4	4	4	4
chr01_76103179	chr01	76103179	candidate_SNP:76103178-76103179	4	2	4	2	3	1	4	1	2	2	3	4	4	4	2	3	3	3	4	3	4	4	3	4	3	1	3	2	4	4	4	3	4	4	4	3	3	4	4	4	4	4	4	3	3	3
chr01_76105867	chr01	76105867	PotVar0041901	4	2	4	3	3	2	4	2	2	2	4	4	4	4	3	3	3	3	4	3	4	4	3	4	3	1	3	2	4	4	4	3	4	4	4	3	3	4	4	4	4	4	4	4	3	3
chr01_76106201	chr01	76106201	PotVar0041919	4	4	2	3	4	1	2	2	4	4	1	3	3	3	2	3	2	4	4	2	3	2	4	3	4	4	3	4	3	4	4	4	4	2	2	3	0	4	4	4	3	4	4	2	1	3
chr01_76108154	chr01	76108154	PotVar0042010	4	4	4	4	3	2	3	2	4	4	3	3	4	4	3	4	4	4	4	3	4	4	4	3	4	4	3	2	2	4	4	3	4	3	4	3	3	3	4	4	4	4	4	3	3	4
chr01_76113895	chr01	76113895	PotVar0042153	4	4	4	3	4	4	4	4	4	4	4	3	4	4	4	3	4	3	4	4	4	4	4	3	4	3	4	4	4	4	4	4	3	4	4	4	4	4	4	3	3	3	4	3	4	4
chr01_76127196	chr01	76127196	candidate_SNP:76127195-76127196	4	4	4	4	4	4	4	4	4	4	4	4	4	4	4	4	4	4	4	3	4	4	4	4	4	4	4	3	4	4	4	4	4	4	4	4	4	4	4	4	4	4	4	4	4	3
chr01_76179993	chr01	76179993	candidate_SNP:76179992-76179993	4	4	4	4	4	4	3	4	4	4	4	4	4	4	4	4	4	4	4	3	4	4	4	4	4	4	3	3	1	4	4	4	4	3	4	3	3	4	4	4	4	4	4	4	4	4
chr01_76185515	chr01	76185515	solcap_snp_c2_16383	3	3	4	4	2	4	4	4	4	3	3	4	3	3	3	4	3	3	2	4	4	4	3	4	4	4	3	4	4	3	3	3	4	4	4	3	4	3	3	4	4	3	3	4	4	4
chr01_76210536	chr01	76210536	candidate_SNP:76210535-76210536	4	4	4	4	4	4	4	4	4	4	4	4	2	4	4	4	4	4	4	4	4	4	4	4	4	4	4	4	4	3	3	4	4	4	4	4	4	4	4	4	4	3	2	3	4	4
chr01_76241587	chr01	76241587	candidate_SNP:76241586-76241587	4	2	4	1	2	2	4	3	2	2	3	4	4	3	4	2	3	3	4	3	4	3	3	4	3	2	1	2	4	4	4	4	4	4	4	2	2	4	4	4	4	4	4	4	3	3
chr01_76244061	chr01	76244061	solcap_snp_c1_5267	3	2	4	4	3	2	4	3	4	2	2	4	3	3	3	4	3	3	2	4	4	4	3	4	4	4	3	4	4	3	3	3	4	4	4	3	4	2	3	4	4	3	3	3	3	4
chr01_76258395	chr01	76258395	candidate_SNP:76258394-76258395	4	1	4	2	2	1	3	1	2	0	1	2	3	2	2	2	3	2	2	1	3	2	2	3	3	0	1	1	4	3	3	2	2	3	4	2	2	3	3	3	3	2	3	2	2	3
chr01_76294990	chr01	76294990	solcap_snp_c1_5270	3	3	4	2	1	3	3	3	4	2	2	2	1	3	3	3	3	3	1	3	3	4	3	1	4	3	2	2	4	3	2	1	3	3	4	2	3	1	3	2	2	1	3	2	1	4
chr01_76298192	chr01	76298192	solcap_snp_c2_16409	3	1	2	1	0	0	3	0	1	0	0	1	0	2	1	1	1	0	3	1	2	1	2	0	3	0	0	0	2	1	1	1	1	2	2	0	0	2	1	1	1	1	2	1	1	1
chr01_76299176	chr01	76299176	candidate_SNP:76299175-76299176	3	2	1	2	0	0	3	0	2	0	0	2	0	3	3	1	1	0	3	2	2	2	2	0	2	0	0	0	2	1	2	1	1	1	1	0	0	2	0	3	2	1	3	1	2	2
chr01_76329546	chr01	76329546	candidate_SNP:76329545-76329546	4	4	4	4	2	2	3	2	4	4	2	4	4	4	3	4	4	4	3	3	4	4	3	3	4	4	3	2	3	4	3	3	4	3	4	3	3	2	4	4	4	4	4	3	3	4
chr01_76341004	chr01	76341004	ST4.03ch01_75443838	3	3	4	4	2	3	3	4	4	2	1	4	3	3	2	4	3	2	3	3	4	4	4	2	4	4	2	2	4	3	3	3	4	2	4	2	3	2	3	4	4	2	3	3	3	4
chr01_76351267	chr01	76351267	ST4.03ch01_75454100	4	4	4	4	4	4	3	4	4	4	4	4	4	4	4	4	4	4	4	3	4	4	4	3	4	4	3	3	3	4	4	4	4	3	4	3	3	4	4	4	4	4	4	4	4	4
chr01_76372197	chr01	76372197	solcap_snp_c1_5286	3	1	3	1	0	0	3	0	1	0	0	1	0	3	1	1	1	0	3	2	3	1	2	1	1	0	0	1	0	2	1	0	2	1	3	0	0	1	2	3	2	2	2	2	1	3
chr01_76374420	chr01	76374420	PotVar0042350	3	3	4	3	2	2	3	3	4	2	3	3	3	3	3	4	4	3	2	4	4	4	4	3	4	4	2	2	3	3	4	3	4	4	4	3	2	3	3	4	4	3	3	4	4	4
chr01_76375345	chr01	76375345	PotVar0042403	4	4	4	4	4	3	3	3	4	4	3	4	4	4	3	4	4	4	4	3	4	4	4	3	4	4	3	3	3	4	4	4	4	3	4	3	3	4	4	4	4	4	4	3	3	4
chr01_76378448	chr01	76378448	PotVar0042444	3	1	2	1	1	0	2	0	1	0	0	1	1	1	1	1	1	0	1	1	2	1	2	0	3	0	0	1	2	1	2	1	0	1	3	0	0	1	1	2	2	1	2	1	1	3
chr01_76379200	chr01	76379200	candidate_SNP:76379199-76379200	4	2	4	3	2	2	4	2	2	2	3	4	4	2	2	3	3	3	4	2	4	2	3	4	3	2	3	3	4	4	4	3	4	4	4	3	2	4	4	4	4	4	4	4	2	2
chr01_76403549	chr01	76403549	solcap_snp_c2_16431	4	2	4	2	3	1	4	3	2	2	2	4	3	3	3	2	3	3	4	3	3	2	3	3	3	1	3	3	3	2	2	3	3	4	3	3	2	4	3	2	3	3	3	3	3	3
chr01_76415277	chr01	76415277	solcap_snp_c2_16435	3	1	2	1	0	0	3	0	1	0	0	1	0	2	1	1	1	0	3	1	1	0	2	0	3	0	0	2	1	1	1	1	1	0	2	0	0	1	2	1	1	1	3	1	1	4
chr01_76418380	chr01	76418380	candidate_SNP:76418379-76418380	4	4	4	4	3	2	4	3	4	4	4	4	4	4	4	4	4	4	4	4	4	4	4	4	4	4	4	4	4	4	4	3	4	4	4	4	4	2	4	4	4	4	4	4	4	4
chr01_76423191	chr01	76423191	candidate_SNP:76423190-76423191	4	4	2	2	4	4	2	4	4	4	3	2	2	4	4	3	3	2	4	4	2	3	4	2	4	3	3	4	3	4	4	4	2	2	3	3	3	4	4	3	2	3	4	2	3	4
chr01_76427185	chr01	76427185	candidate_SNP:76427184-76427185	3	2	4	4	2	2	3	3	4	1	2	3	3	3	2	4	3	3	3	2	4	4	2	3	4	4	2	2	3	3	3	3	4	3	4	2	3	2	3	4	4	3	3	3	3	4
chr01_76432003	chr01	76432003	solcap_snp_c2_16441	3	3	2	2	1	2	2	2	4	2	1	1	1	3	1	2	2	1	2	2	1	3	3	0	4	3	1	2	2	3	3	2	2	1	2	2	2	2	3	1	1	2	3	2	2	4
chr01_76440986	chr01	76440986	solcap_snp_c1_5299	3	3	4	4	2	3	4	3	4	2	2	4	3	3	2	4	3	3	2	4	4	4	3	4	4	4	3	4	4	3	3	3	4	4	4	4	4	2	3	4	4	3	3	3	3	4
chr01_76441396	chr01	76441396	solcap_snp_c2_16444	3	3	4	4	2	4	4	4	4	2	3	4	3	3	3	4	3	3	2	4	4	4	3	4	4	4	3	4	4	3	3	3	4	4	4	4	4	2	3	4	4	3	3	4	4	4
chr01_76450391	chr01	76450391	candidate_SNP:76450390-76450391	4	4	2	2	4	4	3	4	4	4	3	2	2	4	4	2	3	2	4	4	2	3	4	2	4	3	3	4	2	4	4	4	2	2	3	3	3	4	4	3	2	3	4	3	3	4
chr01_76464856	chr01	76464856	candidate_SNP:76464855-76464856	3	3	2	2	2	3	2	3	4	2	1	2	1	3	2	2	2	1	2	3	1	3	3	1	4	3	1	2	2	3	3	3	2	1	3	2	2	2	3	2	1	2	3	2	2	4
chr01_76472794	chr01	76472794	candidate_SNP:76472793-76472794	4	4	2	2	4	4	3	4	4	4	3	2	2	4	4	3	3	2	4	4	2	3	4	2	4	3	3	4	3	4	4	4	3	2	3	3	3	4	4	3	2	3	4	3	2	4
chr01_76514400	chr01	76514400	candidate_SNP:76514399-76514400	4	4	4	3	4	4	4	4	4	4	4	4	4	4	4	3	4	4	4	4	4	4	4	3	4	3	4	4	4	4	4	4	4	4	4	4	4	4	4	4	2	4	4	4	4	4
chr01_76538388	chr01	76538388	candidate_SNP:76538387-76538388	3	3	4	4	3	4	4	4	4	2	2	4	2	2	3	4	3	3	2	4	4	4	3	4	4	4	2	4	4	3	3	2	4	4	4	4	4	2	3	4	4	3	3	4	4	4
chr01_76548782	chr01	76548782	candidate_SNP:76548781-76548782	3	3	4	4	2	2	3	2	4	2	3	3	2	3	2	4	3	3	2	3	3	4	2	4	4	4	2	2	3	2	2	1	4	3	4	3	3	1	4	2	3	3	3	3	3	4
chr01_76610376	chr01	76610376	candidate_SNP:76610375-76610376	4	4	4	4	4	3	4	3	4	4	3	4	4	4	3	4	4	4	4	4	4	4	4	4	4	4	4	4	4	4	4	4	4	4	4	4	4	4	4	4	4	4	4	3	3	4
chr01_76613591	chr01	76613591	candidate_SNP:76613590-76613591	4	4	4	4	4	3	4	3	4	4	4	4	4	4	3	4	4	4	4	4	4	4	4	4	4	4	4	4	4	4	4	4	4	4	4	4	4	4	4	4	4	4	4	3	4	4
chr01_76623175	chr01	76623175	candidate_SNP:76623174-76623175	4	4	4	4	4	4	3	4	4	4	4	4	4	4	4	4	4	4	4	3	4	4	4	3	4	4	3	3	3	4	4	4	4	3	4	3	3	4	4	4	4	4	4	4	4	4
chr01_76630429	chr01	76630429	solcap_snp_c2_16466	3	3	4	4	1	3	2	4	4	1	3	3	3	3	2	4	2	3	3	3	4	4	2	3	4	4	2	1	4	2	3	2	4	3	4	4	3	1	3	4	4	2	3	4	4	4
chr01_76633548	chr01	76633548	candidate_SNP:76633547-76633548	4	4	4	4	4	4	3	4	4	4	4	3	4	4	4	4	4	4	4	3	4	4	4	3	4	4	3	3	3	4	4	4	4	3	4	3	3	4	4	4	4	4	4	4	4	4
chr01_76647451	chr01	76647451	solcap_snp_c2_16470	3	3	4	4	2	3	3	3	4	2	3	4	3	4	2	4	3	3	2	3	4	4	2	3	4	4	2	3	2	3	3	3	4	3	4	3	3	2	3	4	4	3	2	3	3	4
chr01_76659398	chr01	76659398	solcap_snp_c2_16478	3	3	4	4	1	2	4	2	4	1	3	2	4	3	2	4	3	4	2	4	4	4	4	4	4	4	3	4	4	3	4	2	4	4	4	4	4	2	2	4	4	3	3	3	4	4
chr01_76661059	chr01	76661059	solcap_snp_c2_16479	4	4	2	3	4	4	3	4	4	4	3	3	2	4	4	3	3	3	4	4	3	3	4	3	4	4	3	4	3	4	4	4	3	2	3	3	3	4	4	3	3	3	4	3	4	4
chr01_76662329	chr01	76662329	ST4.03ch01_75781425	3	3	4	4	2	2	3	2	4	3	2	3	3	3	3	4	3	2	2	3	4	4	3	3	4	4	2	2	3	3	3	2	4	3	4	2	3	1	3	4	4	3	3	3	3	4
chr01_76670716	chr01	76670716	solcap_snp_c1_5346	1	3	2	3	4	4	3	4	2	4	4	3	4	4	3	4	3	4	3	3	3	1	3	3	2	4	4	4	2	2	1	3	3	3	1	4	4	2	3	1	3	2	3	4	3	2
chr01_76689107	chr01	76689107	ST4.03ch01_75808380	2	3	4	4	2	2	3	3	4	3	2	3	3	3	2	4	3	1	2	3	4	4	4	3	4	4	1	1	2	2	2	4	4	4	4	3	4	0	4	4	4	2	3	4	4	4
chr01_76694360	chr01	76694360	candidate_SNP:76694359-76694360	3	3	4	4	1	2	3	2	4	3	2	3	3	3	2	4	3	3	2	3	4	4	3	3	4	4	2	2	3	3	3	2	4	3	4	3	3	1	3	4	4	3	2	3	3	4
chr01_76703969	chr01	76703969	candidate_SNP:76703968-76703969	4	4	3	3	4	4	3	4	4	4	2	3	2	4	4	3	3	3	4	4	3	3	4	3	4	4	3	4	3	4	4	4	3	2	3	3	3	4	4	3	3	3	4	2	4	4
chr01_76717391	chr01	76717391	ST4.03ch01_75836661	3	4	2	3	4	4	3	4	4	4	3	3	1	4	4	3	3	3	4	4	3	3	4	3	4	4	3	4	3	3	3	4	2	2	3	3	3	4	3	3	3	3	4	2	4	4
chr01_76717411	chr01	76717411	ST4.03ch01_75836681	2	3	2	3	1	2	2	2	4	2	2	2	1	3	2	3	3	2	2	3	3	3	3	2	4	4	1	2	1	2	2	2	2	1	3	2	2	1	2	3	3	2	3	1	3	4
chr01_76721801	chr01	76721801	PotVar0042497	3	3	3	4	3	4	4	4	4	3	4	3	3	4	3	4	4	4		3	2	3	3	4	4	4	4	4	4	4	2	4	4	4	2	4	4	4	3	2	2	3	4	4	1	2
chr01_76722869	chr01	76722869	PotVar0042582	4	4	4	4	4	4	3	4	4	4	4	4	4	4	4	4	4	4	4	3	4	4	4	3	4	4	2	3	3	4	4	4	4	3	4	3	3	4	4	4	4	4	4	4	4	4
chr01_76723600	chr01	76723600	PotVar0042631	4	4	4	4	4	4	4	4	4	4	4	4	4	4	4	4	4	4	4	4	4	4	4	4	4	4	4	4	4	4	4	4	4	4	4	4	4	4	4	3	2	4	4	4	4	4
chr01_76725613	chr01	76725613	PotVar0042709	0	2	0	2	1	2	0	2	2	2	1	1	1	2	1	2	1	2	0	2	1	1	1	1	1	4	1	2	0	0	0	2	1	0	0	2	2	0	1	0	1	1	1	1	1	2
chr01_76725679	chr01	76725679	PotVar0042710	3	3	4	4	1	2	3	1	4	2	2	3	3	3	2	4	3	3	2	3	4	4	3	3	4	4	2	2	2	4	3	2	4	3	4	3	2	1	3	4	4	3	3	3	3	4
chr01_76727564	chr01	76727564	PotVar0042723	4	4	1	3	4	4	2	4	4	4	2	2	2	4	4	3	3	4	4	4	3	3	4	3	4	4	3	4	3	4	4	4	3	2	3	3	3	4	4	3	3	3	4	3	4	4
chr01_76728512	chr01	76728512	PotVar0042755	1	3	2	3	4	4	2	4	2	4	4	3	4	3	2	3	3	4	2	3	3	2	1	3	1	4	4	4	2	1	2	3	3	3	1	4	4	3	3	2	3	3	3	4	3	2
chr01_76735051	chr01	76735051	solcap_snp_c1_5355	3	3	4	4	1	3	3	2	4	2	2	3	3	3	2	4	3	3	2	3	4	4	3	3	4	4	2	2	2	3	3	2	4	3	4	3	3	2	3	4	4	3	3	3	3	4
chr01_76759965	chr01	76759965	candidate_SNP:76759964-76759965	0	1	0	2	0	0	0	0	0	0	0	1	1	0	0	2	0	1	0	0	1	0	0	1	0	3	1	0	0	0	0	0	1	0	0	1	1	0	0	0	1	1	1	1	1	0
chr01_76770683	chr01	76770683	ST4.03ch01_75890723	3	2	4	4	2	2	3	2	4	2	2	3	3	3	1	4	3	3	3	3	4	4	3	3	4	4	2	2	2	3	3	2	4	2	4	3	2	1	3	4	4	3	3	2	3	4
chr01_76773664	chr01	76773664	ST4.03ch01_75893704	3	3	4	4	1	2	3	2	4	2	2	3	3	3	2	4	3	3	2	3	4	4	3	3	4	4	2	2	3	3	3	2	4	3	4	3	3	1	3	4	4	3	3	3	3	4
chr01_76778305	chr01	76778305	ST4.03ch01_75898345	3	3	0	2	2	2	1	2	0	2	1	2	2	1	2	2	1	2	2	1	2	0	1	2	0	4	3	2	1	2	2	2	2	1	0	2	1	3	2	1	2	1	2	3	3	0
chr01_76808812	chr01	76808812	solcap_snp_c2_16530	3	3	4	4	3	4	4	4	4	2	3	4	3	3	3	4	2	2	2	4	4	4	3	4	4	4	3	4	4	3	3	3	4	4	4	4	4	2	3	4	4	3	3	4	4	4
chr01_76812247	chr01	76812247	candidate_SNP:76812246-76812247	3	3	4	4	1	2	4	3	2	3	2	3	3	3	2	4	3	3	3	3	2	3	4	4	4	4	2	4	3	2	2	2	3	4	3	4	4	2	2	1	2	3	3	3	2	4
chr01_76870701	chr01	76870701	ST4.03ch01_76028694	2	3	4	4	1	2	4	2	4	2	2	4	3	2	2	4	3	3	1	4	4	4	3	4	4	4	3	4	4	3	3	2	4	4	4	4	4	1	3	4	4	3	3	3	3	4
chr01_76918281	chr01	76918281	candidate_SNP:76918280-76918281	3	4	3	4	4	4	3	4	4	4	4	4	3	4	4	4	3	4	2	3	4	3	4	3	3	4	4	3	3	4	4	3	4	4	3	4	4	3	3	4	4	2	2	3	4	2
chr01_76921216	chr01	76921216	ST4.03ch01_76087098	1	3	1	3	0	1	1	2	1	0	2	1	1	0	1	3	2	2	1	0	3	1	2	2	1	3	3	1	1	2	3	1	2	1	1	3	2	2	1	0	2	0	0	1	1	2
chr01_76923166	chr01	76923166	ST4.03ch01_76089048	4	3	4	3	1	2	3	2	4	3	2	3	3	3	2	4	2	3	3	3	4	4	4	3	4	4	3	2	3	3	3	3	4	3	4	2	2	2	3	4	4	3	3	3	3	4
chr01_76923231	chr01	76923231	ST4.03ch01_76089113	4	3	4	4	1	2	3	2	4	3	1	3	3	3	2	4	2	3	3	3	4	4	4	3	4	4	3	2	3	3	3	3	4	3	4	2	2	2	2	4	4	3	3	3	3	4
chr01_76928189	chr01	76928189	ST4.03ch01_76094071	3	3	4	4	1	3	3	3	4	2	3	3	3	3	3	4	3	3	3	2	4	4	2	4	4	4	2	2	2	2	2	2	4	3	4	2	3	2	3	4	4	2	3	4	4	4
chr01_76928799	chr01	76928799	candidate_SNP:76928798-76928799	4	4	4	4	4	3	4	3	4	4	3	4	4	4	3	4	4	4	4	4	4	4	4	4	4	4	4	4	4	4	4	4	4	4	4	4	4	4	4	4	4	4	4	3	3	4
chr01_76930391	chr01	76930391	candidate_SNP:76930390-76930391	4	3	3	4	1	3	3	3	4	3	3	3	3	2	2	4	4	3	1	2	4	4	3	2	4	4	1	1	3	4	4	3	4	3	4	3	2	2	3	4	4	3	2	3	4	4
chr01_76979338	chr01	76979338	ST4.03ch01_76145596	3	3	4	4	2	4	4	4	4	3	4	4	3	3	3	4	3	3	2	4	4	4	3	4	4	4	3	4	4	3	3	3	4	4	4	4	4	3	2	4	4	3	3	4	4	4
chr01_76992799	chr01	76992799	candidate_SNP:76992798-76992799	3	2	2	3	1	0	1	0	0	0	2	3	3	0	0	3	2	2	0	0	3	1	0	3	0	3	3	0	0	2	1	0	4	2	1	2	3	0	2	1	3	2	0	2	2	0
chr01_76994770	chr01	76994770	candidate_SNP:76994769-76994770	4	4	4	4	4	4	4	4	4	4	4	4	4	4	4	4	4	4	4	4	4	4	4	4	4	4	4	3	4	4	4	4	4	4	4	4	4	4	4	4	4	4	4	4	4	4
chr01_77013733	chr01	77013733	solcap_snp_c2_52789	3	3	4	4	2	4	4	4	4	2	3	4	3	3	3	4	3	2	2	4	4	4	3	4	4	4	4	4	4	3	3	3	4	4	4	4	4	2	3	4	4	3	3	4	4	4
chr01_77038297	chr01	77038297	solcap_snp_c2_52792	3	4	2	3	4	4	3	4	4	4	3	3	1	4	4	3	3	3	4	4	3	3	4	3	4	4	2	4	3	4	4	4	2	2	3	3	3	4	2	3	3	2	3	1	3	4
chr01_77040797	chr01	77040797	candidate_SNP:77040796-77040797	1	4	0	4	4	4	1	4	4	4	4	4	4	4	4	4	1	4	1	4	4	1	4	4	0	4	4	4	4	4	4	2	4	4	1	3	4	2	3	4	4	2	1	4	4	0
chr01_77042392	chr01	77042392	candidate_SNP:77042391-77042392	0	2	0	4	0	0	0	0	4	0	0	1	0	0	0	4	0	1	0	0	4	1	0	1	0	4	1	0	3	1	2	0	4	0	2	1	1	0	2	4	4	0	0	0	1	0
chr01_77123399	chr01	77123399	PotVar0110417	2	4	1	3	4	4	1	4	4	4	3	3	2	4	4	3	2	3	2	4	3	3	4	3	3	4	2	4	3	4	4	3	1	2	2	3	3	3	2	3	3	2	2	1	4	3
chr01_77123851	chr01	77123851	PotVar0110391	1	3	1	2	1	1	0	1	4	1	1	2	0	2	2	2	1	2	0	3	3	3	3	2	3	2	1	1	3	3	3	1	2	1	2	1	2	0	2	2	3	1	1	0	3	3
chr01_77136311	chr01	77136311	solcap_snp_c2_56862	2	3	4	4	2	3	4	4	4	2	2	4	3	4	3	4	3	3	2	4	4	4	2	3	4	3	4	2	4	4	4	3	4	4	3	4	3	2	4	4	4	3	4	3	3	4
chr01_77137879	chr01	77137879	solcap_snp_c1_16432	2	3	4	4	1	1	4	1	4	2	1	3	3	3	1	4	3	3	2	3	4	4	3	3	4	3	2	2	4	3	3	1	4	2	4	3	3	2	4	4	4	3	2	3	3	4
chr01_77138463	chr01	77138463	solcap_snp_c1_16435	3	4	3	4	4	4	3	4	4	4	4	4	4	4	4	4	3	4	2	4	4	3	4	4	3	4	4	4	4	4	4	3	4	4	3	4	4	3	4	4	4	4	3	4	4	3
chr01_77142393	chr01	77142393	candidate_SNP:77142392-77142393	3	3	4	4	1	2	4	1	4	2	1	3	3	3	2	4	3	3	2	3	4	4	3	3	4	3	4	3	3	3	3	2	4	3	4	3	3	1	4	4	4	3	3	3	3	4
chr01_77148842	chr01	77148842	ST4.03ch01_76314883	3	4	3	4	4	4	2	4	4	4	4	4	3	4	4	4	3	4	2	4	4	3	4	4	3	4	4	4	4	4	4	3	4	4	3	4	4	3	3	4	4	3	2	3	4	3
chr01_77149581	chr01	77149581	candidate_SNP:77149580-77149581	4	4	4	4	4	2	3	3	4	4	4	4	4	4	4	4	4	4	4	3	4	4	4	3	4	4	3	3	4	4	4	4	4	2	4	4	3	4	4	4	4	4	4	4	4	4
chr01_77154400	chr01	77154400	candidate_SNP:77154399-77154400	1	3	NA	4	2	4	4	4	4	2	2	4	3	2	3	4	3	1	2	4	4	4	3	4		4	4	4	4	2	3	3	4	4	4	4	4	2	4	4	4	3	3	4	4	NA
chr01_77176796	chr01	77176796	candidate_SNP:77176795-77176796	1	3	1	3	1	1	0	1	4	2	1	2	0	3	2	3	1	1	0	2	3	3	3	2	3	3	1	1	2	3	3	1	2	1	2	3	2	0	3	3	3	1	2	0	2	2
chr01_77207778	chr01	77207778	solcap_snp_c2_2431	3	4	3	4	4	4	2	4	4	4	4	4	4	4	4	4	3	4	2	3	4	3	4	4	3	4	4	3	4	4	4	3	4	4	3	4	4	3	4	4	4	4	3	4	4	2
chr01_77208788	chr01	77208788	candidate_SNP:77208787-77208788	2	1	3	3	0	0	1	0	1	0	2	1	2	0	0	3	1	2	0	0	3	2	0	2	0	3	2	0	2	1	1	0	4	2	2	1	1	0	3	3	3	1	1	2	1	0
chr01_77241044	chr01	77241044	solcap_snp_c2_2509	0	3	1	3	1	2	0	3	4	3	2	2	1	3	3	3	1	2	0	1	3	2	3	2	2	3	1	1	2	3	3	1	1	2	2	2	2	0	3	4	3	3	1	1	4	2
chr01_77266399	chr01	77266399	candidate_SNP:77266398-77266399	4	4	4	4	4	2	3	3	4	4	3	4	4	4	3	4	4	4	4	3	4	4	4	3	4	4	3	3	3	4	4	4	4	3	4	3	3	4	4	4	4	4	4	3	3	4
chr01_77281559	chr01	77281559	candidate_SNP:77281558-77281559	3	4	1	4	2	2	3	1	4	2	0	2	1	3	3	2	2	1	4	4	2	4	3	0	4	2	1	3	0	3	2	1	3	2	4	2	3	1	2	2	3	1	2	3	2	4
chr01_77289503	chr01	77289503	ST4.03ch01_76455536	3	3	4	4	2	3	3	3	4	2	3	4	3	3	3	4	3	3	2	3	4	4	3	3	4	3	3	3	3	3	3	3	4	3	4	3	3	2	4	4	4	3	3	4	4	4
chr01_77293248	chr01	77293248	solcap_snp_c1_568	3	4	3	4	1	1	2	2	4	2	2	3	3	3	3	2	2	1	3	3	4	3	3	1	4	4	1	2	1	2	4	3	3	0	4	3	3	2	3	3	2	2	3	3	3	4
chr01_77297581	chr01	77297581	candidate_SNP:77297580-77297581	4	3	3	3	1	1	3	3	4	4	3	3	4	4	4	4	4	1	4	4	4	4	4	1	4	4	2	4	2	4	4	3	4	1	4	3	4	1	4	4	3	4	4	4	4	4
chr01_77309811	chr01	77309811	PotVar0110364	3	3	4	4	2	4	4	4	4	2	3	4	3	3	3	4	3	3	3	4	4	4	3	4	4	3	4	4	4	3	3	2	4	4	4	4	4	3	4	4	4	3	3	4	4	4
chr01_77313207	chr01	77313207	PotVar0110307	3	4	4	4	1	4	4	4	4	1	3	4	3	3	3	4	3	3	2	4	4	4	3	4	3	3	4	4	4	3	3	3	4	4	4	4	4	2	4	4	4	2	3	4	4	4
chr01_77313265	chr01	77313265	PotVar0110305	3	4	4	4	1	1	3	1	4	1	2	3	3	3	2	4	3	3	2	3	4	4	3	3	4	3	3	2	3	3	3	2	4	3	4	3	3	2	4	4	4	2	3	3	3	4
chr01_77314512	chr01	77314512	PotVar0110247	4	4	3	3	4	4	2	4	4	4	3	3	4	4	4	3	3	3	4	4	2	4	4	3	4	4	3	4	2	4	4	4	2	2	4	3	3	4	4	4	3	4	4	4	4	4
chr01_77314661	chr01	77314661	solcap_snp_c1_594	3	4	3	3	2	2	2	2	4	3	2	3	3	3	3	3	2	3	3	3	4	4	3	3	4	3	2	2	2	3	4	2	3	2	4	2	2	2	4	2	3	2	3	2	3	4
chr01_77315810	chr01	77315810	ST4.03ch01_76481843	4	4	2	3	2	2	2	2	4	4	2	2	2	4	4	3	3	3	3	3	2	4	4	3	4	4	1	2	2	4	4	3	2	1	3	2	3	3	4	2	2	3	4	2	2	4
chr01_77315825	chr01	77315825	ST4.03ch01_76481858	3	3	2	3	1	2	2	1	4	1	1	2	2	3	4	3	2	1	2	2	2	4	3	3	4	3	1	2	2	3	2	1	2	1	3	2	3	1	4	2	2	1	2	2	2	4
chr01_77320642	chr01	77320642	solcap_snp_c2_2307	3	3	4	4	1	2	3	1	4	2	2	3	3	3	2	4	3	3	1	4	4	4	3	3	4	3	3	2	3	3	3	2	4	2	4	3	3	1	4	4	4	3	3	3	3	4
chr01_77320967	chr01	77320967	ST4.03ch01_76487000	2	3	4	4	2	4	4	4	4	2	3	4	3	3	3	4	3	3	2	4	4	4	3	4	4	3	4	4	4	3	3	2	4	4	4	4	4	2	4	4	4	3	3	4	4	4
chr01_77324787	chr01	77324787	candidate_SNP:77324786-77324787	4	3	4	4	1	0	2	0	4	3	0	3	3	3	3	4	4	4	2	3	4	4	4	2	4	3	3	2	3	2	3	3	4	3	4	3	4	1	4	4	4	3	3	4	2	4
chr01_77345109	chr01	77345109	solcap_snp_c1_641	4	4	4	4	4	4	4	4	4	4	4	3	4	3	3	4	4	4	4	4	4	4	4	4	4	3	4	4	4	4	4	4	4	4	4	4	4	3	4	4	4	4	3	3	4	4
chr01_77346037	chr01	77346037	ST4.03ch01_76512175	3	3	4	4	2	4	4	4	4	2	3	4	3	2	3	4	3	3	2	4	4	4	3	4	4	2	4	4	4	3	3	3	4	4	4	4	4	2	4	4	4	3	3	4	4	4
chr01_77391866	chr01	77391866	candidate_SNP:77391865-77391866	4	4	3	4	3	3	3	3	4	4	2	3	4	4	4	4	3	4	4	4	3	4	4	4	4	4	2	4	4	4	4	3	4	4	3	4	3	3	4	4	4	4	4	4	4	4
chr01_77439989	chr01	77439989	candidate_SNP:77439988-77439989	3	3	4	4	2	4	4	4	4	2	3	4	3	3	3	4	3	3	3	4	4	4	3	4	4	3	4	4	4	3	4	3	4	4	4	4	4	2	4	4	4	3	3	4	3	4
chr01_77446854	chr01	77446854	ST4.03ch01_76603732	4	4	3	2	4	4	4	4	4	4	4	4	2	4	4	3	4	3	4	4	2	4	4	2	4	4	4	4	3	4	4	4	3	2	4	2	4	4	4	1	2	3	4	3	4	4
chr01_77448795	chr01	77448795	candidate_SNP:77448794-77448795	4	4	4	4	4	3	4	3	4	4	3	4	4	4	3	4	4	4	4	4	4	4	4	4	4	4	4	4	4	4	4	4	4	4	4	4	4	4	4	4	4	4	4	3	3	4
chr01_77455191	chr01	77455191	candidate_SNP:77455190-77455191	3	3	4	4	2	3	4	2	4	3	2	3	3	3	3	4	3	2	2	4	4	4	3	4	4	3	4	3	4	3	3	1	4	4	4	4	4	1	4	4	4	3	3	3	3	4
chr01_77459914	chr01	77459914	candidate_SNP:77459913-77459914	3	3	3	3	3	2	3	2	1	2	2	3	3	1	2	3	3	3	4	1	3	2	1	2	1	4	3	1	1	2	2	3	4	3	2	2	2	4	3	3	3	3	3	3	3	2
chr01_77547983	chr01	77547983	candidate_SNP:77547982-77547983	2	3	2	3	3	1	1	2	1	2	3	3	2	1	1	3	3	3	2	0	3	1	1	2	0	4	3	1	1	2	2	2	3	2	2	2	2	2	2	3	3	2	1	1	3	0
chr01_77589628	chr01	77589628	solcap_snp_c2_57525	3	3	2	3	3	1	2	2	1	1	4	3	1	1	1	2	1	3	2	0	2	1	0	2	2	4	3	0	1	1	1	3	4	3	2	3	2	3	2	3	2	1	1	2	3	0
chr01_77591398	chr01	77591398	ST4.03ch01_76885783	3	3	2	4	2	2	3	2	4	2	1	2	2	4	2	4	3	3	1	4	4	4	3	4	4	4	4	4	4	2	3	3	3	4	4	4	4	2	3	4	4	3	3	3	3	4
chr01_77612707	chr01	77612707	candidate_SNP:77612706-77612707	4	2	3	1	4	4	4	4	4	4	4	3	3	4	4	1	4	3	4	4	3	4	4	2	4	1	3	4	3	4	4	4	3	2	4	2	3	4	4	3	3	3	4	3	4	4
chr01_77616331	chr01	77616331	PotVar0028728	3	3	4	4	2	4	4	4	4	2	3	4	3	3	3	4	3	3	2	4	4	4	3	4	4	3	4	4	4	3	3	3	4	4	4	4	4	2	4	4	4	3	3	4	3	4
chr01_77616606	chr01	77616606	PotVar0028742	3	3	4	4	2	4	4	4	4	2	3	4	3	3	3	4	3	3	2	4	4	4	3	4	4	3	4	4	4	3	3	3	4	4	4	4	4	3	4	4	4	3	3	4	3	4
chr01_77622857	chr01	77622857	ST4.03ch01_76917165	2	2	3	4	1	2	3	2	4	2	2	3	2	4	2	4	4	2	2	4	4	4	3	4	4	2	4	4	4	3	3	2	3	4	4	4	4	2	3	4	4	3	3	3	2	4
chr01_77641570	chr01	77641570	candidate_SNP:77641569-77641570	2	3	3	4	1	3	3	2	4	2	2	4	3	3	2	4	3	3	1	4	4	4	3	4	4	3	4	3	4	3	3	3	3	4	4	4	4	1	3	4	4	3	3	3	2	4
chr01_77642370	chr01	77642370	candidate_SNP:77642369-77642370	4	4	3	4	4	4	3	4	3	4	3	3	4	4	4	4	3	4	4	4	3	3	4	4	1	4	2	4	4	3	3	4	3	4	2	4	3	4	2	3	4	4	4	4	2	4
chr01_77644790	chr01	77644790	candidate_SNP:77644789-77644790	3	3	4	4	2	4	4	4	4	2	3	4	3	3	3	4	3	3	2	4	4	4	2	4	4	3	4	4	4	3	3	3	4	4	4	4	4	2	4	4	4	3	3	4	3	4
chr01_77662566	chr01	77662566	solcap_snp_c2_2421	2	3	3	4	1	2	3	2	4	2	2	3	3	3	2	4	3	2	2	4	4	4	3	4	4	3	4	3	4	3	2	1	4	4	4	4	4	1	3	4	4	2	3	3	2	4
chr01_77663478	chr01	77663478	solcap_snp_c2_2423	3	1	2	1	1	2	3	2	4	2	2	2	2	3	2	1	3	1	1	4	3	4	3	2	4	0	3	3	2	3	3	2	1	1	4	2	3	1	3	3	2	2	3	2	2	4
chr01_77663991	chr01	77663991	candidate_SNP:77663990-77663991	3	3	4	4	1	4	4	4	4	2	3	4	3	2	3	4	3	4	2	4	4	4	3	4	4	3	3	4	4	2	2	3	4	4	4	4	4	1	4	4	4	2	3	4	4	4
chr01_77678384	chr01	77678384	candidate_SNP:77678383-77678384	3	1	2	2	3	3	2	3	4	4	2	2	3	4	3	1	4	1	2	4	2	3	4	3	4	0	2	3	3	4	4	4	1	1	4	2	4	4	2	3	1	3	4	1	3	4
chr01_77710298	chr01	77710298	candidate_SNP:77710297-77710298	4	4	3	4	4	4	4	4	3	4	3	4	4	4	4	4	3	4	4	4	4	2	4	4	2	4	3	4	4	1	2	4	3	4	2	3	2	4	2	4	4	4	4	4	4	4
chr01_77712755	chr01	77712755	ST4.03ch01_77007901	4	4	3	4	4	4	4	4	3	4	4	4	4	4	4	4	3	4	4	4	4	3	4	4	2	4	3	4	4	2	2	4	3	4	3	4	3	4	3	3	4	4	4	4	4	4
chr01_77716233	chr01	77716233	candidate_SNP:77716232-77716233	2	3	2	4	1	2	3	2	4	2	2	4	3	2	2	4	3	3	2	4	4	4	3	3	3	3	3	3	3	2	2	3	2	3	3	3	4	2	3	3	4	3	3	3	2	4
chr01_77752397	chr01	77752397	PotVar0028802	2	4	4	4	3	4	4	4	4	2	3	4	4	4	3	4	3	3	3	4	4	4	4	3	4	3	4	1	4	4	3	3	4	3	4	3	4	3	4	4	4	3	2	4	3	4
chr01_77754381	chr01	77754381	candidate_SNP:77754380-77754381	3	2	2	4	1	1	4	3	3	3	1	3	3	3	3	4	4	3	3	4	4	2	4	3	1	2	1	2	3	1	1	3	2	4	1	4	2	2	3	3	4	2	3	3	3	4
chr01_77760351	chr01	77760351	solcap_snp_c2_2450	3	3	2	4	1	2	4	3	2	2	3	4	3	3	2	4	2	3	2	4	4	3	2	4	1	3	1	2	4	1	1	2	3	4	2	2	3	1	3	3	4	3	3	4	3	4
chr01_77761250	chr01	77761250	ST4.03ch01_77056886	2	2	3	4	1	2	3	2	3	2	2	3	3	3	3	4	2	2	2	4	4	3	3	3	2	2	2	2	3	1	1	2	1	3	1	3	3	1	2	3	4	3	2	3	2	4
chr01_77765565	chr01	77765565	solcap_snp_c1_698	2	2	3	4	1	2	4	2	3	2	2	3	3	3	2	4	2	3	2	4	4	3	3	3	2	3	2	2	4	2	1	3	2	3	2	3	3	1	2	3	4	3	3	3	3	4
chr01_77780532	chr01	77780532	ST4.03ch01_77076004	3	3	3	3	2	2	3	2	1	1	3	3	3	1	1	3	4	2	4	2	3	2	1	4	3	4	4	1	3	3	2	2	4	4	3	2	2	4	4	3	3	2	3	4	3	2
chr01_77784866	chr01	77784866	solcap_snp_c2_2451	2	2	3	4	1	1	4	2	2	3	2	2	3	3	2	4	2	3	3	4	4	2	3	3	2	2	2	2	3	1	1	2	2	3	2	3	3	1	2	2	4	3	3	2	2	4
chr01_77785571	chr01	77785571	candidate_SNP:77785570-77785571	1	2	3	4	1	2	4	2	3	1	2	3	3	3	2	4	3	2	2	4	4	3	3	2	3	1	3	2	4	1	1	2	2	3	2	3	3	1	1	3	4	3	2	3	2	4
chr01_77790493	chr01	77790493	candidate_SNP:77790492-77790493	2	2	3	4	1	3	4	2	3	2	2	3	3	3	3	4	2	2	3	4	4	3	3	3	2	2	3	2	3	2	1	2	2	3	2	3	3	1	2	3	4	3	3	3	2	4
chr01_77793597	chr01	77793597	candidate_SNP:77793596-77793597	1	1	3	4	0	0	4	0	1	0	2	2	2	1	0	4	1	2	2	4	4	2	1	3	1	2	2	0	3	1	0	2	2	3	1	2	2	1	1	2	4	2	3	3	2	4
chr01_77797591	chr01	77797591	candidate_SNP:77797590-77797591	4	4	4	3	3	3	3	2	2	2	3	3	3	2	1	3	3	3	4	2	3	3	1	4	3	4	4	2	3	2	3	3	4	4	2	3	2	4	3	4	3	2	3	4	4	2
chr01_77824341	chr01	77824341	PotVar0028839	1	4	4	4	3	4	NA	4	4	4	3	4	4	3	4	4	4	4		4	4	4	4	4	4	4	4	4	4	4	3	4	4	4	4	4	4	2	NA	4	4	4	4	4	4	4
chr01_77825267	chr01	77825267	PotVar0028895	3	3	4	4	2	4	4	4	4	3	3	4	3	3	3	4	3	3	2	4	4	4	3	3	4	3	3	3	2	3	3	3	4	3	4	3	4	3	4	4	4	3	3	4	3	4
chr01_77826655	chr01	77826655	PotVar0028927	3	4	4	4	4	3	4	3	4	4	3	4	4	4	3	4	4	4	4	4	4	4	4	4	4	4	4	4	4	4	4	4	3	4	4	4	4	4	3	4	4	4	4	3	3	4
chr01_77827999	chr01	77827999	candidate_SNP:77827998-77827999	4	4	3	4	3	3	4	3	3	4	4	3	4	4	4	4	3	4	4	4	4	3	4	4	2	4	3	4	4	2	3	3	3	4	2	4	3	3	3	3	4	4	4	4	4	4
chr01_77839419	chr01	77839419	ST4.03ch01_77146438	3	3	3	3	3	3	3	3	3	3	3	3	3	2	2	3	3	3	4	2	3	3	2	4	4	4	4	3	3	3	3	3	4	4	3	3	3	4	3	3	3	3	3	4	3	2
chr01_77839587	chr01	77839587	ST4.03ch01_77146606	2	2	3	3	2	2	3	2	2	2	2	3	2	2	2	3	3	3	2	2	3	3	2	3	3	2	3	2	2	2	2	2	3	3	3	2	2	3	3	3	3	2	2	3	2	2
chr01_77839647	chr01	77839647	ST4.03ch01_77146666	1	1	2	3	0	0	3	0	0	0	1	2	2	0	0	3	2	2	2	1	3	1	0	3	2	2	2	0	1	0	0	1	2	3	1	1	1	2	1	2	2	1	1	2	1	2
chr01_77847509	chr01	77847509	solcap_snp_c1_705	4	4	3	4	4	4	4	4	3	4	4	4	4	4	4	4	3	4	4	4	4	3	4	4	2	4	3	4	4	2	2	4	3	4	2	4	3	4	3	3	4	4	3	4	4	4
chr01_77850624	chr01	77850624	solcap_snp_c1_706	3	3	4	4	3	4	4	4	4	1	2	3	3	3	3	4	3	3	1	4	4	4	3	3	4	3	3	2	3	3	3	3	4	3	4	3	4	3	4	4	4	3	3	4	3	4
chr01_77883067	chr01	77883067	ST4.03ch01_77190593	3	3	2	3	3	2	3	3	2	2	3	3	2	2	3	3	3	2	4	1	3	2	2	4	3	4	4	2	2	3	3	2	3	2	3	3	2	4	3	2	3	2	3	3	3	2
chr01_77883237	chr01	77883237	solcap_snp_c2_2463	3	3	3	4	2	4	4	4	4	2	4	3	4	3	3	4	3	3	3	4	4	4	3	3	4	3	3	3	3	3	3	3	3	3	4	3	4	2	3	4	4	3	3	3	3	4
chr01_77883265	chr01	77883265	solcap_snp_c2_2464	2	2	2	4	1	2	3	1	3	2	3	3	3	3	2	4	2	3	2	4	4	3	3	3	2	1	2	2	2	2	1	3	2	3	2	3	3	2	2	3	4	3	2	3	2	4
chr01_77883814	chr01	77883814	solcap_snp_c2_2465	4	4	3	4	4	4	4	4	3	4	4	4	4	4	4	4	4	4	3	4	4	4	4	4	2	4	3	4	4	3	3	4	3	4	2	4	3	4	4	3	4	4	3	4	4	4
chr01_77883824	chr01	77883824	solcap_snp_c2_2466	1	2	3	4	1	2	4	4	4	3	2	3	3	3	2	4	2	3	1	4	4	4	3	3	2	2	1	2	2	0	2	3	3	3	2	3	3	1	3	4	4	3	3	4	2	4
chr01_77884924	chr01	77884924	solcap_snp_c2_2467	3	3	4	4	2	4	4	4	4	2	3	3	3	3	3	4	3	3	1	4	4	4	3	3	4	3	3	2	3	3	3	3	4	3	4	3	4	2	4	4	4	3	3	4	3	4
chr01_77896097	chr01	77896097	ST4.03ch01_77203983	4	4	4	4	4	4	4	4	4	4	4	4	4	4	4	4	4	4	4	4	4	4	4	4	4	4	4	4	4	4	4	4	4	4	4	4	4	4	4	4	4	4	4	4	4	4
chr01_77903821	chr01	77903821	candidate_SNP:77903820-77903821	3	3	4	4	2	4	4	4	4	3	3	3	3	3	3	4	3	3	2	4	4	4	3	3	4	3	3	2	3	3	4	3	4	3	4	3	4	2	4	4	4	3	3	4	3	4
chr01_77955155	chr01	77955155	candidate_SNP:77955154-77955155	1	1	0	2	0	0	2	0	0	0	1	2	2	0	0	2	1	1	1	1	3	2	0	2	2	1	2	0	1	0	0	1	1	1	3	1	1	1	1	2	2	1	2	1	1	2
chr01_77955964	chr01	77955964	candidate_SNP:77955963-77955964	1	1	0	2	0	0	2	0	0	0	1	2	2	0	0	2	1	1	2	1	2	1	0	2	1	2	2	0	1	0	0	1	1	1	1	1	1	2	1	1	2	1	1	1	1	2
chr01_77970383	chr01	77970383	candidate_SNP:77970382-77970383	1	1	0	2	1	0	3	0	0	0	2	3	1	0	0	1	2	1	4	1	2	1	0	2	2	2	4	0	1	0	0	2	1	1	1	1	1	4	2	1	2	1	2	1	2	2
chr01_77994350	chr01	77994350	solcap_snp_c2_2487	1	4	4	4	1	4	4	4	4	2	3	2	3	4	3	4	3	2	2	4	4	4	3	4	4	3	3	0	4	4	3	3	4	2	4	3	4	2	4	4	4	3	3	4	3	4
chr01_78010094	chr01	78010094	solcap_snp_c2_2494	2	3	2	3	3	2	3	2	2	1	3	3	2	1	2	2	3	2	4	2	3	2	1	3	3	4	4	1	1	3	3	3	3	2	3	2	2	4	3	2	2	2	3	3	2	2
chr01_78036750	chr01	78036750	candidate_SNP:78036749-78036750	4	3	4	4	4	4	4	4	4	4	4	4	4	4	4	4	4	4	4	4	4	4	4	4	4	3	4	4	4	4	4	4	4	4	4	4	4	4	4	4	4	4	4	4	4	4
chr01_78072472	chr01	78072472	candidate_SNP:78072471-78072472	2	2	1	2	2	2	3	3	3	3	3	3	1	3	1	3	2	3	1	3	4	3	3	2	2	2	2	2	2	2	2	2	1	1	3	2	3	2	2	2	2	3	3	2	2	4
chr01_78091467	chr01	78091467	solcap_snp_c1_737	3	2	3	1	3	3	3	3	1	2	2	1	3	1	2	1	3	2	4	2	1	2	1	3	3	2	2	2	3	3	3	2	3	3	3	3	2	4	3	3	2	3	3	4	3	2
chr01_78121316	chr01	78121316	ST4.03ch01_77431168	1	0	1	1	0	1	2	1	0	0	0	0	2	0	0	1	1	1	1	2	1	1	0	2	1	0	0	0	2	0	0	0	1	2	1	1	1	0	1	2	2	2	2	3	1	2
chr01_78128255	chr01	78128255	candidate_SNP:78128254-78128255	2	0	0	0	0	1	1	1	0	0	NA	0	1	0	0	0	2		1	1	0	1	0	0	1	0	0	0	0	0	0	0	0	0	1	0	1	1	2	0	1	2	2	2	1	1
chr01_78139190	chr01	78139190	candidate_SNP:78139189-78139190	3	3	4	4	2	4	4	4	4	2	3	2	3	3	3	4	3	3	2	4	4	4	3	3	4	3	3	2	3	3	3	3	4	3	4	3	4	2	4	4	4	3	3	4	3	4
chr01_78184797	chr01	78184797	candidate_SNP:78184796-78184797	2	2	1	3	2	2	2	2	2	2	2	2	3	2	2	2	2	2	2	3	2	2	2	3	1	2	2	2	3	1	1	1	2	3	1	3	2	2	1	2	3	3	3	2	2	3
chr01_78205098	chr01	78205098	solcap_snp_c1_749	2	3	4	4	2	4	4	4	4	2	3	3	3	3	3	4	2	3	2	4	4	4	2	3	4	3	3	2	3	3	3	3	4	3	4	3	4	2	4	4	4	3	2	4	3	4
chr01_78207189	chr01	78207189	candidate_SNP:78207188-78207189	3	4	4	4	4	4	4	4	4	4	4	4	4	4	4	4	4	4	4	4	4	4	4	4	4	4	4	4	4	4	4	4	3	4	4	4	4	4	3	4	4	4	4	3	4	4
chr01_78216346	chr01	78216346	solcap_snp_c1_758	3	2	3	1	3	3	3	3	1	2	2	1	3	1	1	1	3	2	4	2	1	2	1	3	3	2	2	2	3	3	3	2	3	3	3	2	2	4	3	3	2	2	3	4	3	2
chr01_78220796	chr01	78220796	candidate_SNP:78220795-78220796	3	2	4	4	2	3	4	2	4	3	3	4	3	2	3	4	3	2	3	4	4	4	4	3	4	3	3	3	2	3	3	3	3	1	4	3	4	3	4	4	4	3	2	3	3	4
chr01_78244426	chr01	78244426	ST4.03ch01_77554731	1	1	0	0	2	1	2	1	0	2	1	1	1	1	1	0	1	1	3	2	1	1	1	2	1	1	1	2	2	1	1	1	0	1	1	1	1	2	1	1	2	2	3	1	2	2
chr01_78244434	chr01	78244434	ST4.03ch01_77554739	3	4	2	4	3	3	3	3	2	4	4	4	3	4	4	4	2	4	3	4	4	3	4	4	2	4	3	4	4	2	2	3	3	4	2	4	3	3	3	3	4	4	4	4	4	4
chr01_78246630	chr01	78246630	ST4.03ch01_77556935	4	4	4	4	4	3	4	3	4	4	3	4	4	4	3	4	4	4	4	4	4	4	4	4	4	4	4	4	4	4	4	4	3	4	4	4	4	4	3	4	4	4	4	2	3	4
chr01_78248256	chr01	78248256	solcap_snp_c2_2565	3	3	4	4	3	4	4	4	4	2	1	2	4	2	3	4	2	4	2	4	4	4	3	3	4	3	4	2	3	4	4	2	4	4	4	3	4	3	4	4	4	3	2	4	4	4
chr01_78316794	chr01	78316794	candidate_SNP:78316793-78316794	2	2	2	4	1	1	3	1	2	1	1	3	2	2	1	4	1	3	2	4	4	3	3	3	2	2	2	2	3	1	1	2	2	3	3	3	2	1	2	3	4	3	3	3	2	4
chr01_78345587	chr01	78345587	candidate_SNP:78345586-78345587	4	4	4	4	4	3	3	3	4	3	4	4	4	4	3	4	4	4	4	3	4	4	3	4	4	4	4	4	4	4	4	4	4	4	4	4	3	4	4	4	4	4	4	4	4	4
chr01_78366060	chr01	78366060	ST4.03ch01_77678606	3	3	4	4	2	4	4	3	4	2	2	3	3	3	2	4	2	3	2	4	4	4	3	4	4	3	4	3	4	3	3	3	3	4	4	4	4	2	3	4	4	3	3	3	3	4
chr01_78369746	chr01	78369746	solcap_snp_c1_543	2	4	2	4	4	3	3	4	3	3	3	4	2	3	4	4	3	4	2	4	4	3	4	2	1	4	2	3	2	2	2	4	1	2	1	2	2	4	4	2	4	4	4	3	4	4
chr01_78403961	chr01	78403961	candidate_SNP:78403960-78403961	2	2	2	4	1	2	3	2	3	2	2	3	2	3	2	4	1	3	1	4	4	3	3	3	3	2	2	3	3	1	1	2	2	3	2	3	3	1	2	3	4	3	3	2	3	4
chr01_78412767	chr01	78412767	candidate_SNP:78412766-78412767	4	4	4	4	4	4	4	4	4	4	4	4	4	4	4	4	4	4	4	4	4	4	4	3	4	4	4	4	4	4	4	4	4	3	4	4	4	4	4	4	4	4	4	4	4	4
chr01_78424951	chr01	78424951	solcap_snp_c2_2201	4	2	4	4	2	3	4	2	4	2	2	3	3	2	3	4	2	3	3	4	4	4	3	3	4	2	3	3	3	3	3	3	3	3	4	3	3	2	3	4	4	3	3	2	2	4
chr01_78466395	chr01	78466395	candidate_SNP:78466394-78466395	3	4	3	4	4	4	3	4	3	4	4	4	3	4	4	4	3	4	3	4	4	3	4	4	3	4	3	4	4	3	3	4	3	4	3	4	4	4	3	3	4	4	4	4	4	4
chr01_78476769	chr01	78476769	candidate_SNP:78476768-78476769	4	4	4	4	4	4	4	4	4	4	4	4	4	4	4	4	4	4	4	4	4	4	4	4	4	3	4	4	4	4	4	4	4	4	4	4	4	4	4	4	4	4	4	4	4	4
chr01_78479195	chr01	78479195	candidate_SNP:78479194-78479195	4	4	4	4	4	4	4	4	4	4	4	4	4	4	4	4	4	4	4	4	4	4	4	3	4	4	3	3	3	4	4	4	4	3	4	3	3	4	4	4	4	4	4	4	4	4
chr01_78481395	chr01	78481395	solcap_snp_c2_2213	3	4	2	4	3	3	3	3	4	4	4	4	2	4	4	4	3	4	3	4	4	3	4	3	2	4	2	3	2	1	2	3	2	4	2	2	2	3	3	3	4	4	4	4	4	4
chr01_78484550	chr01	78484550	solcap_snp_c2_2215	3	2	2	4	2	3	3	3	3	2	2	3	3	3	3	4	2	3	1	4	4	3	3	3	3	2	2	2	3	2	1	3	2	3	2	3	3	1	3	3	4	3	3	4	2	4
chr01_78485264	chr01	78485264	ST4.03ch01_77799662	3	3	4	4	2	4	4	4	4	2	3	3	3	3	3	4	2	3	2	4	4	4	3	4	4	3	4	3	4	3	3	3	4	4	4	4	4	2	4	4	4	3	3	4	3	4
chr01_78514165	chr01	78514165	solcap_snp_c2_2220	3	3	2	4	3	3	3	3	3	4	4	4	3	4	4	4	3	4	3	4	4	3	4	3	3	3	2	3	3	2	3	3	3	3	2	3	3	3	3	3	4	4	4	4	4	4
chr01_78528780	chr01	78528780	candidate_SNP:78528779-78528780	1	2	2	4	2	2	3	2	3	2	2	2	2	3	2	4	1	2	1	4	4	3	3	3	2	2	3	2	3	1	1	3	2	3	2	3	4	1	2	3	4	3	3	2	2	4
chr01_78532050	chr01	78532050	candidate_SNP:78532049-78532050	1	1	1	3	0	1	2	1	0	1	0	1	0	0	1	3	0	2	1	2	1	1	2	3	1	2	1	0	1	0	0	1	2	3	0	1	1	1	2	1	3	2	1	1	1	3
chr01_78543285	chr01	78543285	solcap_snp_c2_2225	3	3	3	3	3	3	3	3	1	3	2	2	3	1	3	3	3	3	4	3	2	2	3	3	3	4	3	2	2	3	3	3	4	4	3	3	2	4	3	2	3	2	2	3	3	3
chr01_78543974	chr01	78543974	candidate_SNP:78543973-78543974	3	3	4	4	2	3	4	2	4	3	2	3	3	3	2	4	2	3	2	4	4	4	3	4	4	3	4	3	4	2	3	3	3	4	4	4	4	2	3	4	4	3	3	2	2	4
chr01_78545562	chr01	78545562	candidate_SNP:78545561-78545562	4	3	4	4	4	3	4	3	4	4	3	4	4	4	3	4	4	4	4	4	4	4	4	4	4	3	4	4	4	4	4	4	3	4	4	4	4	4	3	4	4	4	4	2	3	4
chr01_78559197	chr01	78559197	candidate_SNP:78559196-78559197	3	3	4	4	2	4	4	4	4	3	3	3	3	3	3	4	2	3	2	4	4	4	2	4	4	3	4	3	4	3	3	3	4	4	4	3	4	2	4	4	4	3	3	4	3	4
chr01_78579974	chr01	78579974	candidate_SNP:78579973-78579974	2	2	3	4	2	3	4	3	3	2	3	4	1	4	3	4	1	3	1	4	4	3	3	2	2	2	2	2	2	1	0	1	3	3	2	3	3	1	2	2	4	4	4	3	3	4
chr01_78599061	chr01	78599061	ST4.03ch01_77915324	3	3	4	4	2	4	4	4	4	3	3	3	3	3	3	4	2	3	2	4	4	4	3	4	4	3	4	3	4	3	3	2	4	4	4	4	4	2	4	4	4	3	3	4	2	4
chr01_78607396	chr01	78607396	solcap_snp_c2_2246	3	3	3	3	3	3	3	3	1	3	2	2	3	2	3	3	3	3	4	2	1	1	3	3	3	4	3	2	1	3	3	3	4	3	2	3	2	4	2	2	2	3	3	4	3	2
chr01_78615919	chr01	78615919	solcap_snp_c2_2251	2	2	3	3	1	3	3	3	1	1	1	1	2	0	2	3	1	3	2	2	1	2	3	3	3	3	3	1	2	2	2	2	4	3	2	3	2	2	3	2	2	2	2	4	2	2
chr01_78625660	chr01	78625660	ST4.03ch01_77941531	4	4	4	4	4	3	4	3	4	4	3	4	4	4	3	4	4	4	4	4	4	4	4	4	4	4	4	4	4	4	4	4	4	4	4	4	4	4	4	4	4	4	4	3	3	4
chr01_78626380	chr01	78626380	ST4.03ch01_77942606	3	3	4	4	2	4	4	4	4	1	3	3	3	3	3	4	2	2	2	4	4	4	3	4	4	3	4	3	4	3	3	3	4	4	4	4	4	2	4	4	4	3	3	4	3	4
chr01_78626799	chr01	78626799	PotVar0029115	4	4	4	4	4	3	4	3	4	3	4	4	4	4	3	4	4	4	4	4	4	4	3	4	4	4	4	4	4	4	4	4	4	4	4	4	4	4	4	4	4	4	4	4	4	4
chr01_78627346	chr01	78627346	PotVar0029142	0	0	0	0	0	1	0	1	0	1	0	0	1	0	1	0	0	0	0	0	0	0	1	0	0	0	0	0	0	0	0	0	0	0	0	0	0	0	0	0	0	1	1	1	0	0
chr01_78628289	chr01	78628289	PotVar0029221	3	3	3	3	3	3	3	3	1	3	1	2	3	1	3	3	3	3	4	2	1	2	3	3	3	4	3	2	2	3	3	3	4	3	2	3	2	4	3	2	2	3	3	4	3	2
chr01_78628879	chr01	78628879	PotVar0029251	4	3	4	4	4	4	4	4	4	4	4	4	4	4	4	4	4	4	3	4	4	4	3	4	4	2	4	4	4	3	3	4	4	4	4	4	4	4	4	4	4	4	4	4	3	4
chr01_78648289	chr01	78648289	solcap_snp_c2_2262	2	2	1	3	1	2	3	2	3	2	2	3	3	3	1	3	2	3	1	4	4	3	3	2	3	2	2	2	2	1	2	3	1	1	3	2	3	2	2	2	4	2	3	1	2	3
chr01_78652229	chr01	78652229	candidate_SNP:78652228-78652229	2	3	2	4	1	3	3	3	3	2	3	3	2	3	3	4	1	3	1	4	4	3	3	3	2	3	2	2	3	1	1	2	3	3	2	3	3	1	3	3	4	3	3	4	3	4
chr01_78671189	chr01	78671189	candidate_SNP:78671188-78671189	3	3	3	3	2	3	4	3	4	2	2	3	2	3	2	3	2	3	2	4	4	4	3	3	4	3	4	3	3	3	3	3	2	3	4	3	4	2	3	3	4	1	2	0	2	4
chr01_78671996	chr01	78671996	candidate_SNP:78671995-78671996	4	4	4	4	4	3	4	3	4	4	3	4	4	4	3	4	4	4	4	4	4	4	4	4	4	4	4	4	4	4	4	4	4	4	4	4	4	4	4	4	4	4	4	3	3	4
chr01_78693965	chr01	78693965	solcap_snp_c2_2273	0	1	0	2	0	0	1	0	0	0	0	1	0	0	0	2	0	1	1	2	1	1	1	1	1	2	1	0	0	0	0	1	1	1	0	1	1	1	1	0	2	0	0	0	1	2
chr01_78719330	chr01	78719330	solcap_snp_c2_2275	1	1	1	3	0	1	2	1	0	0	1	1	1	0	1	3	0	2	1	2	1	2	1	2	1	2	2	0	1	0	0	1	1	2	0	2	1	1	1	1	2	2	0	3	2	2
chr01_78734381	chr01	78734381	candidate_SNP:78734380-78734381	3	4	2	4	3	3	3	3	3	4	3	4	3	4	3	4	2	4	1	4	4	3	4	3	2	4	2	3	3	1	1	3	3	3	2	3	3	2	2	3	4	4	4	3	2	4
chr01_78751987	chr01	78751987	candidate_SNP:78751986-78751987	4	4	4	4	4	4	4	4	4	4	4	4	4	4	4	4	4	4	4	4	4	4	4	3	4	4	3	4	3	4	4	4	4	3	4	4	3	4	3	4	4	4	4	4	4	4
chr01_78761585	chr01	78761585	candidate_SNP:78761584-78761585	3	3	4	4	2	4	4	4	4	2	3	3	3	3	3	4	2	3	2	4	4	4	3	4	4	3	4	3	4	3	3	3	4	4	4	4	4	2	4	4	4	3	3	4	3	4
chr01_78767993	chr01	78767993	candidate_SNP:78767992-78767993	2	2	2	4	2	2	3	2	3	2	2	3	2	3	2	4	1	3	1	4	4	3	3	3	2	2	2	2	3	1	1	2	2	3	2	3	3	1	1	3	4	3	3	2	2	4
chr01_78788000	chr01	78788000	candidate_SNP:78787999-78788000	1	1	2	2	2	2	2	1	3	2	2	2	2	3	2	2	1	1	0	3	3	2	2	2	1	0	2	2	3	1	1	1	1	2	2	2	1	0	1	3	2	3	3	2	2	3
chr01_78822269	chr01	78822269	solcap_snp_c1_590	3	4	4	1	4	4	2	4	4	4	4	4	4	4	4	2	4	3	2	3	3	3	3	3	3	2	3	4	4	4	4	3	3	2	4	3	3	3	4	4	2	4	4	4	4	3
chr01_78825596	chr01	78825596	candidate_SNP:78825595-78825596	3	3	4	4	3	4	4	4	4	3	3	3	3	3	3	4	2	3	2	4	4	4	3	4	4	3	4	3	4	3	3	3	4	4	4	4	4	2	4	4	4	3	3	4	3	4
chr01_78829485	chr01	78829485	ST4.03ch01_78149218	3	4	2	4	4	4	3	4	3	4	4	4	3	4	4	4	4	4	3	4	4	3	4	4	2	4	3	3	4	2	2	4	3	4	3	4	4	4	3	3	4	4	4	4	4	4
chr01_78848703	chr01	78848703	candidate_SNP:78848702-78848703	2	2	2	4	1	2	3	2	3	2	2	3	2	3	2	4	2	3	1	4	4	3	3	3	2	2	2	2	3	1	1	2	2	3	2	3	2	1	1	3	4	3	3	2	2	4
chr01_78856410	chr01	78856410	solcap_snp_c1_607	2	2	3	4	1	1	3	1	2	2	1	3	2	1	2	4	0	2	0	4	4	3	4	3	2	3	2	2	3	1	1	2	2	3	3	3	2	1	2	2	4	2	3	1	1	4
chr01_78863195	chr01	78863195	candidate_SNP:78863194-78863195	4	4	4	4	4	3	4	2	4	4	3	4	4	4	3	4	4	4	4	4	4	4	4	4	4	4	4	4	4	4	4	4	3	4	4	4	4	4	3	4	4	4	3	3	3	4
chr01_78872569	chr01	78872569	solcap_snp_c2_2299	3	2	4	4	2	4	4	4	4	2	3	3	3	3	3	4	1	3	3	4	4	4	3	3	4	2	3	3	3	3	3	3	4	3	3	3	3	2	4	4	4	3	3	4	3	4
chr01_78877595	chr01	78877595	candidate_SNP:78877594-78877595	2	2	1	3	1	1	3	1	3	1	2	3	2	3	1	2	1	3	1	4	4	3	2	2	3	1	2	1	3	2	2	3	1	2	3	2	3	1	2	2	4	2	2	1	1	4
chr01_78896563	chr01	78896563	solcap_snp_c2_2308	4	2	4	4	1	2	4	2	4	2	3	4	4	4	2	4	1	3	4	4	4	4	3	3	4	2	3	3	3	4	4	2	4	3	3	3	3	1	4	4	4	3	3	3	2	4
chr01_78897582	chr01	78897582	candidate_SNP:78897581-78897582	4	2	4	4	1	4	4	4	4	2	4	4	4	4	3	3	2	4	4	4	4	4	3	3	4	2	3	3	4	4	4	4	4	2	4	3	2	1	4	4	4	3	3	3	3	4
chr01_78898386	chr01	78898386	candidate_SNP:78898385-78898386	2	3	2	4	1	1	3	2	3	3	1	3	1	3	2	4	0	3	2	4	4	2	3	3	2	2	2	2	3	1	1	3	2	2	2	3	3	1	2	3	4	3	3	2	2	4
chr01_78899182	chr01	78899182	candidate_SNP:78899181-78899182	4	4	4	4	4	3	4	4	4	4	3	4	4	4	3	4	4	4	4	4	4	4	4	4	4	4	4	4	4	4	4	4	4	4	4	4	4	4	4	4	4	4	4	3	3	4
chr01_78912740	chr01	78912740	candidate_SNP:78912739-78912740	4	3	4	4	3	4	4	4	4	2	4	4	4	4	2	4	1	3	4	4	4	4	3	3	4	2	3	3	3	4	4	3	4	3	2	3	3	2	4	4	4	4	3	4	3	4
chr01_78915584	chr01	78915584	ST4.03ch01_78236656	2	2	1	4	1	3	3	4	3	3	4	3	1	2	4	4	0	4	1	4	4	3	3	2	2	1	1	1	4	0	1	2	3	4	2	3	1	1	4	4	4	3	3	4	3	4
chr01_78915591	chr01	78915591	ST4.03ch01_78236663	3	4	2	4	4	4	3	4	3	4	4	4	4	4	4	4	4	4	4	4	4	3	4	4	2	4	3	3	4	2	2	4	3	4	3	3	3	4	4	4	4	4	4	4	4	4
chr01_78917481	chr01	78917481	candidate_SNP:78917480-78917481	2	1	1	3	1	1	3	1	3	1	2	3	1	3	1	3	1	3	1	4	4	3	2	1	2	2	2	2	2	1	1	2	1	2	2	2	3	1	2	3	4	2	2	1	2	4
chr01_78939200	chr01	78939200	candidate_SNP:78939199-78939200	4	4	4	4	4	3	4	3	4	4	3	4	4	4	3	4	4	4	4	4	4	4	4	4	4	4	4	4	4	4	4	4	4	4	4	4	4	4	4	4	4	4	4	3	3	4
chr01_78955963	chr01	78955963	candidate_SNP:78955962-78955963	4	3	4	4	1	2	4	2	4	2	2	4	4	4	3	4	1	3	4	4	4	4	3	3	4	3	3	3	3	3	3	3	4	3	3	3	3	1	4	4	4	3	3	2	2	4
chr01_78957584	chr01	78957584	candidate_SNP:78957583-78957584	4	3	4	4	1	3	4	3	4	1	3	4	4	4	2	4	2	3	4	4	4	4	4	3	4	2	3	3	3	3	3	2	2	3	3	3	3	1	2	4	4	3	3	2	2	4
chr01_78974369	chr01	78974369	candidate_SNP:78974368-78974369	3	4	4	4	4	4	4	4	4	4	3	3	3	3	4	4	4	4	3	4	4	4	4	4	4	4	4	4	4	3	3	4	4	4	4	4	4	4	4	4	4	4	4	4	4	4
chr01_78979125	chr01	78979125	candidate_SNP:78979124-78979125	4	4	4	4	4	3	4	3	4	4	3	4	4	4	3	4	4	4	4	4	4	4	4	4	4	4	4	4	4	4	4	4	4	4	4	4	4	4	4	4	4	4	4	3	3	4
chr01_78995868	chr01	78995868	ST4.03ch01_78318531	3	3	2	2	3	3	3	3	1	3	2	2	2	1	3	2	3	3	4	2	2	3	3	3	3	4	3	3	2	3	3	2	3	2	2	2	2	4	4	1	2	2	2	3	3	2
chr01_79025547	chr01	79025547	PotVar0029349	3	3	3	3	3	3	3	3	3	3	3	3	3	3	3	3	3	3	3	3	3	3	3	3	3	3	3	3	3	3	3	3	3	3	3	3	3	3	3	3	3	3	3	3	3	3
chr01_79025669	chr01	79025669	PotVar0029355	3	3	3	4	2	2	3	2	3	3	3	3	3	3	3	4	2	3	2	3	4	3	3	3	3	3	3	3	3	3	3	2	3	3	3	3	3	2	3	3	4	3	3	3	3	4
chr01_79026055	chr01	79026055	PotVar0029382	4	2	3	1	4	4	2	4	4	4	4	3	4	4	4	0	4	2	3	3	3	3	3	2	3	2	3	4	3	4	4	3	2	2	4	2	3	3	3	4	2	4	4	4	3	3
chr01_79051992	chr01	79051992	candidate_SNP:79051991-79051992	3	4	3	3	3	3	3	2	1	3	2	2	3	1	3	3	3	3	4	2	1	2	3	4	3	4	3	3	3	3	2	2	4	3	2	3	2	4	4	2	2	3	2	3	3	2
chr01_79059994	chr01	79059994	candidate_SNP:79059993-79059994	4	3	4	4	3	4	4	4	4	2	4	4	4	4	3	4	1	3	4	4	4	4	2	3	4	3	3	3	3	4	4	3	4	3	2	3	3	2	4	4	4	3	3	4	3	4
chr01_79068772	chr01	79068772	candidate_SNP:79068771-79068772	4	3	4	4	4	4	4	4	4	4	4	4	4	4	4	4	4	4	4	4	4	4	4	4	4	3	4	4	4	4	4	4	4	4	4	4	4	4	4	4	4	4	4	4	4	4
chr01_79076793	chr01	79076793	candidate_SNP:79076792-79076793	1	1	0	2	0	0	2	0	0	0	0	1	1	0	0	1	0	1	1	1	1	1	1	3	1	3	1	1	1	0	0	1	1	1	0	1	1	2	1	1	1	1	0	2	0	1
chr01_79099998	chr01	79099998	candidate_SNP:79099997-79099998	4	4	4	4	4	3	4	3	4	4	3	4	4	4	4	4	4	4	4	4	4	4	4	4	4	4	4	4	4	4	4	4	4	4	4	4	4	4	4	4	4	4	4	4	4	4
chr01_79114587	chr01	79114587	solcap_snp_c2_2358	3	3	2	4	1	3	3	3	3	2	4	4	3	4	3	4	1	3	3	4	4	3	3	3	2	2	2	2	3	2	2	2	3	3	2	3	3	1	3	3	4	3	3	4	3	4
chr01_79117440	chr01	79117440	solcap_snp_c2_2360	3	3	2	4	2	4	3	4	3	3	4	4	3	4	3	4	2	2	3	4	4	3	3	3	2	3	3	2	3	2	3	2	3	3	2	2	3	3	3	3	4	3	3	4	3	4
chr01_79125570	chr01	79125570	candidate_SNP:79125569-79125570	4	4	4	4	4	4	4	4	4	4	4	4	3	4	4	4	4	4	4	4	4	4	4	4	4	4	4	4	4	4	4	4	4	4	4	4	4	4	4	2	4	3	4	3	4	4
chr01_79130615	chr01	79130615	solcap_snp_c2_2364	1	3	1	4	3	2	3	3	2	2	3	4	2	4	3	4	4	4	1	4	4	2	3	4	2	4	2	4	4	1	1	3	1	4	3	3	4	2	3	4	4	4	4	2	3	4
chr01_79135160	chr01	79135160	candidate_SNP:79135159-79135160	4	4	4	4	4	3	4	4	4	4	4	3	4	4	4	4	4	4	4	4	4	4	4	4	4	3	3	4	4	4	4	4	4	4	4	4	4	4	4	4	4	4	4	4	4	4
chr01_79148838	chr01	79148838	solcap_snp_c2_2368	3	1	4	4	1	3	4	3	4	3	3	3	2	3	4	4	2	4	2	4	4	4	4	3	4	2	3	3	3	2	2	2	3	4	4	3	4	1	3	4	4	4	3	3	3	4
chr01_79208743	chr01	79208743	candidate_SNP:79208742-79208743	4	4	4	4	4	4	4	4	4	4	4	4	4	4	4	4	4	4	4	4	4	4	4	4	4	4	4	4	4	4	4	4	3	4	4	4	4	4	3	4	4	4	4	3	4	4
chr01_79219742	chr01	79219742	candidate_SNP:79219741-79219742	4	4	4	4	4	4	4	4	4	4	4	4	3	4	4	4	4	4	4	4	4	4	4	4	4	4	4	4	4	4	4	4	4	4	4	4	4	3	4	3	4	3	4	1	4	4
chr01_79226981	chr01	79226981	solcap_snp_c1_659	2	0	1	3	1	2	2	3	2	2	2	3	3	3	3	3	1	3	1	3	4	3	3	2	2	2	1	2	2	1	2	2	0	2	2	1	3	1	1	3	4	3	2	1	1	4
chr01_79255193	chr01	79255193	candidate_SNP:79255192-79255193	2	4	3	4	4	3	3	2	3	4	3	4	3	4	3	4	4	4	3	4	4	3	4	4	2	4	3	3	4	1	1	4	3	4	3	4	4	4	3	3	4	4	3	3	3	4
chr01_79285448	chr01	79285448	solcap_snp_c2_2384	3	4	3	4	4	3	3	3	3	4	3	4	3	4	3	4	4	4	3	4	4	3	4	4	2	4	3	3	4	2	2	4	3	4	3	4	4	4	3	3	4	4	3	3	2	4
chr01_79297552	chr01	79297552	candidate_SNP:79297551-79297552	4	4	4	4	4	4	4	4	4	4	4	4	4	4	4	4	4	4	4	4	4	4	4	4	4	4	4	4	4	4	4	4	3	4	4	4	4	4	4	4	4	4	4	3	4	4
chr01_79298554	chr01	79298554	ST4.03ch01_78676273	3	4	2	4	3	2	3	2	3	4	3	4	3	4	3	4	4	4	3	4	4	3	4	4	2	4	3	3	4	3	2	3	3	4	3	4	4	3	3	3	4	4	3	2	3	4
chr01_79316798	chr01	79316798	candidate_SNP:79316797-79316798	2	1	1	2	1	2	2	2	3	2	2	2	2	3	2	2	1	2	1	2	3	2	2	1	2	1	2	1	1	2	1	1	1	1	2	1	2	1	1	3	3	2	2	2	1	2
chr01_79347143	chr01	79347143	candidate_SNP:79347142-79347143	2	1	1	2	1	2	2	3	3	2	2	3	1	3	2	3	2	3	1	3	4	3	3	1	2	2	2	1	2	1	2	1	1	2	2	2	3	1	2	3	4	3	2	2	1	2
chr01_79350381	chr01	79350381	candidate_SNP:79350380-79350381	3	4	4	4	4	4	4	4	4	4	3	4	3	3	4	4	4	4	3	4	4	4	4	4	4	4	4	4	4	3	2	4	3	4	4	4	4	4	3	4	4	4	4	3	4	4
chr01_79351888	chr01	79351888	candidate_SNP:79351887-79351888	4	4	4	4	4	4	4	4	4	4	4	3	4	4	4	4	4	4	4	4	4	4	4	4	4	4	4	4	4	4	4	4	4	4	4	4	4	4	4	4	4	4	4	4	4	4
chr01_79365563	chr01	79365563	candidate_SNP:79365562-79365563	3	4	2	4	4	3	3	3	3	4	3	4	3	4	3	4	4	4	3	4	4	3	4	4	2	4	3	3	4	2	2	4	3	4	3	4	4	4	3	3	4	4	3	3	3	4
chr01_79366394	chr01	79366394	candidate_SNP:79366393-79366394	3	3	4	2	4	4	2	4	4	4	4	3	4	4	4	2	4	2	3	3	3	3	3	3	3	2	3	4	4	4	4	3	3	3	4	3	3	3	3	4	2	3	4	3	4	3
chr01_79367962	chr01	79367962	solcap_snp_c1_14853	2	1	1	3	1	2	3	2	3	2	2	3	2	3	2	3	1	3	1	3	4	3	3	1	2	1	2	1	1	1	1	2	1	2	2	2	3	1	2	3	4	3	2	2	1	3
chr01_79376789	chr01	79376789	candidate_SNP:79376788-79376789	3	4	4	4	4	4	4	4	4	4	3	4	3	3	4	4	4	4	2	4	4	4	4	4	4	4	4	4	4	3	3	4	3	4	4	4	4	4	3	4	4	4	4	3	4	4
chr01_79377422	chr01	79377422	solcap_snp_c2_50486	1	1	2	4	1	2	2	2	3	2	2	3	3	4	2	3	0	3	0	3	4	4	4	0	2	1	2	1	3	1	0	2	1	3	1	3	2	1	1	3	4	4	1	2	0	4
chr01_79377949	chr01	79377949	solcap_snp_c2_50483	3	1	1	2	2	2	3	3	2	2	3	4	3	4	2	3	1	3	3	2	4	3	3	1	2	3	1	1	1	2	2	3	2	2	2	2	3	2	2	3	4	3	2	3	1	2
chr01_79406277	chr01	79406277	ST4.03ch01_78785480	1	0	2	1	1	2	1	3	3	1	2	2	1	3	2	1	1	1	0	2	2	2	1	0	2	0	1	1	1	2	2	1	0	1	2	1	1	0	0	3	3	2	2	2	2	2
chr01_79425553	chr01	79425553	candidate_SNP:79425552-79425553	3	3	2	4	2	3	3	3	2	2	3	4	3	4	2	4	1	3	3	4	4	3	3	3	2	2	2	3	4	2	2	3	2	3	1	2	3	2	3	3	4	2	2	3	2	4
chr01_79430026	chr01	79430026	solcap_snp_c2_50502	1	0	1	1	1	2	2	1	2	3	3	2	3	3	2	3	1	1	0	NA	2	2	1	0	0	0	0	1	0	1	3	0	0	1	2	1	1	0	0	3	2	3	4	0	2	1
chr01_79431199	chr01	79431199	candidate_SNP:79431198-79431199	1	0	1	1	1	2	1	2	3	2	2	2	2	3	2	1	1	1	0	2	3	2	2	0	1	0	1	1	1	1	2	1	0	1	2	1	2	0	0	3	2	3	2	2	1	2
chr01_79519169	chr01	79519169	candidate_SNP:79519168-79519169	4	4	4	4	4	4	4	4	4	4	4	4	4	4	4	4	4	4	4	4	4	4	4	4	4	4	4	4	4	4	4	4	4	4	4	4	4	4	4	4	4	3	4	3	4	4
chr01_79521516	chr01	79521516	candidate_SNP:79521515-79521516	4	4	4	4	4	4	4	4	4	4	4	3	4	4	4	4	4	4	4	4	4	4	4	4	4	4	4	4	4	4	4	4	4	4	4	4	4	4	4	4	4	4	4	4	4	4
chr01_79537378	chr01	79537378	solcap_snp_c2_54547	1	0	1	1	1	2	1	2	3	2	2	2	2	3	2	1	1	1	0	2	2	2	1	0	1	0	1	1	1	1	1	0	2	1	2	1	2	0	2	3	2	2	2	2	1	2
chr01_79543534	chr01	79543534	solcap_snp_c1_15872	3	3	2	4	1	2	2	2	3	2	3	4	3	4	2	4	1	2	3	4	4	3	3	3	1	3	2	2	3	2	3	3	3	3	1	3	3	1	2	3	4	3	3	3	2	4
chr01_79545600	chr01	79545600	candidate_SNP:79545599-79545600	0	0	0	0	0	0	0	0	0	0	0	0	0	0	0	0	0	0	0	0	0	0	0	0	0	0	0	0	0	0	0	0	0	0	0	0	0	0	0	0	0	0	0	0	0	0
chr01_79578367	chr01	79578367	ST4.03ch01_78963708	4	4	4	4	4	4	4	4	4	4	4	3	4	4	4	4	4	4	4	4	4	4	4	4	4	4	4	4	4	4	4	4	4	4	4	4	4	4	4	4	4	4	4	4	4	4
chr01_79624267	chr01	79624267	solcap_snp_c2_7187	2	1	1	1	1	2	1	1	3	2	3	3	3	4	2	1	1	2	2	3	3	2	2	0	1	1	1	1	1	2	2	1	1	1	2	1	2	0	1	3	3	3	1	2	1	3
chr01_79629262	chr01	79629262	ST4.03ch01_79014546	3	4	3	3	3	2	3	2	1	2	2	2	2	1	1	3	3	3	4	2	1	2	2	4	3	4	2	3	3	3	3	3	4	3	2	3	2	4	4	1	2	2	1	3	3	3
chr01_79629328	chr01	79629328	ST4.03ch01_79014612	3	4	3	3	3	2	3	2	1	2	2	2	2	1	1	3	3	3	4	2	1	2	2	4	3	4	2	3	3	3	3	3	4	3	2	3	2	4	4	1	2	2	1	3	3	2
chr01_79635821	chr01	79635821	candidate_SNP:79635820-79635821	4	4	4	4	4	4	4	4	4	4	4	4	4	4	4	4	4	4	4	4	4	4	4	4	4	4	4	4	4	4	4	4	4	4	4	4	4	4	4	4	4	3	4	3	4	4
chr01_79643594	chr01	79643594	solcap_snp_c2_7233	1	0	1	1	1	2	1	2	3	1	2	2	2	3	2	1	1	1	0	2	3	2	2	0	1	0	1	1	1	1	1	2	1	1	2	1	2	0	1	3	2	3	2	2	1	2
chr01_79764118	chr01	79764118	solcap_snp_c1_2484	4	4	4	4	1	3	4	3	4	2	4	4	4	4	3	4	1	4	4	4	4	4	3	3	4	4	2	3	3	4	4	3	4	3	3	3	3	1	4	4	4	3	4	4	3	4
chr01_79793165	chr01	79793165	solcap_snp_c2_7094	1	1	0	2	0	0	2	0	0	0	0	0	0	0	0	2	0	2	1	1	1	1	1	1	1	2	1	0	0	0	0	1	0	1	0	1	1	1	1	0	2	1	0	1	0	1
chr01_79793583	chr01	79793583	candidate_SNP:79793582-79793583	4	4	4	4	4	4	4	4	4	4	4	4	3	3	4	4	4	4	3	4	4	4	4	4	4	4	4	4	4	3	3	4	4	4	4	4	4	4	4	4	4	4	4	4	4	4
chr01_79806393	chr01	79806393	candidate_SNP:79806392-79806393	3	2	1	3	4	3	3	3	3	4	3	2	3	4	3	3	4	3	3	3	4	3	4	3	4	3	3	2	3	2	2	3	2	3	3	3	4	4	3	3	4	4	3	3	2	3
chr01_79817589	chr01	79817589	ST4.03ch01_79211733	3	2	1	3	2	2	3	3	3	2	2	2	2	3	3	3	1	3	2	3	4	3	3	2	4	3	3	1	2	1	2	2	2	3	2	2	3	3	1	3	4	3	2	3	1	3
chr01_79821084	chr01	79821084	ST4.03ch01_79215228	4	2	4	4	1	3	4	3	4	2	4	3	4	4	4	4	1	4	4	4	4	4	3	3	4	3	3	3	3	4	4	4	4	2	3	2	3	2	4	4	4	3	3	4	3	4
chr01_79826365	chr01	79826365	ST4.03ch01_79220749	2	1	1	3	1	1	2	1	3	1	2	1	1	1	1	3	1	3	1	1	4	2	2	1	2	2	2	1	1	1	2	3	2	2	1	1	2	1	1	1	4	2	2	1	1	2
chr01_79826809	chr01	79826809	ST4.03ch01_79221193	2	1	1	3	1	2	3	2	3	2	2	1	3	3	2	3	1	3	1	3	4	3	3	2	4	2	2	1	3	1	1	2	1	2	1	2	3	1	1	3	4	3	2	2	1	3
chr01_79827385	chr01	79827385	ST4.03ch01_79221769	1	1	1	2	1	2	3	1	2	2	1	1	1	3	2	4	2	3	1	3	4	2	4	3	4	2	3	1	2	2	0	2	2	2	2	3	2	2	1	3	4	3	2	1	1	3
chr01_79827397	chr01	79827397	ST4.03ch01_79221781	4	4	4	4	4	3	3	4	4	3	4	4	3	2	3	4	4	4	4	1	4	3	2	3	2	4	4	4	2	4	4	4	4	4	3	4	3	4	4	1	4	4	4	3	4	3
chr01_79827490	chr01	79827490	ST4.03ch01_79221874	1	1	1	2	1	2	3	1	3	2	1	1	1	3	2	4	2	3	1	3	4	2	3	3	4	2	3	1	2	2	0	2	2	2	2	3	2	2	1	3	4	3	2	1	2	3
chr01_79843615	chr01	79843615	ST4.03ch01_79239971	4	4	4	4	2	3	4	3	4	2	4	3	4	4	3	4	2	4	4	4	4	4	3	3	4	4	3	3	2	3	3	3	4	3	3	3	3	1	4	4	4	3	3	4	3	4
chr01_79855996	chr01	79855996	candidate_SNP:79855995-79855996	4	4	4	4	1	2	4	1	4	2	4	2	4	4	3	4	2	4	4	4	4	4	2	2	4	4	3	3	4	3	2	2	3	4	3	3	3	1	4	4	4	4	2	4	3	4
chr01_79874471	chr01	79874471	PotVar0096812	4	4	4	4	1	4	4	3	4	3	4	3	4	4	4	4	3	4	4	4	4	4	3	3	4	4	4	3	NA	3	2	4	4	3	2	4	4		4	4	4	3	1	4	3	4
chr01_79883870	chr01	79883870	ST4.03ch01_79280395	3	4	4	4	4	3	3	3	4	2	4	3	2	3	3	4	4	4	4	2	4	3	4	3	2	4	4	4	3	3	3	4	4	4	3	4	3	4	4	2	4	4	4	2	4	3
chr01_79892269	chr01	79892269	ST4.03ch01_79288791	3	3	4	3	4	4	2	4	4	4	4	4	4	4	4	2	4	2	3	3	3	2	2	3	3	2	4	4	4	4	4	3	3	3	4	3	3	3	2	4	2	3	4	3	4	3
chr01_79894392	chr01	79894392	candidate_SNP:79894391-79894392	3	4	4	4	4	2	3	2	4	3	2	3	2	2	2	4	4	4	2	2	4	3	4	3	3	4	3	4	2	3	3	4	4	4	3	4	3	4	4	2	4	4	4	2	3	3
chr01_79913885	chr01	79913885	candidate_SNP:79913884-79913885	2	1	1	2	1	2	3	1	2	1	1	1	1	2	1	2	1	2	1	2	4	2	3	2	3	2	1	1	1	1	1	1	1	2	1	2	1	1	1	2	4	3	2	2	1	2
chr01_79916797	chr01	79916797	candidate_SNP:79916796-79916797	3	1	2	3	4	4	4	4	4	4	4	3	3	4	4	3	4	3	3	3	4	3	4	2	4	3	2	4	3	3	4	4	3	3	3	1	4	2	1	3	4	4	3	4	4	3
chr01_79919982	chr01	79919982	candidate_SNP:79919981-79919982	3	3	4	2	4	4	2	4	4	4	4	4	4	4	4	2	4	2	3	3	3	3	2	3	3	2	4	4	4	4	4	3	3	3	4	3	3	3	3	4	2	3	4	3	4	3
chr01_79934395	chr01	79934395	candidate_SNP:79934394-79934395	3	4	3	3	3	3	4	3	1	3	2	3	3	2	3	3	3	3	4	4	2	3	3	4	3	4	3	3	2	3	2	3	4	3	3	3	3	4	4	3	2	3	2	4	3	3
chr01_79943999	chr01	79943999	candidate_SNP:79943998-79943999	2	1	2	3	1	1	2	1	3	1	2	1	1	2	1	2	1	3	1	1	4	2	3	1	2	2	1	1	2	1	1	2	1	2	1	2	2	1	1	1	4	3	2	1	1	2
chr01_80006369	chr01	80006369	candidate_SNP:80006368-80006369	4	4	3	3	4	3	4	4	1	4	4	4	3	3	4	4	3	4	4	4	3	4	3	4	4	4	3	3	3	2	4	2	4	4	4	4	4	4	4	4	3	2	2	4	4	4
chr01_80006831	chr01	80006831	solcap_snp_c2_7193	4	4	4	3	4	4	2	4	4	4	4	4	4	4	4	3	4	3	4	3	4	3	4	4	3	3	4	4	4	4	4	4	3	3	4	3	3	4	4	4	1	2	4	3	4	4
chr01_80015708	chr01	80015708	PotVar0096798	3	3	2	3	2	2	1	2	3	2	3	3	2	3	3	3	2	3	3	2	4	3	2	2	2	2	2	1	2	2	3	2	2	3	3	3	2	2	2	2	4	2	2	2	2	2
chr01_80037523	chr01	80037523	candidate_SNP:80037522-80037523	3	3	4	2	4	4	2	4	4	4	4	4	4	4	4	2	4	2	3	3	3	3	2	3	3	2	4	4	4	4	4	2	3	3	4	3	3	3	3	4	2	3	4	3	4	3
chr01_80068194	chr01	80068194	ST4.03ch01_79453953	4	3	3	3	4	4	4	4	4	4	4	3	4	4	4	3	4	4	4	3	4	4	4	3	4	4	4	3	2	3	3	4	3	3	4	3	4	4	3	4	4	4	3	4	3	3
chr01_80068698	chr01	80068698	candidate_SNP:80068697-80068698	4	4	4	4	4	4	4	4	4	4	4	4	4	4	4	4	4	4	4	4	4	4	4	4	4	4	4	4	4	4	4	4	3	4	4	4	4	4	3	4	4	4	4	3	4	4
chr01_80080165	chr01	80080165	ST4.03ch01_79465924	3	1	2	2	1	2	4	2	4	1	3	3	3	3	3	3	2	4	2	4	4	4	2	1	4	3	1	4	4	3	3	1	3	2	3	1	3	1	1	4	4	4	1	2	1	4
chr01_80082836	chr01	80082836	ST4.03ch01_79468595	4	4	3	4	1	2	4	4	4	3	4	4	4	4	2	4	3	4	4	3	4	4	3	4	4	4	4	4	4	4	4	4	4	4	3	1	4	2	4	4	4	2	3	4	4	4
chr01_80084023	chr01	80084023	ST4.03ch01_79469782	4	3	3	3	4	2	3	1	4	3	2	4	3	3	3	3	4	4	4	2	4	3	4	2	2	4	4	4	2	4	4	4	3	3	3	3	3	4	3	2	4	4	4	2	2	3
chr01_80086416	chr01	80086416	PotVar0096724	4	4	4	4	4	4	4	4	4	4	4	3	4	4	4	4	4	4	4	4	4	4	4	4	4	4	4	4	4	4	4	4	4	4	4	4	4	4	4	4	4	4	4	4	4	4
chr01_80087191	chr01	80087191	PotVar0096717	4	4	4	4	4	4	4	4	4	4	4	3	4	4	4	4	4	4	4	4	4	4	4	4	4	4	4	4	4	3	4	4	4	4	4	4	4	4	4	4	4	4	4	4	4	4
chr01_80087365	chr01	80087365	PotVar0096708	3	4	4	4	4	4	4	4	4	4	3	4	3	3	4	4	4	4	3	4	4	4	4	4	4	4	4	4	4	4	3	4	4	4	4	4	4	4	4	4	4	4	4	4	4	4
chr01_80090400	chr01	80090400	PotVar0096648	2	2	2	1	1	2	1	1	3	1	2	2	2	2	1	1	1	2	1	0	3	2	1	0	1	1	2	2	1	2	3	2	1	1	2	1	1	0	1	3	2	2	2	0	1	1
chr01_80090841	chr01	80090841	PotVar0096625	3	2	4	3	4	4	2	4	3	4	4	4	4	4	4	2	4	1	3	2	3	3	1	3	3	1	4	3	4	4	4	2	2	3	4	3	2	3	3	4	3	3	4	2	4	1
chr01_80100436	chr01	80100436	ST4.03ch01_79486858	3	4	4	4	4	4	4	4	4	4	3	4	3	3	4	4	4	4	2	4	4	4	4	4	4	4	3	4	4	3	3	4	4	4	4	4	4	4	4	4	4	4	4	4	4	4
chr01_80100847	chr01	80100847	solcap_snp_c1_2519	4	3	3	3	4	3	3	2	4	3	3	4	3	3	3	3	4	4	4	3	4	3	4	3	3	4	4	4	3	4	4	4	3	3	3	3	3	4	3	3	4	4	4	3	3	3
chr01_80100963	chr01	80100963	solcap_snp_c1_2520	3	3	3	3	3	3	3	3	4	3	3	3	3	3	3	3	3	3	3	3	3	3	3	3	3	3	3	3	3	3	3	3	3	3	3	3	3	3	3	3	3	3	3	3	3	3
chr01_80110586	chr01	80110586	ST4.03ch01_79499766	3	3	4	3	4	4	3	4	4	4	4	4	4	4	4	3	4	3	3	3	3	3	2	4	3	3	4	4	4	4	4	3	1	3	4	3	2	3	3	4	3	3	4	3	4	3
chr01_80110594	chr01	80110594	ST4.03ch01_79499774	4	4	3	4	1	3	4	3	4	1	4	4	4	4	3	3	1	4	4	4	4	4	3	3	4	4	3	3	3	4	4	1	4	3	3	4	4	1	4	4	4	3	3	4	3	4
chr01_80112041	chr01	80112041	ST4.03ch01_79501221	0	1	1	1	0	2	1	2	0	1	1	0	1	1	1	1	0	0	0	2	0	1	0	2	2	0	0	0	3	0	0	0	2	1	1	1	1	0	1	2	0	0	0	2	2	1
chr01_80167183	chr01	80167183	candidate_SNP:80167182-80167183	3	4	4	2	4	4	1	4	4	4	4	3	4	4	4	2	4	4	3	3	3	3	1	3	3	4	4	4	4	4	4	3	3	3	4	3	4	4	3	4	3	3	4	3	4	4
chr01_80280576	chr01	80280576	solcap_snp_c2_7242	4	4	3	4	1	3	4	3	4	2	4	4	4	4	2	4	2	4	4	4	4	4	3	3	4	4	3	3	3	4	4	3	4	3	3	3	3	1	4	4	4	2	3	4	3	4
chr01_80295089	chr01	80295089	ST4.03ch01_79693827	3	4	4	4	4	4	4	4	4	4	3	4	3	3	4	4	4	4	2	4	4	4	4	4	4	4	4	4	4	3	3	4	4	4	4	4	4	4	4	4	4	4	4	4	4	4
chr01_80299180	chr01	80299180	candidate_SNP:80299179-80299180	4	4	4	4	4	4	4	4	4	4	4	4	4	4	4	4	4	4	4	4	4	4	4	4	4	4	4	4	4	4	4	4	3	4	4	4	4	4	3	4	4	4	4	3	4	4
chr01_80312524	chr01	80312524	solcap_snp_c1_2531	4	3	2	4	1	3	4	3	4	2	4	3	4	4	2	4	1	4	4	4	4	4	2	3	4	2	4	3	2	3	3	3	4	3	3	3	3	1	4	4	4	2	3	4	3	4
chr01_80315168	chr01	80315168	candidate_SNP:80315167-80315168	2	3	2	3	3	3	3	3	0	3	2	2	2	2	2	3	3	2	3	4	1	2	3	4	3	3	1	2	3	2	2	2	3	3	2	3	3	4	3	2	2	3	2	4	3	2
chr01_80315990	chr01	80315990	candidate_SNP:80315989-80315990	2	2	3	2	1	1	2	1	4	1	2	2	2	3	3	2	1	2	1	2	3	3	1	1	1	3	3	3	2	2	2	1	2	2	2	2	2	0	2	2	2	3	3	1	2	3
chr01_80318362	chr01	80318362	candidate_SNP:80318361-80318362	3	4	4	4	4	4	4	4	4	4	3	4	3	3	4	4	4	4	2	4	4	4	4	4	4	4	4	4	4	3	3	4	4	4	4	4	4	4	4	4	4	4	4	4	4	4
chr01_80340445	chr01	80340445	solcap_snp_c2_7264	4	4	3	4	1	2	4	3	4	2	4	4	4	4	3	4	1	4	4	4	4	4	3	3	4	4	3	3	3	4	4	3	4	3	3	3	3	1	4	4	4	3	3	4	3	4
chr01_80349844	chr01	80349844	solcap_snp_c2_7267	2	2	3	2	1	1	2	1	4	1	2	2	2	3	2	3	1	2	1	2	3	3	1	1	1	2	3	3	3	2	2	2	2	2	2	2	2	0	2	2	2	3	2	1	2	3
chr01_80371939	chr01	80371939	candidate_SNP:80371938-80371939	4	4	4	4	4	4	4	4	4	4	4	3	4	4	4	4	4	4	4	4	4	4	4	4	4	4	4	4	4	4	4	4	4	4	4	4	4	4	4	4	4	4	4	4	4	4
chr01_80383609	chr01	80383609	solcap_snp_c2_7269	2	2	2	3	3	3	3	3	0	3	3	2	3	2	2	3	3	2	3	4	2	2	2	4	3	3	1	2	2	3	3	1	3	3	2	2	3	4	3	2	3	1	2	4	3	3
chr01_80394233	chr01	80394233	solcap_snp_c2_7279	2	3	2	3	3	3	3	3	0	3	1	2	2	2	2	3	3	2	3	4	1	2	3	4	3	3	1	2	3	3	2	1	3	2	2	3	3	4	3	2	2	2	1	4	3	3
chr01_80414189	chr01	80414189	PotVar0049790	0	1	2	2	1	0	2	1	1	0	0	0	0	2	1	2	0	0	0	2	0	2	2	2	0	2	1	3	3	0	1	0	2	3	0	2	2	0	1	0	0	1	0	2	2	3
chr01_80415466	chr01	80415466	PotVar0049834	3	2	3	3	4	4	3	4	3	4	4	1	3	4	4	4	3	3	2	4	4	3	4	4	4	3	4	4	4	3	3	4	1	4	3	4	4	4	2	3	4	4	3	3	4	4
chr01_80417600	chr01	80417600	PotVar0049885	2	2	3	3	2	2	2	2	3	2	3	2	2	4	2	2	2	2	2	3	3	3	2	2	2	2	3	3	3	2	2	2	2	2	2	2	2	2	2	2	2	3	3	2	2	3
chr01_80417707	chr01	80417707	PotVar0049886	4	4	3	4	2	3	4	3	4	2	4	4	4	4	3	4	2	4	4	4	4	4	3	3	4	4	3	3	3	4	4	3	4	3	3	3	3	1	4	4	4	3	3	4	3	4
chr01_80429872	chr01	80429872	ST4.03ch01_79833697	1	1	2	2	2	1	1	1	3	1	2	1	1	3	2	1	2	1	0	1	3	2	1	1	1	1	2	2	3	1	1	1	1	2	1	2	2	0	1	1	2	3	2	1	2	2
chr01_80431556	chr01	80431556	solcap_snp_c1_2540	3	3	4	2	4	2	2	2	4	3	3	4	3	4	3	2	4	2	3	2	3	3	2	2	1	3	4	4	3	4	4	2	3	3	3	3	3	3	3	2	2	4	4	2	3	3
chr01_80437941	chr01	80437941	solcap_snp_c2_7290	3	3	4	3	4	2	2	2	3	3	3	4	3	4	3	2	4	2	3	3	3	3	2	3	2	3	4	4	3	4	4	3	4	3	3	3	3	3	3	2	2	4	4	2	3	2
chr01_80439172	chr01	80439172	candidate_SNP:80439171-80439172	3	3	4	2	4	3	2	3	4	3	3	4	3	4	3	2	4	2	3	2	3	3	2	3	1	2	4	4	3	4	4	3	2	3	3	3	3	3	2	2	2	4	4	1	3	3
chr01_80443197	chr01	80443197	candidate_SNP:80443196-80443197	2	3	3	4	4	4	2	4	3	4	4	3	3	4	4	4	4	3	3	4	4	4	4	4	4	4	4	4	4	2	2	3	4	4	3	4	4	4	3	3	4	4	4	4	4	4
chr01_80451191	chr01	80451191	candidate_SNP:80451190-80451191	4	2	4	3	3	4	4	4	3	4	4	3	4	4	4	4	4	3	4	3	4	4	4	4	4	2	3	4	4	4	4	3	3	4	4	3	4	4	4	4	4	4	4	4	4	4
chr01_80452790	chr01	80452790	candidate_SNP:80452789-80452790	3	4	4	4	4	4	3	4	4	4	3	4	3	3	4	4	4	4	2	4	4	4	4	4	4	4	4	4	4	3	3	4	4	4	4	4	4	4	4	4	4	4	4	4	4	4
chr01_80471962	chr01	80471962	candidate_SNP:80471961-80471962	4	4	2	2	3	2	4	4	0	3	3	3	3	2	2	3	1	1	4	4	2	1	4	4	2	4	1	3	3	3	2	1	4	3	3	3	2	4	4	1	0	2	3	4	3	3
chr01_80473054	chr01	80473054	solcap_snp_c2_7306	4	3	3	4	2	3	4	3	4	2	4	4	4	4	3	4	2	4	4	4	4	4	2	3	4	3	3	3	3	4	4	4	4	3	3	3	2	1	4	4	4	3	1	4	3	4
chr01_80489780	chr01	80489780	PotVar0049910	3	4	4	4	4	4	4	4	4	4	3	4	3	3	4	4	4	4	3	4	4	4	4	4	4	4	4	4	4	3	3	4	4	4	4	4	4	3	4	4	4	4	4	4	4	4
chr01_80489959	chr01	80489959	PotVar0049914	3	3	2	4	3	3	3	3	3	3	4	3	3	4	4	4	3	3	3	4	4	4	3	3	4	3	3	3	3	2	3	2	3	2	3	3	3	2	3	3	4	3	2	4	4	4
chr01_80492213	chr01	80492213	ST4.03ch01_79895825	3	3	4	2	4	3	2	2	4	3	3	4	3	4	3	3	4	3	3	1	3	3	3	1	2	2	4	4	3	4	4	3	3	3	3	3	3	3	3	2	2	4	4	2	3	3
chr01_80510327	chr01	80510327	solcap_snp_c2_7310	3	4	3	3	3	3	4	3	1	3	2	3	3	1	2	3	2	3	4	4	1	3	4	4	3	4	2	3	1	3	3	3	4	3	3	3	3	4	4	3	2	1	3	4	3	3
chr01_80519134	chr01	80519134	ST4.03ch01_79922839	2	2	4	2	4	4	2	4	4	4	3	4	3	4	3	2	4	3	3	3	3	3	3	3	1	3	4	4	3	4	4	3	3	3	3	3	3	3	3	3	2	4	4	2	3	3
chr01_80521596	chr01	80521596	candidate_SNP:80521595-80521596	4	4	4	4	4	3	4	3	4	3	4	4	4	4	4	4	4	4	4	4	4	4	4	4	4	4	4	4	4	4	4	4	4	4	4	4	4	4	4	4	4	4	4	4	4	4
chr01_80523995	chr01	80523995	candidate_SNP:80523994-80523995	0	1	1	1	0	0	1	0	0	0	0	0	0	1	0	1	0	0	0	2	0	1	0	1	0	1	0	1	1	0	0	0	1	2	0	2	1	0	2	0	0	1	0	1	1	2
chr01_80545620	chr01	80545620	candidate_SNP:80545619-80545620	3	4	3	3	2	3	4	3	1	2	2	3	3	3	2	3	1	3	4	4	1	3	4	4	3	4	1	2	3	3	3	2	4	3	2	3	3	4	4	3	2	3	2	4	3	3
chr01_80561079	chr01	80561079	solcap_snp_c2_7331	3	2	1	3	1	2	3	2	3	1	4	2	3	4	3	3	2	3	3	4	4	3	2	2	4	2	2	2	2	2	2	2	2	2	2	2	3	1	3	3	4	2	1	4	3	4
chr01_80563191	chr01	80563191	candidate_SNP:80563190-80563191	4	4	3	4	2	2	4	2	4	2	4	4	3	4	3	4	3	4	3	4	4	4	2	4	4	4	3	2	3	4	4	3	4	3	3	3	3	1	4	4	4	2	3	4	4	4
chr01_80571987	chr01	80571987	candidate_SNP:80571986-80571987	4	4	4	4	4	3	4	3	4	3	4	3	4	4	4	4	4	4	4	4	4	4	4	4	4	4	4	4	4	4	4	4	4	4	4	4	4	4	4	4	4	4	4	4	4	4
chr01_80576636	chr01	80576636	solcap_snp_c1_2562	2	1	1	3	1	1	3	1	2	1	2	1	2	2	2	3	2	3	1	3	4	3	2	1	2	1	2	2	1	1	1	2	1	2	1	2	3	1	2	2	4	2	1	2	2	4
chr01_80584000	chr01	80584000	candidate_SNP:80583999-80584000	4	3	4	3	4	4	4	4	4	3	4	4	4	4	4	4	4	4	4	4	3	4	4	4	4	3	4	4	4	4	4	4	4	3	4	4	4	4	4	4	4	4	4	4	4	4
chr01_80593584	chr01	80593584	candidate_SNP:80593583-80593584	1	0	1	1	1	1	1	1	3	1	2	1	2	3	2	1	3	1	0	2	2	2	0	0	1	0	2	1	1	1	1	1	0	1	1	1	2	0	1	2	2	2	2	2	2	2
chr01_80596795	chr01	80596795	candidate_SNP:80596794-80596795	3	4	4	4	4	4	4	4	4	4	2	4	3	3	3	4	4	4	2	3	4	4	4	4	2	4	4	4	4	3	3	4	4	4	3	4	4	4	4	3	4	4	4	3	3	4
chr01_80611457	chr01	80611457	candidate_SNP:80611456-80611457	0	0	0	0	0	0	0	0	0	0	0	0	0	1	0	0	0	0	0	2	0	1	0	0	0	0	0	0	0	0	0	0	0	0	0	0	1	0	1	0	0	1	0	1	1	1
chr01_80622388	chr01	80622388	candidate_SNP:80622387-80622388	4	3	4	4	4	4	4	4	4	4	4	4	4	4	4	4	4	4	4	4	4	4	4	4	4	4	4	4	4	4	4	4	4	4	4	4	4	4	4	4	4	4	4	4	4	4
chr01_80624772	chr01	80624772	candidate_SNP:80624771-80624772	4	4	4	4	4	4	4	4	4	4	4	4	4	4	4	4	4	4	4	4	4	4	4	4	4	4	4	4	4	4	4	4	3	4	4	4	4	4	3	4	4	4	4	3	4	4
chr01_80637595	chr01	80637595	candidate_SNP:80637594-80637595	4	3	4	4	3	4	4	4	4	4	2	2	4	3	3	3	4	4	3	3	3	4	4	4	3	4	4	4	4	4	4	4	3	4	4	4	3	4	2	3	4	4	4	4	4	4
chr01_80649833	chr01	80649833	ST4.03ch01_80054534	2	3	4	2	4	4	2	4	4	4	4	4	4	4	4	3	4	3	3	3	3	3	2	3	3	3	4	4	4	4	4	3	3	3	4	3	2	3	3	4	2	4	4	4	4	3
chr01_80667047	chr01	80667047	candidate_SNP:80667046-80667047	3	4	2	3	2	2	4	1	2	2	2	2	3	1	2	3	2	3	4	4	1	2	4	4	3	4	2	3	2	2	3	3	4	3	3	3	3	4	4	2	2	2	3	4	3	3
chr01_80672622	chr01	80672622	solcap_snp_c2_6990	3	4	3	3	3	3	4	3	1	3	2	3	2	2	2	3	2	3	4	4	1	3	4	4	3	4	2	3	3	3	3	3	4	3	3	3	3	4	4	2	2	3	3	3	2	3
chr01_80680798	chr01	80680798	candidate_SNP:80680797-80680798	3	3	3	3	3	3	3	3	3	3	4	3	3	4	3	3	3	3	3	3	4	3	4	4	3	4	4	3	4	3	3	3	3	3	3	4	3	3	3	4	3	3	4	3	4	3
chr01_80696802	chr01	80696802	solcap_snp_c2_6997	0	0	1	2	2	2	0	0	3	2	2	0	4	2	2	2	2	0	0	3	2	4	0	0	0	0	NA	2	2	0	1	2	0	0	1	1	2	0	0	4	2	2	1	4	1	2
chr01_80705599	chr01	80705599	candidate_SNP:80705598-80705599	1	0	0	1	1	0	1	1	3	0	1	1	0	4	3	1	1	0	0	2	2	2	0	1	2	0	3	2	NA	0	2	1	0	1	1	1	1	0	4	2	1	2	1	2	2	1
chr01_80716306	chr01	80716306	solcap_snp_c1_2458	3	3	3	2	1	1	2	2	4	2	4	4	4	4	3	2	2	2	2	3	3	3	0	2	2	2	3	2	3	4	4	2	3	2	4	2	2	0	2	4	1	3	3	4	3	2
chr01_80718712	chr01	80718712	ST4.03ch01_80123665	0	0	0	0	0	0	1	0	0	1	1	0	0	1	0	0	0	0	0	1	0	2	0	0	1	0	0	0	0	0	0	0	0	0	1	1	2	0	2	0	0	2	0	2	1	2
chr01_80748840	chr01	80748840	solcap_snp_c2_7012	3	3	3	2	1	3	2	2	4	2	4	4	4	4	3	2	3	2	3	3	3	3	0	3	3	2	3	2	3	4	4	2	3	3	3	2	2	0	3	4	2	2	3	4	3	2
chr01_80748885	chr01	80748885	PotVar0049951	3	2	2	3	4	4	3	4	3	4	4	2	3	4	4	3	4	3	2	4	4	3	4	2	4	3	3	3	2	2	3	3	2	3	3	3	4	4	3	2	4	4	4	4	4	4
chr01_80749400	chr01	80749400	PotVar0049976	3	4	4	4	4	4	4	4	4	4	3	4	3	3	3	4	4	4	3	3	4	4	4	4	2	4	4	4	4	3	3	4	4	4	3	4	4	4	4	4	4	4	4	3	3	4
chr01_80754580	chr01	80754580	solcap_snp_c1_2464	2	4	4	4	4	4	4	4	4	4	2	4	3	3	3	4	4	4	2	3	4	4	4	4	2	4	4	4	4	3	3	4	4	4	3	4	4	4	4	4	4	4	4	3	3	4
chr01_80756871	chr01	80756871	PotVar0050052	0	0	0	0	0	0	1	0	0	0	0	0	0	1	0	0	0	0	0	1	0	1	0	0	0	0	0	0	0	0	0	0	0	0	0	0	1	0	2	0	0	1	0	1	1	0
chr01_80757033	chr01	80757033	PotVar0050056	4	4	4	4	4	4	4	4	4	4	4	4	3	4	4	4	4	4	4	4	4	4	4	4	4	4	4	4	4	4	4	4	4	4	4	4	4	4	4	3	4	4	4	3	4	4
chr01_80758288	chr01	80758288	candidate_SNP:80758287-80758288	3	4	3	3	3	4	4	3	1	3	1	3	3	3	1	3	2	3	4	4	0	3	4	4	2	4	2	3	4	3	3	2	3	2	3	3	3	4	4	2	2	3	3	4	3	1
chr01_80771193	chr01	80771193	candidate_SNP:80771192-80771193	4	4	4	4	4	4	4	4	4	4	4	4	4	4	4	4	4	4	4	4	4	4	4	4	4	4	4	4	4	4	4	4	3	4	4	4	4	4	3	4	4	4	4	3	4	4
chr01_80775973	chr01	80775973	candidate_SNP:80775972-80775973	1	1	0	2	0	0	3	0	0	0	0	0	0	1	0	2	0	1	1	2	1	1	2	1	1	2	0	0	0	0	0	1	1	1	0	1	2	1	2	0	2	1	0	1	1	1
chr01_80784204	chr01	80784204	solcap_snp_c1_2468	3	1	2	3	1	1	2	1	3	1	1	1	2	3	2	4	3	3	1	2	4	3	2	2	2	1	2	2	1	1	2	3	2	2	2	2	3	1	2	3	4	3	1	2	3	3
chr01_80791970	chr01	80791970	candidate_SNP:80791969-80791970	4	4	4	4	4	3	4	2	4	3	4	3	4	4	4	4	4	4	4	4	4	4	4	4	4	4	4	4	4	4	4	4	4	4	4	4	4	4	4	4	4	4	4	4	4	4
chr01_80795595	chr01	80795595	solcap_snp_c2_7048	4	4	3	4	1	2	4	2	4	2	4	4	4	4	3	4	2	4	4	3	4	4	2	3	4	4	3	2	3	4	4	3	3	3	3	3	3	1	3	4	4	2	1	3	3	2
chr01_80819466	chr01	80819466	solcap_snp_c2_7053	4	4	1	1	1	1	4	1	1	2	1	2	2	4	1	2	0	3	4	3	0	2	2	1	3	4	2	3	2	3	4	2	4	3	1	2	1	0	4	1	1	1	0	3	2	3
chr01_80821256	chr01	80821256	solcap_snp_c2_7059	1	1	2	3	2	3	3	3	3	2	2	1	2	3	3	3	4	2	1	3	4	2	3	2	3	1	3	3	3	1	1	3	1	3	2	3	4	4	3	3	4	4	3	3	3	4
chr01_80821575	chr01	80821575	solcap_snp_c2_7061	3	4	1	3	3	1	4	0	1	2	1	3	2	3	1	3	0	2	4	2	2	3	3	4	3	4	0	1	4	4	2	2	4	2	2	3	3	0	4	2	3	0	1	2	2	2
chr01_80828786	chr01	80828786	candidate_SNP:80828785-80828786	4	4	4	4	4	4	4	4	4	4	4	4	3	4	4	4	4	4	4	4	4	4	4	4	4	4	4	4	4	4	4	4	4	4	4	4	4	4	4	3	4	4	4	4	4	4
chr01_80829663	chr01	80829663	solcap_snp_c1_2475	2	1	0	2	0	0	3	0	0	0	0	0	1	1	0	2	0	2	1	2	1	2	1	1	1	1	0	0	0	0	0	1	1	1	0	1	2	1	2	1	2	1	0	1	1	2
chr01_80835197	chr01	80835197	candidate_SNP:80835196-80835197	4	4	4	4	4	4	4	4	4	4	1	4	3	2	3	4	4	4	2	2	3	4	4	4	2	4	4	4	4	2	3	4	4	4	4	4	4	4	4	4	4	4	4	4	3	4
chr01_80841365	chr01	80841365	ST4.03ch01_80250864	3	2	2	3	4	4	3	4	3	4	4	2	3	4	4	3	4	3	3	4	4	3	4	2	4	1	3	3	3	2	1	3	2	3	3	3	4	4	3	3	4	4	3	3	4	4
chr01_80843999	chr01	80843999	candidate_SNP:80843998-80843999	4	4	4	4	4	4	4	4	4	4	4	4	4	4	4	4	4	4	4	4	4	4	4	4	4	3	4	4	4	4	4	4	4	4	4	4	4	4	4	4	4	4	4	4	4	4
chr01_80845600	chr01	80845600	candidate_SNP:80845599-80845600	1	2	0	2	0	0	3	0	0	0	0	0	1	1	0	2	0	2	2	2	1	2	1	2	2	2	0	0	0	0	0	1	2	1	0	1	2	1	2	2	2	1	0	2	1	2
chr01_80852583	chr01	80852583	solcap_snp_c2_7068	2	1	2	3	2	3	4	3	3	2	1	1	1	2	3	3	4	3	1	3	4	3	3	2	2	2	2	3	2	2	1	3	1	3	2	2	4	4	3	2	4	4	4	1	1	4
chr01_80931986	chr01	80931986	candidate_SNP:80931985-80931986	4	4	4	4	3	4	4	3	4	3	4	3	4	4	4	4	4	4	4	4	4	4	4	4	4	4	4	4	4	4	4	4	4	4	4	4	4	4	4	4	4	4	4	4	3	4
chr01_80942382	chr01	80942382	candidate_SNP:80942381-80942382	4	4	4	3	2	3	4	3	3	3	2	1	4	2	2	3	2	3	4	4	2	3	4	4	2	4	2	3	2	1	4	4	4	3	2	3	3	4	4	2	3	4	3	4	4	3
chr01_80942884	chr01	80942884	candidate_SNP:80942883-80942884	4	4	3	4	3	2	3	2	4	3	4	4	4	3	3	4	2	4	4	2	4	3	3	3	4	4	3	2	3	4	4	3	4	3	3	3	2	1	4	4	4	2	2	4	4	2
chr01_80951180	chr01	80951180	candidate_SNP:80951179-80951180	1	1	1	3	1	2	4	2	0	1	0	0	1	1	1	2	2	2	1	3	1	2	3	2	2	2	1	2	2	0	0	2	1	2	1	2	3	4	2	2	2	3	2	1	1	3
chr01_80967999	chr01	80967999	candidate_SNP:80967998-80967999	4	4	4	4	4	4	4	4	4	4	4	4	4	4	4	4	4	4	4	4	4	4	4	4	4	4	4	4	4	4	4	4	3	4	4	4	4	4	3	4	4	4	4	3	4	4
chr01_80971965	chr01	80971965	candidate_SNP:80971964-80971965	3	3	4	4	2	3	4	3	4	1	2	2	3	3	3	4	4	4	2	3	4	4	3	4	1	2	4	4	4	2	2	4	2	4	3	4	4	4	3	4	4	4	4	1	2	4
chr01_80973834	chr01	80973834	ST4.03ch01_80383012	2	3	2	3	4	4	4	4	4	4	4	2	3	4	4	3	4	3	2	4	4	3	4	3	4	3	3	3	2	3	2	2	2	2	2	3	4	4	3	3	4	4	4	3	4	4
chr01_80976472	chr01	80976472	ST4.03ch01_80385650	3	4	3	3	3	3	4	3	1	3	2	3	3	2	2	3	2	3	4	4	1	3	4	4	3	4	2	3	3	3	3	3	4	3	3	3	3	4	4	2	2	3	3	4	3	3
chr01_80976572	chr01	80976572	ST4.03ch01_80385750	2	1	1	3	1	1	3	1	3	1	2	1	2	2	2	2	2	2	1	1	4	2	2	1	2	1	2	1	1	1	1	2	1	2	1	2	2	1	1	3	4	2	1	1	2	2
chr01_81003987	chr01	81003987	candidate_SNP:81003986-81003987	1	1	0	2	0	0	3	0	0	0	0	0	1	0	0	2	0	2	1	1	1	1	3	1	1	1	0	0	0	0	0	1	1	1	0	1	1	1	2	1	2	1	0	1	1	2
chr01_81017887	chr01	81017887	solcap_snp_c1_1853	4	4	3	4	2	2	3	1	4	3	4	4	4	3	3	4	2	4	4	3	4	3	3	3	4	4	2	2	3	4	4	3	4	3	2	3	2	2	4	4	4	3	2	4	4	2
chr01_81039669	chr01	81039669	ST4.03ch01_80450650	2	2	2	3	2	4	4	3	4	3	2	1	2	4	3	3	4	4	2	3	4	4	3	3	2	1	4	3	3	1	3	3	2	3	3	3	4	4	1	4	4	4	4	1	3	4
chr01_81055673	chr01	81055673	PotVar0050124	4	4	4	4	3	3	4	3	4	2	4	3	4	4	4	4	4	4	4	4	4	4	3	4	4	4	4	4	4	4	4	4	4	4	4	4	4	4	4	4	4	4	4	4	3	4
chr01_81070906	chr01	81070906	ST4.03ch01_80484052	4	4	4	4	4	4	4	4	4	3	4	4	4	4	4	4	4	4	4	4	4	4	4	4	4	4	4	4	4	4	4	4	4	4	4	4	4	4	3	4	4	4	4	3	4	4
chr01_81093889	chr01	81093889	candidate_SNP:81093888-81093889	2	1	3	2	2	3	4	3	4	2	2	2	2	3	3	2	3	2	2	2	2	3	2	3	2	1	2	3	1	1	1	2	2	3	2	2	4	3	4	2	2	3	2	1	2	3
chr01_81107930	chr01	81107930	candidate_SNP:81107929-81107930	4	2	3	4	3	4	4	4	3	3	3	3	4	3	3	4	4	4	3	4	4	4	4	4	4	2	4	4	4	3	2	4	3	4	3	4	4	4	4	3	4	4	2	1	3	4
chr01_81109199	chr01	81109199	solcap_snp_c1_1847	1	1	2	3	3	3	4	3	3	2	2	1	2	3	3	3	4	3	2	2	4	3	2	3	2	1	3	3	3	1	1	4	1	3	2	3	4	4	2	3	4	4	3	1	2	4
chr01_81118586	chr01	81118586	solcap_snp_c2_5102	3	2	1	3	3	3	4	4	3	1	2	1	3	3	4	4	4	4	2	2	4	3	3	3	2	2	4	4	3	1	1	2	1	3	2	4	4	4	4	4	4	3	1	1	2	4
chr01_81123394	chr01	81123394	ST4.03ch01_80538437	4	4	4	4	2	4	4	4	4	3	4	3	4	4	4	4	4	4	4	4	4	4	4	4	4	4	4	4	4	4	4	4	4	4	4	4	4	4	4	4	4	4	4	4	4	4
chr01_81125572	chr01	81125572	candidate_SNP:81125571-81125572	4	4	4	4	4	4	4	4	4	4	4	4	4	4	4	4	4	4	4	4	4	4	4	4	4	4	4	4	4	4	4	4	3	4	4	4	4	4	3	4	4	4	4	3	4	4
chr01_81127978	chr01	81127978	candidate_SNP:81127977-81127978	4	3	4	4	4	4	4	4	4	4	4	4	4	4	4	4	4	4	4	4	4	4	4	4	4	3	4	4	4	4	4	4	4	4	4	4	4	4	4	4	4	4	4	4	4	4
chr01_81135985	chr01	81135985	candidate_SNP:81135984-81135985	2	2	4	4	1	2	4	2	4	3	1	1	2	4	3	3	4	3	1	3	4	4	3	3	3	2	4	2	4	1	2	3	3	3	1	3	4	3	2	3	4	4	3	1	2	4
chr01_81137590	chr01	81137590	candidate_SNP:81137589-81137590	4	3	4	4	4	4	4	4	4	4	4	4	4	4	4	4	4	4	4	4	4	4	4	4	4	3	4	4	4	4	4	4	4	4	4	4	4	4	4	4	4	4	4	4	4	4
chr01_81145092	chr01	81145092	candidate_SNP:81145091-81145092	4	3	4	4	4	4	4	3	4	4	4	3	4	4	4	4	4	4	3	4	4	4	4	4	4	4	4	4	4	4	4	3	4	4	4	4	4	4	4	4	4	4	4	3	4	4
chr01_81146805	chr01	81146805	solcap_snp_c2_5091	4	3	3	3	4	3	2	4	4	2	4	4	4	4	2	3	3	2	4	3	3	1	1	2	4	2	3	3	4	4	4	3	3	3	3	1	1	2	4	4	1	0	2	3	4	4
chr01_81189380	chr01	81189380	PotVar0050277	3	4	4	4	4	4	4	3	4	4	3	4	1	3	3	4	4	4	2	3	4	4	4	4	2	4	4	4	4	2	3	4	4	4	3	4	4	4	4	4	4	4	4	3	3	4
chr01_81190515	chr01	81190515	PotVar0050306	0	1	1	2	2	1	2	1	0	3	0	0	1	0	1	2	2	3	0	1	1	2	4	3	0	1	2	1	3	0	0	2	1	2	1	2	3	2	2	1	2	3	2	1	2	0
chr01_81199946	chr01	81199946	candidate_SNP:81199945-81199946	0	4	2	3	3	2	2	3	1	3	1	1	1	0	1	3	2	3	0	2	1	3	4	4	1	4	1	2	3	1	0	3	4	3	1	2	3	3	4	2	2	3	2	3	2	1
chr01_81204697	chr01	81204697	ST4.03ch01_80620870	4	4	4	4	3	4	4	4	4	2	4	4	4	4	4	4	4	4	4	4	4	4	3	4	4	4	4	4	4	4	4	4	4	4	4	4	4	4	4	4	4	4	4	4	3	4
chr01_81212732	chr01	81212732	candidate_SNP:81212731-81212732	2	1	1	3	1	2	4	2	3	2	2	2	2	3	2	3	4	3	1	2	4	3	3	3	2	1	3	2	3	1	1	2	1	3	2	3	4	3	2	3	4	4	3	1	2	3
chr01_81218342	chr01	81218342	candidate_SNP:81218341-81218342	3	1	2	3	3	2	4	3	3	4	4	3	3	4	4	3	4	3	3	3	4	3	4	3	4	2	3	2	3	2	2	2	1	2	3	3	4	3	2	3	4	4	3	2	4	3
chr01_81220516	chr01	81220516	ST4.03ch01_80637085	3	1	2	3	2	3	4	3	3	4	4	2	3	4	4	3	4	3	3	3	4	3	4	3	4	1	3	2	3	2	2	2	1	3	3	3	4	3	2	3	4	4	3	2	4	3
chr01_81221942	chr01	81221942	solcap_snp_c2_5059	3	3	2	3	3	3	4	3	2	4	4	2	3	4	4	3	4	3	3	3	4	3	4	3	4	1	3	2	4	2	3	1	2	3	3	2	4	3	3	3	4	4	4	3	4	3
chr01_81239398	chr01	81239398	ST4.03ch01_80655173	4	2	2	3	3	3	4	3	3	4	4	2	4	4	4	3	4	3	3	3	4	3	4	3	4	2	3	2	3	2	2	1	1	3	3	3	4	3	3	3	4	4	4	3	4	2
chr01_81241534	chr01	81241534	candidate_SNP:81241533-81241534	3	4	4	4	4	3	4	2	4	4	3	4	3	3	3	4	4	4	2	4	4	4	4	4	2	4	4	4	4	3	2	4	4	4	3	4	4	4	4	4	4	4	4	3	3	4
chr01_81246249	chr01	81246249	candidate_SNP:81246248-81246249	2	4	4	4	4	3	4	3	4	4	2	4	3	3	3	4	4	4	2	3	4	4	4	4	2	4	4	4	4	3	3	4	4	4	3	4	4	4	4	4	4	4	4	3	3	4
chr01_81255969	chr01	81255969	candidate_SNP:81255968-81255969	4	3	4	4	4	4	4	4	4	4	4	4	4	4	4	4	4	4	4	4	4	4	4	4	4	3	4	4	4	4	4	4	4	4	4	4	4	4	4	4	4	4	4	4	4	4
chr01_81263109	chr01	81263109	candidate_SNP:81263108-81263109	4	0	3	1	1	3	2	3	3	2	4	3	3	4	4	2	4	1	3	2	3	3	1	1	4	0	4	2	2	2	2	1	1	2	3	2	3	4	1	2	2	4	2	3	3	3
chr01_81265420	chr01	81265420	PotVar0050375	3	0	2	1	1	3	3	3	3	3	4	2	3	4	4	2	4	2	3	2	3	2	1	2	4	0	3	3	3	2	2	1	0	3	3	2	3	3	1	3	2	4	3	2	3	3
chr01_81265995	chr01	81265995	PotVar0050414	3	4	4	4	4	3	4	3	4	4	2	4	3	3	3	4	4	4	2	3	4	4	4	4	2	4	4	4	4	3	3	4	4	4	3	4	4	4	4	4	4	4	4	3	3	4
chr01_81266088	chr01	81266088	PotVar0050415	0	0	0	0	0	0	0	0	0	0	0	0	0	0	0	0	0	0	0	0	0	0	0	0	0	0	0	0	0	0	0	0	0	0	0	0	0	0	1	0	0	1	0	1	1	0
chr01_81266459	chr01	81266459	PotVar0050432	3	1	2	3	1	3	4	3	3	2	4	2	3	4	4	3	4	3	3	3	4	3	3	3	4	1	3	2	3	2	2	2	1	3	3	3	4	3	2	3	4	4	3	2	3	3
chr01_81266935	chr01	81266935	PotVar0050459	2	4	2	3	3	2	2	2	1	2	2	1	3	1	1	3	0	3	2	3	1	2	3	3	2	4	1	1	2	3	3	3	4	2	2	2	1	1	4	2	2	1	1	4	3	1
chr01_81311161	chr01	81311161	PotVar0050524	2	3	3	2	3	2	2	3	3	3	3	3	3	3	3	2	2	2	3	2	2	3	3	3	2	3	2	3	3	3	3	2	3	3	3	2	2	3	3	2	2	3	2	4	2	2
chr01_81311367	chr01	81311367	PotVar0050545	3	4	4	4	4	3	4	3	4	4	2	4	3	3	3	4	4	4	2	3	4	4	4	4	2	4	4	4	4	3	3	4	4	4	3	4	4	4	4	4	4	4	4	3	3	4
chr01_81312303	chr01	81312303	PotVar0050584	2	2	1	3	3	2	4	1	3	4	2	2	2	3	3	3	4	3	1	3	4	3	4	3	2	2	3	2	3	2	2	2	2	2	2	3	4	3	3	3	4	4	3	2	3	3
chr01_81317006	chr01	81317006	solcap_snp_c2_5009	2	4	4	4	4	3	4	3	4	4	2	4	2	2	2	4	4	4	1	3	4	4	4	3	1	4	4	4	3	2	3	4	4	4	2	4	4	4	4	3	4	4	4	2	2	4
chr01_81322363	chr01	81322363	candidate_SNP:81322362-81322363	0	0	1	0	0	0	2	0	0	1	1	0	0	0	2	0	2	0	0	0	0	1	0	1	1	0	0	1	0	0	0	0	0	1	0	0	2	2	0	0	0	2	0	1	0	0
chr01_81323969	chr01	81323969	candidate_SNP:81323968-81323969	4	4	4	4	3	4	4	4	4	2	4	4	4	4	4	4	4	4	4	4	4	4	3	4	4	4	4	4	4	4	4	4	4	4	4	4	4	4	4	4	4	4	4	4	3	4
chr01_81329578	chr01	81329578	candidate_SNP:81329577-81329578	4	4	4	4	3	4	4	4	4	2	4	4	4	4	4	4	4	4	4	4	4	4	3	4	4	4	4	4	4	4	4	4	4	4	4	4	4	4	4	4	4	4	4	4	3	4
chr01_81425171	chr01	81425171	solcap_snp_c1_3221	3	1	2	2	3	2	4	1	3	4	4	3	2	3	3	3	4	3	1	2	4	2	4	3	1	1	3	2	3	3	1	2	2	3	2	4	4	1	2	3	4	4	3	3	3	3
chr01_81434567	chr01	81434567	candidate_SNP:81434566-81434567	4	4	4	4	3	4	4	4	4	3	4	4	4	4	4	4	4	4	4	4	4	4	3	4	4	4	4	4	4	4	4	4	4	4	4	4	4	4	4	4	4	4	4	4	3	4
chr01_81440792	chr01	81440792	solcap_snp_c1_3210	2	1	2	3	1	2	4	2	3	1	2	2	2	3	3	3	4	3	1	2	4	3	3	2	2	1	3	2	2	0	0	2	1	3	2	3	4	2	2	1	4	4	2	1	2	3
chr01_81471982	chr01	81471982	candidate_SNP:81471981-81471982	3	1	2	3	3	3	4	3	3	4	4	3	3	4	4	3	4	3	3	3	4	2	4	3	4	1	2	2	3	3	3	1	2	2	3	2	4	2	3	3	4	4	2	3	4	3
chr01_81479801	chr01	81479801	ST4.03ch01_80907231	4	4	4	4	4	4	4	4	4	3	4	4	4	4	4	3	4	4	4	4	4	4	4	3	4	4	4	4	4	4	4	4	4	4	4	4	4	4	4	3	4	4	4	4	4	4
chr01_81479922	chr01	81479922	ST4.03ch01_80907352	3	3	4	3	3	3	4	3	3	4	4	3	3	4	4	3	4	4	3	2	4	4	3	3	4	3	3	3	2	2	3	2	3	2	3	3	4	3	2	2	4	4	4	3	4	4
chr01_81496397	chr01	81496397	ST4.03ch01_80923249	4	4	3	4	4	4	3	4	4	3	4	1	3	4	3	4	3	4	4	4	4	3	4	3	4	4	4	3	3	1	2	4	4	3	4	4	2	2	4	1	4	2	4	4	3	4
chr01_81510367	chr01	81510367	candidate_SNP:81510366-81510367	0	1	0	2	0	1	1	1	0	0	0	0	0	0	0	2	1	2	0	1	2	1	2	2	0	0	1	0	2	0	0	1	1	1	2	2	1	0	2	0	2	1	1	1	1	0
chr01_81513754	chr01	81513754	solcap_snp_c1_3306	2	2	3	3	1	2	4	2	3	3	2	3	1	3	3	3	4	3	1	2	4	3	3	3	2	2	3	2	2	2	2	2	1	3	2	3	4	3	2	3	4	4	3	1	3	3
chr01_81513766	chr01	81513766	ST4.03ch01_80940616	4	4	3	4	4	4	4	4	4	2	4	2	4	4	3	4	3	4	4	4	4	4	4	4	4	4	4	3	4	1	2	4	4	3	4	4	4	2	4	1	4	2	4	4	3	4
chr01_81514142	chr01	81514142	PotVar0050685	2	1	1	3	1	2	3	2	3	2	2	1	1	3	2	3	3	3	1	2	4	2	3	2	2	1	3	1	3	0	0	2	1	2	2	3	2	1	2	0	4	2	2	1	1	2
chr01_81514202	chr01	81514202	PotVar0050687	2	2	2	3	1	2	3	2	3	2	2	3	1	3	3	3	4	3	1	2	4	2	3	2	2	2	3	2	3	2	2	2	1	3	2	3	2	2	2	2	4	4	3	1	2	2
chr01_81515550	chr01	81515550	PotVar0050787	2	1	3	3	1	2	4	2	3	2	1	3	2	3	3	3	4	2	2	2	4	3	3	3	1	2	3	2	2	3	2	3	2	3	3	3	4	3	3	3	4	4	3	1	2	3
chr01_81520734	chr01	81520734	candidate_SNP:81520733-81520734	4	3	4	4	2	4	4	4	4	2	4	4	4	4	4	4	4	4	4	4	4	4	2	4	4	3	4	4	4	4	4	4	3	4	4	4	4	4	3	4	4	4	4	3	3	4
chr01_81543972	chr01	81543972	candidate_SNP:81543971-81543972	3	3	4	4	4	3	4	2	4	4	1	4	3	3	3	4	4	4	2	4	4	4	4	4	3	4	4	4	4	4	3	4	4	4	3	4	4	4	4	4	4	4	4	3	4	4
chr01_81581043	chr01	81581043	candidate_SNP:81581042-81581043	4	4	4	4	4	3	4	3	4	4	2	4	3	3	3	4	4	4	3	3	4	4	4	4	2	4	4	4	4	3	2	4	4	4	3	4	4	4	4	4	4	4	4	3	4	4
chr01_81582715	chr01	81582715	PotVar0050814	3	2	2	3	2	3	4	3	3	2	3	3	3	3	3	3	4	3	2	2	4	3	3	3	2	2	3	2	3	2	2	2	2	3	2	3	4	3	3	3	4	4	3	1	3	3
chr01_81584779	chr01	81584779	PotVar0050864	1	2	1	2	0	2	2	2	0	1	2	2	3	1	2	2	2	2	2	2	1	2	3	3	2	2	1	1	2	3	3	1	2	2	2	2	3	2	3	3	2	3	2	3	2	0
chr01_81588797	chr01	81588797	candidate_SNP:81588796-81588797	3	4	4	4	4	3	4	3	4	4	2	4	3	3	2	4	4	4	1	4	4	4	4	4	2	4	4	4	4	3	3	4	4	4	3	4	4	4	4	4	4	4	4	3	4	4
chr01_81611985	chr01	81611985	candidate_SNP:81611984-81611985	4	3	4	4	4	4	4	4	4	4	4	4	4	4	4	4	4	4	4	4	4	4	4	4	4	3	4	4	4	4	4	4	4	4	4	4	4	4	4	4	4	4	4	4	4	4
chr01_81669017	chr01	81669017	ST4.03ch01_81107034	1	2	2	0	2	2	1	1	1	3	2	2	2	1	3	0	1	0	3	1	0	2	1	1	2	2	0	3	0	4	4	1	2	1	1	0	2	3	2	4	0	3	1	4	2	0
chr01_81752781	chr01	81752781	candidate_SNP:81752780-81752781	4	4	4	4	4	4	4	4	4	4	4	4	4	4	4	4	4	4	4	4	4	4	4	4	4	4	4	4	4	4	4	4	3	4	4	4	4	4	3	4	4	4	4	3	4	4
chr01_81783993	chr01	81783993	candidate_SNP:81783992-81783993	3	2	2	3	3	3	4	3	3	4	4	3	3	4	4	3	4	3	3	3	4	3	4	3	4	2	3	2	2	3	3	3	2	3	3	3	4	3	3	3	4	4	3	3	4	3
chr01_81787984	chr01	81787984	candidate_SNP:81787983-81787984	4	4	4	4	4	4	4	4	4	4	4	4	4	4	4	4	4	4	4	4	4	4	4	4	4	4	4	4	4	4	4	4	3	4	4	4	4	4	4	4	4	4	4	3	4	4
chr01_81802370	chr01	81802370	candidate_SNP:81802369-81802370	4	4	4	4	4	4	4	4	4	4	4	4	4	4	4	4	4	4	4	4	4	4	4	4	4	4	4	4	4	4	4	4	2	4	4	4	4	4	3	4	4	4	4	3	4	4
chr01_81806392	chr01	81806392	candidate_SNP:81806391-81806392	4	0	2	3	4	3	4	2	3	4	4	2	3	4	4	3	4	3	3	3	4	2	4	3	4	1	3	2	3	3	3	3	1	2	3	3	4	3	2	3	4	4	3	3	4	3
chr01_81819196	chr01	81819196	ST4.03ch01_81256791	4	3	4	4	3	4	4	4	4	2	4	4	4	4	4	4	4	4	4	4	4	4	3	4	4	2	4	4	4	4	4	4	4	4	4	4	4	4	4	4	4	4	4	4	3	4
chr01_81820793	chr01	81820793	candidate_SNP:81820792-81820793	4	3	4	2	4	3	3	3	4	2	4	4	4	4	3	2	2	2	4	3	3	3	1	2	4	2	3	4	1	4	4	3	3	3	3	2	3	2	3	4	2	3	2	4	3	4
chr01_81828760	chr01	81828760	candidate_SNP:81828759-81828760	3	4	4	4	4	3	4	3	4	4	2	4	3	3	3	4	4	4	2	3	4	4	4	4	2	4	4	4	4	3	3	4	4	4	3	4	4	4	4	4	4	4	4	3	4	4
chr01_81832799	chr01	81832799	candidate_SNP:81832798-81832799	0	0	1	0	0	0	1	0	0	0	0	1	1	0	0	0	0	0	0	0	0	1	0	0	0	0	0	1	0	1	1	0	0	1	0	0	2	0	1	3	0	2	0	1	0	0
chr01_81835999	chr01	81835999	ST4.03ch01_81273596	4	4	4	4	2	4	4	4	4	2	4	4	4	4	4	4	4	4	4	4	4	4	3	4	4	4	4	4	4	4	4	4	4	4	4	4	4	4	4	4	4	4	4	4	3	4
chr01_81836059	chr01	81836059	ST4.03ch01_81273656	1	1	1	2	0	2	2	2	0	1	1	1	2	2	2	2	2	2	2	2	1	2	2	3	2	1	1	1	2	2	2	1	2	2	2	2	3	2	2	2	2	3	2	2	2	0
chr01_81840663	chr01	81840663	solcap_snp_c2_9970	1	2	1	2	1	2	2	2	0	3	2	2	2	1	2	2	2	2	2	2	1	3	4	3	2	1	1	1	1	2	2	1	1	2	2	2	3	2	2	2	2	3	2	2	3	0
chr01_81857484	chr01	81857484	solcap_snp_c2_9957	3	4	4	4	4	3	4	3	4	4	2	4	3	2	4	4	4	4	2	3	4	4	4	4	2	4	4	4	4	3	3	4	4	4	3	4	4	4	4	4	4	4	4	3	4	4
chr01_81862908	chr01	81862908	ST4.03ch01_81299673	3	4	4	4	4	3	4	3	4	4	2	4	3	3	3	4	4	4	3	3	4	4	4	4	2	4	4	4	4	3	3	4	4	4	3	4	4	4	4	4	4	4	4	3	4	4
chr01_81904762	chr01	81904762	solcap_snp_c2_9944	4	4	4	4	2	4	4	4	4	2	4	4	4	4	4	4	4	4	4	4	4	4	3	4	4	4	4	4	4	4	4	4	4	4	4	4	4	4	4	4	4	4	4	4	3	4
chr01_81911134	chr01	81911134	solcap_snp_c2_9930	2	3	3	1	3	1	1	2	1	1	2	2	3	1	1	1	0	1	3	2	0	2	1	1	2	3	1	3	0	3	3	2	3	2	1	1	1	2	3	4	0	1	1	3	1	2
chr01_81948775	chr01	81948775	candidate_SNP:81948774-81948775	4	4	4	4	4	4	4	4	4	4	4	4	4	4	4	4	4	4	4	4	4	4	4	4	4	4	4	4	4	4	4	4	3	4	4	4	4	4	3	4	4	4	4	3	4	4
chr01_81949804	chr01	81949804	solcap_snp_c2_9922	3	2	2	3	3	3	4	2	3	4	4	3	3	4	4	3	4	3	3	3	4	2	4	3	4	2	3	2	3	3	3	2	2	3	3	3	4	3	2	3	4	4	3	3	4	3
chr01_81957896	chr01	81957896	ST4.03ch01_81451539	4	3	4	4	4	4	4	4	4	4	4	4	4	4	4	4	4	4	4	4	4	4	4	4	4	3	4	4	4	4	4	4	4	4	4	4	4	4	4	4	4	4	4	4	4	4
chr01_81958717	chr01	81958717	solcap_snp_c2_9921	2	2	2	3	1	2	4	2	3	2	1	3	2	3	3	3	4	3	1	2	4	3	3	3	2	1	3	1	3	2	2	2	1	3	2	3	4	2	2	2	4	4	3	1	2	3
chr01_81964619	chr01	81964619	solcap_snp_c2_9917	4	4	4	4	3	4	4	4	3	2	3	4	4	4	3	4	4	4	4	3	4	4	3	4	2	4	4	4	4	4	4	4	4	4	3	4	4	4	4	4	4	4	4	4	2	4
chr01_81970743	chr01	81970743	solcap_snp_c2_9908	4	3	4	3	4	3	3	3	4	3	4	4	4	4	3	2	3	3	4	3	3	3	2	3	4	3	3	4	3	4	4	2	3	3	3	2	3	3	3	4	3	3	2	4	3	4
chr01_81972146	chr01	81972146	candidate_SNP:81972145-81972146	0	0	1	0	0	0	1	0	0	0	0	0	1	0	0	0	0	0	0	0	0	1	0	0	0	0	0	0	0	0	0	0	0	0	0	0	1	0	1	1	0	1	0	1	0	0
chr01_81975182	chr01	81975182	candidate_SNP:81975181-81975182	3	2	1	3	3	3	4	3	3	4	4	3	3	4	4	3	4	3	3	3	4	2	4	3	4	1	2	1	3	3	2	2	2	4	3	3	4	3	3	1	4	4	3	3	4	3
chr01_81976410	chr01	81976410	ST4.03ch01_81470046	3	3	3	3	3	3	3	3	3	3	3	3	3	3	3	3	3	3	3	3	3	3	3	3	3	3	3	3	3	3	3	3	3	3	3	3	3	3	3	3	3	3	3	3	3	3
chr01_81976524	chr01	81976524	ST4.03ch01_81470160	4	3	4	2	4	3	3	3	4	3	4	3	4	4	3	2	3	2	4	3	3	3	2	3	4	3	3	4	3	3	3	3	3	3	3	3	3	3	3	4	3	3	3	4	3	4
chr01_82002364	chr01	82002364	candidate_SNP:82002363-82002364	1	4	2	2	3	3	2	3	0	3	2	2	3	1	2	2	1	3	2	3	1	3	4	4	2	4	2	0	3	3	3	2	4	2	3	3	3	2	4	2	2	3	3	4	3	0
chr01_82040796	chr01	82040796	candidate_SNP:82040795-82040796	2	2	2	2	3	1	0	1	1	0	0	1	2	0	0	1	0	1	3	1	0	1	0	1	0	2	1	3	1	1	2	2	1	1	2	2	0	1	1	1	0	0	1	1	0	1
chr01_82073696	chr01	82073696	solcap_snp_c2_9892	4	4	3	4	4	4	3	4	4	4	4	3	4	4	4	4	3	4	4	2	4	4	4	4	4	4	4	3	4	3	3	4	4	3	4	4	3	4	4	2	4	3	4	4	4	4
chr01_82084664	chr01	82084664	solcap_snp_c2_9878	3	3	4	2	4	2	4	2	4	4	2	4	3	3	4	2	4	2	1	4	3	3	1	1	4	3	3	4	3	3	3	4	2	3	3	1	4	4	3	4	2	4	2	4	3	4
chr01_82090974	chr01	82090974	candidate_SNP:82090973-82090974	4	4	3	4	4	4	3	4	4	4	4	3	4	4	4	4	3	4	4	2	4	4	4	4	4	4	4	3	4	3	3	4	4	3	4	4	3	4	4	2	4	3	4	4	3	4
chr01_82100630	chr01	82100630	solcap_snp_c1_3281	2	3	4	1	3	2	2	2	1	2	2	2	3	1	1	1	1	1	2	2	0	2	1	1	2	3	1	3	1	3	2	2	3	1	1	1	3	1	1	4	0	2	1	4	3	1
chr01_82124686	chr01	82124686	PotVar0061273	4	3	4	2	4	3	4	3	4	4	4	4	4	4	4	2	4	2	4	4	3	3	0	3	4	3	4	4	4	4	4	3	3	3	3	3	4	4	3	4	2	4	2	4	3	4
chr01_82125024	chr01	82125024	PotVar0061254	3	4	4	4	4	3	4	3	4	4	3	4	3	3	4	4	4	4	1	4	4	4	4	4	4	4	4	4	4	3	3	4	4	4	4	4	4	4	4	4	4	4	4	4	4	4
chr01_82135435	chr01	82135435	PotVar0061179	4	4	4	4	4	4	4	4	4	4	4	4	4	4	4	4	4	4	4	4	4	4	4	3	4	4	4	4	3	4	4	4	4	4	4	4	4	4	4	4	4	4	4	4	4	4
chr01_82139783	chr01	82139783	PotVar0061106	2	1	2	3	2	2	4	2	3	3	2	2	2	3	4	3	4	3	1	2	4	3	3	2	3	1	2	2	2	2	2	2	2	3	2	1	4	3	3	3	4	4	3	3	3	3
chr01_82183160	chr01	82183160	candidate_SNP:82183159-82183160	4	4	4	4	4	4	4	4	4	4	4	4	4	4	4	4	4	4	4	4	4	3	4	4	4	4	4	4	4	4	4	4	3	4	4	4	4	4	3	4	4	4	4	3	4	4
chr01_82184628	chr01	82184628	solcap_snp_c1_3278	1	2	3	4	1	3	4	2	2	2	2	1	3	3	2	2	4	1	0	3	4	4	3	1	4	2	0	3	1	1	1	1	0	2	4	3	4	3	1	3	4	4	3	3	2	2
chr01_82211849	chr01	82211849	solcap_snp_c2_9843	4	4	4	4	2	4	4	4	4	2	3	4	4	4	4	4	4	4	4	4	4	4	3	3	3	4	3	4	3	4	4	4	4	3	3	3	4	4	4	4	4	4	3	3	3	4
[truncated: 16,483 more rows]
[truncated: 404 more columns]

## Sheet: Supplementary Table S3
Supplementary Table S3. Population genetics estimates for SNP markers using the package snpReady. SNP identification (snp_ID), allele frequencies (p and q), minor allele frequency (MAF), expected heterozygosity (He), Nei's distance (GD), and polymorphic information content (PIC).
Order	snp_ID	p	q	MAF	He	Ho	GD	PIC
1	chr01_432462	0.87	0.13	0.13	0.23	0.26	0.23	0.2
2	chr01_449027	0.5	0.5	0.5	0.5	0.7	0.5	0.37
3	chr01_485600	0.97	0.03	0.03	0.06	0.06	0.06	0.06
4	chr01_508800	0.6	0.4	0.4	0.48	0.76	0.48	0.37
5	chr01_510745	0.63	0.37	0.37	0.47	0.65	0.47	0.36
6	chr01_518398	0.38	0.62	0.38	0.47	0.76	0.47	0.36
7	chr01_527068	0.59	0.41	0.41	0.48	0.81	0.48	0.37
8	chr01_535192	0.93	0.07	0.07	0.13	0.14	0.13	0.12
9	chr01_543731	0.69	0.31	0.31	0.43	0.62	0.43	0.34
10	chr01_549584	0.98	0.02	0.02	0.03	0.04	0.03	0.03
11	chr01_557591	0.08	0.92	0.08	0.15	0.16	0.15	0.13
12	chr01_559038	0.56	0.44	0.44	0.49	0.88	0.49	0.37
13	chr01_566972	0.56	0.44	0.44	0.49	0.88	0.49	0.37
14	chr01_583727	0.24	0.76	0.24	0.37	0.48	0.37	0.3
15	chr01_592751	0.91	0.09	0.09	0.16	0.17	0.16	0.15
16	chr01_602954	0.6	0.4	0.4	0.48	0.74	0.48	0.37
17	chr01_603270	0.62	0.38	0.38	0.47	0.69	0.47	0.36
18	chr01_641866	0.77	0.23	0.23	0.36	0.47	0.36	0.29
19	chr01_663157	0.58	0.42	0.42	0.49	0.81	0.49	0.37
20	chr01_681775	0.79	0.21	0.21	0.33	0.41	0.33	0.27
21	chr01_717629	0.57	0.43	0.43	0.49	0.8	0.49	0.37
22	chr01_718236	0.94	0.06	0.06	0.11	0.12	0.11	0.1
23	chr01_719233	0.94	0.06	0.06	0.12	0.12	0.12	0.11
24	chr01_723752	0.6	0.4	0.4	0.48	0.77	0.48	0.37
25	chr01_732790	0.27	0.73	0.27	0.4	0.54	0.4	0.32
26	chr01_743630	0.62	0.38	0.38	0.47	0.76	0.47	0.36
27	chr01_746386	0.54	0.46	0.46	0.5	0.84	0.5	0.37
28	chr01_747188	0.92	0.08	0.08	0.16	0.17	0.16	0.14
29	chr01_763010	0.5	0.5	0.5	0.5	0.99	0.5	0.37
30	chr01_795199	0.23	0.77	0.23	0.35	0.46	0.35	0.29
31	chr01_808487	0.5	0.5	0.5	0.5	1	0.5	0.38
32	chr01_809732	0.3	0.7	0.3	0.42	0.58	0.42	0.33
33	chr01_823995	0.53	0.47	0.47	0.5	0.89	0.5	0.37
34	chr01_824850	0.58	0.42	0.42	0.49	0.8	0.49	0.37
35	chr01_834292	0.98	0.02	0.02	0.03	0.03	0.03	0.03
36	chr01_835137	0.29	0.71	0.29	0.41	0.58	0.41	0.33
37	chr01_836956	0.28	0.72	0.28	0.4	0.56	0.4	0.32
38	chr01_839144	0.92	0.08	0.08	0.15	0.16	0.15	0.14
39	chr01_851175	0.43	0.57	0.43	0.49	0.7	0.49	0.37
40	chr01_898058	0.24	0.76	0.24	0.36	0.47	0.36	0.3
41	chr01_935978	0.24	0.76	0.24	0.36	0.47	0.36	0.3
42	chr01_986977	0.92	0.08	0.08	0.14	0.16	0.14	0.13
43	chr01_986987	0.77	0.23	0.23	0.36	0.46	0.36	0.29
44	chr01_992483	0.51	0.49	0.49	0.5	0.91	0.5	0.37
45	chr01_1122653	0.61	0.39	0.39	0.48	0.78	0.48	0.36
46	chr01_1133401	0.55	0.45	0.45	0.49	0.9	0.49	0.37
47	chr01_1146213	0.5	0.5	0.5	0.5	0.74	0.5	0.37
48	chr01_1156799	0.62	0.38	0.38	0.47	0.67	0.47	0.36
49	chr01_1171602	0.68	0.32	0.32	0.44	0.64	0.44	0.34
50	chr01_1173327	0.63	0.37	0.37	0.47	0.72	0.47	0.36
51	chr01_1173926	0.56	0.44	0.44	0.49	0.88	0.49	0.37
52	chr01_1177430	0.6	0.4	0.4	0.48	0.77	0.48	0.37
53	chr01_1181722	0.27	0.73	0.27	0.4	0.54	0.4	0.32
54	chr01_1183943	0.2	0.8	0.2	0.32	0.4	0.32	0.27
55	chr01_1191971	0.59	0.41	0.41	0.48	0.74	0.48	0.37
56	chr01_1219194	0.79	0.21	0.21	0.34	0.39	0.34	0.28
57	chr01_1228799	0.97	0.03	0.03	0.06	0.06	0.06	0.06
58	chr01_1244279	0.96	0.04	0.04	0.07	0.07	0.07	0.07
59	chr01_1255975	0.27	0.73	0.27	0.39	0.52	0.39	0.31
60	chr01_1256142	0.8	0.2	0.2	0.32	0.39	0.32	0.27
61	chr01_1258756	0.96	0.04	0.04	0.09	0.09	0.09	0.08
62	chr01_1259087	0.51	0.49	0.49	0.5	0.94	0.5	0.37
63	chr01_1326388	0.94	0.06	0.06	0.11	0.12	0.11	0.11
64	chr01_1348741	0.2	0.8	0.2	0.33	0.41	0.33	0.27
65	chr01_1367988	0.53	0.47	0.47	0.5	0.79	0.5	0.37
66	chr01_1377573	0.58	0.42	0.42	0.49	0.82	0.49	0.37
67	chr01_1409715	0.84	0.16	0.16	0.27	0.32	0.27	0.23
68	chr01_1497589	0.97	0.03	0.03	0.06	0.06	0.06	0.05
69	chr01_1503163	0.85	0.15	0.15	0.25	0.3	0.25	0.22
70	chr01_1512070	0.88	0.12	0.12	0.22	0.25	0.22	0.19
71	chr01_1579114	0.79	0.21	0.21	0.33	0.41	0.33	0.27
72	chr01_1616798	0.62	0.38	0.38	0.47	0.76	0.47	0.36
73	chr01_1630160	0.69	0.31	0.31	0.43	0.62	0.43	0.34
74	chr01_1644793	0.94	0.06	0.06	0.11	0.12	0.11	0.1
75	chr01_1692123	0.94	0.06	0.06	0.1	0.11	0.1	0.1
76	chr01_1692794	0.63	0.37	0.37	0.46	0.67	0.46	0.36
77	chr01_1703192	0.43	0.57	0.43	0.49	0.83	0.49	0.37
78	chr01_1762455	0.6	0.4	0.4	0.48	0.8	0.48	0.37
79	chr01_1766395	0.97	0.03	0.03	0.05	0.05	0.05	0.05
80	chr01_1804792	0.81	0.19	0.19	0.31	0.38	0.31	0.26
81	chr01_1819974	0.3	0.7	0.3	0.42	0.54	0.42	0.33
82	chr01_1821599	0.67	0.33	0.33	0.44	0.62	0.44	0.35
83	chr01_1844266	0.5	0.5	0.5	0.5	0.87	0.5	0.37
84	chr01_1863918	0.2	0.8	0.2	0.33	0.4	0.33	0.27
85	chr01_1882181	0.33	0.67	0.33	0.44	0.55	0.44	0.34
86	chr01_1905861	0.69	0.31	0.31	0.43	0.61	0.43	0.34
87	chr01_1908791	0.39	0.61	0.39	0.48	0.78	0.48	0.36
88	chr01_1916269	0.68	0.32	0.32	0.44	0.64	0.44	0.34
89	chr01_1916800	0.74	0.26	0.26	0.39	0.53	0.39	0.31
90	chr01_1975000	0.38	0.62	0.38	0.47	0.72	0.47	0.36
91	chr01_1979185	0.85	0.15	0.15	0.26	0.31	0.26	0.23
92	chr01_1986620	0.69	0.31	0.31	0.43	0.62	0.43	0.34
93	chr01_1986674	0.69	0.31	0.31	0.43	0.62	0.43	0.34
94	chr01_1994147	0.49	0.51	0.49	0.5	0.87	0.5	0.37
95	chr01_2004600	0.93	0.07	0.07	0.13	0.14	0.13	0.12
96	chr01_2004903	0.71	0.29	0.29	0.41	0.58	0.41	0.33
97	chr01_2083910	0.86	0.14	0.14	0.25	0.29	0.25	0.22
98	chr01_2125573	0.99	0.01	0.01	0.03	0.03	0.03	0.03
99	chr01_2142641	0.7	0.3	0.3	0.42	0.59	0.42	0.33
100	chr01_2152954	0.62	0.38	0.38	0.47	0.66	0.47	0.36
101	chr01_2153560	0.79	0.21	0.21	0.33	0.41	0.33	0.27
102	chr01_2159181	0.99	0.01	0.01	0.02	0.02	0.02	0.02
103	chr01_2160795	0.62	0.38	0.38	0.47	0.73	0.47	0.36
104	chr01_2163659	0.95	0.05	0.05	0.09	0.1	0.09	0.09
105	chr01_2195994	0.87	0.13	0.13	0.22	0.24	0.22	0.2
106	chr01_2223999	0.56	0.44	0.44	0.49	0.89	0.49	0.37
107	chr01_2487224	0.55	0.45	0.45	0.5	0.85	0.5	0.37
108	chr01_2495981	0.08	0.92	0.08	0.14	0.15	0.14	0.13
109	chr01_2497119	0.52	0.48	0.48	0.5	0.86	0.5	0.37
110	chr01_2530170	0.35	0.65	0.35	0.45	0.68	0.45	0.35
111	chr01_2536793	0.83	0.17	0.17	0.28	0.34	0.28	0.24
112	chr01_2537345	0.34	0.66	0.34	0.45	0.67	0.45	0.35
113	chr01_2537726	0.74	0.26	0.26	0.39	0.52	0.39	0.31
114	chr01_2577573	0.82	0.18	0.18	0.3	0.37	0.3	0.25
115	chr01_2584832	0.8	0.2	0.2	0.32	0.39	0.32	0.27
116	chr01_2586304	0.82	0.18	0.18	0.29	0.36	0.29	0.25
117	chr01_2607128	0.93	0.07	0.07	0.14	0.15	0.14	0.13
118	chr01_2617236	0.51	0.49	0.49	0.5	0.91	0.5	0.37
119	chr01_2619991	0.95	0.05	0.05	0.1	0.09	0.1	0.1
120	chr01_2644394	0.48	0.52	0.48	0.5	0.94	0.5	0.37
121	chr01_2690797	0.52	0.48	0.48	0.5	0.86	0.5	0.37
122	chr01_2701581	0.88	0.12	0.12	0.21	0.24	0.21	0.19
123	chr01_2703864	0.68	0.32	0.32	0.44	0.65	0.44	0.34
124	chr01_2710391	0.81	0.19	0.19	0.31	0.36	0.31	0.26
125	chr01_2715199	0.92	0.08	0.08	0.15	0.16	0.15	0.14
126	chr01_2749596	0.67	0.33	0.33	0.45	0.67	0.45	0.35
127	chr01_2783995	0.84	0.16	0.16	0.27	0.32	0.27	0.23
128	chr01_2793314	0.74	0.26	0.26	0.38	0.52	0.38	0.31
129	chr01_2799992	0.96	0.04	0.04	0.07	0.07	0.07	0.07
130	chr01_2823711	0.63	0.37	0.37	0.47	0.72	0.47	0.36
131	chr01_2825566	0.84	0.16	0.16	0.27	0.33	0.27	0.24
132	chr01_2826395	0.65	0.35	0.35	0.45	0.64	0.45	0.35
133	chr01_2827522	0.8	0.2	0.2	0.32	0.41	0.32	0.27
134	chr01_2829162	0.53	0.47	0.47	0.5	0.82	0.5	0.37
135	chr01_2837586	0.96	0.04	0.04	0.08	0.08	0.08	0.08
136	chr01_2868145	0.56	0.44	0.44	0.49	0.87	0.49	0.37
137	chr01_2879038	0.67	0.33	0.33	0.44	0.65	0.44	0.34
138	chr01_2934649	0.98	0.02	0.02	0.03	0.03	0.03	0.03
139	chr01_2961802	0.59	0.41	0.41	0.48	0.8	0.48	0.37
140	chr01_2966057	0.03	0.97	0.03	0.06	0.06	0.06	0.06
141	chr01_2967161	0.6	0.4	0.4	0.48	0.8	0.48	0.37
142	chr01_2968173	0.61	0.39	0.39	0.47	0.65	0.47	0.36
143	chr01_3063018	0.9	0.1	0.1	0.19	0.21	0.19	0.17
144	chr01_3063998	0.78	0.22	0.22	0.35	0.45	0.35	0.29
145	chr01_3071194	0.05	0.95	0.05	0.1	0.09	0.1	0.1
146	chr01_3072782	0.96	0.04	0.04	0.07	0.07	0.07	0.07
147	chr01_3087983	0.89	0.11	0.11	0.19	0.22	0.19	0.18
148	chr01_3107146	0.83	0.17	0.17	0.28	0.33	0.28	0.24
149	chr01_3123840	0.6	0.4	0.4	0.48	0.78	0.48	0.36
150	chr01_3125582	0.74	0.26	0.26	0.39	0.53	0.39	0.31
151	chr01_3214907	0.83	0.17	0.17	0.28	0.34	0.28	0.24
152	chr01_3217590	0.48	0.52	0.48	0.5	0.92	0.5	0.37
153	chr01_3297505	0.39	0.61	0.39	0.48	0.72	0.48	0.36
154	chr01_3297525	0.88	0.12	0.12	0.22	0.25	0.22	0.19
155	chr01_3297610	0.72	0.28	0.28	0.4	0.54	0.4	0.32
156	chr01_3298654	0.5	0.5	0.5	0.5	0.85	0.5	0.37
157	chr01_3299991	0.98	0.02	0.02	0.03	0.03	0.03	0.03
158	chr01_3317977	0.78	0.22	0.22	0.34	0.44	0.34	0.28
159	chr01_3318427	0.79	0.21	0.21	0.33	0.42	0.33	0.28
160	chr01_3411952	0.53	0.47	0.47	0.5	0.88	0.5	0.37
161	chr01_3412447	0.54	0.46	0.46	0.5	0.91	0.5	0.37
162	chr01_3430349	0.21	0.79	0.21	0.34	0.43	0.34	0.28
163	chr01_3453579	0.98	0.02	0.02	0.05	0.05	0.05	0.05
164	chr01_3475197	0.88	0.12	0.12	0.21	0.24	0.21	0.19
165	chr01_3533220	0.48	0.52	0.48	0.5	0.86	0.5	0.37
166	chr01_3552097	0.95	0.05	0.05	0.09	0.1	0.09	0.09
167	chr01_3586395	0.9	0.1	0.1	0.18	0.2	0.18	0.16
168	chr01_3600000	0.96	0.04	0.04	0.07	0.08	0.07	0.07
169	chr01_3651900	0.68	0.32	0.32	0.44	0.52	0.44	0.34
170	chr01_3661599	0.37	0.63	0.37	0.47	0.73	0.47	0.36
171	chr01_3678399	0.98	0.02	0.02	0.04	0.04	0.04	0.04
172	chr01_3679982	0.58	0.42	0.42	0.49	0.6	0.49	0.37
173	chr01_3697600	0.98	0.02	0.02	0.03	0.03	0.03	0.03
174	chr01_3709565	0.91	0.09	0.09	0.16	0.18	0.16	0.15
175	chr01_3730701	0.52	0.48	0.48	0.5	0.91	0.5	0.37
176	chr01_3744040	0.43	0.57	0.43	0.49	0.84	0.49	0.37
177	chr01_3747946	0.52	0.48	0.48	0.5	0.92	0.5	0.37
178	chr01_3789573	0.95	0.05	0.05	0.1	0.1	0.1	0.09
179	chr01_3799956	0.98	0.02	0.02	0.04	0.04	0.04	0.04
180	chr01_3800705	0.37	0.63	0.37	0.47	0.73	0.47	0.36
181	chr01_3817651	0.5	0.5	0.5	0.5	0.96	0.5	0.37
182	chr01_3832330	0.6	0.4	0.4	0.48	0.76	0.48	0.36
183	chr01_3836789	0.47	0.53	0.47	0.5	0.89	0.5	0.37
184	chr01_3837566	0.59	0.41	0.41	0.48	0.82	0.48	0.37
185	chr01_3888419	0.31	0.69	0.31	0.43	0.63	0.43	0.34
186	chr01_3900504	0.32	0.68	0.32	0.43	0.63	0.43	0.34
187	chr01_3919709	0.05	0.95	0.05	0.1	0.1	0.1	0.09
188	chr01_3924797	0.31	0.69	0.31	0.43	0.62	0.43	0.34
189	chr01_3926671	0.67	0.33	0.33	0.44	0.66	0.44	0.35
190	chr01_3932007	0.57	0.43	0.43	0.49	0.84	0.49	0.37
191	chr01_3935999	0.59	0.41	0.41	0.48	0.79	0.48	0.37
192	chr01_3959847	0.1	0.9	0.1	0.17	0.19	0.17	0.16
193	chr01_4007948	0.66	0.34	0.34	0.45	0.65	0.45	0.35
194	chr01_4012293	0.69	0.31	0.31	0.43	0.61	0.43	0.34
195	chr01_4013228	0.51	0.49	0.49	0.5	0.94	0.5	0.37
196	chr01_4013853	0.75	0.25	0.25	0.38	0.51	0.38	0.31
197	chr01_4013949	0.13	0.87	0.13	0.23	0.26	0.23	0.2
198	chr01_4014415	0.65	0.35	0.35	0.46	0.59	0.46	0.35
199	chr01_4020170	0.5	0.5	0.5	0.5	1	0.5	0.38
200	chr01_4020317	0.89	0.11	0.11	0.2	0.22	0.2	0.18
201	chr01_4030399	0.68	0.32	0.32	0.44	0.64	0.44	0.34
202	chr01_4042400	0.76	0.24	0.24	0.37	0.47	0.37	0.3
203	chr01_4054753	0.4	0.6	0.4	0.48	0.79	0.48	0.37
204	chr01_4428770	0.85	0.15	0.15	0.25	0.3	0.25	0.22
205	chr01_4535197	0.55	0.45	0.45	0.49	0.82	0.49	0.37
206	chr01_4592988	0.81	0.19	0.19	0.3	0.37	0.3	0.26
207	chr01_4593103	0.75	0.25	0.25	0.37	0.5	0.37	0.3
208	chr01_4593244	0.53	0.47	0.47	0.5	0.95	0.5	0.37
209	chr01_4593283	0.86	0.14	0.14	0.24	0.28	0.24	0.21
210	chr01_4596586	0.51	0.49	0.49	0.5	0.91	0.5	0.37
211	chr01_4616913	0.88	0.12	0.12	0.22	0.25	0.22	0.19
212	chr01_4631969	0.94	0.06	0.06	0.11	0.12	0.11	0.1
213	chr01_4643672	0.69	0.31	0.31	0.43	0.61	0.43	0.34
214	chr01_4721756	0.75	0.25	0.25	0.38	0.5	0.38	0.31
215	chr01_4787996	0.82	0.18	0.18	0.3	0.36	0.3	0.25
216	chr01_4825469	0.8	0.2	0.2	0.32	0.27	0.32	0.27
217	chr01_4910396	0.81	0.19	0.19	0.31	0.39	0.31	0.26
218	chr01_4915170	0.8	0.2	0.2	0.33	0.41	0.33	0.27
219	chr01_4996079	0.66	0.34	0.34	0.45	0.64	0.45	0.35
220	chr01_4996082	0.97	0.03	0.03	0.06	0.06	0.06	0.06
221	chr01_5000776	0.79	0.21	0.21	0.33	0.42	0.33	0.28
222	chr01_5017571	0.95	0.05	0.05	0.1	0.11	0.1	0.1
223	chr01_5037549	0.79	0.21	0.21	0.33	0.32	0.33	0.28
224	chr01_5038369	0.28	0.72	0.28	0.4	0.55	0.4	0.32
225	chr01_5081475	0.84	0.16	0.16	0.27	0.32	0.27	0.23
226	chr01_5098397	0.49	0.51	0.49	0.5	0.87	0.5	0.37
227	chr01_5323711	0.48	0.52	0.48	0.5	0.75	0.5	0.37
228	chr01_5654532	0.41	0.59	0.41	0.48	0.79	0.48	0.37
229	chr01_5715948	0.97	0.03	0.03	0.06	0.06	0.06	0.06
230	chr01_5729084	0.37	0.63	0.37	0.46	0.64	0.46	0.36
231	chr01_5729429	0.84	0.16	0.16	0.27	0.32	0.27	0.23
232	chr01_5771982	0.49	0.51	0.49	0.5	0.86	0.5	0.37
233	chr01_5773579	0.76	0.24	0.24	0.37	0.48	0.37	0.3
234	chr01_5790231	0.84	0.16	0.16	0.26	0.31	0.26	0.23
235	chr01_5791901	0.84	0.16	0.16	0.27	0.32	0.27	0.24
236	chr01_5795190	0.9	0.1	0.1	0.18	0.2	0.18	0.16
237	chr01_6012003	0.42	0.58	0.42	0.49	0.84	0.49	0.37
238	chr01_6027200	0.9	0.1	0.1	0.18	0.2	0.18	0.16
239	chr01_6037709	0.73	0.27	0.27	0.39	0.53	0.39	0.31
240	chr01_6058357	0.9	0.1	0.1	0.18	0.2	0.18	0.16
241	chr01_6061848	0.87	0.13	0.13	0.23	0.26	0.23	0.2
242	chr01_6073226	0.97	0.03	0.03	0.05	0.05	0.05	0.05
243	chr01_6097814	0.72	0.28	0.28	0.4	0.43	0.4	0.32
244	chr01_6098379	0.81	0.19	0.19	0.3	0.37	0.3	0.26
245	chr01_6105530	0.6	0.4	0.4	0.48	0.77	0.48	0.36
246	chr01_6123193	0.94	0.06	0.06	0.12	0.13	0.12	0.11
247	chr01_6136781	0.74	0.26	0.26	0.39	0.52	0.39	0.31
248	chr01_6138101	0.83	0.17	0.17	0.29	0.35	0.29	0.24
249	chr01_6152430	0.28	0.72	0.28	0.4	0.54	0.4	0.32
250	chr01_6162823	0.68	0.32	0.32	0.43	0.63	0.43	0.34
251	chr01_6181590	0.54	0.46	0.46	0.5	0.83	0.5	0.37
252	chr01_6183443	0.68	0.32	0.32	0.44	0.64	0.44	0.34
253	chr01_6183454	0.37	0.63	0.37	0.47	0.73	0.47	0.36
254	chr01_6185593	0.53	0.47	0.47	0.5	0.81	0.5	0.37
255	chr01_6212693	0.65	0.35	0.35	0.45	0.69	0.45	0.35
256	chr01_6216570	0.36	0.64	0.36	0.46	0.72	0.46	0.36
257	chr01_6218999	0.36	0.64	0.36	0.46	0.72	0.46	0.36
258	chr01_6221572	0.18	0.82	0.18	0.29	0.36	0.29	0.25
259	chr01_6234688	0.5	0.5	0.5	0.5	0.94	0.5	0.37
260	chr01_6242398	0.73	0.27	0.27	0.4	0.55	0.4	0.32
261	chr01_6242823	0.58	0.42	0.42	0.49	0.79	0.49	0.37
262	chr01_6246368	0.89	0.11	0.11	0.2	0.22	0.2	0.18
263	chr01_6306394	0.84	0.16	0.16	0.26	0.31	0.26	0.23
264	chr01_6807976	0.62	0.38	0.38	0.47	0.76	0.47	0.36
265	chr01_6808622	0.95	0.05	0.05	0.09	0.09	0.09	0.08
266	chr01_6896778	0.8	0.2	0.2	0.32	0.4	0.32	0.27
267	chr01_6952825	0.98	0.02	0.02	0.04	0.04	0.04	0.04
268	chr01_6952876	0.84	0.16	0.16	0.27	0.32	0.27	0.23
269	chr01_6952900	0.69	0.31	0.31	0.43	0.56	0.43	0.34
270	chr01_6953278	0.58	0.42	0.42	0.49	0.84	0.49	0.37
271	chr01_6953291	0.92	0.08	0.08	0.15	0.16	0.15	0.14
272	chr01_6953419	0.86	0.14	0.14	0.24	0.28	0.24	0.21
273	chr01_7025123	0.61	0.39	0.39	0.47	0.75	0.47	0.36
274	chr01_7025574	0.98	0.02	0.02	0.04	0.04	0.04	0.04
275	chr01_7067191	0.89	0.11	0.11	0.2	0.22	0.2	0.18
276	chr01_7090014	0.7	0.3	0.3	0.42	0.56	0.42	0.33
277	chr01_7093704	0.85	0.15	0.15	0.26	0.3	0.26	0.22
278	chr01_7151101	0.74	0.26	0.26	0.38	0.51	0.38	0.31
279	chr01_7151828	0.73	0.27	0.27	0.39	0.53	0.39	0.31
280	chr01_7154282	0.65	0.35	0.35	0.46	0.66	0.46	0.35
281	chr01_7184709	0.36	0.64	0.36	0.46	0.72	0.46	0.35
282	chr01_7184764	0.52	0.48	0.48	0.5	0.87	0.5	0.37
283	chr01_7186193	0.36	0.64	0.36	0.46	0.72	0.46	0.36
284	chr01_7313599	0.97	0.03	0.03	0.06	0.07	0.06	0.06
285	chr01_7396779	0.87	0.13	0.13	0.22	0.26	0.22	0.2
286	chr01_7476762	0.59	0.41	0.41	0.48	0.79	0.48	0.37
287	chr01_7497599	0.77	0.23	0.23	0.36	0.45	0.36	0.29
288	chr01_7501568	0.6	0.4	0.4	0.48	0.79	0.48	0.37
289	chr01_7509642	0.35	0.65	0.35	0.46	0.71	0.46	0.35
290	chr01_7540788	0.93	0.07	0.07	0.13	0.14	0.13	0.12
291	chr01_7582409	0.72	0.28	0.28	0.4	0.52	0.4	0.32
292	chr01_7802542	0.93	0.07	0.07	0.14	0.15	0.14	0.13
293	chr01_7835604	0.55	0.45	0.45	0.5	0.8	0.5	0.37
294	chr01_7889337	0.89	0.11	0.11	0.19	0.21	0.19	0.17
295	chr01_7894396	0.7	0.3	0.3	0.42	0.43	0.42	0.33
296	chr01_7915000	0.93	0.07	0.07	0.13	0.14	0.13	0.13
297	chr01_8032794	0.64	0.36	0.36	0.46	0.67	0.46	0.35
298	chr01_8087194	0.59	0.41	0.41	0.48	0.81	0.48	0.37
299	chr01_8137991	0.96	0.04	0.04	0.07	0.07	0.07	0.07
300	chr01_8195981	0.5	0.5	0.5	0.5	0.53	0.5	0.37
301	chr01_8196782	0.91	0.09	0.09	0.16	0.17	0.16	0.15
302	chr01_8223994	0.87	0.13	0.13	0.22	0.25	0.22	0.2
303	chr01_8377934	0.71	0.29	0.29	0.41	0.59	0.41	0.33
304	chr01_8445587	0.77	0.23	0.23	0.36	0.47	0.36	0.29
305	chr01_8579970	0.92	0.08	0.08	0.15	0.16	0.15	0.14
306	chr01_8589599	0.96	0.04	0.04	0.07	0.08	0.07	0.07
307	chr01_8604059	0.67	0.33	0.33	0.44	0.67	0.44	0.35
308	chr01_8713517	0.04	0.96	0.04	0.07	0.08	0.07	0.07
309	chr01_8907178	0.93	0.07	0.07	0.14	0.15	0.14	0.13
310	chr01_8938397	0.37	0.63	0.37	0.46	0.72	0.46	0.36
311	chr01_9087774	0.56	0.44	0.44	0.49	0.79	0.49	0.37
312	chr01_9704779	0.99	0.01	0.01	0.02	0.02	0.02	0.02
313	chr01_9770507	0.53	0.47	0.47	0.5	0.86	0.5	0.37
314	chr01_9770531	0.39	0.61	0.39	0.48	0.77	0.48	0.36
315	chr01_9770858	0.7	0.3	0.3	0.42	0.59	0.42	0.33
316	chr01_9844596	0.97	0.03	0.03	0.06	0.07	0.06	0.06
317	chr01_10010885	0.77	0.23	0.23	0.35	0.44	0.35	0.29
318	chr01_10210257	0.92	0.08	0.08	0.15	0.16	0.15	0.14
319	chr01_10499373	0.72	0.28	0.28	0.41	0.55	0.41	0.32
320	chr01_10541573	0.95	0.05	0.05	0.09	0.09	0.09	0.08
321	chr01_10542399	0.97	0.03	0.03	0.07	0.07	0.07	0.06
322	chr01_10656195	0.89	0.11	0.11	0.19	0.21	0.19	0.17
323	chr01_10766423	0.55	0.45	0.45	0.49	0.78	0.49	0.37
324	chr01_10821096	0.22	0.78	0.22	0.34	0.44	0.34	0.28
325	chr01_10822585	0.54	0.46	0.46	0.5	0.84	0.5	0.37
326	chr01_10918192	0.21	0.79	0.21	0.34	0.43	0.34	0.28
327	chr01_10922797	0.41	0.59	0.41	0.48	0.82	0.48	0.37
328	chr01_10923978	0.93	0.07	0.07	0.13	0.14	0.13	0.12
329	chr01_10925976	0.66	0.34	0.34	0.45	0.68	0.45	0.35
330	chr01_10929595	0.52	0.48	0.48	0.5	0.96	0.5	0.37
331	chr01_11126333	0.89	0.11	0.11	0.2	0.23	0.2	0.18
332	chr01_11139408	0.82	0.18	0.18	0.3	0.36	0.3	0.25
333	chr01_11651093	0.83	0.17	0.17	0.28	0.34	0.28	0.24
334	chr01_11843166	0.93	0.07	0.07	0.13	0.14	0.13	0.13
335	chr01_11870964	0.54	0.46	0.46	0.5	0.48	0.5	0.37
336	chr01_12643802	0.32	0.68	0.32	0.44	0.65	0.44	0.34
337	chr01_12747501	0.93	0.07	0.07	0.14	0.15	0.14	0.13
338	chr01_12753563	0.97	0.03	0.03	0.05	0.06	0.05	0.05
339	chr01_12770177	0.71	0.29	0.29	0.41	0.58	0.41	0.33
340	chr01_12770327	0.67	0.33	0.33	0.44	0.65	0.44	0.34
341	chr01_12917838	0.29	0.71	0.29	0.41	0.58	0.41	0.33
342	chr01_12918349	0.92	0.08	0.08	0.15	0.16	0.15	0.14
343	chr01_12919202	0.33	0.67	0.33	0.44	0.66	0.44	0.34
344	chr01_12919593	0.34	0.66	0.34	0.45	0.61	0.45	0.35
345	chr01_12995990	0.92	0.08	0.08	0.14	0.15	0.14	0.13
346	chr01_13003997	0.78	0.22	0.22	0.35	0.44	0.35	0.29
347	chr01_13027433	0.66	0.34	0.34	0.45	0.67	0.45	0.35
348	chr01_13027994	0.7	0.3	0.3	0.42	0.61	0.42	0.33
349	chr01_13028845	0.73	0.27	0.27	0.4	0.54	0.4	0.32
350	chr01_13037591	0.93	0.07	0.07	0.12	0.13	0.12	0.12
351	chr01_13042392	0.73	0.27	0.27	0.4	0.52	0.4	0.32
352	chr01_13740478	0.68	0.32	0.32	0.43	0.59	0.43	0.34
353	chr01_13740835	0.78	0.22	0.22	0.34	0.42	0.34	0.28
354	chr01_13741447	0.92	0.08	0.08	0.14	0.16	0.14	0.13
355	chr01_13746383	0.98	0.02	0.02	0.04	0.04	0.04	0.04
356	chr01_13826803	0.57	0.43	0.43	0.49	0.87	0.49	0.37
357	chr01_13826932	0.61	0.39	0.39	0.48	0.78	0.48	0.36
358	chr01_13828765	0.72	0.28	0.28	0.4	0.55	0.4	0.32
359	chr01_13828883	0.71	0.29	0.29	0.41	0.58	0.41	0.33
360	chr01_13833466	0.92	0.08	0.08	0.14	0.15	0.14	0.13
361	chr01_13835994	0.73	0.27	0.27	0.39	0.54	0.39	0.32
362	chr01_13853596	0.53	0.47	0.47	0.5	0.89	0.5	0.37
363	chr01_13857879	0.62	0.38	0.38	0.47	0.74	0.47	0.36
364	chr01_13859718	0.42	0.58	0.42	0.49	0.8	0.49	0.37
365	chr01_13902384	0.49	0.51	0.49	0.5	0.8	0.5	0.37
366	chr01_13988793	0.97	0.03	0.03	0.06	0.07	0.06	0.06
367	chr01_14395811	0.76	0.24	0.24	0.37	0.48	0.37	0.3
368	chr01_14542828	0.59	0.41	0.41	0.48	0.79	0.48	0.37
369	chr01_14835874	0.74	0.26	0.26	0.38	0.52	0.38	0.31
370	chr01_14836489	0.92	0.08	0.08	0.14	0.15	0.14	0.13
371	chr01_14836517	0.56	0.44	0.44	0.49	0.87	0.49	0.37
372	chr01_14837848	0.73	0.27	0.27	0.39	0.52	0.39	0.32
373	chr01_14839778	0.93	0.07	0.07	0.13	0.14	0.13	0.12
374	chr01_15205319	0.3	0.7	0.3	0.42	0.6	0.42	0.33
375	chr01_15206373	0.94	0.06	0.06	0.11	0.11	0.11	0.1
376	chr01_15207199	0.76	0.24	0.24	0.37	0.48	0.37	0.3
377	chr01_15212788	0.95	0.05	0.05	0.1	0.11	0.1	0.1
378	chr01_15220752	0.93	0.07	0.07	0.14	0.15	0.14	0.13
379	chr01_16599143	0.74	0.26	0.26	0.39	0.52	0.39	0.31
380	chr01_16607196	0.88	0.12	0.12	0.22	0.25	0.22	0.19
381	chr01_16608791	0.96	0.04	0.04	0.08	0.08	0.08	0.07
382	chr01_16633586	0.93	0.07	0.07	0.13	0.14	0.13	0.12
383	chr01_17079184	0.72	0.28	0.28	0.41	0.47	0.41	0.32
384	chr01_18390692	0.94	0.06	0.06	0.12	0.13	0.12	0.11
385	chr01_18391427	0.69	0.31	0.31	0.43	0.62	0.43	0.34
386	chr01_18506784	0.94	0.06	0.06	0.12	0.12	0.12	0.11
387	chr01_18507894	0.64	0.36	0.36	0.46	0.69	0.46	0.35
388	chr01_19194410	0.66	0.34	0.34	0.45	0.68	0.45	0.35
389	chr01_19194546	0.38	0.62	0.38	0.47	0.71	0.47	0.36
390	chr01_19194620	0.93	0.07	0.07	0.13	0.14	0.13	0.12
391	chr01_19230915	0.93	0.07	0.07	0.12	0.13	0.12	0.12
392	chr01_19458548	0.44	0.56	0.44	0.49	0.81	0.49	0.37
393	chr01_19571998	0.78	0.22	0.22	0.34	0.4	0.34	0.28
394	chr01_20535988	0.71	0.29	0.29	0.41	0.57	0.41	0.33
395	chr01_20807999	0.85	0.15	0.15	0.26	0.29	0.26	0.22
396	chr01_21957271	0.67	0.33	0.33	0.44	0.63	0.44	0.34
397	chr01_22053494	0.94	0.06	0.06	0.12	0.13	0.12	0.11
398	chr01_22300080	0.84	0.16	0.16	0.27	0.32	0.27	0.23
399	chr01_22300281	0.81	0.19	0.19	0.31	0.39	0.31	0.26
400	chr01_22757582	0.85	0.15	0.15	0.25	0.29	0.25	0.22
401	chr01_23016065	0.71	0.29	0.29	0.41	0.55	0.41	0.33
402	chr01_24491738	0.52	0.48	0.48	0.5	0.96	0.5	0.37
403	chr01_24492324	0.72	0.28	0.28	0.4	0.55	0.4	0.32
404	chr01_25120829	0.25	0.75	0.25	0.38	0.49	0.38	0.3
405	chr01_25932783	0.94	0.06	0.06	0.11	0.12	0.11	0.1
406	chr01_25934391	0.71	0.29	0.29	0.42	0.57	0.42	0.33
407	chr01_26027819	0.72	0.28	0.28	0.41	0.51	0.41	0.32
408	chr01_26447191	0.7	0.3	0.3	0.42	0.59	0.42	0.33
409	chr01_26456775	0.66	0.34	0.34	0.45	0.65	0.45	0.35
410	chr01_26458393	0.93	0.07	0.07	0.13	0.14	0.13	0.12
411	chr01_26944680	0.93	0.07	0.07	0.12	0.13	0.12	0.12
412	chr01_27197405	0.72	0.28	0.28	0.41	0.57	0.41	0.32
413	chr01_27197436	0.71	0.29	0.29	0.41	0.57	0.41	0.32
414	chr01_27219985	0.94	0.06	0.06	0.11	0.12	0.11	0.1
415	chr01_27414468	0.96	0.04	0.04	0.08	0.08	0.08	0.08
416	chr01_27587993	0.97	0.03	0.03	0.06	0.06	0.06	0.06
417	chr01_27645050	0.53	0.47	0.47	0.5	0.88	0.5	0.37
418	chr01_27651127	0.32	0.68	0.32	0.43	0.63	0.43	0.34
419	chr01_28283092	0.68	0.32	0.32	0.44	0.47	0.44	0.34
420	chr01_28488794	0.91	0.09	0.09	0.17	0.19	0.17	0.16
421	chr01_28553589	0.59	0.41	0.41	0.48	0.82	0.48	0.37
422	chr01_28691988	0.98	0.02	0.02	0.04	0.04	0.04	0.04
423	chr01_29130384	0.72	0.28	0.28	0.4	0.41	0.4	0.32
424	chr01_29155999	0.9	0.1	0.1	0.17	0.18	0.17	0.16
425	chr01_30110987	0.86	0.14	0.14	0.23	0.27	0.23	0.21
426	chr01_30111362	0.85	0.15	0.15	0.25	0.29	0.25	0.22
427	chr01_30394600	0.96	0.04	0.04	0.07	0.08	0.07	0.07
428	chr01_30396380	0.89	0.11	0.11	0.19	0.21	0.19	0.17
429	chr01_30898372	0.82	0.18	0.18	0.3	0.36	0.3	0.25
430	chr01_30905585	0.75	0.25	0.25	0.37	0.49	0.37	0.3
431	chr01_30906400	0.82	0.18	0.18	0.3	0.36	0.3	0.25
432	chr01_30939930	0.24	0.76	0.24	0.37	0.48	0.37	0.3
433	chr01_31358944	0.96	0.04	0.04	0.08	0.08	0.08	0.08
434	chr01_31358989	0.64	0.36	0.36	0.46	0.71	0.46	0.36
435	chr01_31362400	0.83	0.17	0.17	0.28	0.33	0.28	0.24
436	chr01_32209573	0.73	0.27	0.27	0.39	0.53	0.39	0.32
437	chr01_32239405	0.9	0.1	0.1	0.18	0.2	0.18	0.17
438	chr01_32239692	0.93	0.07	0.07	0.13	0.14	0.13	0.12
439	chr01_32239740	0.55	0.45	0.45	0.5	0.85	0.5	0.37
440	chr01_32240276	0.74	0.26	0.26	0.38	0.51	0.38	0.31
441	chr01_32587026	0.75	0.25	0.25	0.38	0.5	0.38	0.3
442	chr01_32591814	0.35	0.65	0.35	0.45	0.69	0.45	0.35
443	chr01_32755038	0.63	0.37	0.37	0.46	0.72	0.46	0.36
444	chr01_32756701	0.81	0.19	0.19	0.31	0.39	0.31	0.26
445	chr01_32818400	0.54	0.46	0.46	0.5	0.78	0.5	0.37
446	chr01_32825776	0.76	0.24	0.24	0.36	0.47	0.36	0.3
447	chr01_32895995	0.55	0.45	0.45	0.5	0.91	0.5	0.37
448	chr01_33659383	0.75	0.25	0.25	0.38	0.46	0.38	0.31
449	chr01_33716089	0.56	0.44	0.44	0.49	0.81	0.49	0.37
450	chr01_33718797	0.55	0.45	0.45	0.5	0.82	0.5	0.37
451	chr01_33719340	0.47	0.53	0.47	0.5	0.86	0.5	0.37
452	chr01_34099957	0.08	0.92	0.08	0.14	0.15	0.14	0.13
453	chr01_34112792	0.7	0.3	0.3	0.42	0.49	0.42	0.33
454	chr01_34774393	0.93	0.07	0.07	0.13	0.14	0.13	0.12
455	chr01_34971396	0.75	0.25	0.25	0.37	0.5	0.37	0.3
456	chr01_35398281	0.79	0.21	0.21	0.33	0.39	0.33	0.28
457	chr01_35398310	0.8	0.2	0.2	0.32	0.41	0.32	0.27
458	chr01_35402397	0.98	0.02	0.02	0.04	0.05	0.04	0.04
459	chr01_36352743	0.93	0.07	0.07	0.13	0.14	0.13	0.12
460	chr01_36364794	0.75	0.25	0.25	0.37	0.49	0.37	0.3
461	chr01_36497303	0.95	0.05	0.05	0.1	0.1	0.1	0.09
462	chr01_36620071	0.93	0.07	0.07	0.13	0.14	0.13	0.12
463	chr01_36642383	0.68	0.32	0.32	0.44	0.64	0.44	0.34
464	chr01_36647145	0.97	0.03	0.03	0.06	0.06	0.06	0.06
465	chr01_41010353	0.77	0.23	0.23	0.36	0.47	0.36	0.29
466	chr01_41015994	0.01	0.99	0.01	0.02	0.02	0.02	0.02
467	chr01_41606391	0.92	0.08	0.08	0.14	0.15	0.14	0.13
468	chr01_41870384	0.75	0.25	0.25	0.38	0.5	0.38	0.31
469	chr01_42171196	0.7	0.3	0.3	0.42	0.6	0.42	0.33
470	chr01_42187993	0.98	0.02	0.02	0.05	0.05	0.05	0.05
471	chr01_42349571	0.95	0.05	0.05	0.09	0.09	0.09	0.08
472	chr01_42358425	0.8	0.2	0.2	0.32	0.39	0.32	0.27
473	chr01_42358430	0.68	0.32	0.32	0.44	0.62	0.44	0.34
474	chr01_42360405	0.71	0.29	0.29	0.41	0.58	0.41	0.33
475	chr01_42360839	0.78	0.22	0.22	0.35	0.45	0.35	0.29
476	chr01_42361100	0.96	0.04	0.04	0.07	0.07	0.07	0.07
477	chr01_42363583	0.8	0.2	0.2	0.32	0.4	0.32	0.27
478	chr01_42759999	0.96	0.04	0.04	0.08	0.08	0.08	0.08
479	chr01_42768573	0.94	0.06	0.06	0.12	0.13	0.12	0.11
480	chr01_43149564	0.84	0.16	0.16	0.27	0.32	0.27	0.23
481	chr01_43491628	0.46	0.54	0.46	0.5	0.86	0.5	0.37
482	chr01_43575188	0.74	0.26	0.26	0.39	0.47	0.39	0.31
483	chr01_43584933	0.47	0.53	0.47	0.5	0.54	0.5	0.37
484	chr01_43704451	0.93	0.07	0.07	0.13	0.14	0.13	0.12
485	chr01_43734290	0.47	0.53	0.47	0.5	0.88	0.5	0.37
486	chr01_43742985	0.92	0.08	0.08	0.14	0.16	0.14	0.13
487	chr01_44489586	0.61	0.39	0.39	0.47	0.75	0.47	0.36
488	chr01_44581594	0.93	0.07	0.07	0.12	0.13	0.12	0.12
489	chr01_44603181	0.57	0.43	0.43	0.49	0.86	0.49	0.37
490	chr01_44672176	0.56	0.44	0.44	0.49	0.83	0.49	0.37
491	chr01_44725765	0.8	0.2	0.2	0.32	0.4	0.32	0.27
492	chr01_44816915	0.95	0.05	0.05	0.1	0.1	0.1	0.09
493	chr01_44854398	0.74	0.26	0.26	0.39	0.53	0.39	0.31
494	chr01_45112231	0.88	0.12	0.12	0.21	0.24	0.21	0.19
495	chr01_45129165	0.67	0.33	0.33	0.44	0.65	0.44	0.35
496	chr01_45588428	0.56	0.44	0.44	0.49	0.88	0.49	0.37
497	chr01_45588628	0.75	0.25	0.25	0.37	0.49	0.37	0.3
498	chr01_45589178	0.96	0.04	0.04	0.07	0.07	0.07	0.07
499	chr01_45589555	0.7	0.3	0.3	0.42	0.59	0.42	0.33
500	chr01_45593583	0.47	0.53	0.47	0.5	0.89	0.5	0.37
501	chr01_45933274	0.5	0.5	0.5	0.5	0.91	0.5	0.37
502	chr01_45934536	0.93	0.07	0.07	0.12	0.13	0.12	0.12
503	chr01_45934795	0.93	0.07	0.07	0.14	0.15	0.14	0.13
504	chr01_46748368	0.74	0.26	0.26	0.38	0.51	0.38	0.31
505	chr01_47571951	0.01	0.99	0.01	0.02	0.02	0.02	0.02
506	chr01_47576191	0.53	0.47	0.47	0.5	0.88	0.5	0.37
507	chr01_47597026	0.95	0.05	0.05	0.1	0.1	0.1	0.09
508	chr01_48040059	0.51	0.49	0.49	0.5	0.88	0.5	0.37
509	chr01_48041168	0.51	0.49	0.49	0.5	0.89	0.5	0.37
510	chr01_48059834	0.56	0.44	0.44	0.49	0.84	0.49	0.37
511	chr01_48060995	0.74	0.26	0.26	0.39	0.49	0.39	0.31
512	chr01_48277808	0.5	0.5	0.5	0.5	0.87	0.5	0.37
513	chr01_48280028	0.74	0.26	0.26	0.38	0.51	0.38	0.31
514	chr01_48280367	0.67	0.33	0.33	0.44	0.66	0.44	0.34
515	chr01_48445768	0.67	0.33	0.33	0.44	0.65	0.44	0.34
516	chr01_48474617	0.86	0.14	0.14	0.24	0.28	0.24	0.21
517	chr01_48487984	0.75	0.25	0.25	0.37	0.5	0.37	0.3
518	chr01_48490970	0.7	0.3	0.3	0.42	0.6	0.42	0.33
519	chr01_48498501	0.56	0.44	0.44	0.49	0.84	0.49	0.37
520	chr01_48628702	0.93	0.07	0.07	0.13	0.14	0.13	0.12
521	chr01_49047097	0.67	0.33	0.33	0.44	0.65	0.44	0.34
522	chr01_49047838	0.96	0.04	0.04	0.08	0.08	0.08	0.08
523	chr01_49674279	0.73	0.27	0.27	0.4	0.54	0.4	0.32
524	chr01_49882151	0.93	0.07	0.07	0.13	0.14	0.13	0.12
525	chr01_49882190	0.68	0.32	0.32	0.43	0.62	0.43	0.34
526	chr01_50145474	0.96	0.04	0.04	0.08	0.08	0.08	0.08
527	chr01_50162396	0.58	0.42	0.42	0.49	0.82	0.49	0.37
528	chr01_50165595	0.92	0.08	0.08	0.14	0.15	0.14	0.13
529	chr01_50190193	0.94	0.06	0.06	0.11	0.12	0.11	0.11
530	chr01_50190820	0.68	0.32	0.32	0.44	0.64	0.44	0.34
531	chr01_50231351	0.98	0.02	0.02	0.04	0.04	0.04	0.04
532	chr01_50307990	0.97	0.03	0.03	0.07	0.07	0.07	0.06
533	chr01_51101131	0.93	0.07	0.07	0.14	0.15	0.14	0.13
534	chr01_51442400	0.47	0.53	0.47	0.5	0.89	0.5	0.37
535	chr01_51532951	0.68	0.32	0.32	0.43	0.63	0.43	0.34
536	chr01_51543199	0.99	0.01	0.01	0.02	0.02	0.02	0.02
537	chr01_51572796	0.94	0.06	0.06	0.11	0.12	0.11	0.1
538	chr01_52221191	0.88	0.12	0.12	0.21	0.24	0.21	0.19
539	chr01_52241578	0.99	0.01	0.01	0.02	0.02	0.02	0.02
540	chr01_52942441	0.93	0.07	0.07	0.12	0.13	0.12	0.12
541	chr01_52945656	0.93	0.07	0.07	0.13	0.14	0.13	0.12
542	chr01_52949911	0.94	0.06	0.06	0.12	0.12	0.12	0.11
543	chr01_52993259	0.94	0.06	0.06	0.12	0.13	0.12	0.11
544	chr01_52994396	0.93	0.07	0.07	0.14	0.15	0.14	0.13
545	chr01_52994493	0.93	0.07	0.07	0.12	0.13	0.12	0.12
546	chr01_52994623	0.95	0.05	0.05	0.09	0.09	0.09	0.09
547	chr01_52996111	0.76	0.24	0.24	0.37	0.48	0.37	0.3
548	chr01_52996497	0.51	0.49	0.49	0.5	0.97	0.5	0.37
549	chr01_52996601	0.5	0.5	0.5	0.5	0.99	0.5	0.37
550	chr01_53413573	0.77	0.23	0.23	0.35	0.46	0.35	0.29
551	chr01_53418785	0.71	0.29	0.29	0.41	0.53	0.41	0.33
552	chr01_53436612	0.92	0.08	0.08	0.15	0.16	0.15	0.14
553	chr01_53436948	0.73	0.27	0.27	0.39	0.53	0.39	0.31
554	chr01_53438215	0.54	0.46	0.46	0.5	0.82	0.5	0.37
555	chr01_53440650	0.98	0.02	0.02	0.04	0.04	0.04	0.04
556	chr01_53444045	0.46	0.54	0.46	0.5	0.85	0.5	0.37
557	chr01_53445295	0.96	0.04	0.04	0.08	0.08	0.08	0.08
558	chr01_53446252	0.74	0.26	0.26	0.39	0.52	0.39	0.31
559	chr01_53779194	0.95	0.05	0.05	0.1	0.1	0.1	0.09
560	chr01_53956795	0.94	0.06	0.06	0.11	0.12	0.11	0.1
561	chr01_53968796	0.9	0.1	0.1	0.17	0.19	0.17	0.16
562	chr01_53983155	0.44	0.56	0.44	0.49	0.7	0.49	0.37
563	chr01_53987189	0.94	0.06	0.06	0.12	0.13	0.12	0.11
564	chr01_54049174	0.84	0.16	0.16	0.27	0.33	0.27	0.24
565	chr01_54270396	0.61	0.39	0.39	0.47	0.73	0.47	0.36
566	chr01_54306954	0.86	0.14	0.14	0.25	0.29	0.25	0.22
567	chr01_54346342	0.94	0.06	0.06	0.11	0.12	0.11	0.1
568	chr01_54354238	0.9	0.1	0.1	0.19	0.21	0.19	0.17
569	chr01_54434652	0.85	0.15	0.15	0.25	0.29	0.25	0.22
570	chr01_54435061	0.47	0.53	0.47	0.5	0.87	0.5	0.37
571	chr01_54437579	0.79	0.21	0.21	0.33	0.41	0.33	0.27
572	chr01_54439010	0.31	0.69	0.31	0.43	0.59	0.43	0.34
573	chr01_54439022	0.8	0.2	0.2	0.32	0.39	0.32	0.27
574	chr01_54439355	0.36	0.64	0.36	0.46	0.72	0.46	0.36
575	chr01_54439990	0.86	0.14	0.14	0.25	0.29	0.25	0.22
576	chr01_54702386	0.57	0.43	0.43	0.49	0.8	0.49	0.37
577	chr01_54738399	0.83	0.17	0.17	0.28	0.34	0.28	0.24
578	chr01_54739195	0.47	0.53	0.47	0.5	0.77	0.5	0.37
579	chr01_54752721	0.8	0.2	0.2	0.32	0.4	0.32	0.27
580	chr01_55227584	0.56	0.44	0.44	0.49	0.76	0.49	0.37
581	chr01_55239603	0.89	0.11	0.11	0.2	0.22	0.2	0.18
582	chr01_55642025	0.94	0.06	0.06	0.12	0.13	0.12	0.11
583	chr01_55642075	0.87	0.13	0.13	0.23	0.26	0.23	0.2
584	chr01_55643970	0.91	0.09	0.09	0.17	0.19	0.17	0.16
585	chr01_55646769	0.77	0.23	0.23	0.36	0.46	0.36	0.29
586	chr01_55649688	0.75	0.25	0.25	0.38	0.51	0.38	0.31
587	chr01_55772778	0.94	0.06	0.06	0.12	0.13	0.12	0.11
588	chr01_55773879	0.84	0.16	0.16	0.27	0.32	0.27	0.23
589	chr01_55811663	0.45	0.55	0.45	0.49	0.86	0.49	0.37
590	chr01_55814699	0.7	0.3	0.3	0.42	0.58	0.42	0.33
591	chr01_55816248	0.81	0.19	0.19	0.31	0.38	0.31	0.26
592	chr01_55869343	0.76	0.24	0.24	0.37	0.49	0.37	0.3
593	chr01_55873054	0.76	0.24	0.24	0.37	0.49	0.37	0.3
594	chr01_55874486	0.85	0.15	0.15	0.25	0.29	0.25	0.22
595	chr01_56169578	0.83	0.17	0.17	0.28	0.33	0.28	0.24
596	chr01_56171068	0.96	0.04	0.04	0.08	0.08	0.08	0.07
597	chr01_56177513	0.68	0.32	0.32	0.44	0.56	0.44	0.34
598	chr01_56205425	0.53	0.47	0.47	0.5	0.78	0.5	0.37
599	chr01_56205815	0.63	0.37	0.37	0.46	0.72	0.46	0.36
600	chr01_56213037	0.84	0.16	0.16	0.26	0.31	0.26	0.23
601	chr01_56323979	0.78	0.22	0.22	0.35	0.44	0.35	0.29
602	chr01_56325574	0.94	0.06	0.06	0.11	0.12	0.11	0.11
603	chr01_57015817	0.88	0.12	0.12	0.22	0.25	0.22	0.19
604	chr01_57028670	0.88	0.12	0.12	0.22	0.25	0.22	0.19
605	chr01_57032658	0.91	0.09	0.09	0.16	0.18	0.16	0.15
606	chr01_57787460	0.94	0.06	0.06	0.11	0.11	0.11	0.1
607	chr01_58478373	0.81	0.19	0.19	0.3	0.32	0.3	0.26
608	chr01_58521473	0.67	0.33	0.33	0.44	0.63	0.44	0.34
609	chr01_58626371	0.87	0.13	0.13	0.22	0.25	0.22	0.2
610	chr01_58629576	0.99	0.01	0.01	0.02	0.02	0.02	0.02
611	chr01_58637025	0.71	0.29	0.29	0.41	0.58	0.41	0.33
612	chr01_58675960	0.92	0.08	0.08	0.14	0.15	0.14	0.13
613	chr01_58676145	0.87	0.13	0.13	0.22	0.25	0.22	0.2
614	chr01_58782972	0.61	0.39	0.39	0.48	0.77	0.48	0.36
615	chr01_58799988	0.71	0.29	0.29	0.41	0.58	0.41	0.33
616	chr01_58883191	0.91	0.09	0.09	0.17	0.19	0.17	0.15
617	chr01_58883454	0.8	0.2	0.2	0.32	0.41	0.32	0.27
618	chr01_58930982	0.88	0.12	0.12	0.21	0.24	0.21	0.19
619	chr01_58966007	0.93	0.07	0.07	0.13	0.14	0.13	0.12
620	chr01_58967659	0.63	0.37	0.37	0.47	0.73	0.47	0.36
621	chr01_58973578	0.81	0.19	0.19	0.31	0.38	0.31	0.26
622	chr01_59035187	0.9	0.1	0.1	0.18	0.2	0.18	0.16
623	chr01_59136353	0.59	0.41	0.41	0.48	0.67	0.48	0.37
624	chr01_59138436	0.93	0.07	0.07	0.13	0.14	0.13	0.13
625	chr01_59327983	0.87	0.13	0.13	0.22	0.25	0.22	0.2
626	chr01_59347966	0.78	0.22	0.22	0.35	0.45	0.35	0.29
627	chr01_59359190	0.74	0.26	0.26	0.39	0.53	0.39	0.31
628	chr01_59367093	0.19	0.81	0.19	0.3	0.37	0.3	0.26
629	chr01_59367548	0.58	0.42	0.42	0.49	0.74	0.49	0.37
630	chr01_59367991	0.9	0.1	0.1	0.18	0.2	0.18	0.17
631	chr01_59369202	0.54	0.46	0.46	0.5	0.85	0.5	0.37
632	chr01_59405696	0.7	0.3	0.3	0.42	0.59	0.42	0.33
633	chr01_59463670	0.64	0.36	0.36	0.46	0.71	0.46	0.35
634	chr01_59476799	0.89	0.11	0.11	0.19	0.21	0.19	0.17
635	chr01_59522361	0.45	0.55	0.45	0.49	0.8	0.49	0.37
636	chr01_59531084	0.69	0.31	0.31	0.43	0.61	0.43	0.34
637	chr01_59534397	0.94	0.06	0.06	0.12	0.12	0.12	0.11
638	chr01_59627929	0.88	0.12	0.12	0.22	0.25	0.22	0.19
639	chr01_59670526	0.64	0.36	0.36	0.46	0.69	0.46	0.35
640	chr01_59691964	0.67	0.33	0.33	0.44	0.6	0.44	0.34
641	chr01_59793887	0.79	0.21	0.21	0.34	0.43	0.34	0.28
642	chr01_59840795	0.25	0.75	0.25	0.37	0.47	0.37	0.3
643	chr01_59849804	0.67	0.33	0.33	0.44	0.66	0.44	0.35
644	chr01_59851072	0.86	0.14	0.14	0.24	0.28	0.24	0.21
645	chr01_59891820	0.85	0.15	0.15	0.26	0.3	0.26	0.22
646	chr01_59910389	0.87	0.13	0.13	0.22	0.25	0.22	0.2
647	chr01_59929870	0.98	0.02	0.02	0.04	0.04	0.04	0.04
648	chr01_60061599	0.99	0.01	0.01	0.02	0.02	0.02	0.02
649	chr01_60100305	0.59	0.41	0.41	0.48	0.55	0.48	0.37
650	chr01_60208012	0.87	0.13	0.13	0.22	0.22	0.22	0.2
651	chr01_60211161	0.85	0.15	0.15	0.26	0.3	0.26	0.22
652	chr01_60314382	0.9	0.1	0.1	0.19	0.21	0.19	0.17
653	chr01_60332764	0.91	0.09	0.09	0.16	0.17	0.16	0.15
654	chr01_60335987	0.38	0.62	0.38	0.47	0.74	0.47	0.36
655	chr01_60371988	0.73	0.27	0.27	0.4	0.54	0.4	0.32
656	chr01_60377775	0.47	0.53	0.47	0.5	0.79	0.5	0.37
657	chr01_60463391	0.55	0.45	0.45	0.49	0.82	0.49	0.37
658	chr01_60478398	0.17	0.83	0.17	0.29	0.35	0.29	0.25
659	chr01_60515102	0.98	0.02	0.02	0.04	0.04	0.04	0.04
660	chr01_60535261	0.82	0.18	0.18	0.3	0.36	0.3	0.26
661	chr01_60575308	0.55	0.45	0.45	0.49	0.86	0.49	0.37
662	chr01_60575982	0.34	0.66	0.34	0.45	0.62	0.45	0.35
663	chr01_60594399	0.99	0.01	0.01	0.02	0.02	0.02	0.02
664	chr01_60615725	0.88	0.12	0.12	0.21	0.24	0.21	0.19
665	chr01_60618520	0.89	0.11	0.11	0.19	0.22	0.19	0.17
666	chr01_60809477	0.87	0.13	0.13	0.23	0.26	0.23	0.2
667	chr01_60882393	0.82	0.18	0.18	0.3	0.36	0.3	0.25
668	chr01_60889600	0.51	0.49	0.49	0.5	0.88	0.5	0.37
669	chr01_60966811	0.79	0.21	0.21	0.33	0.42	0.33	0.28
670	chr01_60987364	0.95	0.05	0.05	0.09	0.1	0.09	0.09
671	chr01_60989413	0.72	0.28	0.28	0.41	0.54	0.41	0.32
672	chr01_60989983	0.76	0.24	0.24	0.36	0.47	0.36	0.3
673	chr01_60990012	0.91	0.09	0.09	0.16	0.18	0.16	0.15
674	chr01_60990141	0.88	0.12	0.12	0.21	0.23	0.21	0.19
675	chr01_60990156	0.49	0.51	0.49	0.5	0.97	0.5	0.37
676	chr01_61021540	0.97	0.03	0.03	0.05	0.05	0.05	0.05
677	chr01_61023187	0.97	0.03	0.03	0.05	0.05	0.05	0.05
678	chr01_61063968	0.89	0.11	0.11	0.2	0.23	0.2	0.18
679	chr01_61092788	0.97	0.03	0.03	0.05	0.05	0.05	0.05
680	chr01_61102921	0.38	0.62	0.38	0.47	0.76	0.47	0.36
681	chr01_61127965	0.83	0.17	0.17	0.28	0.33	0.28	0.24
682	chr01_61466758	0.97	0.03	0.03	0.05	0.05	0.05	0.05
683	chr01_61468806	0.96	0.04	0.04	0.07	0.07	0.07	0.07
684	chr01_61608599	0.72	0.28	0.28	0.4	0.55	0.4	0.32
685	chr01_61611974	0.75	0.25	0.25	0.37	0.49	0.37	0.3
686	chr01_61831188	0.88	0.12	0.12	0.21	0.24	0.21	0.19
687	chr01_61848753	0.94	0.06	0.06	0.11	0.12	0.11	0.1
688	chr01_61853240	0.65	0.35	0.35	0.46	0.66	0.46	0.35
689	chr01_61860800	0.97	0.03	0.03	0.05	0.05	0.05	0.05
690	chr01_61883802	0.91	0.09	0.09	0.16	0.18	0.16	0.15
691	chr01_61889600	0.97	0.03	0.03	0.05	0.06	0.05	0.05
692	chr01_61946872	0.59	0.41	0.41	0.48	0.8	0.48	0.37
693	chr01_62041095	0.53	0.47	0.47	0.5	0.86	0.5	0.37
694	chr01_62056358	0.63	0.37	0.37	0.47	0.74	0.47	0.36
695	chr01_62066398	0.08	0.92	0.08	0.14	0.15	0.14	0.13
696	chr01_62077554	0.53	0.47	0.47	0.5	0.83	0.5	0.37
697	chr01_62078394	0.98	0.02	0.02	0.05	0.05	0.05	0.05
698	chr01_62081590	0.94	0.06	0.06	0.11	0.12	0.11	0.1
699	chr01_62156035	0.71	0.29	0.29	0.41	0.57	0.41	0.32
700	chr01_62160429	0.74	0.26	0.26	0.38	0.52	0.38	0.31
701	chr01_62165127	0.63	0.37	0.37	0.47	0.73	0.47	0.36
702	chr01_62219719	0.95	0.05	0.05	0.09	0.09	0.09	0.08
703	chr01_62227974	0.62	0.38	0.38	0.47	0.7	0.47	0.36
704	chr01_62365592	0.73	0.27	0.27	0.4	0.55	0.4	0.32
705	chr01_62501577	0.71	0.29	0.29	0.41	0.58	0.41	0.33
706	chr01_62504408	0.52	0.48	0.48	0.5	0.89	0.5	0.37
707	chr01_62504501	0.63	0.37	0.37	0.47	0.74	0.47	0.36
708	chr01_62507478	0.87	0.13	0.13	0.23	0.26	0.23	0.2
709	chr01_62520797	0.98	0.02	0.02	0.04	0.04	0.04	0.04
710	chr01_62546247	0.59	0.41	0.41	0.49	0.75	0.49	0.37
711	chr01_62551405	0.64	0.36	0.36	0.46	0.71	0.46	0.35
712	chr01_62567109	0.7	0.3	0.3	0.42	0.55	0.42	0.33
713	chr01_62568795	0.94	0.06	0.06	0.11	0.11	0.11	0.1
714	chr01_62583440	0.76	0.24	0.24	0.37	0.48	0.37	0.3
715	chr01_62583473	0.75	0.25	0.25	0.37	0.49	0.37	0.3
716	chr01_62618317	0.64	0.36	0.36	0.46	0.71	0.46	0.35
717	chr01_62709330	0.52	0.48	0.48	0.5	0.83	0.5	0.37
718	chr01_62718288	0.84	0.16	0.16	0.27	0.31	0.27	0.24
719	chr01_62789597	0.28	0.72	0.28	0.4	0.55	0.4	0.32
720	chr01_62802539	0.55	0.45	0.45	0.49	0.85	0.49	0.37
721	chr01_62803048	0.69	0.31	0.31	0.43	0.61	0.43	0.34
722	chr01_62803049	0.72	0.28	0.28	0.4	0.56	0.4	0.32
723	chr01_62803114	0.97	0.03	0.03	0.06	0.06	0.06	0.06
724	chr01_62807554	0.72	0.28	0.28	0.41	0.56	0.41	0.32
725	chr01_62844026	0.82	0.18	0.18	0.29	0.35	0.29	0.25
726	chr01_62844045	0.54	0.46	0.46	0.5	0.85	0.5	0.37
727	chr01_62852691	0.92	0.08	0.08	0.14	0.15	0.14	0.13
728	chr01_62853255	0.72	0.28	0.28	0.4	0.56	0.4	0.32
729	chr01_62853267	0.59	0.41	0.41	0.48	0.78	0.48	0.37
730	chr01_62854689	0.99	0.01	0.01	0.02	0.02	0.02	0.02
731	chr01_62862400	0.88	0.12	0.12	0.22	0.25	0.22	0.19
732	chr01_62873940	0.4	0.6	0.4	0.48	0.79	0.48	0.36
733	chr01_62873951	0.71	0.29	0.29	0.41	0.58	0.41	0.33
734	chr01_62874015	0.4	0.6	0.4	0.48	0.79	0.48	0.36
735	chr01_62880192	0.99	0.01	0.01	0.02	0.02	0.02	0.02
736	chr01_62881597	0.61	0.39	0.39	0.48	0.78	0.48	0.36
737	chr01_62882946	0.57	0.43	0.43	0.49	0.85	0.49	0.37
738	chr01_62900290	0.61	0.39	0.39	0.47	0.76	0.47	0.36
739	chr01_62902378	0.57	0.43	0.43	0.49	0.86	0.49	0.37
740	chr01_63029308	0.97	0.03	0.03	0.06	0.06	0.06	0.05
741	chr01_63052751	0.73	0.27	0.27	0.4	0.54	0.4	0.32
742	chr01_63101594	0.18	0.82	0.18	0.29	0.36	0.29	0.25
743	chr01_63102396	0.57	0.43	0.43	0.49	0.83	0.49	0.37
744	chr01_63102953	0.89	0.11	0.11	0.2	0.22	0.2	0.18
745	chr01_63271681	0.94	0.06	0.06	0.11	0.12	0.11	0.1
746	chr01_63294784	0.6	0.4	0.4	0.48	0.81	0.48	0.37
747	chr01_63295423	0.84	0.16	0.16	0.27	0.33	0.27	0.24
748	chr01_63295742	0.97	0.03	0.03	0.06	0.06	0.06	0.06
749	chr01_63295950	0.7	0.3	0.3	0.42	0.6	0.42	0.33
750	chr01_63365709	0.71	0.29	0.29	0.42	0.59	0.42	0.33
751	chr01_63507175	0.75	0.25	0.25	0.38	0.5	0.38	0.3
752	chr01_63512800	0.94	0.06	0.06	0.12	0.13	0.12	0.11
753	chr01_63550791	0.46	0.54	0.46	0.5	0.85	0.5	0.37
754	chr01_63551211	0.57	0.43	0.43	0.49	0.84	0.49	0.37
755	chr01_63554342	0.93	0.07	0.07	0.13	0.14	0.13	0.12
756	chr01_63556750	0.52	0.48	0.48	0.5	0.82	0.5	0.37
757	chr01_63632789	0.78	0.22	0.22	0.35	0.43	0.35	0.29
758	chr01_63687206	0.57	0.43	0.43	0.49	0.85	0.49	0.37
759	chr01_63690435	0.65	0.35	0.35	0.46	0.7	0.46	0.35
760	chr01_63695674	0.27	0.73	0.27	0.39	0.53	0.39	0.32
761	chr01_63696345	0.65	0.35	0.35	0.46	0.7	0.46	0.35
762	chr01_63700754	0.96	0.04	0.04	0.08	0.08	0.08	0.08
763	chr01_63714332	0.97	0.03	0.03	0.05	0.05	0.05	0.05
764	chr01_63791190	0.66	0.34	0.34	0.45	0.63	0.45	0.35
765	chr01_63795993	0.96	0.04	0.04	0.08	0.08	0.08	0.08
766	chr01_63806397	0.77	0.23	0.23	0.35	0.46	0.35	0.29
767	chr01_63814398	0.7	0.3	0.3	0.42	0.58	0.42	0.33
768	chr01_63863949	0.03	0.97	0.03	0.05	0.06	0.05	0.05
769	chr01_63978739	0.43	0.57	0.43	0.49	0.79	0.49	0.37
770	chr01_63981597	0.97	0.03	0.03	0.06	0.07	0.06	0.06
771	chr01_64045596	0.72	0.28	0.28	0.41	0.57	0.41	0.32
772	chr01_64076664	0.72	0.28	0.28	0.4	0.56	0.4	0.32
773	chr01_64135353	0.65	0.35	0.35	0.46	0.7	0.46	0.35
774	chr01_64140771	0.65	0.35	0.35	0.45	0.68	0.45	0.35
775	chr01_64144659	0.89	0.11	0.11	0.19	0.22	0.19	0.18
776	chr01_64146930	0.53	0.47	0.47	0.5	0.84	0.5	0.37
777	chr01_64151996	0.71	0.29	0.29	0.41	0.58	0.41	0.33
778	chr01_64164582	0.88	0.12	0.12	0.21	0.24	0.21	0.19
779	chr01_64177480	0.1	0.9	0.1	0.18	0.2	0.18	0.16
780	chr01_64182066	0.53	0.47	0.47	0.5	0.83	0.5	0.37
781	chr01_64187162	0.7	0.3	0.3	0.42	0.6	0.42	0.33
782	chr01_64255621	0.7	0.3	0.3	0.42	0.61	0.42	0.33
783	chr01_64268776	0.7	0.3	0.3	0.42	0.6	0.42	0.33
784	chr01_64271971	0.72	0.28	0.28	0.4	0.56	0.4	0.32
785	chr01_64275269	0.66	0.34	0.34	0.45	0.69	0.45	0.35
786	chr01_64278383	0.52	0.48	0.48	0.5	0.8	0.5	0.37
787	chr01_64301861	0.43	0.57	0.43	0.49	0.86	0.49	0.37
788	chr01_64323894	0.64	0.36	0.36	0.46	0.71	0.46	0.35
789	chr01_64327699	0.52	0.48	0.48	0.5	0.87	0.5	0.37
790	chr01_64339996	0.73	0.27	0.27	0.39	0.53	0.39	0.31
791	chr01_64343180	0.98	0.02	0.02	0.04	0.04	0.04	0.04
792	chr01_64383212	0.72	0.28	0.28	0.4	0.56	0.4	0.32
793	chr01_64389024	0.94	0.06	0.06	0.12	0.13	0.12	0.11
794	chr01_64391153	0.93	0.07	0.07	0.13	0.14	0.13	0.12
795	chr01_64391832	0.54	0.46	0.46	0.5	0.85	0.5	0.37
796	chr01_64397564	0.93	0.07	0.07	0.13	0.14	0.13	0.12
797	chr01_64463239	0.75	0.25	0.25	0.38	0.5	0.38	0.31
798	chr01_64463293	0.46	0.54	0.46	0.5	0.79	0.5	0.37
799	chr01_64463776	0.74	0.26	0.26	0.38	0.52	0.38	0.31
800	chr01_64468279	0.75	0.25	0.25	0.38	0.5	0.38	0.3
801	chr01_64478765	0.98	0.02	0.02	0.03	0.03	0.03	0.03
802	chr01_64481592	0.75	0.25	0.25	0.37	0.5	0.37	0.3
803	chr01_64499372	0.99	0.01	0.01	0.02	0.02	0.02	0.02
804	chr01_64499472	0.26	0.74	0.26	0.38	0.52	0.38	0.31
805	chr01_64499526	0.96	0.04	0.04	0.08	0.08	0.08	0.08
806	chr01_64503554	0.46	0.54	0.46	0.5	0.88	0.5	0.37
807	chr01_64504340	0.74	0.26	0.26	0.39	0.52	0.39	0.31
808	chr01_64507183	0.42	0.58	0.42	0.49	0.8	0.49	0.37
809	chr01_64571992	0.71	0.29	0.29	0.42	0.59	0.42	0.33
810	chr01_64588775	0.73	0.27	0.27	0.4	0.54	0.4	0.32
811	chr01_64608306	0.84	0.16	0.16	0.27	0.33	0.27	0.24
812	chr01_64608328	0.46	0.54	0.46	0.5	0.87	0.5	0.37
813	chr01_64687983	0.96	0.04	0.04	0.09	0.09	0.09	0.08
814	chr01_64688780	0.79	0.21	0.21	0.33	0.41	0.33	0.28
815	chr01_64757721	0.5	0.5	0.5	0.5	0.84	0.5	0.37
816	chr01_64765599	0.85	0.15	0.15	0.25	0.29	0.25	0.22
817	chr01_64770386	0.67	0.33	0.33	0.44	0.65	0.44	0.34
818	chr01_64775153	0.57	0.43	0.43	0.49	0.82	0.49	0.37
819	chr01_64818003	0.43	0.57	0.43	0.49	0.8	0.49	0.37
820	chr01_64863174	0.82	0.18	0.18	0.3	0.36	0.3	0.25
821	chr01_64885263	0.73	0.27	0.27	0.39	0.53	0.39	0.31
822	chr01_64920506	0.91	0.09	0.09	0.16	0.18	0.16	0.15
823	chr01_64920825	0.96	0.04	0.04	0.08	0.08	0.08	0.08
824	chr01_64969742	0.54	0.46	0.46	0.5	0.9	0.5	0.37
825	chr01_64983303	0.92	0.08	0.08	0.14	0.15	0.14	0.13
826	chr01_64993552	0.93	0.07	0.07	0.13	0.14	0.13	0.12
827	chr01_64998828	0.98	0.02	0.02	0.03	0.03	0.03	0.03
828	chr01_65026635	0.96	0.04	0.04	0.09	0.09	0.09	0.08
829	chr01_65026998	0.7	0.3	0.3	0.42	0.6	0.42	0.33
830	chr01_65046206	0.48	0.52	0.48	0.5	0.88	0.5	0.37
831	chr01_65182392	0.36	0.64	0.36	0.46	0.71	0.46	0.35
832	chr01_65219684	0.68	0.32	0.32	0.44	0.65	0.44	0.34
833	chr01_65219933	0.89	0.11	0.11	0.2	0.23	0.2	0.18
834	chr01_65220213	0.55	0.45	0.45	0.5	0.88	0.5	0.37
835	chr01_65248797	0.72	0.28	0.28	0.41	0.52	0.41	0.32
836	chr01_65292784	0.97	0.03	0.03	0.06	0.06	0.06	0.06
837	chr01_65294282	0.51	0.49	0.49	0.5	0.97	0.5	0.37
838	chr01_65294397	0.94	0.06	0.06	0.12	0.13	0.12	0.11
839	chr01_65294409	0.61	0.39	0.39	0.48	0.79	0.48	0.36
840	chr01_65302284	0.67	0.33	0.33	0.44	0.66	0.44	0.34
841	chr01_65334529	0.72	0.28	0.28	0.41	0.56	0.41	0.32
842	chr01_65352795	0.69	0.31	0.31	0.43	0.61	0.43	0.34
843	chr01_65368178	0.98	0.02	0.02	0.04	0.04	0.04	0.04
844	chr01_65373595	0.52	0.48	0.48	0.5	0.86	0.5	0.37
845	chr01_65377598	0.37	0.63	0.37	0.47	0.72	0.47	0.36
846	chr01_65423184	0.6	0.4	0.4	0.48	0.72	0.48	0.37
847	chr01_65424653	0.97	0.03	0.03	0.06	0.06	0.06	0.05
848	chr01_65519111	0.64	0.36	0.36	0.46	0.69	0.46	0.35
849	chr01_65548794	0.19	0.81	0.19	0.31	0.39	0.31	0.26
850	chr01_65576691	0.91	0.09	0.09	0.16	0.17	0.16	0.14
851	chr01_65601212	0.52	0.48	0.48	0.5	0.85	0.5	0.37
852	chr01_65606385	0.5	0.5	0.5	0.5	1	0.5	0.37
853	chr01_65606542	0.52	0.48	0.48	0.5	0.97	0.5	0.37
854	chr01_65626956	0.64	0.36	0.36	0.46	0.72	0.46	0.35
855	chr01_65626965	0.65	0.35	0.35	0.46	0.7	0.46	0.35
856	chr01_65627093	0.69	0.31	0.31	0.43	0.62	0.43	0.34
857	chr01_65627547	0.66	0.34	0.34	0.45	0.65	0.45	0.35
858	chr01_65721567	0.97	0.03	0.03	0.06	0.05	0.06	0.06
859	chr01_65723673	0.67	0.33	0.33	0.44	0.63	0.44	0.34
860	chr01_65724780	0.58	0.42	0.42	0.49	0.73	0.49	0.37
861	chr01_65741592	0.92	0.08	0.08	0.15	0.16	0.15	0.13
862	chr01_65751996	0.59	0.41	0.41	0.48	0.73	0.48	0.37
863	chr01_65753846	0.56	0.44	0.44	0.49	0.73	0.49	0.37
864	chr01_65803195	0.62	0.38	0.38	0.47	0.7	0.47	0.36
865	chr01_65806926	0.96	0.04	0.04	0.07	0.07	0.07	0.07
866	chr01_65819186	0.92	0.08	0.08	0.14	0.16	0.14	0.13
867	chr01_65821573	0.59	0.41	0.41	0.49	0.8	0.49	0.37
868	chr01_65828797	0.67	0.33	0.33	0.45	0.6	0.45	0.35
869	chr01_65842339	0.46	0.54	0.46	0.5	0.65	0.5	0.37
870	chr01_65845596	0.73	0.27	0.27	0.39	0.53	0.39	0.32
871	chr01_65852614	0.65	0.35	0.35	0.45	0.66	0.45	0.35
872	chr01_65855154	0.73	0.27	0.27	0.39	0.52	0.39	0.31
873	chr01_65869302	0.76	0.24	0.24	0.37	0.48	0.37	0.3
874	chr01_66001588	0.6	0.4	0.4	0.48	0.75	0.48	0.37
875	chr01_66012790	0.86	0.14	0.14	0.25	0.29	0.25	0.22
876	chr01_66015192	0.96	0.04	0.04	0.07	0.07	0.07	0.07
877	chr01_66087171	0.37	0.63	0.37	0.47	0.72	0.47	0.36
878	chr01_66099873	0.54	0.46	0.46	0.5	0.71	0.5	0.37
879	chr01_66103304	0.47	0.53	0.47	0.5	0.87	0.5	0.37
880	chr01_66107999	0.68	0.32	0.32	0.43	0.63	0.43	0.34
881	chr01_66158011	0.96	0.04	0.04	0.08	0.08	0.08	0.07
882	chr01_66159413	0.69	0.31	0.31	0.43	0.63	0.43	0.34
883	chr01_66205595	0.86	0.14	0.14	0.25	0.29	0.25	0.22
884	chr01_66212765	0.74	0.26	0.26	0.39	0.51	0.39	0.31
885	chr01_66270328	0.93	0.07	0.07	0.13	0.14	0.13	0.13
886	chr01_66274363	0.69	0.31	0.31	0.43	0.57	0.43	0.34
887	chr01_66298485	0.77	0.23	0.23	0.35	0.45	0.35	0.29
888	chr01_66334311	0.61	0.39	0.39	0.47	0.76	0.47	0.36
889	chr01_66406388	0.5	0.5	0.5	0.5	0.57	0.5	0.38
890	chr01_66431858	0.68	0.32	0.32	0.43	0.64	0.43	0.34
891	chr01_66432455	0.38	0.62	0.38	0.47	0.74	0.47	0.36
892	chr01_66438352	0.69	0.31	0.31	0.43	0.63	0.43	0.34
893	chr01_66473271	0.93	0.07	0.07	0.14	0.15	0.14	0.13
894	chr01_66475186	0.97	0.03	0.03	0.06	0.06	0.06	0.06
895	chr01_66483968	0.82	0.18	0.18	0.3	0.36	0.3	0.25
896	chr01_66492390	0.88	0.12	0.12	0.21	0.24	0.21	0.19
897	chr01_66494350	0.44	0.56	0.44	0.49	0.84	0.49	0.37
898	chr01_66508751	0.76	0.24	0.24	0.36	0.47	0.36	0.3
899	chr01_66517596	0.93	0.07	0.07	0.12	0.13	0.12	0.12
900	chr01_66564795	0.93	0.07	0.07	0.12	0.12	0.12	0.12
901	chr01_66575988	0.75	0.25	0.25	0.38	0.5	0.38	0.31
902	chr01_66607196	0.89	0.11	0.11	0.19	0.22	0.19	0.17
903	chr01_66642637	0.54	0.46	0.46	0.5	0.85	0.5	0.37
904	chr01_66647546	0.49	0.51	0.49	0.5	0.89	0.5	0.37
905	chr01_66739445	0.88	0.12	0.12	0.21	0.23	0.21	0.18
906	chr01_66749595	0.64	0.36	0.36	0.46	0.71	0.46	0.35
907	chr01_66752649	0.55	0.45	0.45	0.5	0.82	0.5	0.37
908	chr01_66757577	0.96	0.04	0.04	0.08	0.08	0.08	0.08
909	chr01_66784794	0.93	0.07	0.07	0.13	0.14	0.13	0.12
910	chr01_66789595	0.99	0.01	0.01	0.02	0.02	0.02	0.02
911	chr01_66849588	0.96	0.04	0.04	0.07	0.07	0.07	0.07
912	chr01_66863191	0.44	0.56	0.44	0.49	0.84	0.49	0.37
913	chr01_66903993	0.84	0.16	0.16	0.26	0.29	0.26	0.23
914	chr01_66912837	0.58	0.42	0.42	0.49	0.81	0.49	0.37
915	chr01_66912864	0.32	0.68	0.32	0.43	0.63	0.43	0.34
916	chr01_66937947	0.97	0.03	0.03	0.06	0.06	0.06	0.06
917	chr01_66948577	0.85	0.15	0.15	0.25	0.29	0.25	0.22
918	chr01_66948976	0.74	0.26	0.26	0.39	0.49	0.39	0.31
919	chr01_66950728	0.4	0.6	0.4	0.48	0.8	0.48	0.36
920	chr01_66956796	0.96	0.04	0.04	0.07	0.07	0.07	0.07
921	chr01_66991986	0.64	0.36	0.36	0.46	0.71	0.46	0.35
922	chr01_67024122	0.7	0.3	0.3	0.42	0.58	0.42	0.33
923	chr01_67049566	0.98	0.02	0.02	0.05	0.05	0.05	0.05
924	chr01_67056797	0.84	0.16	0.16	0.28	0.33	0.28	0.24
925	chr01_67062397	0.96	0.04	0.04	0.08	0.08	0.08	0.07
926	chr01_67087996	0.87	0.13	0.13	0.23	0.26	0.23	0.2
927	chr01_67116716	0.65	0.35	0.35	0.46	0.62	0.46	0.35
928	chr01_67130331	0.96	0.04	0.04	0.07	0.08	0.07	0.07
929	chr01_67161667	0.86	0.14	0.14	0.24	0.28	0.24	0.21
930	chr01_67162120	0.27	0.73	0.27	0.39	0.54	0.39	0.32
931	chr01_67162471	0.89	0.11	0.11	0.19	0.21	0.19	0.17
932	chr01_67165913	0.92	0.08	0.08	0.14	0.15	0.14	0.13
933	chr01_67167809	0.97	0.03	0.03	0.06	0.06	0.06	0.06
934	chr01_67168193	0.61	0.39	0.39	0.48	0.77	0.48	0.36
935	chr01_67168240	0.61	0.39	0.39	0.48	0.78	0.48	0.36
936	chr01_67182947	0.15	0.85	0.15	0.25	0.3	0.25	0.22
937	chr01_67184716	0.87	0.13	0.13	0.22	0.25	0.22	0.2
938	chr01_67186356	0.56	0.44	0.44	0.49	0.82	0.49	0.37
939	chr01_67208804	0.86	0.14	0.14	0.24	0.27	0.24	0.21
940	chr01_67208902	0.86	0.14	0.14	0.24	0.28	0.24	0.21
941	chr01_67208938	0.13	0.87	0.13	0.23	0.27	0.23	0.21
942	chr01_67223835	0.57	0.43	0.43	0.49	0.85	0.49	0.37
943	chr01_67243899	0.96	0.04	0.04	0.07	0.07	0.07	0.07
944	chr01_67245941	0.61	0.39	0.39	0.48	0.77	0.48	0.36
945	chr01_67248400	0.55	0.45	0.45	0.5	0.86	0.5	0.37
946	chr01_67248949	0.66	0.34	0.34	0.45	0.68	0.45	0.35
947	chr01_67249152	0.55	0.45	0.45	0.49	0.89	0.49	0.37
948	chr01_67271367	0.34	0.66	0.34	0.45	0.67	0.45	0.35
949	chr01_67272132	0.51	0.49	0.49	0.5	0.67	0.5	0.37
950	chr01_67359930	0.96	0.04	0.04	0.07	0.07	0.07	0.07
951	chr01_67362388	0.67	0.33	0.33	0.44	0.62	0.44	0.35
952	chr01_67386376	0.94	0.06	0.06	0.11	0.12	0.11	0.11
953	chr01_67394583	0.78	0.22	0.22	0.34	0.43	0.34	0.28
954	chr01_67395993	0.95	0.05	0.05	0.09	0.09	0.09	0.08
955	chr01_67420777	0.68	0.32	0.32	0.43	0.63	0.43	0.34
956	chr01_67459347	0.58	0.42	0.42	0.49	0.83	0.49	0.37
957	chr01_67470652	0.8	0.2	0.2	0.32	0.41	0.32	0.27
958	chr01_67474435	0.93	0.07	0.07	0.13	0.14	0.13	0.12
959	chr01_67485940	0.74	0.26	0.26	0.38	0.46	0.38	0.31
960	chr01_67495996	0.84	0.16	0.16	0.27	0.32	0.27	0.23
961	chr01_67517588	0.46	0.54	0.46	0.5	0.8	0.5	0.37
962	chr01_67530397	0.45	0.55	0.45	0.49	0.87	0.49	0.37
963	chr01_67534006	0.61	0.39	0.39	0.48	0.72	0.48	0.36
964	chr01_67552198	0.61	0.39	0.39	0.48	0.77	0.48	0.36
965	chr01_67561590	0.87	0.13	0.13	0.23	0.26	0.23	0.2
966	chr01_67562394	0.92	0.08	0.08	0.15	0.17	0.15	0.14
967	chr01_67586121	0.61	0.39	0.39	0.47	0.77	0.47	0.36
968	chr01_67614060	0.82	0.18	0.18	0.29	0.36	0.29	0.25
969	chr01_67621314	0.63	0.37	0.37	0.47	0.67	0.47	0.36
970	chr01_67637445	0.52	0.48	0.48	0.5	0.86	0.5	0.37
971	chr01_67653820	0.73	0.27	0.27	0.4	0.43	0.4	0.32
972	chr01_67669572	0.95	0.05	0.05	0.09	0.09	0.09	0.08
973	chr01_67672124	0.92	0.08	0.08	0.14	0.15	0.14	0.13
974	chr01_67730513	0.57	0.43	0.43	0.49	0.83	0.49	0.37
975	chr01_67731967	0.71	0.29	0.29	0.41	0.58	0.41	0.33
976	chr01_67743266	0.69	0.31	0.31	0.43	0.62	0.43	0.34
977	chr01_67748006	0.76	0.24	0.24	0.36	0.47	0.36	0.3
978	chr01_67748411	0.97	0.03	0.03	0.07	0.07	0.07	0.06
979	chr01_67749899	0.88	0.12	0.12	0.21	0.24	0.21	0.19
980	chr01_67752661	0.61	0.39	0.39	0.48	0.76	0.48	0.36
981	chr01_67767290	0.62	0.38	0.38	0.47	0.7	0.47	0.36
982	chr01_67769198	0.61	0.39	0.39	0.48	0.76	0.48	0.36
983	chr01_67819581	0.72	0.28	0.28	0.41	0.56	0.41	0.32
984	chr01_67819999	0.79	0.21	0.21	0.33	0.42	0.33	0.28
985	chr01_67822795	0.93	0.07	0.07	0.13	0.14	0.13	0.13
986	chr01_67822886	0.62	0.38	0.38	0.47	0.73	0.47	0.36
987	chr01_67822946	0.73	0.27	0.27	0.4	0.53	0.4	0.32
988	chr01_67825412	0.43	0.57	0.43	0.49	0.78	0.49	0.37
989	chr01_67863851	0.8	0.2	0.2	0.32	0.41	0.32	0.27
990	chr01_67917916	0.57	0.43	0.43	0.49	0.78	0.49	0.37
991	chr01_67918004	0.82	0.18	0.18	0.3	0.37	0.3	0.25
992	chr01_67921505	0.49	0.51	0.49	0.5	0.89	0.5	0.37
993	chr01_67929291	0.55	0.45	0.45	0.49	0.85	0.49	0.37
994	chr01_67930475	0.94	0.06	0.06	0.11	0.12	0.11	0.1
995	chr01_67931889	0.74	0.26	0.26	0.39	0.53	0.39	0.31
996	chr01_67971977	0.81	0.19	0.19	0.3	0.37	0.3	0.26
997	chr01_67972786	0.4	0.6	0.4	0.48	0.76	0.48	0.36
998	chr01_67984467	0.57	0.43	0.43	0.49	0.84	0.49	0.37
999	chr01_68075250	0.55	0.45	0.45	0.5	0.83	0.5	0.37
1000	chr01_68253052	0.59	0.41	0.41	0.49	0.77	0.49	0.37
1001	chr01_68257012	0.59	0.41	0.41	0.48	0.77	0.48	0.37
1002	chr01_68283160	0.59	0.41	0.41	0.48	0.78	0.48	0.37
1003	chr01_68291136	0.46	0.54	0.46	0.5	0.87	0.5	0.37
1004	chr01_68291439	0.44	0.56	0.44	0.49	0.61	0.49	0.37
1005	chr01_68292876	0.56	0.44	0.44	0.49	0.85	0.49	0.37
1006	chr01_68296616	0.77	0.23	0.23	0.35	0.46	0.35	0.29
1007	chr01_68299142	0.51	0.49	0.49	0.5	0.84	0.5	0.37
1008	chr01_68299543	0.4	0.6	0.4	0.48	0.55	0.48	0.36
1009	chr01_68349588	0.26	0.74	0.26	0.38	0.51	0.38	0.31
1010	chr01_68360259	0.95	0.05	0.05	0.09	0.09	0.09	0.09
1011	chr01_68363625	0.65	0.35	0.35	0.46	0.7	0.46	0.35
1012	chr01_68411989	0.94	0.06	0.06	0.11	0.12	0.11	0.11
1013	chr01_68429599	0.94	0.06	0.06	0.11	0.11	0.11	0.1
1014	chr01_68475561	0.96	0.04	0.04	0.07	0.07	0.07	0.07
1015	chr01_68475775	0.72	0.28	0.28	0.4	0.56	0.4	0.32
1016	chr01_68549294	0.39	0.61	0.39	0.48	0.73	0.48	0.36
1017	chr01_68549705	0.5	0.5	0.5	0.5	1	0.5	0.38
1018	chr01_68549929	0.82	0.18	0.18	0.29	0.36	0.29	0.25
1019	chr01_68562113	0.54	0.46	0.46	0.5	0.87	0.5	0.37
1020	chr01_68569507	0.7	0.3	0.3	0.42	0.59	0.42	0.33
1021	chr01_68570567	0.93	0.07	0.07	0.14	0.15	0.14	0.13
1022	chr01_68571449	0.6	0.4	0.4	0.48	0.78	0.48	0.36
1023	chr01_68596770	0.98	0.02	0.02	0.04	0.05	0.04	0.04
1024	chr01_68611179	0.22	0.78	0.22	0.34	0.44	0.34	0.29
1025	chr01_68628696	0.49	0.51	0.49	0.5	0.84	0.5	0.37
1026	chr01_68629623	0.81	0.19	0.19	0.31	0.38	0.31	0.26
1027	chr01_68629838	0.9	0.1	0.1	0.18	0.2	0.18	0.16
1028	chr01_68651187	0.99	0.01	0.01	0.02	0.02	0.02	0.02
1029	chr01_68652798	0.82	0.18	0.18	0.29	0.35	0.29	0.25
1030	chr01_68667189	0.69	0.31	0.31	0.43	0.62	0.43	0.34
1031	chr01_68699193	0.32	0.68	0.32	0.43	0.62	0.43	0.34
1032	chr01_68733080	0.57	0.43	0.43	0.49	0.83	0.49	0.37
1033	chr01_68737586	0.92	0.08	0.08	0.14	0.15	0.14	0.13
1034	chr01_68745131	0.49	0.51	0.49	0.5	0.81	0.5	0.37
1035	chr01_68787995	0.66	0.34	0.34	0.45	0.68	0.45	0.35
1036	chr01_68805288	0.74	0.26	0.26	0.39	0.53	0.39	0.31
1037	chr01_68838380	0.86	0.14	0.14	0.24	0.28	0.24	0.21
1038	chr01_68839590	0.89	0.11	0.11	0.19	0.22	0.19	0.17
1039	chr01_68848343	0.57	0.43	0.43	0.49	0.83	0.49	0.37
1040	chr01_68852783	0.71	0.29	0.29	0.41	0.58	0.41	0.33
1041	chr01_68866055	0.71	0.29	0.29	0.41	0.57	0.41	0.33
1042	chr01_68866799	0.51	0.49	0.49	0.5	0.98	0.5	0.37
1043	chr01_68867511	0.61	0.39	0.39	0.48	0.72	0.48	0.36
1044	chr01_68869053	0.67	0.33	0.33	0.44	0.65	0.44	0.35
1045	chr01_68878583	0.88	0.12	0.12	0.21	0.24	0.21	0.19
1046	chr01_68919105	0.91	0.09	0.09	0.16	0.18	0.16	0.15
1047	chr01_68935188	0.55	0.45	0.45	0.5	0.78	0.5	0.37
1048	chr01_68993600	0.42	0.58	0.42	0.49	0.84	0.49	0.37
1049	chr01_68995686	0.81	0.19	0.19	0.31	0.38	0.31	0.26
1050	chr01_69114694	0.9	0.1	0.1	0.19	0.21	0.19	0.17
1051	chr01_69123996	0.26	0.74	0.26	0.38	0.51	0.38	0.31
1052	chr01_69125589	0.86	0.14	0.14	0.25	0.29	0.25	0.22
1053	chr01_69151882	0.43	0.57	0.43	0.49	0.8	0.49	0.37
1054	chr01_69213561	0.97	0.03	0.03	0.06	0.06	0.06	0.06
1055	chr01_69219161	0.57	0.43	0.43	0.49	0.8	0.49	0.37
1056	chr01_69245287	0.68	0.32	0.32	0.44	0.64	0.44	0.34
1057	chr01_69271189	0.95	0.05	0.05	0.1	0.1	0.1	0.09
1058	chr01_69275036	0.89	0.11	0.11	0.2	0.22	0.2	0.18
1059	chr01_69316794	0.94	0.06	0.06	0.11	0.12	0.11	0.1
1060	chr01_69319980	0.3	0.7	0.3	0.42	0.6	0.42	0.33
1061	chr01_69333593	0.94	0.06	0.06	0.11	0.12	0.11	0.11
1062	chr01_69375969	0.62	0.38	0.38	0.47	0.76	0.47	0.36
1063	chr01_69378369	0.92	0.08	0.08	0.15	0.17	0.15	0.14
1064	chr01_69539263	0.55	0.45	0.45	0.5	0.9	0.5	0.37
1065	chr01_69539477	0.59	0.41	0.41	0.48	0.82	0.48	0.37
1066	chr01_69539957	0.58	0.42	0.42	0.49	0.82	0.49	0.37
1067	chr01_69540143	0.93	0.07	0.07	0.12	0.13	0.12	0.12
1068	chr01_69540181	0.93	0.07	0.07	0.13	0.13	0.13	0.12
1069	chr01_69540203	0.33	0.67	0.33	0.44	0.61	0.44	0.35
1070	chr01_69540230	0.27	0.73	0.27	0.4	0.53	0.4	0.32
1071	chr01_69562392	0.6	0.4	0.4	0.48	0.8	0.48	0.36
1072	chr01_69577842	0.86	0.14	0.14	0.24	0.28	0.24	0.21
1073	chr01_69595978	0.92	0.08	0.08	0.15	0.16	0.15	0.14
1074	chr01_69643019	0.77	0.23	0.23	0.36	0.47	0.36	0.29
1075	chr01_69655900	0.64	0.36	0.36	0.46	0.71	0.46	0.35
1076	chr01_69659173	0.5	0.5	0.5	0.5	0.78	0.5	0.37
1077	chr01_69679181	0.94	0.06	0.06	0.11	0.11	0.11	0.1
1078	chr01_69686390	0.51	0.49	0.49	0.5	0.87	0.5	0.37
1079	chr01_69686405	0.51	0.49	0.49	0.5	0.87	0.5	0.37
1080	chr01_69693401	0.96	0.04	0.04	0.08	0.08	0.08	0.08
1081	chr01_69717598	0.87	0.13	0.13	0.22	0.26	0.22	0.2
1082	chr01_69759935	0.87	0.13	0.13	0.22	0.26	0.22	0.2
1083	chr01_69764000	0.8	0.2	0.2	0.32	0.4	0.32	0.27
1084	chr01_69764456	0.55	0.45	0.45	0.49	0.82	0.49	0.37
1085	chr01_69765542	0.63	0.37	0.37	0.47	0.74	0.47	0.36
1086	chr01_69774570	0.62	0.38	0.38	0.47	0.74	0.47	0.36
1087	chr01_69774610	0.62	0.38	0.38	0.47	0.74	0.47	0.36
1088	chr01_69777490	0.62	0.38	0.38	0.47	0.7	0.47	0.36
1089	chr01_69822385	0.94	0.06	0.06	0.11	0.11	0.11	0.1
1090	chr01_69837572	0.3	0.7	0.3	0.42	0.59	0.42	0.33
1091	chr01_69839131	0.9	0.1	0.1	0.18	0.2	0.18	0.16
1092	chr01_69864720	0.88	0.12	0.12	0.22	0.25	0.22	0.19
1093	chr01_69881583	0.7	0.3	0.3	0.42	0.6	0.42	0.33
1094	chr01_69882330	0.91	0.09	0.09	0.17	0.19	0.17	0.16
1095	chr01_69889979	0.69	0.31	0.31	0.42	0.61	0.42	0.33
1096	chr01_70094473	0.99	0.01	0.01	0.02	0.02	0.02	0.02
1097	chr01_70098301	0.94	0.06	0.06	0.11	0.11	0.11	0.1
1098	chr01_70111603	0.87	0.13	0.13	0.23	0.26	0.23	0.2
1099	chr01_70113468	0.58	0.42	0.42	0.49	0.8	0.49	0.37
1100	chr01_70113946	0.86	0.14	0.14	0.25	0.29	0.25	0.22
1101	chr01_70119974	0.82	0.18	0.18	0.3	0.36	0.3	0.25
1102	chr01_70122367	0.84	0.16	0.16	0.27	0.32	0.27	0.23
1103	chr01_70180974	0.71	0.29	0.29	0.41	0.58	0.41	0.33
1104	chr01_70207146	0.81	0.19	0.19	0.31	0.39	0.31	0.26
1105	chr01_70263280	0.62	0.38	0.38	0.47	0.75	0.47	0.36
1106	chr01_70272773	0.44	0.56	0.44	0.49	0.82	0.49	0.37
1107	chr01_70410975	0.67	0.33	0.33	0.44	0.66	0.44	0.34
1108	chr01_70434397	0.88	0.12	0.12	0.21	0.24	0.21	0.19
1109	chr01_70469471	0.93	0.07	0.07	0.14	0.15	0.14	0.13
1110	chr01_70471588	0.81	0.19	0.19	0.31	0.39	0.31	0.26
1111	chr01_70487993	0.92	0.08	0.08	0.14	0.16	0.14	0.13
1112	chr01_70495916	0.81	0.19	0.19	0.31	0.38	0.31	0.26
1113	chr01_70535992	0.8	0.2	0.2	0.32	0.4	0.32	0.27
1114	chr01_70547981	0.98	0.02	0.02	0.04	0.04	0.04	0.04
1115	chr01_70548475	0.97	0.03	0.03	0.05	0.05	0.05	0.05
1116	chr01_70554331	0.95	0.05	0.05	0.1	0.1	0.1	0.09
1117	chr01_70555970	0.89	0.11	0.11	0.19	0.21	0.19	0.17
1118	chr01_70596774	0.94	0.06	0.06	0.11	0.11	0.11	0.1
1119	chr01_70849984	0.95	0.05	0.05	0.1	0.11	0.1	0.1
1120	chr01_70855807	0.93	0.07	0.07	0.12	0.13	0.12	0.12
1121	chr01_70862368	0.19	0.81	0.19	0.31	0.37	0.31	0.26
1122	chr01_70883948	0.34	0.66	0.34	0.45	0.68	0.45	0.35
1123	chr01_70930398	0.93	0.07	0.07	0.12	0.13	0.12	0.12
1124	chr01_70931592	0.63	0.37	0.37	0.46	0.73	0.46	0.36
1125	chr01_70932779	0.64	0.36	0.36	0.46	0.73	0.46	0.36
1126	chr01_70934366	0.96	0.04	0.04	0.08	0.08	0.08	0.08
1127	chr01_71013700	0.57	0.43	0.43	0.49	0.83	0.49	0.37
1128	chr01_71052741	0.79	0.21	0.21	0.34	0.43	0.34	0.28
1129	chr01_71055972	0.8	0.2	0.2	0.33	0.41	0.33	0.27
1130	chr01_71071536	0.55	0.45	0.45	0.49	0.85	0.49	0.37
1131	chr01_71093911	0.41	0.59	0.41	0.48	0.81	0.48	0.37
1132	chr01_71095437	0.93	0.07	0.07	0.13	0.14	0.13	0.12
1133	chr01_71099959	0.37	0.63	0.37	0.47	0.75	0.47	0.36
1134	chr01_71200746	0.87	0.13	0.13	0.23	0.26	0.23	0.2
1135	chr01_71212428	0.66	0.34	0.34	0.45	0.68	0.45	0.35
1136	chr01_71219200	0.86	0.14	0.14	0.25	0.29	0.25	0.22
1137	chr01_71236776	0.36	0.64	0.36	0.46	0.72	0.46	0.36
1138	chr01_71243947	0.97	0.03	0.03	0.06	0.06	0.06	0.06
1139	chr01_71291859	0.47	0.53	0.47	0.5	0.82	0.5	0.37
1140	chr01_71348797	0.89	0.11	0.11	0.2	0.23	0.2	0.18
1141	chr01_71355999	0.97	0.03	0.03	0.07	0.07	0.07	0.06
1142	chr01_71390778	0.93	0.07	0.07	0.13	0.14	0.13	0.12
1143	chr01_71396783	0.95	0.05	0.05	0.09	0.09	0.09	0.09
1144	chr01_71412790	0.95	0.05	0.05	0.1	0.1	0.1	0.09
1145	chr01_71416070	0.39	0.61	0.39	0.47	0.77	0.47	0.36
1146	chr01_71435578	0.65	0.35	0.35	0.46	0.66	0.46	0.35
1147	chr01_71516041	0.89	0.11	0.11	0.19	0.21	0.19	0.17
1148	chr01_71530931	0.53	0.47	0.47	0.5	0.72	0.5	0.37
1149	chr01_71530961	0.53	0.47	0.47	0.5	0.73	0.5	0.37
1150	chr01_71532789	0.48	0.52	0.48	0.5	0.82	0.5	0.37
1151	chr01_71560862	0.51	0.49	0.49	0.5	0.82	0.5	0.37
1152	chr01_71583147	0.97	0.03	0.03	0.06	0.06	0.06	0.06
1153	chr01_71588172	0.91	0.09	0.09	0.16	0.17	0.16	0.14
1154	chr01_71600325	0.35	0.65	0.35	0.46	0.69	0.46	0.35
1155	chr01_71601531	0.36	0.64	0.36	0.46	0.72	0.46	0.36
1156	chr01_71604202	0.39	0.61	0.39	0.48	0.71	0.48	0.36
1157	chr01_71621531	0.56	0.44	0.44	0.49	0.89	0.49	0.37
1158	chr01_71623187	0.64	0.36	0.36	0.46	0.73	0.46	0.36
1159	chr01_71624217	0.57	0.43	0.43	0.49	0.83	0.49	0.37
1160	chr01_71637216	0.7	0.3	0.3	0.42	0.61	0.42	0.33
1161	chr01_71662917	0.6	0.4	0.4	0.48	0.77	0.48	0.36
1162	chr01_71714544	0.73	0.27	0.27	0.4	0.55	0.4	0.32
1163	chr01_71717501	0.65	0.35	0.35	0.46	0.69	0.46	0.35
1164	chr01_71744610	0.85	0.15	0.15	0.26	0.3	0.26	0.22
1165	chr01_71751985	0.68	0.32	0.32	0.43	0.62	0.43	0.34
1166	chr01_71777511	0.97	0.03	0.03	0.06	0.06	0.06	0.06
1167	chr01_71779949	0.97	0.03	0.03	0.06	0.06	0.06	0.06
1168	chr01_71783102	0.97	0.03	0.03	0.07	0.07	0.07	0.06
1169	chr01_71790931	0.67	0.33	0.33	0.44	0.66	0.44	0.34
1170	chr01_71832110	0.08	0.92	0.08	0.15	0.16	0.15	0.14
1171	chr01_71843965	0.47	0.53	0.47	0.5	0.87	0.5	0.37
1172	chr01_71865542	0.07	0.93	0.07	0.13	0.14	0.13	0.12
1173	chr01_71867566	0.98	0.02	0.02	0.04	0.04	0.04	0.04
1174	chr01_71876763	0.87	0.13	0.13	0.23	0.27	0.23	0.2
1175	chr01_71930903	0.62	0.38	0.38	0.47	0.72	0.47	0.36
1176	chr01_71959956	0.94	0.06	0.06	0.12	0.12	0.12	0.11
1177	chr01_71979188	0.12	0.88	0.12	0.21	0.24	0.21	0.19
1178	chr01_71984789	0.97	0.03	0.03	0.06	0.06	0.06	0.06
1179	chr01_72002374	0.98	0.02	0.02	0.03	0.04	0.03	0.03
1180	chr01_72008043	0.59	0.41	0.41	0.48	0.8	0.48	0.37
1181	chr01_72031984	0.61	0.39	0.39	0.48	0.72	0.48	0.36
1182	chr01_72061304	0.93	0.07	0.07	0.12	0.12	0.12	0.12
1183	chr01_72081599	0.09	0.91	0.09	0.16	0.18	0.16	0.15
1184	chr01_72086873	0.7	0.3	0.3	0.42	0.6	0.42	0.33
1185	chr01_72122133	0.56	0.44	0.44	0.49	0.81	0.49	0.37
1186	chr01_72123981	0.51	0.49	0.49	0.5	0.88	0.5	0.37
1187	chr01_72126298	0.57	0.43	0.43	0.49	0.83	0.49	0.37
1188	chr01_72171109	0.42	0.58	0.42	0.49	0.82	0.49	0.37
1189	chr01_72173564	0.44	0.56	0.44	0.49	0.84	0.49	0.37
1190	chr01_72177579	0.92	0.08	0.08	0.15	0.17	0.15	0.14
1191	chr01_72234985	0.23	0.77	0.23	0.35	0.45	0.35	0.29
1192	chr01_72281000	0.89	0.11	0.11	0.2	0.23	0.2	0.18
1193	chr01_72283752	0.57	0.43	0.43	0.49	0.82	0.49	0.37
1194	chr01_72285590	0.91	0.09	0.09	0.17	0.19	0.17	0.16
1195	chr01_72287346	0.97	0.03	0.03	0.06	0.06	0.06	0.05
1196	chr01_72315941	0.54	0.46	0.46	0.5	0.86	0.5	0.37
1197	chr01_72328200	0.6	0.4	0.4	0.48	0.77	0.48	0.37
1198	chr01_72333133	0.6	0.4	0.4	0.48	0.77	0.48	0.37
1199	chr01_72335345	0.54	0.46	0.46	0.5	0.86	0.5	0.37
1200	chr01_72337680	0.54	0.46	0.46	0.5	0.85	0.5	0.37
1201	chr01_72337941	0.54	0.46	0.46	0.5	0.85	0.5	0.37
1202	chr01_72339947	0.97	0.03	0.03	0.07	0.07	0.07	0.06
1203	chr01_72341495	0.92	0.08	0.08	0.14	0.16	0.14	0.13
1204	chr01_72384868	0.6	0.4	0.4	0.48	0.72	0.48	0.37
1205	chr01_72385715	0.54	0.46	0.46	0.5	0.85	0.5	0.37
1206	chr01_72407197	0.99	0.01	0.01	0.03	0.03	0.03	0.03
1207	chr01_72409600	0.98	0.02	0.02	0.03	0.03	0.03	0.03
1208	chr01_72413098	0.52	0.48	0.48	0.5	0.86	0.5	0.37
1209	chr01_72428411	0.52	0.48	0.48	0.5	0.86	0.5	0.37
1210	chr01_72436944	0.82	0.18	0.18	0.3	0.36	0.3	0.25
1211	chr01_72442390	0.76	0.24	0.24	0.36	0.47	0.36	0.3
1212	chr01_72451931	0.68	0.32	0.32	0.43	0.63	0.43	0.34
1213	chr01_72452767	0.99	0.01	0.01	0.03	0.03	0.03	0.03
1214	chr01_72453730	0.79	0.21	0.21	0.34	0.43	0.34	0.28
1215	chr01_72461582	0.93	0.07	0.07	0.12	0.13	0.12	0.12
1216	chr01_72465583	0.74	0.26	0.26	0.38	0.51	0.38	0.31
1217	chr01_72485798	0.66	0.34	0.34	0.45	0.62	0.45	0.35
1218	chr01_72556018	0.82	0.18	0.18	0.3	0.37	0.3	0.26
1219	chr01_72558384	0.79	0.21	0.21	0.33	0.42	0.33	0.28
1220	chr01_72562350	0.54	0.46	0.46	0.5	0.84	0.5	0.37
1221	chr01_72562642	0.74	0.26	0.26	0.38	0.51	0.38	0.31
1222	chr01_72611181	0.94	0.06	0.06	0.12	0.12	0.12	0.11
1223	chr01_72618113	0.81	0.19	0.19	0.31	0.38	0.31	0.26
1224	chr01_72620336	0.95	0.05	0.05	0.1	0.1	0.1	0.09
1225	chr01_72621618	0.69	0.31	0.31	0.42	0.58	0.42	0.33
1226	chr01_72622613	0.51	0.49	0.49	0.5	0.83	0.5	0.37
1227	chr01_72622672	0.84	0.16	0.16	0.27	0.33	0.27	0.24
1228	chr01_72651987	0.59	0.41	0.41	0.48	0.79	0.48	0.37
1229	chr01_72693590	0.82	0.18	0.18	0.3	0.36	0.3	0.25
1230	chr01_72786270	0.57	0.43	0.43	0.49	0.83	0.49	0.37
1231	chr01_72787721	0.52	0.48	0.48	0.5	0.83	0.5	0.37
1232	chr01_72811176	0.95	0.05	0.05	0.1	0.1	0.1	0.09
1233	chr01_72821560	0.94	0.06	0.06	0.11	0.12	0.11	0.11
1234	chr01_72822688	0.79	0.21	0.21	0.34	0.43	0.34	0.28
1235	chr01_72824922	0.62	0.38	0.38	0.47	0.74	0.47	0.36
1236	chr01_72827846	0.59	0.41	0.41	0.48	0.82	0.48	0.37
1237	chr01_72891195	0.68	0.32	0.32	0.44	0.62	0.44	0.34
1238	chr01_72899579	0.62	0.38	0.38	0.47	0.76	0.47	0.36
1239	chr01_72899704	0.79	0.21	0.21	0.33	0.41	0.33	0.27
1240	chr01_72923180	0.99	0.01	0.01	0.02	0.02	0.02	0.02
1241	chr01_72924793	0.47	0.53	0.47	0.5	0.72	0.5	0.37
1242	chr01_72969951	0.83	0.17	0.17	0.28	0.33	0.28	0.24
1243	chr01_72970866	0.64	0.36	0.36	0.46	0.61	0.46	0.36
1244	chr01_73049586	0.88	0.12	0.12	0.21	0.24	0.21	0.19
1245	chr01_73060791	0.95	0.05	0.05	0.09	0.1	0.09	0.09
1246	chr01_73076873	0.48	0.52	0.48	0.5	0.88	0.5	0.37
1247	chr01_73134392	0.75	0.25	0.25	0.38	0.51	0.38	0.31
1248	chr01_73148190	0.94	0.06	0.06	0.11	0.12	0.11	0.1
1249	chr01_73152048	0.83	0.17	0.17	0.28	0.34	0.28	0.24
1250	chr01_73152075	0.43	0.57	0.43	0.49	0.82	0.49	0.37
1251	chr01_73152426	0.42	0.58	0.42	0.49	0.79	0.49	0.37
1252	chr01_73152453	0.6	0.4	0.4	0.48	0.77	0.48	0.36
1253	chr01_73169145	0.75	0.25	0.25	0.37	0.49	0.37	0.3
1254	chr01_73186396	0.79	0.21	0.21	0.33	0.43	0.33	0.28
1255	chr01_73194361	0.82	0.18	0.18	0.29	0.36	0.29	0.25
1256	chr01_73201006	0.61	0.39	0.39	0.48	0.76	0.48	0.36
1257	chr01_73209144	0.5	0.5	0.5	0.5	0.86	0.5	0.37
1258	chr01_73212845	0.5	0.5	0.5	0.5	0.87	0.5	0.37
1259	chr01_73212855	0.5	0.5	0.5	0.5	0.87	0.5	0.37
1260	chr01_73213326	0.83	0.17	0.17	0.29	0.35	0.29	0.25
1261	chr01_73252559	0.32	0.68	0.32	0.43	0.6	0.43	0.34
1262	chr01_73308797	0.62	0.38	0.38	0.47	0.73	0.47	0.36
1263	chr01_73343969	0.95	0.05	0.05	0.1	0.1	0.1	0.09
1264	chr01_73355974	0.94	0.06	0.06	0.11	0.12	0.11	0.1
1265	chr01_73371756	0.47	0.53	0.47	0.5	0.87	0.5	0.37
1266	chr01_73381962	0.83	0.17	0.17	0.28	0.33	0.28	0.24
1267	chr01_73384006	0.84	0.16	0.16	0.26	0.31	0.26	0.23
1268	chr01_73390269	0.76	0.24	0.24	0.36	0.46	0.36	0.3
1269	chr01_73390356	0.85	0.15	0.15	0.26	0.3	0.26	0.22
1270	chr01_73409786	0.98	0.02	0.02	0.04	0.04	0.04	0.04
1271	chr01_73424794	0.92	0.08	0.08	0.14	0.16	0.14	0.13
1272	chr01_73451162	0.71	0.29	0.29	0.41	0.56	0.41	0.33
1273	chr01_73458368	0.97	0.03	0.03	0.05	0.05	0.05	0.05
1274	chr01_73470044	0.18	0.82	0.18	0.3	0.36	0.3	0.25
1275	chr01_73486016	0.71	0.29	0.29	0.42	0.59	0.42	0.33
1276	chr01_73487452	0.19	0.81	0.19	0.31	0.38	0.31	0.26
1277	chr01_73488820	0.94	0.06	0.06	0.11	0.12	0.11	0.1
1278	chr01_73494179	0.72	0.28	0.28	0.4	0.55	0.4	0.32
1279	chr01_73515752	0.42	0.58	0.42	0.49	0.69	0.49	0.37
1280	chr01_73587937	0.64	0.36	0.36	0.46	0.72	0.46	0.36
1281	chr01_73596787	0.46	0.54	0.46	0.5	0.81	0.5	0.37
1282	chr01_73598397	0.9	0.1	0.1	0.18	0.2	0.18	0.17
1283	chr01_73599299	0.54	0.46	0.46	0.5	0.84	0.5	0.37
1284	chr01_73617581	0.95	0.05	0.05	0.1	0.11	0.1	0.1
1285	chr01_73621616	0.73	0.27	0.27	0.39	0.53	0.39	0.31
1286	chr01_73623928	0.94	0.06	0.06	0.11	0.11	0.11	0.1
1287	chr01_73624408	0.4	0.6	0.4	0.48	0.77	0.48	0.37
1288	chr01_73634013	0.77	0.23	0.23	0.36	0.46	0.36	0.29
1289	chr01_73638321	0.65	0.35	0.35	0.46	0.7	0.46	0.35
1290	chr01_73639192	0.49	0.51	0.49	0.5	0.88	0.5	0.37
1291	chr01_73645113	0.39	0.61	0.39	0.48	0.77	0.48	0.36
1292	chr01_73646121	0.48	0.52	0.48	0.5	0.77	0.5	0.37
1293	chr01_73646194	0.76	0.24	0.24	0.36	0.47	0.36	0.3
1294	chr01_73651980	0.66	0.34	0.34	0.45	0.68	0.45	0.35
1295	chr01_73668795	0.93	0.07	0.07	0.13	0.14	0.13	0.12
1296	chr01_73672780	0.91	0.09	0.09	0.16	0.17	0.16	0.15
1297	chr01_73683193	0.93	0.07	0.07	0.12	0.13	0.12	0.12
1298	chr01_73690652	0.42	0.58	0.42	0.49	0.8	0.49	0.37
1299	chr01_73704783	0.9	0.1	0.1	0.18	0.2	0.18	0.16
1300	chr01_73715438	0.19	0.81	0.19	0.31	0.38	0.31	0.26
1301	chr01_73771954	0.94	0.06	0.06	0.1	0.11	0.1	0.1
1302	chr01_73801596	0.53	0.47	0.47	0.5	0.71	0.5	0.37
1303	chr01_73807190	0.69	0.31	0.31	0.43	0.61	0.43	0.34
1304	chr01_73814220	0.57	0.43	0.43	0.49	0.81	0.49	0.37
1305	chr01_73817538	0.97	0.03	0.03	0.06	0.07	0.06	0.06
1306	chr01_73847739	0.5	0.5	0.5	0.5	0.86	0.5	0.37
1307	chr01_73851476	0.43	0.57	0.43	0.49	0.69	0.49	0.37
1308	chr01_73855198	0.88	0.12	0.12	0.21	0.24	0.21	0.19
1309	chr01_73857156	0.75	0.25	0.25	0.38	0.5	0.38	0.31
1310	chr01_73862399	0.98	0.02	0.02	0.04	0.04	0.04	0.04
1311	chr01_73868798	0.97	0.03	0.03	0.06	0.07	0.06	0.06
1312	chr01_73893722	0.64	0.36	0.36	0.46	0.67	0.46	0.36
1313	chr01_73894325	0.77	0.23	0.23	0.36	0.45	0.36	0.29
1314	chr01_73900773	0.74	0.26	0.26	0.39	0.47	0.39	0.31
1315	chr01_73908116	0.56	0.44	0.44	0.49	0.78	0.49	0.37
1316	chr01_73911957	0.78	0.22	0.22	0.35	0.44	0.35	0.29
1317	chr01_73915994	0.84	0.16	0.16	0.27	0.32	0.27	0.23
1318	chr01_73927521	0.78	0.22	0.22	0.34	0.43	0.34	0.28
1319	chr01_73929124	0.9	0.1	0.1	0.17	0.19	0.17	0.16
1320	chr01_73929574	0.98	0.02	0.02	0.04	0.04	0.04	0.04
1321	chr01_73941471	0.81	0.19	0.19	0.3	0.37	0.3	0.26
1322	chr01_73945970	0.9	0.1	0.1	0.17	0.19	0.17	0.16
1323	chr01_73945977	0.85	0.15	0.15	0.25	0.3	0.25	0.22
1324	chr01_73961474	0.91	0.09	0.09	0.16	0.18	0.16	0.15
1325	chr01_74000436	0.62	0.38	0.38	0.47	0.65	0.47	0.36
1326	chr01_74071186	0.54	0.46	0.46	0.5	0.81	0.5	0.37
1327	chr01_74073920	0.59	0.41	0.41	0.48	0.81	0.48	0.37
1328	chr01_74079976	0.87	0.13	0.13	0.22	0.25	0.22	0.2
1329	chr01_74082326	0.9	0.1	0.1	0.19	0.21	0.19	0.17
1330	chr01_74090776	0.93	0.07	0.07	0.12	0.13	0.12	0.12
1331	chr01_74102215	0.54	0.46	0.46	0.5	0.81	0.5	0.37
1332	chr01_74132832	0.3	0.7	0.3	0.42	0.58	0.42	0.33
1333	chr01_74137847	0.33	0.67	0.33	0.44	0.64	0.44	0.34
1334	chr01_74143196	0.9	0.1	0.1	0.19	0.21	0.19	0.17
1335	chr01_74171944	0.98	0.02	0.02	0.04	0.04	0.04	0.04
1336	chr01_74175983	0.54	0.46	0.46	0.5	0.78	0.5	0.37
1337	chr01_74190472	0.1	0.9	0.1	0.18	0.2	0.18	0.17
1338	chr01_74199199	0.99	0.01	0.01	0.03	0.03	0.03	0.03
1339	chr01_74253207	0.9	0.1	0.1	0.18	0.2	0.18	0.16
1340	chr01_74255819	0.71	0.29	0.29	0.41	0.57	0.41	0.33
1341	chr01_74285910	0.51	0.49	0.49	0.5	0.86	0.5	0.37
1342	chr01_74311673	0.55	0.45	0.45	0.5	0.84	0.5	0.37
1343	chr01_74318792	0.15	0.85	0.15	0.25	0.29	0.25	0.22
1344	chr01_74325777	0.64	0.36	0.36	0.46	0.63	0.46	0.36
1345	chr01_74328108	0.61	0.39	0.39	0.48	0.74	0.48	0.36
1346	chr01_74351664	0.89	0.11	0.11	0.19	0.21	0.19	0.17
1347	chr01_74354720	0.3	0.7	0.3	0.42	0.61	0.42	0.33
1348	chr01_74355400	0.86	0.14	0.14	0.24	0.28	0.24	0.21
1349	chr01_74366954	0.97	0.03	0.03	0.05	0.06	0.05	0.05
1350	chr01_74404151	0.51	0.49	0.49	0.5	0.87	0.5	0.37
1351	chr01_74408000	0.72	0.28	0.28	0.41	0.53	0.41	0.32
1352	chr01_74441492	0.54	0.46	0.46	0.5	0.78	0.5	0.37
1353	chr01_74443198	0.91	0.09	0.09	0.17	0.18	0.17	0.15
1354	chr01_74444910	0.85	0.15	0.15	0.25	0.29	0.25	0.22
1355	chr01_74449563	0.97	0.03	0.03	0.06	0.06	0.06	0.06
1356	chr01_74495102	0.89	0.11	0.11	0.2	0.22	0.2	0.18
1357	chr01_74521518	0.68	0.32	0.32	0.44	0.64	0.44	0.34
1358	chr01_74524882	0.4	0.6	0.4	0.48	0.78	0.48	0.37
1359	chr01_74524913	0.55	0.45	0.45	0.5	0.86	0.5	0.37
1360	chr01_74565714	0.12	0.88	0.12	0.21	0.24	0.21	0.19
1361	chr01_74568487	0.66	0.34	0.34	0.45	0.66	0.45	0.35
1362	chr01_74568859	0.94	0.06	0.06	0.12	0.13	0.12	0.11
1363	chr01_74572984	0.67	0.33	0.33	0.44	0.64	0.44	0.34
1364	chr01_74577597	0.52	0.48	0.48	0.5	0.83	0.5	0.37
1365	chr01_74590154	0.65	0.35	0.35	0.46	0.7	0.46	0.35
1366	chr01_74647626	0.48	0.52	0.48	0.5	0.85	0.5	0.37
1367	chr01_74649555	0.61	0.39	0.39	0.48	0.76	0.48	0.36
1368	chr01_74651501	0.67	0.33	0.33	0.44	0.65	0.44	0.34
1369	chr01_74672726	0.89	0.11	0.11	0.2	0.23	0.2	0.18
1370	chr01_74674431	0.9	0.1	0.1	0.18	0.2	0.18	0.16
1371	chr01_74689547	0.68	0.32	0.32	0.44	0.61	0.44	0.34
1372	chr01_74708094	0.62	0.38	0.38	0.47	0.75	0.47	0.36
1373	chr01_74720825	0.6	0.4	0.4	0.48	0.79	0.48	0.36
1374	chr01_74721041	0.81	0.19	0.19	0.31	0.38	0.31	0.26
1375	chr01_74769322	0.48	0.52	0.48	0.5	0.88	0.5	0.37
1376	chr01_74769337	0.7	0.3	0.3	0.42	0.59	0.42	0.33
1377	chr01_74769409	0.8	0.2	0.2	0.32	0.4	0.32	0.27
1378	chr01_74776404	0.5	0.5	0.5	0.5	0.73	0.5	0.38
1379	chr01_74776432	0.74	0.26	0.26	0.38	0.49	0.38	0.31
1380	chr01_74787173	0.79	0.21	0.21	0.33	0.42	0.33	0.28
1381	chr01_74794275	0.53	0.47	0.47	0.5	0.86	0.5	0.37
1382	chr01_74808800	0.73	0.27	0.27	0.4	0.55	0.4	0.32
1383	chr01_74816276	0.68	0.32	0.32	0.43	0.63	0.43	0.34
1384	chr01_74821560	0.96	0.04	0.04	0.07	0.08	0.07	0.07
1385	chr01_74849405	0.7	0.3	0.3	0.42	0.59	0.42	0.33
1386	chr01_74861181	0.7	0.3	0.3	0.42	0.59	0.42	0.33
1387	chr01_74921456	0.43	0.57	0.43	0.49	0.8	0.49	0.37
1388	chr01_75009289	0.8	0.2	0.2	0.32	0.4	0.32	0.27
1389	chr01_75016767	0.95	0.05	0.05	0.1	0.11	0.1	0.1
1390	chr01_75053929	0.5	0.5	0.5	0.5	0.88	0.5	0.37
1391	chr01_75055165	0.97	0.03	0.03	0.06	0.06	0.06	0.06
1392	chr01_75058295	0.5	0.5	0.5	0.5	0.87	0.5	0.37
1393	chr01_75063488	0.5	0.5	0.5	0.5	0.88	0.5	0.37
[truncated: 17,088 more rows]

## Sheet: Supplementary Table S4
Supplementary Table S4. Clone heterozygosity (Ho) and inbred coefficient (Fi).
[truncated: 451 more rows]

[truncated: 4 more sheets: Supplementary Table S5, Supplementary Table S6, Supplementary Table S7, Supplementary Table S8]
